# Supplementary material for: A Short Mental Health Literacy Scale: Validation and Application in Brazil
Source: Research Square preprint supplement (doi:10.21203/rs.3.rs-4225202/v1), 2024-04-15
Supplement: Supplementary file 1 [file c3763287ccaf47c1bdd3f2ec.xlsx]

## Sheet: Sheet
respondent_id	collector_id	date_created	date_modified	ip_address	email_address	first_name	last_name	custom_1	Eu declaro que:	Idade	Gênero	Raça Cor	Escolaridade	Você trabalha?	Qual a sua renda mensal, aproximadamente?	Você vive sozinho?	Local de residência	Utiliza serviços de saúde do SUS ou de redes particulares?	Você faz uso frequente de algum medicamento?	Você é uma pessoa com deficiência (PCD)?	Algum médico já te disse que você tem alguma das condições a seguir? Clique em todas as que se aplicam:							Se uma pessoa torna-se amedrontada de estar sendo avaliada (o) por outras pessoas durante situações de performance (seja em uma festa e/ou em uma apresentação em reunião) e por este motivo essa pessoa passa agir de forma humilhante e constrangedora. Você pensa que essa pessoa tem Fobia Social?	Se uma pessoa vivencia uma preocupação excessiva sobre uma situação ou uma série de eventos ou atividades nos quais o nível de tanta preocupação não se justifica e que por isso tem dificuldades para controlar essa preocupação e acaba desenvolvendo sintomas físicos como musculatura tensionada e sensação de fadiga. Você pensa que essa pessoa tem Transtorno de Ansiedade Generalizada?	Se uma pessoa vivencia uma diminuição de humor entre duas ou mais semanas tendo também diminuição do prazer e interesse nas atividades normais, mudanças no apetite e no padrão do sono. Você pensa que essa pessoa tem Transtorno Depressivo Maior?	Para você, Transtorno de Personalidade é uma categoria de doença mental?	Até que ponto você acha provável que o Transtorno Depressivo Persistente (distimia) seja um transtorno mental?	Para você, o diagnóstico de Agorafobia inclui também a ansiedade sobre situações em que a possibilidade de retirar-se parece ser difícil ou constrangedora?	Para você, o diagnóstico de Transtorno Bipolar inclui também vivencias períodos de alternâncias de elevação e diminuição de humor.	Até que ponto você acha provável que o diagnóstico de Transtorno por Abuso de Substâncias (Dependência de Drogas) possa incluir tolerância física e psicológica à droga (requer maior quantidade de droga para ter o mesmo efeito)?	Você pensa que, em geral no Brasil, mulheres estão mais propensas a vivenciar um transtorno mental de qualquer tipo, se comparado a homens?	Você pensa que em geral no Brasil, homens estão mais propensos a vivenciar transtorno de ansiedade se comparado a mulheres?	Para uma pessoa que tem dificuldades de administrar suas emoções está se tornando ansiosa e/ou depressiva, melhorar a qualidade do sono seria algo bom?	Para uma pessoa que tem dificuldades de administrar suas emoções seria bom evitar todas as atividades ou situações que fazem sentir-se ansioso (a)	Você pensa que Terapia Cognitivo Comportamental (TCC) é uma terapia baseada em desafiar pensamentos negativos e aumentar comportamentos benéficos?	Você pensa que, se você e outras pessoas estão em risco imediato de dano e/ou de vida a quebra da confidencialidade pelo profissional em saúde mental é permitida.	Você pensa que, se a sua situação não for de risco imediato de dano e/ou de vida e eles querem ajudar outras pessoas a apoiá-lo melhor, a quebra da confidencialidade pelo profissional em saúde mental é permitida	Estou seguro(a) que eu sei onde buscar informações sobre transtorno mental.	Estou seguro(a) ao usar computador ou telefone busco informações sobre problema de saúde mental.	Estou seguro(a) que comparecendo pessoalmente em consulta com clinico geral, obtenho informações sobre doenças mentais.	Estou confiante que tenho acesso a recursos que posso usar para obter informações sobre transtorno mental (ex. profissional de saúde, amigos)	Pessoas com transtorno mental poderiam ficar bem se elas quisessem.	Transtorno mental é um sinal de fraqueza pessoal.	Transtorno mental não é realmente uma doença.
									Response	Response	Response	Response	Response	Response	Response	Response	Response	Response	Response	Response	Hipertensão/pressão alta	Diabetes	Depressão	Doenças cardiovasculares como infarto, derrame ou insuficiência cardíaca	Câncer, exceto de pele	Nenhuma condição	Outro (especifique)	Response	Response	Response	Response	Response	Response	Response	Response	Response	Response	Response	Response	Response	Response	Response	Response	Response	Response	Response	Response	Response	Response
114471783882	428177658	2023-11-24 17:28:41	2023-11-24 17:44:56	138.0.244.184					Aceito os termos acima e concordo em participar da pesquisa.	18-25	Masculino	Branca	Superior Incompleto	Sim, com vínculo empregatício	De 1 a 3 salários mínimos (R$1.320 a R$3.960)	Não	Sudoeste/Octogonal	Redes Particulares	Não	Não						Nenhuma condição		Improvável	Provável	Muito improvável	Provável	Provável	Provável	Provável	Muito provável	Improvável	Provável	Muito Útil	Inútil	Provável	Provável	Muito improvável	Discordo parcialmente	Concordo parcialmente	Concordo parcialmente	Concordo totalmente	Concordo parcialmente	Concordo parcialmente	Discordo parcialmente
114471776145	428177658	2023-11-24 17:17:09	2023-11-24 17:28:30	138.0.244.184					Aceito os termos acima e concordo em participar da pesquisa.	41-45	Masculino	Branca	Superior Completo	Sim, com vínculo empregatício	De 6 a 9 salários mínimos (R$7.920 a R$11.880)	Não	Sudoeste/Octogonal	Redes Particulares	Não	Não						Nenhuma condição		Provável	Muito provável	Provável	Provável	Provável	Provável	Muito provável	Muito provável	Provável	Provável	Muito Útil	Útil	Provável	Muito provável	Improvável	Concordo parcialmente	Concordo totalmente	Discordo totalmente	Concordo totalmente	Discordo totalmente	Discordo totalmente	Não concordo nem discordo
114471770323	428177658	2023-11-24 16:54:49	2023-11-24 17:16:07	138.0.244.184					Aceito os termos acima e concordo em participar da pesquisa.	26-50	Masculino	Branca	Superior Completo	Sim, com vínculo empregatício	De 3 a 6 salários mínimos (R$3.960 a R$7.920)	Não	Cruzeiro	SUS e Redes Particulares	Não	Não						Nenhuma condição		Provável	Muito provável	Improvável	Muito provável	Provável	Provável	Provável	Muito provável	Improvável	Improvável	Útil	Muito Útil	Muito provável	Provável	Improvável	Concordo totalmente	Concordo parcialmente	Concordo parcialmente	Concordo totalmente	Discordo parcialmente	Discordo totalmente	Concordo parcialmente
114471759172	428177658	2023-11-24 16:37:57	2023-11-24 16:54:32	138.0.244.184					Aceito os termos acima e concordo em participar da pesquisa.	31-35	Masculino	Branca	Superior Completo	Sim, com vínculo empregatício	De 6 a 9 salários mínimos (R$7.920 a R$11.880)	Não	Cruzeiro	Redes Particulares	Não	Não						Nenhuma condição		Provável	Provável	Provável	Muito provável	Muito provável	Provável	Provável	Provável	Provável	Provável	Muito Útil	Útil	Improvável	Provável	Improvável	Concordo parcialmente	Concordo parcialmente	Discordo parcialmente	Concordo parcialmente	Discordo totalmente	Discordo totalmente	Discordo totalmente
114471748929	428177658	2023-11-24 16:20:50	2023-11-24 16:36:28	138.0.244.184					Aceito os termos acima e concordo em participar da pesquisa.	31-35	Masculino	Preta	Superior Completo	Sim, com vínculo empregatício	De 6 a 9 salários mínimos (R$7.920 a R$11.880)	Não	Plano Piloto	Redes Particulares	Não	Não						Nenhuma condição		Improvável	Provável	Provável	Provável	Muito provável	Provável	Muito provável	Muito provável	Provável	Improvável	Muito Útil	Útil	Provável	Provável	Improvável	Concordo parcialmente	Concordo parcialmente	Discordo totalmente	Concordo totalmente	Concordo parcialmente	Discordo totalmente	Discordo parcialmente
114471736581	428177658	2023-11-24 15:58:59	2023-11-24 16:19:51	138.0.244.184					Aceito os termos acima e concordo em participar da pesquisa.	26-50	Masculino	Branca	Superior Completo	Sim, sem vínculo empregatício	De 6 a 9 salários mínimos (R$7.920 a R$11.880)	Não	Sudoeste/Octogonal	Redes Particulares	Não	Não						Nenhuma condição		Provável	Muito provável	Improvável	Provável	Muito provável	Provável	Muito provável	Provável	Provável	Improvável	Útil	Útil	Provável	Improvável	Provável	Concordo totalmente	Concordo parcialmente	Concordo parcialmente	Concordo totalmente	Discordo totalmente	Discordo totalmente	Discordo totalmente
114471722377	428177658	2023-11-24 15:40:14	2023-11-24 15:58:43	138.0.244.184					Aceito os termos acima e concordo em participar da pesquisa.	41-45	Masculino	Preta	Superior Completo	Sim, com vínculo empregatício	De 3 a 6 salários mínimos (R$3.960 a R$7.920)	Não	Candangolândia	SUS e Redes Particulares	Não	Não						Nenhuma condição		Provável	Provável	Improvável	Provável	Provável	Provável	Muito provável	Provável	Provável	Improvável	Útil	Útil	Muito provável	Provável	Improvável	Concordo totalmente	Concordo parcialmente	Concordo parcialmente	Concordo parcialmente	Discordo totalmente	Discordo totalmente	Discordo totalmente
114471713712	428177658	2023-11-24 15:24:24	2023-11-24 15:39:56	138.0.244.184					Aceito os termos acima e concordo em participar da pesquisa.	31-35	Masculino	Parda	Superior Completo	Sim, sem vínculo empregatício	De 3 a 6 salários mínimos (R$3.960 a R$7.920)	Não	Sudoeste/Octogonal	SUS e Redes Particulares	Sim	Não		Diabetes						Improvável	Provável	Provável	Provável	Improvável	Improvável	Provável	Provável	Provável	Muito provável	Útil	Inútil	Provável	Provável	Improvável	Concordo parcialmente	Concordo parcialmente	Concordo totalmente	Concordo parcialmente	Concordo parcialmente	Discordo totalmente	Discordo totalmente
114471706171	428177658	2023-11-24 15:18:16	2023-11-24 15:24:08	138.0.244.184					Aceito os termos acima e concordo em participar da pesquisa.	41-45	Masculino	Branca	Superior Completo	Sim, com vínculo empregatício	De 6 a 9 salários mínimos (R$7.920 a R$11.880)	Não	Sudoeste/Octogonal	SUS e Redes Particulares	Não	Não						Nenhuma condição		Muito provável	Provável	Provável	Muito provável	Provável	Provável	Provável	Muito provável	Provável	Improvável	Útil	Útil	Muito provável	Provável	Improvável	Concordo parcialmente	Concordo totalmente	Discordo parcialmente	Concordo parcialmente	Discordo parcialmente	Discordo totalmente	Discordo parcialmente
114471689150	428177658	2023-11-24 14:23:53	2023-11-24 14:51:39	138.0.244.184					Aceito os termos acima e concordo em participar da pesquisa.	26-30	Masculino	Branca	Superior Completo	Sim, com vínculo empregatício	De 3 a 6 salários mínimos (R$3.960 a R$7.920)	Não	Sudoeste/Octogonal	Redes Particulares	Não	Não						Nenhuma condição		Muito provável	Provável	Provável	Provável	Muito provável	Provável	Muito provável	Provável	Muito provável	Provável	Muito Útil	Útil	Provável	Muito provável	Provável	Concordo parcialmente	Concordo totalmente	Discordo parcialmente	Concordo totalmente	Discordo parcialmente	Discordo totalmente	Discordo totalmente
114471674043	428177658	2023-11-24 14:16:11	2023-11-24 14:23:40	138.0.244.184					Aceito os termos acima e concordo em participar da pesquisa.	18-25	Masculino	Branca	Superior Incompleto	Não	Até 1 salário mínimo (R$ 1.320)	Não	Cruzeiro	Redes Particulares	Não	Não						Nenhuma condição		Provável	Provável	Provável	Provável	Muito provável	Provável	Muito provável	Provável	Provável	Improvável	Útil	Útil	Provável	Provável	Provável	Concordo parcialmente	Concordo parcialmente	Concordo parcialmente	Concordo parcialmente	Discordo totalmente	Discordo totalmente	Discordo totalmente
114471631702	428177658	2023-11-24 12:58:46	2023-11-24 13:13:05	189.40.77.88					Aceito os termos acima e concordo em participar da pesquisa.	50+	Masculino	Parda	Ensino Médio completo	Não	De 3 a 6 salários mínimos (R$3.960 a R$7.920)	Não	Cruzeiro	SUS e Redes Particulares	Não	Não						Nenhuma condição		Provável	Provável	Provável	Improvável	Muito provável	Provável	Provável	Provável	Provável	Provável	Muito Útil	Muito Inútil	Muito provável	Provável	Provável	Concordo parcialmente	Discordo parcialmente	Concordo parcialmente	Concordo parcialmente	Discordo parcialmente	Discordo totalmente	Discordo totalmente
114471620598	428177658	2023-11-24 12:50:11	2023-11-24 12:56:05	189.40.77.88					Aceito os termos acima e concordo em participar da pesquisa.	26-50	Masculino	Amarela	Superior Completo	Sim, com vínculo empregatício	De 6 a 9 salários mínimos (R$7.920 a R$11.880)	Não	Sudoeste/Octogonal	Redes Particulares	Não	Não						Nenhuma condição		Provável	Provável	Improvável	Provável	Provável	Provável	Muito provável	Muito provável	Muito provável	Improvável	Muito Útil	Inútil	Muito provável	Muito provável	Improvável	Concordo parcialmente	Concordo parcialmente	Discordo parcialmente	Concordo parcialmente	Discordo totalmente	Discordo totalmente	Discordo parcialmente
114471599726	428177658	2023-11-24 12:06:45	2023-11-24 12:24:32	189.40.77.88					Aceito os termos acima e concordo em participar da pesquisa.	26-30	Masculino	Branca	Superior Completo	Sim, com vínculo empregatício	De 3 a 6 salários mínimos (R$3.960 a R$7.920)	Não	Cruzeiro	Redes Particulares	Não	Não						Nenhuma condição		Provável	Provável	Provável	Provável	Provável	Provável	Provável	Provável	Provável	Provável	Muito Útil	Útil	Muito provável	Provável	Improvável	Concordo parcialmente	Concordo parcialmente	Concordo parcialmente	Concordo parcialmente	Concordo parcialmente	Discordo totalmente	Discordo totalmente
114471585839	428177658	2023-11-24 11:57:17	2023-11-24 12:04:27	189.40.77.38					Aceito os termos acima e concordo em participar da pesquisa.	31-35	Masculino	Parda	Ensino Médio completo	Sim, sem vínculo empregatício	De 1 a 3 salários mínimos (R$1.320 a R$3.960)	Não	Sobradinho	SUS	Não	Não						Nenhuma condição		Provável	Provável	Improvável	Improvável	Provável	Provável	Provável	Provável	Improvável	Muito provável	Muito Útil	Útil	Provável	Provável	Provável	Não concordo nem discordo	Concordo parcialmente	Concordo totalmente	Discordo parcialmente	Discordo totalmente	Discordo totalmente	Discordo parcialmente
114471559976	428177658	2023-11-24 11:22:31	2023-11-24 11:27:01	189.40.77.87					Aceito os termos acima e concordo em participar da pesquisa.	31-35	Masculino	Branca	Superior Completo	Sim, sem vínculo empregatício	De 1 a 3 salários mínimos (R$1.320 a R$3.960)	Não	Sudoeste/Octogonal	Redes Particulares	Não	Não						Nenhuma condição		Provável	Provável	Improvável	Muito provável	Muito provável	Provável	Muito provável	Muito provável	Muito provável	Muito provável	Muito Útil	Inútil	Muito provável	Muito provável	Muito improvável	Concordo totalmente	Concordo totalmente	Concordo parcialmente	Concordo totalmente	Discordo totalmente	Discordo totalmente	Discordo totalmente
114471548827	428177658	2023-11-24 10:55:00	2023-11-24 11:11:15	189.40.77.87					Aceito os termos acima e concordo em participar da pesquisa.	50+	Masculino	Parda	Superior Completo	Não	De 3 a 6 salários mínimos (R$3.960 a R$7.920)	Não	Cruzeiro	Redes Particulares	Sim	Não				Doenças cardiovasculares como infarto, derrame ou insuficiência cardíaca				Provável	Provável	Provável	Muito provável	Provável	Provável	Provável	Muito provável	Provável	Provável	Útil	Útil	Provável	Provável	Provável	Concordo parcialmente	Discordo parcialmente	Discordo parcialmente	Discordo parcialmente	Discordo parcialmente	Discordo parcialmente	Discordo totalmente
114471528934	428177658	2023-11-24 10:36:15	2023-11-24 10:42:48	177.51.63.221					Aceito os termos acima e concordo em participar da pesquisa.	26-30	Masculino	Branca	Superior Completo	Sim, com vínculo empregatício	De 6 a 9 salários mínimos (R$7.920 a R$11.880)	Não	Sudoeste/Octogonal	Redes Particulares	Sim	Não	Hipertensão/pressão alta							Improvável	Provável	Improvável	Muito provável	Provável	Provável	Provável	Provável	Muito provável	Provável	Muito Útil	Útil	Provável	Muito provável	Improvável	Concordo parcialmente	Concordo totalmente	Discordo totalmente	Concordo parcialmente	Discordo totalmente	Discordo totalmente	Discordo totalmente
114471063140	428177658	2023-11-23 17:25:29	2023-11-23 17:36:14	138.0.244.184					Aceito os termos acima e concordo em participar da pesquisa.	50+	Masculino	Branca	Superior Completo	Sim, sem vínculo empregatício	Mais de 20 salários mínimos ( mais de R$26.400)	Não	Água Claras	Redes Particulares	Sim	Não						Nenhuma condição		Improvável	Provável	Improvável	Provável	Provável	Provável	Provável	Provável	Provável	Improvável	Muito Útil	Útil	Muito provável	Provável	Improvável	Concordo totalmente	Concordo parcialmente	Concordo parcialmente	Concordo totalmente	Discordo parcialmente	Discordo parcialmente	Discordo totalmente
114471053509	428177658	2023-11-23 16:57:15	2023-11-23 17:13:41	138.0.244.184					Aceito os termos acima e concordo em participar da pesquisa.	41-45	Masculino	Parda	Superior Completo	Não	De 1 a 3 salários mínimos (R$1.320 a R$3.960)	Não	Taguatinga	SUS	Não	Não						Nenhuma condição		Improvável	Provável	Muito provável	Provável	Improvável	Provável	Provável	Provável	Muito provável	Provável	Útil	Muito Inútil	Muito provável	Muito provável	Improvável	Concordo parcialmente	Concordo parcialmente	Concordo totalmente	Concordo parcialmente	Concordo parcialmente	Discordo totalmente	Discordo totalmente
114471045753	428177658	2023-11-23 16:42:28	2023-11-23 16:56:33	138.0.244.184					Aceito os termos acima e concordo em participar da pesquisa.	31-35	Masculino	Branca	Superior Completo	Sim, com vínculo empregatício	De 3 a 6 salários mínimos (R$3.960 a R$7.920)	Não	Água Claras	SUS e Redes Particulares	Não	Não						Nenhuma condição		Improvável	Provável	Provável	Provável	Muito provável	Provável	Muito provável	Provável	Muito provável	Provável	Muito Útil	Inútil	Muito provável	Muito provável	Improvável	Concordo totalmente	Concordo parcialmente	Concordo parcialmente	Concordo totalmente	Discordo parcialmente	Discordo totalmente	Discordo totalmente
114471039288	428177658	2023-11-23 16:30:19	2023-11-23 16:42:09	138.0.244.184					Aceito os termos acima e concordo em participar da pesquisa.	41-45	Masculino	Branca	Superior Completo	Sim, com vínculo empregatício	De 3 a 6 salários mínimos (R$3.960 a R$7.920)	Não	Água Claras	Redes Particulares	Não	Não						Nenhuma condição		Muito provável	Provável	Provável	Muito provável	Muito provável	Provável	Provável	Provável	Muito provável	Muito provável	Útil	Útil	Muito provável	Provável	Improvável	Concordo totalmente	Concordo totalmente	Discordo parcialmente	Concordo totalmente	Concordo parcialmente	Discordo totalmente	Discordo totalmente
114471033750	428177658	2023-11-23 16:17:51	2023-11-23 16:29:59	138.0.244.184					Aceito os termos acima e concordo em participar da pesquisa.	26-50	Masculino	Preta	Fundamental completo	Sim, com vínculo empregatício	De 1 a 3 salários mínimos (R$1.320 a R$3.960)	Não	Recanto Das Emas	SUS	Não	Não						Nenhuma condição		Improvável	Provável	Provável	Improvável	Muito provável	Provável	Muito provável	Muito provável	Provável	Muito improvável	Muito Útil	Útil	Provável	Provável	Provável	Concordo parcialmente	Concordo parcialmente	Discordo totalmente	Concordo totalmente	Concordo parcialmente	Discordo parcialmente	Discordo totalmente
114471027419	428177658	2023-11-23 16:08:00	2023-11-23 16:15:49	138.0.244.184					Aceito os termos acima e concordo em participar da pesquisa.	50+	Masculino	Branca	Superior Completo	Sim, com vínculo empregatício	De 6 a 9 salários mínimos (R$7.920 a R$11.880)	Não	Água Claras	Redes Particulares	Não	Não						Nenhuma condição		Provável	Muito provável	Provável	Provável	Provável	Improvável	Provável	Provável	Muito provável	Provável	Útil	Útil	Muito provável	Provável	Provável	Concordo parcialmente	Concordo totalmente	Concordo parcialmente	Concordo parcialmente	Discordo totalmente	Discordo totalmente	Discordo parcialmente
114471023691	428177658	2023-11-23 15:58:40	2023-11-23 16:07:36	138.0.244.184					Aceito os termos acima e concordo em participar da pesquisa.	50+	Masculino	Branca	Superior Completo	Sim, sem vínculo empregatício	De 10 a 20 salários mínimos (R$13.200 a R$26.400)	Não	Arniqueira	Redes Particulares	Não	Não						Nenhuma condição		Provável	Provável	Muito provável	Improvável	Provável	Provável	Provável	Muito provável	Muito provável	Improvável	Útil	Útil	Muito provável	Provável	Provável	Concordo parcialmente	Discordo parcialmente	Discordo parcialmente	Concordo parcialmente	Discordo totalmente	Discordo parcialmente	Discordo totalmente
114471018936	428177658	2023-11-23 15:51:17	2023-11-23 15:57:10	138.0.244.184					Aceito os termos acima e concordo em participar da pesquisa.	31-35	Masculino	Parda	Ensino Médio completo	Sim, sem vínculo empregatício	De 1 a 3 salários mínimos (R$1.320 a R$3.960)	Não	Taguatinga	SUS	Não	Não						Nenhuma condição		Provável	Muito provável	Provável	Provável	Provável	Muito improvável	Improvável	Provável	Provável	Improvável	Útil	Útil	Provável	Provável	Improvável	Discordo parcialmente	Concordo parcialmente	Discordo totalmente	Concordo totalmente	Discordo totalmente	Discordo totalmente	Discordo totalmente
114471013221	428177658	2023-11-23 15:28:43	2023-11-23 15:44:54	138.0.244.184					Aceito os termos acima e concordo em participar da pesquisa.	18-25	Masculino	Parda	Superior Incompleto	Sim, com vínculo empregatício	De 1 a 3 salários mínimos (R$1.320 a R$3.960)	Não	Guará	SUS e Redes Particulares	Não	Não						Nenhuma condição		Provável	Provável	Provável	Improvável	Muito provável	Provável	Provável	Provável	Provável	Provável	Muito Útil	Muito Inútil	Muito provável	Provável	Provável	Concordo parcialmente	Discordo totalmente	Concordo parcialmente	Concordo parcialmente	Discordo parcialmente	Discordo totalmente	Concordo parcialmente
114471005771	428177658	2023-11-23 15:12:51	2023-11-23 15:28:20	138.0.244.184					Aceito os termos acima e concordo em participar da pesquisa.	31-35	Masculino	Parda	Superior Completo	Sim, com vínculo empregatício	De 6 a 9 salários mínimos (R$7.920 a R$11.880)	Sim	Água Claras	Redes Particulares	Não	Não						Nenhuma condição		Provável	Provável	Improvável	Provável	Provável	Provável	Muito provável	Provável	Provável	Provável	Útil	Útil	Muito provável	Muito provável	Muito improvável	Discordo totalmente	Concordo parcialmente	Concordo parcialmente	Concordo parcialmente	Discordo parcialmente	Concordo parcialmente	Discordo totalmente
114470997564	428177658	2023-11-23 14:59:52	2023-11-23 15:11:57	138.0.244.184					Aceito os termos acima e concordo em participar da pesquisa.	41-45	Masculino	Branca	Superior Completo	Sim, sem vínculo empregatício	De 6 a 9 salários mínimos (R$7.920 a R$11.880)	Não	Jardim Botânico	Redes Particulares	Não	Não						Nenhuma condição		Provável	Provável	Provável	Provável	Provável	Provável	Muito provável	Improvável	Muito provável	Improvável	Muito Útil	Útil	Muito provável	Muito provável	Provável	Discordo parcialmente	Concordo parcialmente	Concordo parcialmente	Discordo totalmente	Concordo parcialmente	Discordo totalmente	Discordo parcialmente
114470991079	428177658	2023-11-23 14:46:59	2023-11-23 14:59:29	138.0.244.184					Aceito os termos acima e concordo em participar da pesquisa.	36-40	Masculino	Branca	Superior Completo	Sim, com vínculo empregatício	De 3 a 6 salários mínimos (R$3.960 a R$7.920)	Não	Taguatinga	Redes Particulares	Sim	Não	Hipertensão/pressão alta							Provável	Provável	Muito provável	Provável	Muito provável	Provável	Muito provável	Muito provável	Provável	Improvável	Útil	Muito Útil	Provável	Muito provável	Provável	Concordo parcialmente	Concordo parcialmente	Discordo parcialmente	Concordo parcialmente	Discordo totalmente	Discordo totalmente	Concordo parcialmente
114470984555	428177658	2023-11-23 14:27:59	2023-11-23 14:46:35	138.0.244.184					Aceito os termos acima e concordo em participar da pesquisa.	36-40	Masculino	Branca	Superior Completo	Sim, com vínculo empregatício	De 3 a 6 salários mínimos (R$3.960 a R$7.920)	Sim	Água Claras	Redes Particulares	Não	Não						Nenhuma condição		Improvável	Provável	Improvável	Provável	Provável	Provável	Muito provável	Provável	Muito provável	Improvável	Muito Útil	Útil	Provável	Muito provável	Improvável	Concordo totalmente	Concordo totalmente	Discordo totalmente	Discordo parcialmente	Concordo parcialmente	Discordo parcialmente	Discordo totalmente
114470973530	428177658	2023-11-23 14:01:37	2023-11-23 14:26:08	138.0.244.184					Aceito os termos acima e concordo em participar da pesquisa.	31-35	Masculino	Parda	Ensino Médio completo	Sim, com vínculo empregatício	De 1 a 3 salários mínimos (R$1.320 a R$3.960)	Não	Planaltina	SUS	Não	Não						Nenhuma condição		Provável	Muito provável	Provável	Provável	Muito provável	Improvável	Muito provável	Muito provável	Provável	Improvável	Útil	Inútil	Muito provável	Provável	Provável	Discordo parcialmente	Concordo parcialmente	Concordo parcialmente	Concordo parcialmente	Concordo parcialmente	Discordo totalmente	Discordo totalmente
114470959870	428177658	2023-11-23 13:53:48	2023-11-23 14:01:12	138.0.244.184					Aceito os termos acima e concordo em participar da pesquisa.	50+	Masculino	Branca	Ensino Médio completo	Não	De 6 a 9 salários mínimos (R$7.920 a R$11.880)	Não	Água Claras	Redes Particulares	Não	Não						Nenhuma condição		Provável	Muito provável	Improvável	Muito provável	Provável	Muito improvável	Provável	Provável	Improvável	Improvável	Muito Útil	Útil	Muito provável	Provável	Improvável	Concordo totalmente	Concordo parcialmente	Concordo parcialmente	Concordo totalmente	Discordo parcialmente	Discordo totalmente	Concordo parcialmente
114470912323	428177658	2023-11-23 12:19:32	2023-11-23 12:41:49	138.0.244.184					Aceito os termos acima e concordo em participar da pesquisa.	41-45	Masculino	Branca	Superior Completo	Sim, com vínculo empregatício	De 6 a 9 salários mínimos (R$7.920 a R$11.880)	Não	Arniqueira	Redes Particulares	Não	Não						Nenhuma condição		Provável	Muito provável	Improvável	Improvável	Provável	Provável	Provável	Muito provável	Provável	Provável	Inútil	Inútil	Provável	Improvável	Improvável	Concordo totalmente	Discordo parcialmente	Concordo totalmente	Concordo totalmente	Discordo parcialmente	Discordo totalmente	Discordo totalmente
114470899055	428177658	2023-11-23 12:02:17	2023-11-23 12:18:56	177.51.61.223					Aceito os termos acima e concordo em participar da pesquisa.	18-25	Masculino	Branca	Ensino Médio completo	Não	Até 1 salário mínimo (R$ 1.320)	Não	Água Claras	Redes Particulares	Não	Não			Depressão					Provável	Provável	Provável	Provável	Muito provável	Provável	Muito provável	Muito provável	Provável	Muito provável	Útil	Útil	Provável	Muito provável	Provável	Concordo parcialmente	Concordo parcialmente	Concordo parcialmente	Concordo totalmente	Discordo totalmente	Discordo totalmente	Discordo parcialmente
114470889056	428177658	2023-11-23 11:58:22	2023-11-23 12:02:06	177.51.61.223					Aceito os termos acima e concordo em participar da pesquisa.	31-35	Masculino	Preta	Superior Incompleto	Sim, sem vínculo empregatício	De 1 a 3 salários mínimos (R$1.320 a R$3.960)	Não	Ceilândia	SUS	Não	Não						Nenhuma condição		Muito provável	Muito provável	Muito provável	Provável	Provável	Muito provável	Provável	Provável	Provável	Provável	Muito Útil	Útil	Provável	Muito provável	Improvável	Concordo totalmente	Discordo parcialmente	Concordo totalmente	Concordo parcialmente	Concordo parcialmente	Discordo totalmente	Discordo parcialmente
114470877498	428177658	2023-11-23 11:26:14	2023-11-23 11:42:41	177.51.61.223					Aceito os termos acima e concordo em participar da pesquisa.	26-30	Masculino	Preta	Superior Completo	Sim, com vínculo empregatício	De 6 a 9 salários mínimos (R$7.920 a R$11.880)	Sim	Água Claras	SUS e Redes Particulares	Não	Não						Nenhuma condição		Improvável	Provável	Provável	Provável	Provável	Improvável	Provável	Provável	Muito provável	Improvável	Útil	Útil	Provável	Muito provável	Improvável	Concordo parcialmente	Concordo parcialmente	Discordo parcialmente	Concordo parcialmente	Concordo parcialmente	Discordo parcialmente	Discordo totalmente
114470866868	428177658	2023-11-23 11:04:54	2023-11-23 11:25:58	177.51.61.223					Aceito os termos acima e concordo em participar da pesquisa.	18-25	Masculino	Branca	Superior Incompleto	Sim, sem vínculo empregatício	De 1 a 3 salários mínimos (R$1.320 a R$3.960)	Não	Água Claras	SUS e Redes Particulares	Não	Não						Nenhuma condição		Provável	Muito provável	Improvável	Provável	Muito provável	Provável	Muito provável	Muito provável	Provável	Improvável	Muito Útil	Inútil	Provável	Improvável	Muito provável	Concordo parcialmente	Discordo parcialmente	Concordo parcialmente	Discordo totalmente	Discordo parcialmente	Concordo parcialmente	Discordo totalmente
114470853999	428177658	2023-11-23 10:57:33	2023-11-23 11:04:34	177.51.61.223					Aceito os termos acima e concordo em participar da pesquisa.	26-30	Masculino	Preta	Ensino Médio completo	Sim, sem vínculo empregatício	De 1 a 3 salários mínimos (R$1.320 a R$3.960)	Sim	Samambaia	SUS	Não	Não							Ansiedade	Provável	Provável	Provável	Provável	Muito provável	Provável	Provável	Provável	Muito provável	Provável	Muito Útil	Útil	Provável	Muito provável	Improvável	Discordo parcialmente	Concordo totalmente	Discordo parcialmente	Discordo parcialmente	Discordo parcialmente	Discordo totalmente	Discordo totalmente
114470841718	428177658	2023-11-23 10:28:47	2023-11-23 10:43:47	177.51.61.223					Aceito os termos acima e concordo em participar da pesquisa.	18-25	Masculino	Branca	Ensino Médio completo	Sim, com vínculo empregatício	De 1 a 3 salários mínimos (R$1.320 a R$3.960)	Não	Ceilândia	SUS e Redes Particulares	Sim	Não						Nenhuma condição		Provável	Provável	Provável	Provável	Muito provável	Improvável	Muito provável	Muito provável	Improvável	Provável	Útil	Muito Útil	Provável	Muito provável	Improvável	Discordo parcialmente	Concordo parcialmente	Concordo parcialmente	Discordo totalmente	Discordo totalmente	Discordo parcialmente	Discordo parcialmente
114470832534	428177658	2023-11-23 10:24:11	2023-11-23 10:28:32	189.40.78.22					Aceito os termos acima e concordo em participar da pesquisa.	18-25	Masculino	Parda	Ensino Médio completo	Não	Até 1 salário mínimo (R$ 1.320)	Não	Taguatinga	SUS e Redes Particulares	Não	Não						Nenhuma condição		Provável	Provável	Improvável	Provável	Muito provável	Provável	Muito provável	Provável	Provável	Improvável	Útil	Útil	Provável	Muito provável	Muito improvável	Concordo parcialmente	Concordo parcialmente	Discordo parcialmente	Concordo totalmente	Discordo totalmente	Discordo totalmente	Discordo totalmente
114470807461	428177658	2023-11-23 09:33:46	2023-11-23 09:46:25	189.40.78.22					Aceito os termos acima e concordo em participar da pesquisa.	36-40	Masculino	Branca	Superior Completo	Sim, com vínculo empregatício	De 3 a 6 salários mínimos (R$3.960 a R$7.920)	Sim	Água Claras	Redes Particulares	Não	Não						Nenhuma condição		Provável	Provável	Provável	Muito provável	Provável	Improvável	Muito provável	Muito provável	Muito provável	Provável	Muito Útil	Muito Útil	Provável	Muito provável	Muito improvável	Concordo parcialmente	Concordo totalmente	Discordo parcialmente	Concordo totalmente	Discordo parcialmente	Discordo totalmente	Discordo totalmente
114470800707	428177658	2023-11-23 09:27:16	2023-11-23 09:33:32	189.40.78.22					Aceito os termos acima e concordo em participar da pesquisa.	50+	Masculino	Branca	Superior Completo	Não	De 3 a 6 salários mínimos (R$3.960 a R$7.920)	Não	Água Claras	Redes Particulares	Sim	Não	Hipertensão/pressão alta	Diabetes						Provável	Provável	Provável	Muito provável	Provável	Provável	Provável	Muito provável	Provável	Provável	Útil	Útil	Muito provável	Muito provável	Improvável	Concordo totalmente	Concordo parcialmente	Concordo parcialmente	Concordo totalmente	Discordo totalmente	Discordo totalmente	Discordo totalmente
114454273105	428177658	2023-11-03 16:48:01	2023-11-03 17:33:19	177.51.61.132					Aceito os termos acima e concordo em participar da pesquisa.	31-35	Masculino	Parda	Superior Completo	Sim, com vínculo empregatício	De 6 a 9 salários mínimos (R$7.920 a R$11.880)	Sim	Água Claras	SUS e Redes Particulares	Não	Não						Nenhuma condição		Improvável	Provável	Provável	Provável	Provável	Muito provável	Provável	Provável	Muito provável	Provável	Muito Útil	Inútil	Provável	Provável	Improvável	Concordo totalmente	Concordo totalmente	Discordo parcialmente	Concordo totalmente	Concordo parcialmente	Discordo totalmente	Discordo totalmente
114454235552	428177658	2023-11-03 16:09:37	2023-11-03 16:47:46	189.40.78.217					Aceito os termos acima e concordo em participar da pesquisa.	50+	Masculino	Parda	Ensino Médio completo	Não	De 6 a 9 salários mínimos (R$7.920 a R$11.880)	Não	Água Claras	Redes Particulares	Não	Não						Nenhuma condição		Provável	Provável	Muito provável	Provável	Provável	Provável	Improvável	Provável	Muito provável	Provável	Muito Útil	Inútil	Provável	Provável	Provável	Discordo parcialmente	Concordo parcialmente	Discordo parcialmente	Concordo parcialmente	Discordo parcialmente	Discordo parcialmente	Discordo parcialmente
114454200646	428177658	2023-11-03 15:44:24	2023-11-03 16:08:41	138.0.244.184					Aceito os termos acima e concordo em participar da pesquisa.	18-25	Masculino	Branca	Superior Incompleto	Não	Até 1 salário mínimo (R$ 1.320)	Não	Arniqueira	Redes Particulares	Não	Não						Nenhuma condição		Provável	Provável	Provável	Provável	Provável	Muito provável	Provável	Provável	Muito provável	Improvável	Útil	Inútil	Provável	Provável	Provável	Discordo parcialmente	Concordo parcialmente	Concordo parcialmente	Concordo parcialmente	Discordo parcialmente	Discordo totalmente	Discordo parcialmente
114454177039	428177658	2023-11-03 15:08:53	2023-11-03 15:44:11	138.0.244.184					Aceito os termos acima e concordo em participar da pesquisa.	31-35	Feminino	Branca	Superior Completo	Sim, com vínculo empregatício	De 6 a 9 salários mínimos (R$7.920 a R$11.880)	Sim	Água Claras	Redes Particulares	Sim	Não						Nenhuma condição		Provável	Muito provável	Provável	Improvável	Provável	Provável	Provável	Improvável	Improvável	Improvável	Útil	Útil	Provável	Provável	Improvável	Concordo parcialmente	Discordo parcialmente	Concordo parcialmente	Concordo parcialmente	Concordo parcialmente	Discordo totalmente	Discordo totalmente
114454142327	428177658	2023-11-03 14:23:19	2023-11-03 15:08:41	138.0.244.184					Aceito os termos acima e concordo em participar da pesquisa.	26-30	Feminino	Branca	Superior Completo	Sim, com vínculo empregatício	De 1 a 3 salários mínimos (R$1.320 a R$3.960)	Não	Recanto Das Emas	SUS	Não	Não						Nenhuma condição		Provável	Provável	Provável	Improvável	Provável	Provável	Provável	Muito provável	Improvável	Provável	Útil	Útil	Provável	Provável	Improvável	Concordo parcialmente	Concordo parcialmente	Discordo totalmente	Concordo totalmente	Concordo parcialmente	Concordo parcialmente	Discordo parcialmente
114454105556	428177658	2023-11-03 14:15:15	2023-11-03 14:35:27	138.0.244.184					Aceito os termos acima e concordo em participar da pesquisa.	50+	Masculino	Branca	Superior Completo	Não	De 6 a 9 salários mínimos (R$7.920 a R$11.880)	Não	Samambaia	SUS e Redes Particulares	Sim	Não	Hipertensão/pressão alta							Improvável	Provável	Provável	Provável	Provável	Improvável	Muito provável	Muito provável	Provável	Muito provável	Útil	Inútil	Provável	Muito provável	Provável	Concordo totalmente	Concordo parcialmente	Concordo parcialmente	Concordo parcialmente	Discordo parcialmente	Concordo parcialmente	Discordo totalmente
114454092699	428177658	2023-11-03 14:00:02	2023-11-03 14:23:08	189.40.78.230					Aceito os termos acima e concordo em participar da pesquisa.	36-40	Masculino	Branca	Ensino Médio completo	Sim, com vínculo empregatício	De 3 a 6 salários mínimos (R$3.960 a R$7.920)	Não	Taguatinga	SUS e Redes Particulares	Não	Não						Nenhuma condição		Provável	Provável	Provável	Muito provável	Muito provável	Improvável	Provável	Muito provável	Muito provável	Muito improvável	Útil	Útil	Provável	Provável	Improvável	Concordo parcialmente	Concordo parcialmente	Discordo parcialmente	Concordo parcialmente	Discordo parcialmente	Discordo parcialmente	Discordo parcialmente
114454067034	428177658	2023-11-03 13:37:58	2023-11-03 13:59:43	189.40.78.230					Aceito os termos acima e concordo em participar da pesquisa.	36-40	Masculino	Branca	Superior Completo	Sim, com vínculo empregatício	De 10 a 20 salários mínimos (R$13.200 a R$26.400)	Não	Água Claras	Redes Particulares	Não	Não						Nenhuma condição		Provável	Muito provável	Provável	Improvável	Improvável	Provável	Muito provável	Improvável	Muito provável	Provável	Útil	Útil	Muito provável	Provável	Muito improvável	Concordo parcialmente	Concordo totalmente	Concordo parcialmente	Concordo totalmente	Concordo parcialmente	Discordo totalmente	Discordo parcialmente
114454043228	428177658	2023-11-03 13:31:49	2023-11-03 13:37:38	189.40.76.216					Aceito os termos acima e concordo em participar da pesquisa.	26-50	Masculino	Parda	Ensino Médio completo	Sim, sem vínculo empregatício	De 6 a 9 salários mínimos (R$7.920 a R$11.880)	Não	Arniqueira	Redes Particulares	Sim	Não						Nenhuma condição		Muito provável	Provável	Muito provável	Provável	Provável	Provável	Muito provável	Provável	Muito provável	Provável	Muito Útil	Útil	Provável	Provável	Improvável	Concordo totalmente	Concordo parcialmente	Concordo totalmente	Concordo parcialmente	Discordo totalmente	Discordo totalmente	Discordo totalmente
114453957436	428177658	2023-11-03 11:58:50	2023-11-03 12:18:29	189.40.76.216					Aceito os termos acima e concordo em participar da pesquisa.	31-35	Masculino	Parda	Superior Incompleto	Sim, com vínculo empregatício	De 1 a 3 salários mínimos (R$1.320 a R$3.960)	Não	Ceilândia	SUS	Não	Não						Nenhuma condição		Provável	Provável	Improvável	Provável	Provável	Provável	Muito provável	Provável	Provável	Improvável	Muito Útil	Útil	Provável	Provável	Improvável	Concordo parcialmente	Concordo parcialmente	Discordo parcialmente	Concordo parcialmente	Discordo parcialmente	Concordo parcialmente	Discordo totalmente
114453936509	428177658	2023-11-03 11:47:09	2023-11-03 11:58:07	189.40.76.216					Aceito os termos acima e concordo em participar da pesquisa.	31-35	Feminino	Parda	Superior Completo	Sim, sem vínculo empregatício	De 3 a 6 salários mínimos (R$3.960 a R$7.920)	Sim	Água Claras	Redes Particulares	Não	Não						Nenhuma condição		Improvável	Provável	Improvável	Provável	Provável	Improvável	Muito provável	Provável	Provável	Provável	Muito Útil	Inútil	Muito provável	Muito provável	Muito improvável	Concordo totalmente	Concordo parcialmente	Discordo parcialmente	Concordo totalmente	Discordo parcialmente	Discordo totalmente	Discordo parcialmente
114453924661	428177658	2023-11-03 11:35:56	2023-11-03 11:46:34	189.40.76.216					Aceito os termos acima e concordo em participar da pesquisa.	26-50	Masculino	Branca	Superior Completo	Sim, com vínculo empregatício	De 10 a 20 salários mínimos (R$13.200 a R$26.400)	Não	Água Claras	Redes Particulares	Não	Não						Nenhuma condição		Improvável	Provável	Improvável	Provável	Muito provável	Improvável	Provável	Provável	Improvável	Improvável	Muito Útil	Inútil	Muito provável	Provável	Improvável	Concordo totalmente	Discordo parcialmente	Discordo parcialmente	Concordo totalmente	Concordo parcialmente	Discordo totalmente	Discordo parcialmente
114453912756	428177658	2023-11-03 11:24:57	2023-11-03 11:35:20	189.40.76.216					Aceito os termos acima e concordo em participar da pesquisa.	26-30	Masculino	Branca	Superior Completo	Não	De 1 a 3 salários mínimos (R$1.320 a R$3.960)	Não	Água Claras	Redes Particulares	Não	Não			Depressão					Muito provável	Muito provável	Muito provável	Provável	Provável	Muito provável	Muito provável	Provável	Muito provável	Provável	Muito Útil	Útil	Provável	Provável	Muito improvável	Concordo parcialmente	Concordo totalmente	Discordo parcialmente	Concordo parcialmente	Discordo totalmente	Discordo totalmente	Discordo parcialmente
114453899724	428177658	2023-11-03 11:11:04	2023-11-03 11:23:53	189.40.76.216					Aceito os termos acima e concordo em participar da pesquisa.	31-35	Masculino	Branca	Superior Completo	Sim, com vínculo empregatício	De 6 a 9 salários mínimos (R$7.920 a R$11.880)	Não	Park Way	Redes Particulares	Não	Não						Nenhuma condição		Provável	Muito provável	Provável	Provável	Muito provável	Provável	Muito provável	Provável	Muito provável	Improvável	Útil	Muito Útil	Provável	Muito provável	Improvável	Discordo parcialmente	Concordo parcialmente	Discordo totalmente	Concordo parcialmente	Discordo totalmente	Discordo totalmente	Não concordo nem discordo
114453880457	428177658	2023-11-03 11:01:11	2023-11-03 11:10:19	189.40.76.216					Aceito os termos acima e concordo em participar da pesquisa.	26-30	Masculino	Preta	Superior Completo	Sim, sem vínculo empregatício	De 3 a 6 salários mínimos (R$3.960 a R$7.920)	Não	Samambaia	Redes Particulares	Não	Não						Nenhuma condição		Provável	Provável	Provável	Muito provável	Muito provável	Provável	Muito provável	Provável	Muito provável	Provável	Muito Útil	Útil	Muito provável	Provável	Provável	Concordo parcialmente	Concordo totalmente	Discordo parcialmente	Concordo parcialmente	Discordo parcialmente	Discordo totalmente	Discordo totalmente
114453866083	428177658	2023-11-03 10:45:48	2023-11-03 11:00:20	189.40.76.216					Aceito os termos acima e concordo em participar da pesquisa.	26-50	Feminino	Branca	Ensino Médio completo	Sim, com vínculo empregatício	De 3 a 6 salários mínimos (R$3.960 a R$7.920)	Não	Taguatinga	Redes Particulares	Sim	Não	Hipertensão/pressão alta					Nenhuma condição		Provável	Provável	Provável	Improvável	Provável	Provável	Provável	Muito provável	Muito provável	Provável	Útil	Útil	Provável	Provável	Provável	Discordo parcialmente	Concordo parcialmente	Concordo totalmente	Concordo parcialmente	Discordo parcialmente	Discordo totalmente	Discordo totalmente
114453851544	428177658	2023-11-03 10:32:43	2023-11-03 10:45:20	189.40.76.216					Aceito os termos acima e concordo em participar da pesquisa.	18-25	Masculino	Parda	Superior Incompleto	Sim, sem vínculo empregatício	De 1 a 3 salários mínimos (R$1.320 a R$3.960)	Não	Água Claras	Redes Particulares	Não	Não						Nenhuma condição		Provável	Provável	Improvável	Muito provável	Provável	Provável	Muito provável	Provável	Provável	Improvável	Útil	Muito Útil	Provável	Muito provável	Improvável	Concordo parcialmente	Concordo totalmente	Concordo parcialmente	Concordo parcialmente	Discordo parcialmente	Discordo totalmente	Discordo totalmente
114453838538	428177658	2023-11-03 10:20:07	2023-11-03 10:32:03	189.40.76.216					Aceito os termos acima e concordo em participar da pesquisa.	26-50	Masculino	Branca	Superior Completo	Sim, com vínculo empregatício	De 6 a 9 salários mínimos (R$7.920 a R$11.880)	Não	Arniqueira	Redes Particulares	Não	Não						Nenhuma condição		Provável	Provável	Muito improvável	Improvável	Provável	Provável	Provável	Muito provável	Improvável	Provável	Útil	Útil	Provável	Muito provável	Improvável	Concordo parcialmente	Concordo parcialmente	Concordo parcialmente	Concordo totalmente	Concordo parcialmente	Discordo totalmente	Discordo parcialmente
114453826325	428177658	2023-11-03 10:08:44	2023-11-03 10:19:18	189.40.76.216					Aceito os termos acima e concordo em participar da pesquisa.	50+	Masculino	Branca	Superior Completo	Sim, sem vínculo empregatício	Mais de 20 salários mínimos ( mais de R$26.400)	Não	Park Way	Redes Particulares	Não	Não						Nenhuma condição		Muito improvável	Provável	Provável	Improvável	Provável	Improvável	Muito provável	Improvável	Improvável	Muito provável	Útil	Útil	Improvável	Improvável	Improvável	Concordo totalmente	Concordo parcialmente	Concordo totalmente	Concordo totalmente	Discordo totalmente	Discordo parcialmente	Concordo parcialmente
114453815481	428177658	2023-11-03 09:48:28	2023-11-03 10:07:59	189.40.76.216					Aceito os termos acima e concordo em participar da pesquisa.	31-35	Masculino	Branca	Superior Completo	Sim, com vínculo empregatício	De 6 a 9 salários mínimos (R$7.920 a R$11.880)	Sim	Taguatinga	SUS e Redes Particulares	Não	Não						Nenhuma condição		Improvável	Provável	Provável	Provável	Provável	Provável	Muito provável	Improvável	Provável	Provável	Útil	Útil	Improvável	Provável	Improvável	Concordo parcialmente	Concordo parcialmente	Discordo parcialmente	Discordo parcialmente	Discordo totalmente	Discordo totalmente	Discordo totalmente
114453797920	428177658	2023-11-03 09:44:46	2023-11-03 09:48:06	189.40.76.216					Aceito os termos acima e concordo em participar da pesquisa.	50+	Masculino	Branca	Superior Completo	Não	De 6 a 9 salários mínimos (R$7.920 a R$11.880)	Não	Água Claras	Redes Particulares	Sim	Não	Hipertensão/pressão alta							Provável	Muito provável	Provável	Improvável	Provável	Provável	Muito provável	Muito provável	Muito provável	Improvável	Muito Útil	Útil	Provável	Muito provável	Improvável	Concordo totalmente	Concordo parcialmente	Discordo parcialmente	Concordo totalmente	Discordo parcialmente	Discordo totalmente	Discordo parcialmente
114446596202	428177658	2023-10-25 23:57:51	2023-10-26 00:07:11	104.28.63.98					Aceito os termos acima e concordo em participar da pesquisa.	26-30	Feminino	Branca	Superior Completo	Sim, sem vínculo empregatício	De 3 a 6 salários mínimos (R$3.960 a R$7.920)	Não	Taguatinga	SUS e Redes Particulares	Não	Não							ansiedade	Provável	Provável	Provável	Muito provável	Muito provável	Provável	Provável	Provável	Provável	Improvável	Muito Útil	Inútil	Muito provável	Muito provável	Muito improvável	Concordo totalmente	Concordo totalmente	Concordo parcialmente	Concordo totalmente	Discordo totalmente	Discordo totalmente	Discordo totalmente
114446590455	428177658	2023-10-25 23:46:11	2023-10-25 23:54:13	104.28.63.97					Aceito os termos acima e concordo em participar da pesquisa.	26-30	Prefiro não declarar	Branca	Superior Completo	Sim, sem vínculo empregatício	De 1 a 3 salários mínimos (R$1.320 a R$3.960)	Não	Taguatinga	SUS e Redes Particulares	Não	Não						Nenhuma condição		Improvável	Improvável	Muito improvável	Provável	Provável	Provável	Muito provável	Provável	Improvável	Provável	Muito Útil	Muito Inútil	Muito improvável	Provável	Muito improvável	Concordo parcialmente	Discordo parcialmente	Discordo parcialmente	Concordo totalmente	Não concordo nem discordo	Discordo totalmente	Discordo totalmente
114446372436	428177658	2023-10-25 17:33:51	2023-10-25 17:51:02	189.40.76.195					Aceito os termos acima e concordo em participar da pesquisa.	18-25	Feminino	Branca	Superior Incompleto	Não	Até 1 salário mínimo (R$ 1.320)	Não	Arniqueira	Redes Particulares	Não	Não						Nenhuma condição		Provável	Provável	Improvável	Improvável	Muito provável	Muito provável	Improvável	Improvável	Improvável	Muito provável	Útil	Muito Útil	Provável	Muito provável	Improvável	Concordo parcialmente	Concordo totalmente	Concordo parcialmente	Concordo totalmente	Concordo totalmente	Discordo parcialmente	Discordo parcialmente
114446359009	428177658	2023-10-25 17:17:47	2023-10-25 17:33:40	189.40.76.195					Aceito os termos acima e concordo em participar da pesquisa.	36-40	Masculino	Preta	Ensino Médio completo	Sim, com vínculo empregatício	De 1 a 3 salários mínimos (R$1.320 a R$3.960)	Não	Vicente Pires	SUS	Não	Não						Nenhuma condição		Provável	Provável	Provável	Provável	Provável	Provável	Provável	Muito provável	Improvável	Improvável	Útil	Muito Útil	Provável	Provável	Provável	Discordo parcialmente	Discordo parcialmente	Concordo parcialmente	Discordo parcialmente	Concordo parcialmente	Concordo parcialmente	Não concordo nem discordo
114446346303	428177658	2023-10-25 16:54:23	2023-10-25 17:17:16	189.40.76.195					Aceito os termos acima e concordo em participar da pesquisa.	26-50	Masculino	Parda	Ensino Médio completo	Sim, sem vínculo empregatício	De 3 a 6 salários mínimos (R$3.960 a R$7.920)	Não	Água Claras	Redes Particulares	Sim	Não	Hipertensão/pressão alta							Provável	Provável	Improvável	Improvável	Provável	Improvável	Provável	Improvável	Provável	Improvável	Muito Útil	Útil	Provável	Muito provável	Improvável	Concordo parcialmente	Concordo parcialmente	Discordo parcialmente	Não concordo nem discordo	Discordo parcialmente	Discordo totalmente	Discordo parcialmente
114446326647	428177658	2023-10-25 16:37:28	2023-10-25 16:54:11	189.40.76.195					Aceito os termos acima e concordo em participar da pesquisa.	36-40	Feminino	Branca	Superior Completo	Sim, com vínculo empregatício	De 3 a 6 salários mínimos (R$3.960 a R$7.920)	Não	Park Way	Redes Particulares	Não	Não						Nenhuma condição		Provável	Provável	Provável	Provável	Provável	Provável	Provável	Provável	Provável	Improvável	Útil	Inútil	Provável	Provável	Improvável	Concordo parcialmente	Concordo parcialmente	Concordo totalmente	Concordo parcialmente	Discordo totalmente	Discordo totalmente	Discordo totalmente
114446312076	428177658	2023-10-25 16:21:09	2023-10-25 16:37:15	189.40.76.195					Aceito os termos acima e concordo em participar da pesquisa.	41-45	Feminino	Branca	Superior Completo	Sim, com vínculo empregatício	De 3 a 6 salários mínimos (R$3.960 a R$7.920)	Não	Taguatinga	Redes Particulares	Não	Não						Nenhuma condição		Provável	Provável	Provável	Muito provável	Muito provável	Provável	Muito provável	Muito provável	Muito provável	Improvável	Muito Útil	Inútil	Muito provável	Muito provável	Muito improvável	Concordo totalmente	Concordo totalmente	Discordo parcialmente	Concordo totalmente	Discordo totalmente	Discordo totalmente	Discordo totalmente
114446296956	428177658	2023-10-25 16:04:36	2023-10-25 16:20:49	189.40.76.195					Aceito os termos acima e concordo em participar da pesquisa.	36-40	Feminino	Parda	Ensino Médio completo	Sim, com vínculo empregatício	De 1 a 3 salários mínimos (R$1.320 a R$3.960)	Não	Ceilândia	SUS e Redes Particulares	Não	Não						Nenhuma condição		Provável	Muito provável	Muito provável	Provável	Provável	Provável	Muito provável	Muito provável	Provável	Improvável	Muito Útil	Muito Útil	Muito provável	Provável	Provável	Discordo parcialmente	Concordo totalmente	Concordo parcialmente	Concordo parcialmente	Discordo parcialmente	Concordo parcialmente	Discordo totalmente
114446282063	428177658	2023-10-25 15:47:28	2023-10-25 16:04:23	189.40.76.195					Aceito os termos acima e concordo em participar da pesquisa.	41-45	Masculino	Branca	Superior Completo	Sim, sem vínculo empregatício	De 6 a 9 salários mínimos (R$7.920 a R$11.880)	Não	Água Claras	Redes Particulares	Não	Não						Nenhuma condição		Improvável	Provável	Improvável	Provável	Provável	Provável	Provável	Muito provável	Improvável	Improvável	Útil	Útil	Provável	Provável	Improvável	Concordo totalmente	Concordo parcialmente	Concordo parcialmente	Concordo totalmente	Discordo parcialmente	Discordo totalmente	Discordo parcialmente
114446266159	428177658	2023-10-25 15:35:00	2023-10-25 15:47:14	189.40.76.192					Aceito os termos acima e concordo em participar da pesquisa.	18-25	Feminino	Parda	Superior Incompleto	Não	Até 1 salário mínimo (R$ 1.320)	Não	Arniqueira	Redes Particulares	Não	Não						Nenhuma condição		Provável	Muito provável	Muito provável	Muito provável	Provável	Provável	Muito provável	Provável	Muito provável	Improvável	Útil	Muito Útil	Provável	Provável	Provável	Concordo parcialmente	Concordo parcialmente	Concordo parcialmente	Concordo parcialmente	Discordo totalmente	Discordo totalmente	Discordo totalmente
114446254400	428177658	2023-10-25 15:07:35	2023-10-25 15:34:40	189.40.76.192					Aceito os termos acima e concordo em participar da pesquisa.	36-40	Feminino	Branca	Superior Completo	Sim, com vínculo empregatício	De 1 a 3 salários mínimos (R$1.320 a R$3.960)	Não	Park Way	Redes Particulares	Não	Não						Nenhuma condição		Provável	Provável	Provável	Muito provável	Provável	Provável	Provável	Muito provável	Improvável	Improvável	Muito Útil	Útil	Provável	Provável	Improvável	Não concordo nem discordo	Concordo parcialmente	Discordo parcialmente	Não concordo nem discordo	Discordo totalmente	Discordo totalmente	Discordo totalmente
114446248683	428177658	2023-10-25 15:25:32	2023-10-25 15:28:36	177.174.208.75					Aceito os termos acima e concordo em participar da pesquisa.	31-35	Feminino	Branca	Superior Completo	Sim, com vínculo empregatício	De 6 a 9 salários mínimos (R$7.920 a R$11.880)	Não	Taguatinga	SUS e Redes Particulares	Não	Não		Diabetes						Provável	Provável	Provável	Provável	Provável	Provável	Provável	Muito provável	Muito provável	Improvável	Muito Útil	Muito Útil	Provável	Muito provável	Provável	Concordo parcialmente	Não concordo nem discordo	Concordo parcialmente	Concordo parcialmente	Discordo parcialmente	Discordo totalmente	Discordo totalmente
114446228803	428177658	2023-10-25 14:43:22	2023-10-25 15:07:23	189.40.76.192					Aceito os termos acima e concordo em participar da pesquisa.	36-40	Feminino	Branca	Superior Completo	Sim, com vínculo empregatício	De 6 a 9 salários mínimos (R$7.920 a R$11.880)	Não	Água Claras	Redes Particulares	Não	Não						Nenhuma condição		Provável	Provável	Improvável	Provável	Provável	Provável	Muito provável	Provável	Provável	Provável	Muito Útil	Inútil	Muito provável	Muito provável	Improvável	Concordo parcialmente	Concordo parcialmente	Concordo parcialmente	Concordo totalmente	Discordo parcialmente	Discordo totalmente	Discordo totalmente
114446204163	428177658	2023-10-25 14:30:03	2023-10-25 14:43:03	189.40.76.192					Aceito os termos acima e concordo em participar da pesquisa.	31-35	Masculino	Parda	Ensino Médio completo	Sim, sem vínculo empregatício	De 1 a 3 salários mínimos (R$1.320 a R$3.960)	Não	São Sebastião	SUS e Redes Particulares	Não	Não						Nenhuma condição		Provável	Provável	Muito provável	Provável	Muito improvável	Improvável	Provável	Muito provável	Muito provável	Improvável	Muito Útil	Muito Útil	Improvável	Muito provável	Provável	Concordo parcialmente	Concordo totalmente	Concordo totalmente	Concordo totalmente	Discordo totalmente	Concordo totalmente	Discordo totalmente
114446190054	428177658	2023-10-25 14:13:20	2023-10-25 14:29:52	189.40.76.192					Aceito os termos acima e concordo em participar da pesquisa.	26-50	Feminino	Branca	Ensino Médio completo	Sim, com vínculo empregatício	De 1 a 3 salários mínimos (R$1.320 a R$3.960)	Sim	Sol Nascente/Pôr do Sol	SUS	Sim	Não	Hipertensão/pressão alta							Provável	Provável	Muito provável	Muito provável	Provável	Provável	Muito provável	Improvável	Provável	Muito provável	Útil	Inútil	Provável	Provável	Improvável	Concordo totalmente	Concordo totalmente	Concordo totalmente	Concordo totalmente	Concordo totalmente	Discordo totalmente	Discordo totalmente
114446172521	428177658	2023-10-25 12:51:48	2023-10-25 14:13:03	189.40.76.192					Aceito os termos acima e concordo em participar da pesquisa.	18-25	Feminino	Parda	Superior Completo	Sim, sem vínculo empregatício	De 1 a 3 salários mínimos (R$1.320 a R$3.960)	Não	Riacho Fundo	Redes Particulares	Não	Não						Nenhuma condição		Improvável	Muito provável	Provável	Provável	Muito provável	Provável	Muito provável	Muito provável	Provável	Improvável	Útil	Muito Útil	Muito provável	Muito provável	Improvável	Concordo totalmente	Concordo totalmente	Não concordo nem discordo	Concordo totalmente	Concordo parcialmente	Discordo totalmente	Discordo totalmente
114446089458	428177658	2023-10-25 12:33:42	2023-10-25 12:51:30	189.40.76.177					Aceito os termos acima e concordo em participar da pesquisa.	50+	Feminino	Parda	Superior Completo	Não	De 6 a 9 salários mínimos (R$7.920 a R$11.880)	Não	Água Claras	Redes Particulares	Não	Não						Nenhuma condição		Provável	Muito provável	Provável	Provável	Muito provável	Provável	Provável	Muito provável	Provável	Muito provável	Muito Útil	Útil	Provável	Provável	Improvável	Concordo parcialmente	Discordo parcialmente	Discordo parcialmente	Concordo totalmente	Discordo parcialmente	Discordo totalmente	Discordo totalmente
114446071318	428177658	2023-10-25 12:24:55	2023-10-25 12:33:30	189.40.76.177					Aceito os termos acima e concordo em participar da pesquisa.	26-30	Feminino	Branca	Superior Incompleto	Sim, com vínculo empregatício	De 1 a 3 salários mínimos (R$1.320 a R$3.960)	Não	Guará	SUS e Redes Particulares	Não	Não						Nenhuma condição		Provável	Muito provável	Improvável	Provável	Provável	Provável	Provável	Provável	Muito provável	Improvável	Muito Útil	Muito Útil	Provável	Provável	Muito improvável	Concordo parcialmente	Concordo totalmente	Concordo parcialmente	Concordo parcialmente	Discordo totalmente	Discordo totalmente	Discordo totalmente
114446061544	428177658	2023-10-25 12:14:26	2023-10-25 12:24:11	189.40.76.177					Aceito os termos acima e concordo em participar da pesquisa.	18-25	Feminino	Branca	Superior Completo	Sim, com vínculo empregatício	De 1 a 3 salários mínimos (R$1.320 a R$3.960)	Não	Riacho Fundo 2	Redes Particulares	Não	Não							Ansiedade	Muito provável	Muito provável	Provável	Muito provável	Muito provável	Muito provável	Provável	Provável	Muito provável	Improvável	Útil	Muito Inútil	Muito provável	Provável	Improvável	Concordo totalmente	Concordo totalmente	Discordo totalmente	Concordo totalmente	Discordo parcialmente	Discordo parcialmente	Discordo totalmente
114446051060	428177658	2023-10-25 11:59:40	2023-10-25 12:14:07	189.40.76.177					Aceito os termos acima e concordo em participar da pesquisa.	26-30	Feminino	Parda	Superior Completo	Sim, com vínculo empregatício	De 1 a 3 salários mínimos (R$1.320 a R$3.960)	Não	Ceilândia	SUS e Redes Particulares	Não	Não						Nenhuma condição		Provável	Provável	Provável	Provável	Provável	Provável	Provável	Muito provável	Improvável	Muito provável	Útil	Muito Útil	Provável	Provável	Provável	Concordo totalmente	Concordo parcialmente	Discordo totalmente	Concordo parcialmente	Discordo parcialmente	Discordo totalmente	Discordo totalmente
114446034820	428177658	2023-10-25 11:35:58	2023-10-25 11:59:20	189.40.76.177					Aceito os termos acima e concordo em participar da pesquisa.	26-30	Feminino	Branca	Superior Completo	Sim, sem vínculo empregatício	De 3 a 6 salários mínimos (R$3.960 a R$7.920)	Não	Park Way	Redes Particulares	Não	Não						Nenhuma condição		Provável	Muito provável	Provável	Muito provável	Muito provável	Provável	Muito provável	Provável	Improvável	Improvável	Muito Útil	Útil	Provável	Muito provável	Improvável	Concordo parcialmente	Concordo parcialmente	Discordo parcialmente	Concordo parcialmente	Discordo parcialmente	Discordo totalmente	Discordo totalmente
114446024929	428177658	2023-10-25 11:36:13	2023-10-25 11:49:46	201.2.7.61					Aceito os termos acima e concordo em participar da pesquisa.	26-50	Feminino	Branca	Superior Incompleto	Sim, com vínculo empregatício	De 3 a 6 salários mínimos (R$3.960 a R$7.920)	Não	Água Claras	Redes Particulares	Sim	Não							Xx	Muito provável	Provável	Muito provável	Muito provável	Muito provável	Provável	Muito provável	Provável	Improvável	Improvável	Muito Útil	Muito Útil	Muito improvável	Muito improvável	Muito improvável	Concordo totalmente	Concordo parcialmente	Discordo totalmente	Concordo parcialmente	Concordo totalmente	Discordo totalmente	Discordo totalmente
114446009616	428177658	2023-10-25 11:17:03	2023-10-25 11:34:56	189.40.76.177					Aceito os termos acima e concordo em participar da pesquisa.	18-25	Feminino	Branca	Superior Incompleto	Sim, com vínculo empregatício	De 1 a 3 salários mínimos (R$1.320 a R$3.960)	Não	Arniqueira	Redes Particulares	Não	Não						Nenhuma condição		Provável	Muito provável	Provável	Muito provável	Muito provável	Muito provável	Muito provável	Muito provável	Muito provável	Improvável	Útil	Útil	Provável	Muito provável	Improvável	Concordo parcialmente	Concordo totalmente	Discordo parcialmente	Concordo parcialmente	Discordo totalmente	Discordo totalmente	Discordo totalmente
114445991828	428177658	2023-10-25 11:05:39	2023-10-25 11:16:43	189.40.76.177					Aceito os termos acima e concordo em participar da pesquisa.	31-35	Feminino	Branca	Superior Completo	Sim, sem vínculo empregatício	De 3 a 6 salários mínimos (R$3.960 a R$7.920)	Não	Água Claras	Redes Particulares	Não	Não						Nenhuma condição		Provável	Provável	Provável	Provável	Muito provável	Provável	Muito provável	Muito provável	Muito provável	Improvável	Muito Útil	Útil	Improvável	Provável	Improvável	Discordo parcialmente	Discordo parcialmente	Discordo totalmente	Concordo parcialmente	Discordo totalmente	Discordo totalmente	Discordo totalmente
114445980363	428177658	2023-10-25 10:53:26	2023-10-25 11:05:22	189.40.76.177					Aceito os termos acima e concordo em participar da pesquisa.	18-25	Masculino	Parda	Ensino Médio completo	Sim, sem vínculo empregatício	De 1 a 3 salários mínimos (R$1.320 a R$3.960)	Sim	Samambaia	SUS e Redes Particulares	Não	Não						Nenhuma condição		Provável	Improvável	Provável	Provável	Muito provável	Muito improvável	Provável	Provável	Provável	Provável	Útil	Inútil	Provável	Provável	Improvável	Discordo parcialmente	Discordo parcialmente	Concordo parcialmente	Não concordo nem discordo	Discordo totalmente	Discordo parcialmente	Discordo totalmente
114445968014	428177658	2023-10-25 10:38:25	2023-10-25 10:52:45	189.40.76.177					Aceito os termos acima e concordo em participar da pesquisa.	36-40	Feminino	Branca	Superior Completo	Sim, sem vínculo empregatício	De 1 a 3 salários mínimos (R$1.320 a R$3.960)	Não	Água Claras	Redes Particulares	Sim	Não			Depressão					Provável	Muito provável	Provável	Provável	Provável	Provável	Provável	Provável	Muito improvável	Provável	Útil	Útil	Improvável	Provável	Improvável	Concordo totalmente	Concordo parcialmente	Discordo parcialmente	Concordo parcialmente	Discordo parcialmente	Discordo parcialmente	Discordo totalmente
114445954006	428177658	2023-10-25 10:26:25	2023-10-25 10:38:06	189.40.76.177					Aceito os termos acima e concordo em participar da pesquisa.	18-25	Masculino	Branca	Ensino Médio completo	Não	Até 1 salário mínimo (R$ 1.320)	Não	Água Claras	SUS e Redes Particulares	Não	Não						Nenhuma condição		Provável	Provável	Provável	Provável	Muito provável	Provável	Muito provável	Provável	Muito provável	Improvável	Muito Útil	Muito Útil	Muito provável	Improvável	Improvável	Discordo parcialmente	Concordo totalmente	Concordo totalmente	Concordo totalmente	Discordo totalmente	Discordo totalmente	Discordo totalmente
114445942186	428177658	2023-10-25 10:00:58	2023-10-25 10:25:38	189.40.76.177					Aceito os termos acima e concordo em participar da pesquisa.	50+	Masculino	Branca	Ensino Médio completo	Não	De 6 a 9 salários mínimos (R$7.920 a R$11.880)	Não	Água Claras	Redes Particulares	Sim	Não				Doenças cardiovasculares como infarto, derrame ou insuficiência cardíaca			Colesterol	Improvável	Provável	Provável	Improvável	Provável	Improvável	Provável	Provável	Provável	Muito provável	Muito Inútil	Útil	Provável	Provável	Provável	Discordo parcialmente	Concordo totalmente	Concordo totalmente	Concordo totalmente	Discordo totalmente	Discordo totalmente	Discordo totalmente
114445941683	428177658	2023-10-25 10:12:10	2023-10-25 10:25:04	177.174.213.10					Aceito os termos acima e concordo em participar da pesquisa.	26-50	Feminino	Branca	Superior Completo	Sim, com vínculo empregatício	De 1 a 3 salários mínimos (R$1.320 a R$3.960)	Não	Riacho Fundo	SUS e Redes Particulares	Sim	Não			Depressão					Provável	Muito provável	Provável	Provável	Provável	Provável	Provável	Provável	Muito provável	Provável	Muito Útil	Inútil	Provável	Provável	Provável	Concordo totalmente	Concordo parcialmente	Discordo parcialmente	Concordo parcialmente	Discordo totalmente	Discordo totalmente	Discordo totalmente
114445918447	428177658	2023-10-25 09:40:41	2023-10-25 10:00:45	189.40.76.177					Aceito os termos acima e concordo em participar da pesquisa.	26-50	Feminino	Parda	Fundamental incompleto	Sim, com vínculo empregatício	De 1 a 3 salários mínimos (R$1.320 a R$3.960)	Não	Ceilândia	SUS	Não	Não						Nenhuma condição		Improvável	Muito provável	Provável	Provável	Provável	Provável	Provável	Provável	Provável	Provável	Útil	Útil	Provável	Muito provável	Provável	Concordo parcialmente	Discordo parcialmente	Concordo parcialmente	Concordo totalmente	Concordo totalmente	Concordo parcialmente	Discordo totalmente
114445387955	428177658	2023-10-24 18:21:22	2023-10-24 18:33:13	177.51.63.13					Aceito os termos acima e concordo em participar da pesquisa.	26-30	Feminino	Parda	Superior Incompleto	Não	Até 1 salário mínimo (R$ 1.320)	Não	Plano Piloto	SUS e Redes Particulares	Não	Não						Nenhuma condição		Provável	Improvável	Provável	Muito provável	Muito provável	Provável	Muito provável	Muito provável	Improvável	Improvável	Muito Útil	Útil	Muito provável	Provável	Provável	Concordo parcialmente	Concordo parcialmente	Concordo parcialmente	Concordo parcialmente	Discordo totalmente	Discordo totalmente	Discordo totalmente
114445379056	428177658	2023-10-24 18:06:01	2023-10-24 18:21:10	177.51.63.13					Aceito os termos acima e concordo em participar da pesquisa.	18-25	Feminino	Branca	Superior Incompleto	Não	De 1 a 3 salários mínimos (R$1.320 a R$3.960)	Não	Plano Piloto	SUS e Redes Particulares	Não	Não						Nenhuma condição		Provável	Provável	Muito provável	Muito provável	Provável	Muito provável	Provável	Improvável	Provável	Improvável	Útil	Muito Inútil	Muito provável	Improvável	Improvável	Não concordo nem discordo	Não concordo nem discordo	Concordo parcialmente	Discordo parcialmente	Concordo parcialmente	Concordo parcialmente	Concordo parcialmente
114445367093	428177658	2023-10-24 17:49:21	2023-10-24 18:05:22	177.51.63.100					Aceito os termos acima e concordo em participar da pesquisa.	18-25	Feminino	Parda	Superior Incompleto	Não	Até 1 salário mínimo (R$ 1.320)	Não	Núcleo Bandeirante	Redes Particulares	Não	Não						Nenhuma condição		Provável	Provável	Muito provável	Provável	Muito provável	Provável	Muito provável	Muito provável	Muito provável	Improvável	Muito Útil	Útil	Provável	Improvável	Provável	Concordo parcialmente	Concordo totalmente	Concordo totalmente	Concordo parcialmente	Concordo parcialmente	Discordo parcialmente	Discordo totalmente
114445354189	428177658	2023-10-24 17:41:44	2023-10-24 17:49:01	177.51.63.71					Aceito os termos acima e concordo em participar da pesquisa.	26-30	Masculino	Parda	Superior Completo	Sim, com vínculo empregatício	De 3 a 6 salários mínimos (R$3.960 a R$7.920)	Não	Plano Piloto	Redes Particulares	Não	Não						Nenhuma condição		Provável	Muito provável	Provável	Provável	Muito provável	Provável	Muito provável	Provável	Provável	Improvável	Útil	Útil	Provável	Provável	Provável	Concordo parcialmente	Concordo parcialmente	Concordo parcialmente	Concordo totalmente	Discordo parcialmente	Discordo totalmente	Discordo parcialmente
114445347853	428177658	2023-10-24 17:33:45	2023-10-24 17:41:01	177.51.63.71					Aceito os termos acima e concordo em participar da pesquisa.	50+	Masculino	Branca	Superior Completo	Não	De 3 a 6 salários mínimos (R$3.960 a R$7.920)	Não	Plano Piloto	SUS e Redes Particulares	Sim	Não	Hipertensão/pressão alta	Diabetes						Improvável	Muito provável	Improvável	Provável	Muito provável	Provável	Muito provável	Muito provável	Provável	Muito improvável	Útil	Útil	Provável	Provável	Improvável	Discordo parcialmente	Discordo totalmente	Concordo parcialmente	Concordo parcialmente	Discordo parcialmente	Discordo totalmente	Discordo parcialmente
114445316551	428177658	2023-10-24 16:51:06	2023-10-24 17:02:40	177.51.62.4					Aceito os termos acima e concordo em participar da pesquisa.	18-25	Feminino	Preta	Superior Incompleto	Não	Até 1 salário mínimo (R$ 1.320)	Não	Plano Piloto	Redes Particulares	Não	Não						Nenhuma condição		Improvável	Provável	Improvável	Provável	Provável	Improvável	Muito provável	Muito provável	Provável	Provável	Muito Útil	Útil	Provável	Provável	Improvável	Concordo parcialmente	Concordo parcialmente	Discordo parcialmente	Concordo totalmente	Discordo totalmente	Discordo totalmente	Discordo totalmente
114445303108	428177658	2023-10-24 16:40:15	2023-10-24 16:47:18	177.51.62.4					Aceito os termos acima e concordo em participar da pesquisa.	41-45	Masculino	Parda	Superior Completo	Sim, sem vínculo empregatício	De 10 a 20 salários mínimos (R$13.200 a R$26.400)	Não	Lago Sul	SUS e Redes Particulares	Sim	Não						Nenhuma condição		Provável	Provável	Provável	Muito provável	Muito provável	Improvável	Provável	Muito provável	Improvável	Muito improvável	Muito Útil	Muito Inútil	Muito provável	Muito provável	Muito improvável	Concordo totalmente	Concordo totalmente	Discordo parcialmente	Concordo totalmente	Discordo totalmente	Discordo totalmente	Discordo totalmente
114445289749	428177658	2023-10-24 16:26:14	2023-10-24 16:32:53	177.51.62.4					Aceito os termos acima e concordo em participar da pesquisa.	50+	Masculino	Branca	Superior Completo	Sim, sem vínculo empregatício	De 6 a 9 salários mínimos (R$7.920 a R$11.880)	Não	Plano Piloto	Redes Particulares	Não	Não						Nenhuma condição		Provável	Provável	Improvável	Provável	Provável	Provável	Provável	Provável	Provável	Provável	Útil	Inútil	Provável	Muito provável	Improvável	Concordo totalmente	Concordo parcialmente	Discordo parcialmente	Concordo totalmente	Discordo parcialmente	Discordo totalmente	Concordo parcialmente
114445278537	428177658	2023-10-24 16:11:30	2023-10-24 16:21:21	177.51.62.4					Aceito os termos acima e concordo em participar da pesquisa.	50+	Feminino	Branca	Superior Completo	Não	De 3 a 6 salários mínimos (R$3.960 a R$7.920)	Não	Plano Piloto	SUS e Redes Particulares	Sim	Não						Nenhuma condição		Provável	Provável	Provável	Provável	Provável	Provável	Muito provável	Provável	Muito provável	Muito provável	Muito Útil	Muito Útil	Provável	Provável	Improvável	Concordo parcialmente	Discordo parcialmente	Discordo parcialmente	Concordo totalmente	Discordo totalmente	Discordo totalmente	Discordo parcialmente
114445268564	428177658	2023-10-24 16:00:51	2023-10-24 16:11:19	177.51.62.4					Aceito os termos acima e concordo em participar da pesquisa.	50+	Feminino	Branca	Superior Completo	Não	De 3 a 6 salários mínimos (R$3.960 a R$7.920)	Não	Lago Sul	Redes Particulares	Não	Não						Nenhuma condição		Provável	Provável	Improvável	Muito provável	Muito provável	Improvável	Muito provável	Muito provável	Improvável	Improvável	Muito Útil	Inútil	Muito provável	Muito provável	Improvável	Concordo parcialmente	Concordo parcialmente	Discordo parcialmente	Concordo totalmente	Discordo parcialmente	Discordo parcialmente	Discordo parcialmente
114445257975	428177658	2023-10-24 15:47:10	2023-10-24 16:00:39	177.51.62.4					Aceito os termos acima e concordo em participar da pesquisa.	50+	Feminino	Branca	Superior Completo	Não	De 3 a 6 salários mínimos (R$3.960 a R$7.920)	Não	Lago Sul	SUS e Redes Particulares	Sim	Não	Hipertensão/pressão alta	Diabetes						Muito provável	Muito provável	Provável	Provável	Muito provável	Provável	Muito provável	Muito provável	Muito provável	Muito improvável	Muito Útil	Útil	Muito provável	Muito provável	Provável	Discordo parcialmente	Discordo totalmente	Concordo parcialmente	Concordo parcialmente	Discordo totalmente	Discordo totalmente	Discordo totalmente
114445244297	428177658	2023-10-24 15:37:00	2023-10-24 15:46:59	177.51.62.4					Aceito os termos acima e concordo em participar da pesquisa.	26-30	Masculino	Parda	Superior Incompleto	Sim, com vínculo empregatício	De 1 a 3 salários mínimos (R$1.320 a R$3.960)	Não	Riacho Fundo	SUS e Redes Particulares	Não	Não						Nenhuma condição		Provável	Provável	Provável	Muito provável	Muito provável	Provável	Provável	Provável	Provável	Improvável	Muito Útil	Inútil	Provável	Provável	Improvável	Discordo parcialmente	Concordo parcialmente	Concordo parcialmente	Concordo parcialmente	Discordo parcialmente	Discordo totalmente	Concordo parcialmente
114445232685	428177658	2023-10-24 15:26:13	2023-10-24 15:35:13	177.51.62.4					Aceito os termos acima e concordo em participar da pesquisa.	26-30	Feminino	Parda	Ensino Médio Incompleto	Sim, com vínculo empregatício	De 1 a 3 salários mínimos (R$1.320 a R$3.960)	Não	Candangolândia	SUS	Não	Não			Depressão					Provável	Provável	Muito provável	Muito provável	Muito provável	Muito provável	Muito provável	Provável	Muito provável	Improvável	Muito Útil	Muito Útil	Muito provável	Muito provável	Improvável	Concordo totalmente	Discordo parcialmente	Concordo parcialmente	Concordo totalmente	Discordo totalmente	Discordo totalmente	Discordo totalmente
114445217448	428177658	2023-10-24 15:08:10	2023-10-24 15:20:04	177.51.62.4					Aceito os termos acima e concordo em participar da pesquisa.	31-35	Feminino	Branca	Superior Completo	Sim, sem vínculo empregatício	De 3 a 6 salários mínimos (R$3.960 a R$7.920)	Sim	Lago Sul	Redes Particulares	Não	Não						Nenhuma condição		Muito provável	Muito provável	Provável	Provável	Muito provável	Provável	Muito provável	Muito provável	Muito provável	Provável	Muito Útil	Muito Útil	Muito provável	Muito provável	Provável	Concordo totalmente	Concordo parcialmente	Concordo parcialmente	Concordo parcialmente	Concordo parcialmente	Discordo totalmente	Discordo parcialmente
114445205369	428177658	2023-10-24 14:56:50	2023-10-24 15:07:54	177.51.62.4					Aceito os termos acima e concordo em participar da pesquisa.	50+	Feminino	Branca	Ensino Médio completo	Sim, com vínculo empregatício	De 3 a 6 salários mínimos (R$3.960 a R$7.920)	Não	Plano Piloto	SUS e Redes Particulares	Sim	Não	Hipertensão/pressão alta						Ansiedade	Provável	Provável	Provável	Provável	Muito provável	Provável	Muito provável	Muito provável	Muito provável	Improvável	Muito Útil	Útil	Provável	Muito provável	Improvável	Concordo totalmente	Discordo parcialmente	Discordo parcialmente	Discordo parcialmente	Discordo totalmente	Discordo totalmente	Discordo totalmente
114445192640	428177658	2023-10-24 14:48:11	2023-10-24 14:56:39	177.51.62.4					Aceito os termos acima e concordo em participar da pesquisa.	26-30	Feminino	Branca	Superior Completo	Sim, com vínculo empregatício	De 1 a 3 salários mínimos (R$1.320 a R$3.960)	Não	Plano Piloto	Redes Particulares	Não	Não			Depressão					Provável	Muito provável	Muito provável	Muito provável	Muito provável	Muito provável	Muito provável	Muito provável	Muito provável	Improvável	Muito Útil	Útil	Muito provável	Provável	Improvável	Concordo totalmente	Concordo totalmente	Discordo parcialmente	Concordo parcialmente	Discordo totalmente	Discordo totalmente	Discordo totalmente
114445183564	428177658	2023-10-24 14:37:32	2023-10-24 14:47:12	177.51.62.4					Aceito os termos acima e concordo em participar da pesquisa.	26-30	Feminino	Branca	Superior Completo	Sim, com vínculo empregatício	De 1 a 3 salários mínimos (R$1.320 a R$3.960)	Não	Plano Piloto	Redes Particulares	Não	Não						Nenhuma condição		Provável	Muito provável	Muito provável	Provável	Muito provável	Provável	Muito provável	Muito provável	Muito provável	Muito improvável	Útil	Útil	Provável	Provável	Improvável	Concordo totalmente	Discordo parcialmente	Discordo parcialmente	Discordo parcialmente	Discordo totalmente	Discordo totalmente	Discordo totalmente
114445171510	428177658	2023-10-24 14:21:55	2023-10-24 14:34:49	177.51.62.4					Aceito os termos acima e concordo em participar da pesquisa.	31-35	Feminino	Branca	Superior Completo	Sim, sem vínculo empregatício	De 6 a 9 salários mínimos (R$7.920 a R$11.880)	Não	Plano Piloto	SUS e Redes Particulares	Não	Não						Nenhuma condição		Improvável	Provável	Improvável	Muito provável	Muito provável	Provável	Muito provável	Provável	Provável	Provável	Muito Útil	Inútil	Muito provável	Muito provável	Muito improvável	Concordo totalmente	Concordo totalmente	Discordo parcialmente	Concordo totalmente	Discordo totalmente	Discordo totalmente	Discordo totalmente
114445149777	428177658	2023-10-24 14:04:44	2023-10-24 14:13:37	177.51.62.4					Aceito os termos acima e concordo em participar da pesquisa.	36-40	Feminino	Branca	Superior Completo	Sim, com vínculo empregatício	De 3 a 6 salários mínimos (R$3.960 a R$7.920)	Não	Núcleo Bandeirante	Redes Particulares	Não	Não						Nenhuma condição		Provável	Provável	Muito provável	Provável	Muito provável	Provável	Provável	Provável	Improvável	Improvável	Útil	Útil	Provável	Provável	Provável	Concordo totalmente	Concordo parcialmente	Discordo totalmente	Concordo totalmente	Discordo parcialmente	Discordo totalmente	Discordo parcialmente
114445132657	428177658	2023-10-24 13:45:23	2023-10-24 13:56:26	177.51.62.4					Aceito os termos acima e concordo em participar da pesquisa.	26-30	Feminino	Branca	Superior Completo	Sim, com vínculo empregatício	De 3 a 6 salários mínimos (R$3.960 a R$7.920)	Não	Sobradinho	Redes Particulares	Não	Não						Nenhuma condição		Provável	Muito provável	Improvável	Muito provável	Muito provável	Provável	Muito provável	Muito provável	Muito provável	Provável	Muito Útil	Muito Inútil	Provável	Provável	Improvável	Concordo parcialmente	Concordo parcialmente	Discordo parcialmente	Concordo parcialmente	Discordo parcialmente	Discordo totalmente	Discordo parcialmente
114445119381	428177658	2023-10-24 13:33:59	2023-10-24 13:43:41	177.51.62.4					Aceito os termos acima e concordo em participar da pesquisa.	18-25	Feminino	Branca	Superior Incompleto	Não	Até 1 salário mínimo (R$ 1.320)	Não	Plano Piloto	Redes Particulares	Não	Não						Nenhuma condição		Provável	Provável	Provável	Provável	Muito provável	Improvável	Muito provável	Provável	Muito provável	Improvável	Muito Útil	Inútil	Provável	Provável	Improvável	Concordo parcialmente	Concordo totalmente	Discordo parcialmente	Concordo totalmente	Discordo totalmente	Discordo totalmente	Discordo totalmente
114445050299	428177658	2023-10-24 12:07:18	2023-10-24 12:35:26	189.40.77.236					Aceito os termos acima e concordo em participar da pesquisa.	50+	Masculino	Preta	Superior Completo	Sim, sem vínculo empregatício	De 3 a 6 salários mínimos (R$3.960 a R$7.920)	Não	Guará	SUS e Redes Particulares	Sim	Não	Hipertensão/pressão alta							Provável	Provável	Provável	Provável	Provável	Provável	Provável	Muito provável	Muito provável	Improvável	Muito Útil	Útil	Provável	Provável	Provável	Concordo parcialmente	Concordo totalmente	Discordo parcialmente	Concordo totalmente	Discordo parcialmente	Discordo parcialmente	Discordo totalmente
114445020484	428177658	2023-10-24 11:54:00	2023-10-24 12:07:08	189.40.77.236					Aceito os termos acima e concordo em participar da pesquisa.	50+	Masculino	Preta	Ensino Médio completo	Sim, sem vínculo empregatício	De 1 a 3 salários mínimos (R$1.320 a R$3.960)	Sim	Paranoá	SUS	Não	Não						Nenhuma condição		Improvável	Provável	Provável	Improvável	Improvável	Improvável	Provável	Improvável	Improvável	Provável	Útil	Útil	Provável	Improvável	Muito improvável	Discordo parcialmente	Discordo totalmente	Discordo totalmente	Discordo parcialmente	Concordo parcialmente	Concordo parcialmente	Concordo parcialmente
114445006333	428177658	2023-10-24 11:46:17	2023-10-24 11:53:43	189.40.77.236					Aceito os termos acima e concordo em participar da pesquisa.	18-25	Feminino	Parda	Superior Incompleto	Sim, com vínculo empregatício	De 1 a 3 salários mínimos (R$1.320 a R$3.960)	Não	Taguatinga	SUS e Redes Particulares	Não	Não						Nenhuma condição		Improvável	Provável	Improvável	Provável	Provável	Provável	Muito provável	Muito provável	Muito provável	Provável	Muito Útil	Inútil	Muito provável	Muito provável	Muito improvável	Concordo parcialmente	Concordo parcialmente	Discordo parcialmente	Concordo totalmente	Discordo parcialmente	Discordo totalmente	Discordo parcialmente
114444998157	428177658	2023-10-24 11:31:46	2023-10-24 11:45:48	189.40.77.236					Aceito os termos acima e concordo em participar da pesquisa.	18-25	Feminino	Parda	Superior Incompleto	Sim, com vínculo empregatício	De 1 a 3 salários mínimos (R$1.320 a R$3.960)	Sim	Riacho Fundo	SUS e Redes Particulares	Não	Não						Nenhuma condição		Improvável	Provável	Provável	Muito provável	Provável	Provável	Provável	Provável	Muito improvável	Provável	Muito Útil	Inútil	Provável	Provável	Muito improvável	Concordo totalmente	Não concordo nem discordo	Discordo totalmente	Discordo totalmente	Não concordo nem discordo	Não concordo nem discordo	Discordo totalmente
114444982204	428177658	2023-10-24 11:14:59	2023-10-24 11:30:46	189.40.77.236					Aceito os termos acima e concordo em participar da pesquisa.	26-50	Feminino	Parda	Ensino Médio completo	Sim, sem vínculo empregatício	Até 1 salário mínimo (R$ 1.320)	Não	Santa Maria	SUS e Redes Particulares	Não	Não						Nenhuma condição		Provável	Provável	Provável	Provável	Muito provável	Provável	Provável	Muito provável	Muito provável	Improvável	Muito Útil	Útil	Provável	Provável	Improvável	Discordo parcialmente	Discordo parcialmente	Discordo parcialmente	Discordo parcialmente	Discordo parcialmente	Não concordo nem discordo	Concordo parcialmente
114444965136	428177658	2023-10-24 11:02:50	2023-10-24 11:14:40	189.40.77.236					Aceito os termos acima e concordo em participar da pesquisa.	18-25	Masculino	Parda	Superior Incompleto	Sim, com vínculo empregatício	De 1 a 3 salários mínimos (R$1.320 a R$3.960)	Não	Vicente Pires	Redes Particulares	Não	Não						Nenhuma condição		Provável	Muito provável	Muito provável	Provável	Provável	Provável	Provável	Muito provável	Provável	Improvável	Muito Útil	Inútil	Provável	Provável	Provável	Concordo parcialmente	Concordo parcialmente	Concordo parcialmente	Concordo parcialmente	Discordo parcialmente	Discordo parcialmente	Discordo parcialmente
114444952079	428177658	2023-10-24 10:53:13	2023-10-24 11:02:38	189.40.77.236					Aceito os termos acima e concordo em participar da pesquisa.	18-25	Feminino	Branca	Superior Incompleto	Não	Até 1 salário mínimo (R$ 1.320)	Não	Cruzeiro	SUS e Redes Particulares	Sim	Não						Nenhuma condição		Provável	Provável	Provável	Provável	Muito provável	Provável	Provável	Provável	Provável	Provável	Muito Útil	Muito Inútil	Muito provável	Muito provável	Improvável	Concordo parcialmente	Concordo totalmente	Concordo parcialmente	Concordo totalmente	Discordo totalmente	Discordo totalmente	Discordo totalmente
114444941123	428177658	2023-10-24 10:39:25	2023-10-24 10:53:03	189.40.77.236					Aceito os termos acima e concordo em participar da pesquisa.	31-35	Feminino	Parda	Superior Incompleto	Sim, sem vínculo empregatício	De 1 a 3 salários mínimos (R$1.320 a R$3.960)	Não	Planaltina	SUS e Redes Particulares	Não	Não						Nenhuma condição		Provável	Muito provável	Provável	Muito provável	Muito improvável	Provável	Muito provável	Muito provável	Provável	Improvável	Muito Útil	Muito Útil	Improvável	Muito improvável	Provável	Concordo parcialmente	Discordo totalmente	Discordo totalmente	Concordo totalmente	Concordo totalmente	Discordo parcialmente	Discordo totalmente
114444926012	428177658	2023-10-24 10:16:23	2023-10-24 10:38:59	189.40.77.236					Aceito os termos acima e concordo em participar da pesquisa.	50+	Feminino	Preta	Ensino Médio completo	Sim, com vínculo empregatício	De 1 a 3 salários mínimos (R$1.320 a R$3.960)	Não	Ceilândia	SUS e Redes Particulares	Não	Não						Nenhuma condição		Improvável	Provável	Provável	Improvável	Muito provável	Improvável	Provável	Muito provável	Muito provável	Improvável	Muito Útil	Muito Útil	Improvável	Muito provável	Muito provável	Concordo totalmente	Discordo parcialmente	Concordo totalmente	Concordo totalmente	Concordo parcialmente	Concordo parcialmente	Discordo totalmente
114444902832	428177658	2023-10-24 10:04:29	2023-10-24 10:15:53	189.40.77.236					Aceito os termos acima e concordo em participar da pesquisa.	31-35	Masculino	Preta	Ensino Médio completo	Sim, com vínculo empregatício	De 1 a 3 salários mínimos (R$1.320 a R$3.960)	Sim	Recanto Das Emas	SUS	Não	Não						Nenhuma condição		Provável	Muito provável	Muito provável	Muito provável	Muito provável	Muito provável	Muito provável	Muito provável	Muito provável	Provável	Útil	Muito Útil	Provável	Muito improvável	Provável	Concordo parcialmente	Concordo parcialmente	Concordo totalmente	Concordo parcialmente	Discordo totalmente	Discordo totalmente	Discordo totalmente
114444890402	428177658	2023-10-24 09:51:28	2023-10-24 10:04:14	189.40.77.236					Aceito os termos acima e concordo em participar da pesquisa.	18-25	Feminino	Branca	Ensino Médio completo	Sim, com vínculo empregatício	Até 1 salário mínimo (R$ 1.320)	Sim	Núcleo Bandeirante	SUS	Não	Não						Nenhuma condição		Improvável	Provável	Provável	Provável	Muito provável	Muito provável	Muito provável	Muito improvável	Provável	Muito provável	Muito Útil	Muito Útil	Muito provável	Muito provável	Muito improvável	Concordo totalmente	Concordo parcialmente	Discordo totalmente	Concordo totalmente	Concordo parcialmente	Discordo totalmente	Discordo totalmente
114444888633	428177658	2023-10-24 09:54:22	2023-10-24 10:02:22	177.51.61.130					Aceito os termos acima e concordo em participar da pesquisa.	26-30	Feminino	Branca	Ensino Médio completo	Sim, com vínculo empregatício	De 1 a 3 salários mínimos (R$1.320 a R$3.960)	Não	Ceilândia	SUS	Não	Não						Nenhuma condição		Provável	Muito provável	Muito provável	Improvável	Provável	Provável	Provável	Provável	Muito improvável	Muito improvável	Muito Inútil	Muito Útil	Muito provável	Provável	Provável	Concordo parcialmente	Concordo parcialmente	Concordo totalmente	Concordo totalmente	Concordo parcialmente	Concordo parcialmente	Concordo parcialmente
114444878702	428177658	2023-10-24 09:42:09	2023-10-24 09:51:11	189.40.77.236					Aceito os termos acima e concordo em participar da pesquisa.	26-30	Feminino	Preta	Superior Incompleto	Não	Até 1 salário mínimo (R$ 1.320)	Não	Ceilândia	SUS	Não	Não						Nenhuma condição		Muito provável	Muito provável	Provável	Provável	Muito provável	Provável	Muito provável	Muito provável	Muito provável	Improvável	Muito Útil	Útil	Muito provável	Improvável	Provável	Concordo totalmente	Concordo totalmente	Concordo totalmente	Concordo totalmente	Discordo totalmente	Discordo totalmente	Discordo totalmente
114444351982	428177658	2023-10-23 18:04:43	2023-10-23 18:17:00	189.40.76.220					Aceito os termos acima e concordo em participar da pesquisa.	18-25	Masculino	Parda	Fundamental completo	Sim, sem vínculo empregatício	De 1 a 3 salários mínimos (R$1.320 a R$3.960)	Não	Planaltina	SUS	Não	Não						Nenhuma condição		Provável	Provável	Muito provável	Provável	Provável	Provável	Provável	Provável	Improvável	Improvável	Muito Útil	Útil	Provável	Muito provável	Provável	Discordo totalmente	Concordo parcialmente	Concordo totalmente	Discordo parcialmente	Concordo parcialmente	Concordo parcialmente	Concordo parcialmente
114444341623	428177658	2023-10-23 17:56:21	2023-10-23 18:04:27	189.40.76.220					Aceito os termos acima e concordo em participar da pesquisa.	18-25	Feminino	Branca	Superior Incompleto	Não	De 1 a 3 salários mínimos (R$1.320 a R$3.960)	Não	Samambaia	SUS e Redes Particulares	Não	Não						Nenhuma condição		Provável	Provável	Improvável	Provável	Provável	Improvável	Provável	Improvável	Improvável	Provável	Útil	Inútil	Muito provável	Muito provável	Improvável	Concordo parcialmente	Concordo totalmente	Concordo parcialmente	Concordo totalmente	Discordo totalmente	Discordo totalmente	Discordo parcialmente
114444334875	428177658	2023-10-23 17:29:45	2023-10-23 17:56:06	189.40.76.220					Aceito os termos acima e concordo em participar da pesquisa.	26-30	Feminino	Parda	Superior Incompleto	Sim, com vínculo empregatício	De 1 a 3 salários mínimos (R$1.320 a R$3.960)	Não	Sobradinho	Redes Particulares	Não	Não						Nenhuma condição		Improvável	Provável	Improvável	Provável	Provável	Improvável	Muito provável	Provável	Muito provável	Provável	Muito Útil	Útil	Provável	Provável	Improvável	Concordo parcialmente	Concordo totalmente	Concordo parcialmente	Concordo totalmente	Discordo parcialmente	Discordo parcialmente	Discordo parcialmente
114444310432	428177658	2023-10-23 17:14:07	2023-10-23 17:27:50	189.40.78.189					Aceito os termos acima e concordo em participar da pesquisa.	18-25	Feminino	Parda	Ensino Médio completo	Não	De 3 a 6 salários mínimos (R$3.960 a R$7.920)	Sim	Ceilândia	SUS e Redes Particulares	Não	Não						Nenhuma condição		Muito provável	Muito provável	Provável	Provável	Muito provável	Provável	Provável	Provável	Provável	Improvável	Útil	Inútil	Provável	Provável	Improvável	Concordo parcialmente	Concordo totalmente	Discordo totalmente	Concordo totalmente	Discordo totalmente	Discordo totalmente	Discordo totalmente
114444292398	428177658	2023-10-23 16:51:27	2023-10-23 17:07:51	189.40.78.189					Aceito os termos acima e concordo em participar da pesquisa.	26-30	Masculino	Parda	Ensino Médio completo	Sim, com vínculo empregatício	De 1 a 3 salários mínimos (R$1.320 a R$3.960)	Não	Planaltina	SUS e Redes Particulares	Não	Não						Nenhuma condição		Provável	Provável	Improvável	Muito provável	Improvável	Improvável	Provável	Muito provável	Improvável	Improvável	Útil	Inútil	Provável	Improvável	Improvável	Concordo totalmente	Concordo totalmente	Concordo parcialmente	Concordo totalmente	Discordo parcialmente	Concordo parcialmente	Discordo parcialmente
114444276107	428177658	2023-10-23 16:38:08	2023-10-23 16:51:01	189.40.78.189					Aceito os termos acima e concordo em participar da pesquisa.	18-25	Feminino	Preta	Superior Incompleto	Não	Até 1 salário mínimo (R$ 1.320)	Não	Itapoã	SUS	Não	Não						Nenhuma condição		Provável	Muito provável	Provável	Muito provável	Provável	Provável	Muito provável	Muito provável	Muito provável	Provável	Útil	Inútil	Improvável	Provável	Provável	Concordo totalmente	Concordo totalmente	Concordo parcialmente	Concordo totalmente	Discordo totalmente	Discordo totalmente	Discordo totalmente
114444263862	428177658	2023-10-23 16:24:31	2023-10-23 16:37:50	189.40.78.189					Aceito os termos acima e concordo em participar da pesquisa.	18-25	Feminino	Parda	Superior Completo	Sim, com vínculo empregatício	De 1 a 3 salários mínimos (R$1.320 a R$3.960)	Não	Ceilândia	SUS	Não	Não						Nenhuma condição		Provável	Provável	Muito provável	Provável	Muito provável	Provável	Provável	Muito provável	Muito provável	Provável	Muito Útil	Útil	Provável	Provável	Provável	Concordo parcialmente	Concordo totalmente	Discordo parcialmente	Concordo totalmente	Discordo totalmente	Discordo totalmente	Discordo totalmente
114444251032	428177658	2023-10-23 16:14:24	2023-10-23 16:24:20	189.40.78.189					Aceito os termos acima e concordo em participar da pesquisa.	18-25	Feminino	Parda	Ensino Médio completo	Sim, com vínculo empregatício	De 1 a 3 salários mínimos (R$1.320 a R$3.960)	Não	Taguatinga	SUS	Não	Não						Nenhuma condição		Muito provável	Muito provável	Muito provável	Muito provável	Muito provável	Muito provável	Muito provável	Muito provável	Muito provável	Improvável	Útil	Útil	Provável	Provável	Improvável	Discordo parcialmente	Concordo parcialmente	Concordo parcialmente	Concordo parcialmente	Discordo totalmente	Discordo totalmente	Discordo totalmente
114444240467	428177658	2023-10-23 16:01:00	2023-10-23 16:13:50	177.51.62.60					Aceito os termos acima e concordo em participar da pesquisa.	18-25	Masculino	Parda	Ensino Médio completo	Sim, com vínculo empregatício	De 1 a 3 salários mínimos (R$1.320 a R$3.960)	Não	Núcleo Bandeirante	SUS	Não	Não						Nenhuma condição		Provável	Provável	Improvável	Provável	Muito provável	Muito provável	Provável	Provável	Improvável	Provável	Inútil	Inútil	Provável	Muito provável	Improvável	Concordo totalmente	Concordo parcialmente	Discordo parcialmente	Concordo parcialmente	Concordo parcialmente	Concordo parcialmente	Discordo totalmente
114444225714	428177658	2023-10-23 15:47:29	2023-10-23 16:00:02	177.51.62.60					Aceito os termos acima e concordo em participar da pesquisa.	18-25	Masculino	Branca	Superior Incompleto	Sim, sem vínculo empregatício	De 1 a 3 salários mínimos (R$1.320 a R$3.960)	Não	Recanto Das Emas	SUS e Redes Particulares	Sim	Não						Nenhuma condição		Provável	Muito provável	Muito provável	Provável	Muito provável	Provável	Muito provável	Muito provável	Improvável	Improvável	Muito Útil	Inútil	Provável	Muito provável	Improvável	Concordo parcialmente	Concordo totalmente	Concordo totalmente	Concordo totalmente	Discordo totalmente	Discordo totalmente	Discordo totalmente
114444207437	428177658	2023-10-23 15:24:10	2023-10-23 15:47:15	177.51.62.60					Aceito os termos acima e concordo em participar da pesquisa.	18-25	Feminino	Branca	Superior Incompleto	Não	De 1 a 3 salários mínimos (R$1.320 a R$3.960)	Não	Candangolândia	SUS e Redes Particulares	Não	Não						Nenhuma condição		Provável	Muito provável	Provável	Muito improvável	Provável	Provável	Provável	Provável	Muito provável	Provável	Útil	Inútil	Improvável	Provável	Provável	Discordo parcialmente	Concordo totalmente	Discordo totalmente	Não concordo nem discordo	Discordo totalmente	Discordo totalmente	Discordo totalmente
114444165766	428177658	2023-10-23 14:57:52	2023-10-23 15:14:01	177.51.62.60					Aceito os termos acima e concordo em participar da pesquisa.	26-30	Masculino	Preta	Ensino Médio completo	Não	Até 1 salário mínimo (R$ 1.320)	Não	Recanto Das Emas	SUS	Sim	Não							Não quer especificar	Improvável	Improvável	Provável	Provável	Provável	Provável	Provável	Provável	Provável	Improvável	Muito Útil	Útil	Provável	Provável	Improvável	Discordo parcialmente	Concordo totalmente	Discordo parcialmente	Discordo parcialmente	Discordo parcialmente	Concordo parcialmente	Discordo totalmente
114444149489	428177658	2023-10-23 14:44:50	2023-10-23 14:57:36	177.51.62.60					Aceito os termos acima e concordo em participar da pesquisa.	31-35	Feminino	Parda	Superior Completo	Sim, com vínculo empregatício	De 1 a 3 salários mínimos (R$1.320 a R$3.960)	Sim	Cruzeiro	Redes Particulares	Não	Não						Nenhuma condição		Provável	Provável	Improvável	Provável	Provável	Improvável	Provável	Muito provável	Provável	Provável	Muito Útil	Útil	Provável	Provável	Muito provável	Concordo parcialmente	Concordo parcialmente	Concordo totalmente	Concordo parcialmente	Concordo parcialmente	Discordo parcialmente	Discordo totalmente
114444137436	428177658	2023-10-23 14:33:08	2023-10-23 14:44:40	177.51.62.60					Aceito os termos acima e concordo em participar da pesquisa.	18-25	Feminino	Parda	Superior Incompleto	Sim, sem vínculo empregatício	De 1 a 3 salários mínimos (R$1.320 a R$3.960)	Não	Cruzeiro	SUS	Não	Não						Nenhuma condição		Provável	Provável	Improvável	Muito provável	Provável	Provável	Provável	Provável	Muito provável	Improvável	Muito Útil	Inútil	Provável	Provável	Improvável	Discordo parcialmente	Concordo parcialmente	Concordo totalmente	Concordo totalmente	Discordo totalmente	Discordo totalmente	Discordo totalmente
114444126130	428177658	2023-10-23 14:12:39	2023-10-23 14:32:23	177.51.61.218					Aceito os termos acima e concordo em participar da pesquisa.	18-25	Feminino	Branca	Superior Incompleto	Não	Até 1 salário mínimo (R$ 1.320)	Não	Núcleo Bandeirante	Redes Particulares	Sim	Não			Depressão					Improvável	Improvável	Provável	Muito provável	Muito provável	Muito provável	Muito provável	Muito provável	Muito improvável	Muito improvável	Muito Útil	Inútil	Muito provável	Muito provável	Muito improvável	Concordo totalmente	Concordo totalmente	Não concordo nem discordo	Concordo parcialmente	Discordo totalmente	Discordo totalmente	Discordo totalmente
114444107020	428177658	2023-10-23 14:01:37	2023-10-23 14:12:12	177.51.62.60					Aceito os termos acima e concordo em participar da pesquisa.	26-30	Feminino	Parda	Superior Incompleto	Sim, com vínculo empregatício	De 1 a 3 salários mínimos (R$1.320 a R$3.960)	Não	Estrutural/Scia	SUS	Não	Não						Nenhuma condição		Muito provável	Muito provável	Muito provável	Muito provável	Muito provável	Muito provável	Muito provável	Muito provável	Muito provável	Improvável	Muito Útil	Inútil	Muito provável	Muito provável	Provável	Concordo totalmente	Concordo totalmente	Concordo totalmente	Concordo totalmente	Discordo totalmente	Discordo totalmente	Discordo totalmente
114444095699	428177658	2023-10-23 13:51:04	2023-10-23 14:01:27	177.51.61.218					Aceito os termos acima e concordo em participar da pesquisa.	18-25	Masculino	Parda	Ensino Médio completo	Não	De 1 a 3 salários mínimos (R$1.320 a R$3.960)	Não	Guará	Redes Particulares	Não	Não						Nenhuma condição		Muito provável	Provável	Muito provável	Improvável	Muito provável	Muito improvável	Muito provável	Muito provável	Muito provável	Improvável	Útil	Inútil	Improvável	Provável	Muito improvável	Discordo parcialmente	Discordo totalmente	Concordo totalmente	Discordo parcialmente	Discordo totalmente	Concordo totalmente	Discordo totalmente
114444085636	428177658	2023-10-23 12:47:53	2023-10-23 13:50:54	177.51.62.60					Aceito os termos acima e concordo em participar da pesquisa.	18-25	Masculino	Parda	Ensino Médio completo	Não	Até 1 salário mínimo (R$ 1.320)	Não	Vicente Pires	SUS e Redes Particulares	Não	Não						Nenhuma condição		Provável	Provável	Provável	Improvável	Provável	Provável	Muito provável	Provável	Provável	Muito provável	Muito Útil	Muito Inútil	Improvável	Provável	Improvável	Concordo totalmente	Não concordo nem discordo	Concordo totalmente	Concordo parcialmente	Discordo parcialmente	Discordo parcialmente	Discordo parcialmente
114444021971	428177658	2023-10-23 12:33:51	2023-10-23 12:47:28	189.40.77.130					Aceito os termos acima e concordo em participar da pesquisa.	18-25	Feminino	Branca	Ensino Médio completo	Não	De 1 a 3 salários mínimos (R$1.320 a R$3.960)	Não	Paranoá	SUS	Não	Não						Nenhuma condição		Provável	Provável	Improvável	Provável	Provável	Improvável	Provável	Muito provável	Improvável	Improvável	Muito Útil	Útil	Provável	Provável	Provável	Discordo parcialmente	Concordo totalmente	Concordo totalmente	Concordo totalmente	Concordo totalmente	Concordo parcialmente	Concordo parcialmente
114444008100	428177658	2023-10-23 12:23:55	2023-10-23 12:33:38	189.40.77.130					Aceito os termos acima e concordo em participar da pesquisa.	18-25	Masculino	Preta	Ensino Médio completo	Sim, com vínculo empregatício	De 1 a 3 salários mínimos (R$1.320 a R$3.960)	Não	Paranoá	Redes Particulares	Não	Não						Nenhuma condição		Improvável	Provável	Provável	Provável	Provável	Provável	Provável	Muito provável	Improvável	Provável	Muito Útil	Útil	Provável	Muito provável	Improvável	Concordo totalmente	Concordo totalmente	Concordo totalmente	Concordo totalmente	Discordo parcialmente	Concordo parcialmente	Discordo totalmente
114443997135	428177658	2023-10-23 12:12:37	2023-10-23 12:23:34	189.40.77.130					Aceito os termos acima e concordo em participar da pesquisa.	26-30	Feminino	Parda	Ensino Médio completo	Sim, sem vínculo empregatício	Até 1 salário mínimo (R$ 1.320)	Não	Sobradinho	SUS e Redes Particulares	Não	Não						Nenhuma condição		Improvável	Provável	Provável	Improvável	Muito provável	Provável	Provável	Provável	Muito improvável	Provável	Muito Útil	Útil	Muito provável	Muito provável	Provável	Concordo totalmente	Concordo totalmente	Concordo totalmente	Concordo totalmente	Discordo parcialmente	Concordo totalmente	Concordo parcialmente
114443985892	428177658	2023-10-23 11:49:54	2023-10-23 12:12:27	189.40.77.130					Aceito os termos acima e concordo em participar da pesquisa.	50+	Masculino	Parda	Ensino Médio completo	Não	De 1 a 3 salários mínimos (R$1.320 a R$3.960)	Não	Itapoã	SUS	Sim	Não	Hipertensão/pressão alta							Improvável	Provável	Muito improvável	Muito improvável	Provável	Improvável	Provável	Muito improvável	Improvável	Muito provável	Muito Útil	Inútil	Improvável	Provável	Muito improvável	Discordo totalmente	Discordo parcialmente	Discordo totalmente	Discordo totalmente	Discordo totalmente	Discordo totalmente	Discordo totalmente
114443962557	428177658	2023-10-23 11:40:37	2023-10-23 11:49:39	189.40.77.130					Aceito os termos acima e concordo em participar da pesquisa.	18-25	Masculino	Parda	Ensino Médio completo	Não	Até 1 salário mínimo (R$ 1.320)	Não	Samambaia	SUS	Não	Não						Nenhuma condição		Provável	Provável	Provável	Improvável	Provável	Provável	Provável	Provável	Muito provável	Improvável	Útil	Inútil	Provável	Provável	Muito improvável	Discordo parcialmente	Concordo parcialmente	Concordo parcialmente	Concordo parcialmente	Concordo totalmente	Concordo parcialmente	Concordo parcialmente
114443953403	428177658	2023-10-23 11:30:17	2023-10-23 11:40:28	189.40.77.130					Aceito os termos acima e concordo em participar da pesquisa.	18-25	Masculino	Branca	Superior Incompleto	Sim, com vínculo empregatício	De 3 a 6 salários mínimos (R$3.960 a R$7.920)	Não	Planaltina	SUS e Redes Particulares	Não	Não						Nenhuma condição		Provável	Muito provável	Muito provável	Provável	Provável	Provável	Provável	Provável	Provável	Provável	Muito Útil	Útil	Provável	Provável	Provável	Discordo parcialmente	Concordo parcialmente	Concordo totalmente	Concordo totalmente	Discordo parcialmente	Discordo parcialmente	Discordo parcialmente
114443942980	428177658	2023-10-23 11:12:53	2023-10-23 11:30:07	189.40.77.130					Aceito os termos acima e concordo em participar da pesquisa.	18-25	Masculino	Branca	Superior Incompleto	Sim, sem vínculo empregatício	Até 1 salário mínimo (R$ 1.320)	Não	Ceilândia	SUS e Redes Particulares	Sim	Não							Autismo	Provável	Provável	Muito provável	Muito provável	Muito provável	Provável	Muito provável	Muito provável	Improvável	Muito provável	Muito Útil	Útil	Muito provável	Muito provável	Improvável	Concordo totalmente	Concordo totalmente	Concordo totalmente	Concordo totalmente	Discordo totalmente	Discordo totalmente	Discordo totalmente
114443925818	428177658	2023-10-23 11:03:13	2023-10-23 11:12:43	189.40.77.130					Aceito os termos acima e concordo em participar da pesquisa.	26-30	Masculino	Branca	Superior Incompleto	Sim, com vínculo empregatício	De 1 a 3 salários mínimos (R$1.320 a R$3.960)	Não	Plano Piloto	Redes Particulares	Sim	Não						Nenhuma condição		Muito provável	Provável	Provável	Muito provável	Provável	Provável	Provável	Muito provável	Muito provável	Muito improvável	Muito Útil	Útil	Provável	Provável	Improvável	Concordo totalmente	Concordo totalmente	Concordo totalmente	Concordo totalmente	Discordo parcialmente	Discordo totalmente	Discordo parcialmente
114443915691	428177658	2023-10-23 10:49:54	2023-10-23 11:02:59	189.40.77.130					Aceito os termos acima e concordo em participar da pesquisa.	41-45	Feminino	Parda	Superior Completo	Não	De 1 a 3 salários mínimos (R$1.320 a R$3.960)	Não	Riacho Fundo	SUS	Não	Não						Nenhuma condição		Provável	Provável	Provável	Provável	Provável	Provável	Provável	Muito provável	Muito provável	Improvável	Muito Útil	Muito Útil	Muito provável	Muito provável	Provável	Discordo parcialmente	Concordo totalmente	Concordo totalmente	Concordo parcialmente	Discordo totalmente	Discordo totalmente	Discordo totalmente
114443902659	428177658	2023-10-23 10:39:25	2023-10-23 10:49:42	189.40.77.130					Aceito os termos acima e concordo em participar da pesquisa.	31-35	Masculino	Parda	Ensino Médio completo	Não	De 1 a 3 salários mínimos (R$1.320 a R$3.960)	Sim	Estrutural/Scia	SUS	Não	Não						Nenhuma condição		Improvável	Provável	Provável	Muito provável	Provável	Improvável	Muito provável	Muito provável	Provável	Improvável	Útil	Útil	Provável	Provável	Provável	Discordo parcialmente	Discordo parcialmente	Discordo totalmente	Discordo totalmente	Não concordo nem discordo	Não concordo nem discordo	Não concordo nem discordo
114443892708	428177658	2023-10-23 10:29:59	2023-10-23 10:39:07	189.40.77.130					Aceito os termos acima e concordo em participar da pesquisa.	31-35	Feminino	Parda	Superior Incompleto	Não	Até 1 salário mínimo (R$ 1.320)	Não	Itapoã	SUS	Não	Não						Nenhuma condição		Provável	Muito provável	Provável	Provável	Provável	Provável	Provável	Provável	Muito provável	Provável	Útil	Inútil	Muito provável	Provável	Improvável	Discordo parcialmente	Concordo totalmente	Discordo parcialmente	Concordo totalmente	Discordo totalmente	Discordo totalmente	Concordo parcialmente
114443882916	428177658	2023-10-23 10:13:12	2023-10-23 10:29:25	189.40.77.130					Aceito os termos acima e concordo em participar da pesquisa.	26-50	Feminino	Parda	Superior Completo	Sim, sem vínculo empregatício	De 1 a 3 salários mínimos (R$1.320 a R$3.960)	Não	Sobradinho	SUS	Não	Não						Nenhuma condição		Provável	Muito provável	Provável	Provável	Muito improvável	Provável	Muito provável	Muito provável	Provável	Muito provável	Muito Útil	Útil	Muito provável	Muito provável	Muito provável	Discordo parcialmente	Discordo parcialmente	Discordo parcialmente	Concordo totalmente	Discordo totalmente	Concordo parcialmente	Discordo parcialmente
114443867474	428177658	2023-10-23 10:03:31	2023-10-23 10:12:59	189.40.77.130					Aceito os termos acima e concordo em participar da pesquisa.	18-25	Feminino	Parda	Superior Incompleto	Sim, sem vínculo empregatício	De 1 a 3 salários mínimos (R$1.320 a R$3.960)	Não	Jardim Botânico	SUS	Não	Não						Nenhuma condição		Provável	Muito provável	Provável	Improvável	Provável	Improvável	Improvável	Muito provável	Provável	Improvável	Muito Útil	Útil	Provável	Muito provável	Improvável	Concordo totalmente	Concordo parcialmente	Não concordo nem discordo	Concordo totalmente	Discordo totalmente	Discordo totalmente	Discordo parcialmente
114443858279	428177658	2023-10-23 09:54:16	2023-10-23 10:03:13	189.40.77.130					Aceito os termos acima e concordo em participar da pesquisa.	50+	Feminino	Parda	Ensino Médio completo	Não	De 1 a 3 salários mínimos (R$1.320 a R$3.960)	Sim	Samambaia	SUS	Sim	Não	Hipertensão/pressão alta	Diabetes	Depressão					Provável	Provável	Muito provável	Muito provável	Muito provável	Muito provável	Muito provável	Improvável	Muito provável	Muito provável	Muito Útil	Útil	Muito provável	Provável	Improvável	Concordo totalmente	Concordo totalmente	Concordo parcialmente	Concordo totalmente	Discordo parcialmente	Discordo totalmente	Discordo totalmente
114443850521	428177658	2023-10-23 09:40:39	2023-10-23 09:54:05	189.40.77.130					Aceito os termos acima e concordo em participar da pesquisa.	50+	Masculino	Branca	Fundamental incompleto	Sim, sem vínculo empregatício	De 3 a 6 salários mínimos (R$3.960 a R$7.920)	Sim	Planaltina	SUS e Redes Particulares	Sim	Não							Colesterol alto	Provável	Provável	Provável	Provável	Provável	Provável	Provável	Provável	Provável	Provável	Útil	Útil	Provável	Provável	Provável	Discordo parcialmente	Concordo totalmente	Concordo parcialmente	Concordo totalmente	Concordo totalmente	Concordo totalmente	Concordo parcialmente
114443839097	428177658	2023-10-23 09:31:52	2023-10-23 09:40:27	189.40.77.130					Aceito os termos acima e concordo em participar da pesquisa.	18-25	Masculino	Branca	Superior Incompleto	Sim, sem vínculo empregatício	De 1 a 3 salários mínimos (R$1.320 a R$3.960)	Não	Ceilândia	SUS	Não	Não						Nenhuma condição		Muito provável	Provável	Improvável	Provável	Provável	Provável	Provável	Muito provável	Provável	Improvável	Muito Útil	Útil	Provável	Muito provável	Provável	Não concordo nem discordo	Concordo parcialmente	Concordo parcialmente	Concordo totalmente	Discordo parcialmente	Discordo totalmente	Discordo totalmente
114442482847	428177658	2023-10-20 17:25:53	2023-10-20 17:40:21	177.51.60.19					Aceito os termos acima e concordo em participar da pesquisa.	31-35	Feminino	Parda	Superior Completo	Sim, sem vínculo empregatício	De 10 a 20 salários mínimos (R$13.200 a R$26.400)	Sim	Arniqueira	Redes Particulares	Não	Não						Nenhuma condição		Provável	Provável	Provável	Muito provável	Muito provável	Provável	Muito provável	Muito provável	Muito provável	Improvável	Muito Útil	Útil	Provável	Provável	Improvável	Concordo parcialmente	Concordo parcialmente	Concordo parcialmente	Concordo totalmente	Discordo parcialmente	Discordo totalmente	Discordo totalmente
114442472213	428177658	2023-10-20 17:13:09	2023-10-20 17:25:40	177.51.60.19					Aceito os termos acima e concordo em participar da pesquisa.	26-30	Feminino	Preta	Superior Completo	Sim, com vínculo empregatício	De 3 a 6 salários mínimos (R$3.960 a R$7.920)	Sim	Água Claras	SUS e Redes Particulares	Não	Não						Nenhuma condição		Improvável	Muito improvável	Improvável	Muito provável	Muito provável	Provável	Provável	Muito improvável	Muito provável	Improvável	Muito Útil	Muito Útil	Muito provável	Muito provável	Muito provável	Discordo totalmente	Discordo parcialmente	Discordo parcialmente	Discordo totalmente	Concordo totalmente	Discordo totalmente	Não concordo nem discordo
114442462090	428177658	2023-10-20 17:00:16	2023-10-20 17:11:18	177.51.60.19					Aceito os termos acima e concordo em participar da pesquisa.	26-50	Masculino	Parda	Superior Completo	Sim, com vínculo empregatício	De 6 a 9 salários mínimos (R$7.920 a R$11.880)	Não	Água Claras	Redes Particulares	Não	Não						Nenhuma condição		Muito improvável	Improvável	Muito improvável	Provável	Improvável	Improvável	Provável	Provável	Provável	Muito provável	Muito Útil	Inútil	Provável	Provável	Improvável	Concordo totalmente	Concordo totalmente	Discordo parcialmente	Concordo totalmente	Discordo parcialmente	Discordo parcialmente	Discordo parcialmente
114442453295	428177658	2023-10-20 16:48:46	2023-10-20 17:00:00	177.51.60.19					Aceito os termos acima e concordo em participar da pesquisa.	26-30	Masculino	Branca	Superior Completo	Sim, com vínculo empregatício	De 3 a 6 salários mínimos (R$3.960 a R$7.920)	Não	Água Claras	Redes Particulares	Não	Não						Nenhuma condição		Provável	Provável	Improvável	Provável	Provável	Provável	Muito provável	Muito provável	Muito provável	Provável	Muito Útil	Inútil	Muito provável	Muito provável	Muito improvável	Concordo totalmente	Concordo totalmente	Discordo parcialmente	Concordo totalmente	Discordo totalmente	Discordo totalmente	Discordo totalmente
114442446012	428177658	2023-10-20 16:35:17	2023-10-20 16:50:32	177.41.132.236					Aceito os termos acima e concordo em participar da pesquisa.	26-50	Feminino	Parda	Superior Completo	Sim, com vínculo empregatício	De 3 a 6 salários mínimos (R$3.960 a R$7.920)	Não	Samambaia	SUS e Redes Particulares	Sim	Não						Nenhuma condição		Muito improvável	Provável	Improvável	Improvável	Improvável	Improvável	Provável	Provável	Provável	Improvável	Muito Inútil	Muito Inútil	Provável	Provável	Provável	Concordo parcialmente	Concordo parcialmente	Concordo parcialmente	Concordo parcialmente	Discordo totalmente	Discordo totalmente	Discordo totalmente
114442443458	428177658	2023-10-20 16:40:18	2023-10-20 16:47:25	177.51.60.19					Aceito os termos acima e concordo em participar da pesquisa.	26-50	Feminino	Branca	Superior Incompleto	Sim, com vínculo empregatício	De 3 a 6 salários mínimos (R$3.960 a R$7.920)	Não	Arniqueira	SUS e Redes Particulares	Não	Não			Depressão					Muito improvável	Provável	Muito improvável	Provável	Provável	Improvável	Muito provável	Muito provável	Muito provável	Muito provável	Muito Útil	Inútil	Muito provável	Muito provável	Muito improvável	Concordo totalmente	Concordo totalmente	Discordo totalmente	Concordo totalmente	Concordo parcialmente	Discordo totalmente	Discordo totalmente
114442429770	428177658	2023-10-20 16:21:35	2023-10-20 16:31:37	177.51.60.19					Aceito os termos acima e concordo em participar da pesquisa.	31-35	Feminino	Parda	Ensino Médio completo	Sim, com vínculo empregatício	De 1 a 3 salários mínimos (R$1.320 a R$3.960)	Não	Ceilândia	SUS	Não	Não						Nenhuma condição		Provável	Muito provável	Provável	Provável	Provável	Improvável	Provável	Muito provável	Muito provável	Improvável	Muito Útil	Útil	Muito provável	Muito provável	Improvável	Discordo parcialmente	Concordo parcialmente	Discordo parcialmente	Concordo parcialmente	Discordo parcialmente	Discordo totalmente	Discordo totalmente
114442420498	428177658	2023-10-20 16:04:43	2023-10-20 16:21:06	177.51.60.19					Aceito os termos acima e concordo em participar da pesquisa.	41-45	Feminino	Parda	Ensino Médio completo	Sim, com vínculo empregatício	De 1 a 3 salários mínimos (R$1.320 a R$3.960)	Não	Riacho Fundo 2	SUS	Não	Não						Nenhuma condição		Provável	Provável	Muito provável	Muito provável	Provável	Provável	Provável	Muito provável	Provável	Improvável	Muito Útil	Útil	Provável	Muito provável	Muito provável	Discordo parcialmente	Discordo parcialmente	Concordo totalmente	Concordo parcialmente	Discordo parcialmente	Discordo parcialmente	Discordo parcialmente
114442406453	428177658	2023-10-20 15:48:59	2023-10-20 16:04:22	177.51.60.19					Aceito os termos acima e concordo em participar da pesquisa.	18-25	Masculino	Branca	Ensino Médio Incompleto	Não	Até 1 salário mínimo (R$ 1.320)	Não	Arniqueira	SUS	Não	Não						Nenhuma condição		Muito provável	Muito provável	Muito provável	Muito provável	Muito provável	Muito provável	Muito provável	Muito provável	Improvável	Improvável	Muito Útil	Útil	Muito provável	Muito provável	Provável	Discordo parcialmente	Discordo parcialmente	Concordo parcialmente	Concordo totalmente	Concordo parcialmente	Discordo totalmente	Discordo totalmente
114442391036	428177658	2023-10-20 15:38:40	2023-10-20 15:48:44	177.51.60.19					Aceito os termos acima e concordo em participar da pesquisa.	18-25	Masculino	Parda	Superior Incompleto	Sim, sem vínculo empregatício	De 1 a 3 salários mínimos (R$1.320 a R$3.960)	Não	Água Claras	Redes Particulares	Não	Não						Nenhuma condição		Provável	Provável	Improvável	Provável	Provável	Improvável	Muito provável	Muito provável	Muito provável	Muito provável	Muito Útil	Inútil	Muito provável	Muito provável	Improvável	Concordo parcialmente	Concordo totalmente	Concordo parcialmente	Concordo totalmente	Discordo parcialmente	Discordo totalmente	Discordo totalmente
114442363533	428177658	2023-10-20 15:21:45	2023-10-20 15:31:03	177.51.60.19					Aceito os termos acima e concordo em participar da pesquisa.	26-50	Feminino	Parda	Ensino Médio completo	Sim, sem vínculo empregatício	De 1 a 3 salários mínimos (R$1.320 a R$3.960)	Não	Planaltina	SUS	Sim	Não							Mioma	Provável	Improvável	Provável	Provável	Provável	Provável	Provável	Provável	Provável	Improvável	Útil	Útil	Provável	Provável	Provável	Concordo totalmente	Discordo totalmente	Discordo totalmente	Concordo totalmente	Discordo totalmente	Discordo totalmente	Discordo totalmente
114442349516	428177658	2023-10-20 15:14:15	2023-10-20 15:21:31	177.51.60.19					Aceito os termos acima e concordo em participar da pesquisa.	18-25	Feminino	Branca	Superior Incompleto	Não	De 6 a 9 salários mínimos (R$7.920 a R$11.880)	Não	Recanto Das Emas	Redes Particulares	Não	Não						Nenhuma condição		Muito provável	Muito provável	Muito provável	Provável	Provável	Provável	Provável	Provável	Muito provável	Improvável	Muito Útil	Inútil	Provável	Muito provável	Improvável	Concordo totalmente	Concordo parcialmente	Discordo parcialmente	Concordo totalmente	Discordo totalmente	Discordo totalmente	Discordo totalmente
114442343230	428177658	2023-10-20 15:03:19	2023-10-20 15:13:57	177.51.60.19					Aceito os termos acima e concordo em participar da pesquisa.	18-25	Feminino	Preta	Superior Incompleto	Não	De 6 a 9 salários mínimos (R$7.920 a R$11.880)	Não	Taguatinga	Redes Particulares	Não	Não						Nenhuma condição		Muito provável	Provável	Provável	Provável	Muito provável	Provável	Muito provável	Provável	Provável	Improvável	Muito Útil	Útil	Muito provável	Provável	Provável	Concordo totalmente	Concordo totalmente	Discordo totalmente	Concordo totalmente	Discordo totalmente	Discordo totalmente	Discordo totalmente
114442333726	428177658	2023-10-20 13:51:57	2023-10-20 15:03:04	177.51.60.19					Aceito os termos acima e concordo em participar da pesquisa.	26-30	Feminino	Preta	Superior Completo	Não	Até 1 salário mínimo (R$ 1.320)	Não	Samambaia	SUS e Redes Particulares	Não	Não						Nenhuma condição		Improvável	Improvável	Muito improvável	Provável	Provável	Improvável	Muito provável	Provável	Provável	Provável	Muito Útil	Inútil	Muito provável	Provável	Improvável	Concordo parcialmente	Concordo parcialmente	Concordo parcialmente	Concordo totalmente	Discordo parcialmente	Discordo totalmente	Discordo parcialmente
114442274833	428177658	2023-10-20 13:26:39	2023-10-20 13:51:38	177.51.62.78					Aceito os termos acima e concordo em participar da pesquisa.	26-50	Masculino	Parda	Superior Completo	Sim, sem vínculo empregatício	De 6 a 9 salários mínimos (R$7.920 a R$11.880)	Não	Água Claras	Redes Particulares	Não	Não						Nenhuma condição		Provável	Improvável	Muito improvável	Muito provável	Provável	Provável	Muito provável	Provável	Provável	Improvável	Muito Útil	Inútil	Provável	Provável	Improvável	Concordo totalmente	Concordo parcialmente	Discordo parcialmente	Concordo parcialmente	Concordo parcialmente	Discordo parcialmente	Discordo parcialmente
114442251318	428177658	2023-10-20 13:18:34	2023-10-20 13:26:28	177.51.60.19					Aceito os termos acima e concordo em participar da pesquisa.	18-25	Feminino	Parda	Ensino Médio completo	Não	Até 1 salário mínimo (R$ 1.320)	Não	Água Claras	Redes Particulares	Não	Não						Nenhuma condição		Provável	Provável	Provável	Muito provável	Provável	Provável	Muito provável	Provável	Muito provável	Improvável	Muito Útil	Útil	Provável	Muito provável	Provável	Discordo parcialmente	Concordo parcialmente	Discordo totalmente	Concordo parcialmente	Discordo totalmente	Discordo totalmente	Discordo totalmente
114442167216	428177658	2023-10-20 11:53:18	2023-10-20 12:03:07	177.51.62.66					Aceito os termos acima e concordo em participar da pesquisa.	18-25	Masculino	Parda	Superior Incompleto	Sim, com vínculo empregatício	De 1 a 3 salários mínimos (R$1.320 a R$3.960)	Não	Samambaia	SUS e Redes Particulares	Não	Não						Nenhuma condição		Improvável	Muito provável	Provável	Provável	Provável	Provável	Muito provável	Muito provável	Improvável	Muito provável	Muito Útil	Útil	Provável	Muito provável	Provável	Concordo totalmente	Concordo parcialmente	Concordo parcialmente	Concordo totalmente	Concordo parcialmente	Discordo totalmente	Discordo totalmente
114442156997	428177658	2023-10-20 11:39:58	2023-10-20 11:53:03	177.51.60.76					Aceito os termos acima e concordo em participar da pesquisa.	36-40	Masculino	Branca	Superior Completo	Sim, sem vínculo empregatício	De 6 a 9 salários mínimos (R$7.920 a R$11.880)	Sim	Água Claras	SUS e Redes Particulares	Não	Não						Nenhuma condição		Improvável	Provável	Muito improvável	Provável	Provável	Muito improvável	Provável	Muito provável	Muito provável	Improvável	Muito Útil	Inútil	Provável	Muito provável	Muito improvável	Concordo totalmente	Concordo totalmente	Concordo parcialmente	Concordo totalmente	Discordo parcialmente	Discordo parcialmente	Discordo totalmente
114442144298	428177658	2023-10-20 11:27:53	2023-10-20 11:39:39	177.51.62.66					Aceito os termos acima e concordo em participar da pesquisa.	50+	Feminino	Branca	Superior Completo	Não	De 1 a 3 salários mínimos (R$1.320 a R$3.960)	Não	Água Claras	SUS e Redes Particulares	Sim	Não	Hipertensão/pressão alta							Provável	Muito provável	Provável	Provável	Provável	Provável	Muito provável	Muito provável	Muito provável	Muito improvável	Muito Útil	Útil	Muito provável	Provável	Improvável	Concordo parcialmente	Discordo parcialmente	Discordo parcialmente	Concordo parcialmente	Discordo totalmente	Discordo totalmente	Discordo parcialmente
114442128955	428177658	2023-10-20 11:16:13	2023-10-20 11:24:08	177.51.62.66					Aceito os termos acima e concordo em participar da pesquisa.	18-25	Feminino	Branca	Ensino Médio Incompleto	Não	Até 1 salário mínimo (R$ 1.320)	Não	Água Claras	SUS e Redes Particulares	Não	Não						Nenhuma condição		Provável	Provável	Provável	Provável	Provável	Provável	Provável	Provável	Muito provável	Provável	Muito Útil	Útil	Provável	Muito provável	Improvável	Discordo parcialmente	Concordo totalmente	Discordo parcialmente	Concordo parcialmente	Discordo totalmente	Discordo totalmente	Discordo totalmente
114442103141	428177658	2023-10-20 10:44:59	2023-10-20 10:56:20	177.51.62.66					Aceito os termos acima e concordo em participar da pesquisa.	41-45	Masculino	Parda	Superior Completo	Sim, com vínculo empregatício	De 6 a 9 salários mínimos (R$7.920 a R$11.880)	Sim	Água Claras	SUS e Redes Particulares	Não	Não						Nenhuma condição		Provável	Provável	Muito provável	Provável	Muito provável	Improvável	Provável	Provável	Improvável	Improvável	Útil	Útil	Provável	Provável	Improvável	Concordo totalmente	Concordo totalmente	Concordo totalmente	Concordo totalmente	Discordo totalmente	Discordo totalmente	Discordo totalmente
114442092367	428177658	2023-10-20 10:23:41	2023-10-20 10:44:19	177.51.62.66					Aceito os termos acima e concordo em participar da pesquisa.	31-35	Feminino	Branca	Superior Completo	Sim, sem vínculo empregatício	De 6 a 9 salários mínimos (R$7.920 a R$11.880)	Sim	Água Claras	SUS e Redes Particulares	Sim	Não							Transtorno depressivo	Provável	Muito provável	Provável	Muito provável	Muito provável	Provável	Muito provável	Provável	Muito provável	Improvável	Muito Útil	Inútil	Provável	Muito provável	Muito improvável	Concordo totalmente	Não concordo nem discordo	Concordo parcialmente	Concordo totalmente	Discordo totalmente	Discordo totalmente	Discordo totalmente
114442073434	428177658	2023-10-20 10:14:56	2023-10-20 10:23:22	177.51.62.66					Aceito os termos acima e concordo em participar da pesquisa.	31-35	Feminino	Parda	Ensino Médio completo	Sim, sem vínculo empregatício	De 1 a 3 salários mínimos (R$1.320 a R$3.960)	Não	Taguatinga	SUS	Não	Não						Nenhuma condição		Provável	Provável	Improvável	Provável	Provável	Improvável	Provável	Muito provável	Provável	Improvável	Muito Útil	Inútil	Provável	Muito provável	Provável	Concordo parcialmente	Concordo parcialmente	Discordo parcialmente	Concordo parcialmente	Concordo parcialmente	Discordo parcialmente	Discordo totalmente
114442065364	428177658	2023-10-20 10:03:25	2023-10-20 10:14:40	177.51.62.66					Aceito os termos acima e concordo em participar da pesquisa.	31-35	Feminino	Branca	Superior Completo	Não	De 1 a 3 salários mínimos (R$1.320 a R$3.960)	Não	Água Claras	Redes Particulares	Sim	Não			Depressão					Provável	Muito provável	Muito provável	Provável	Provável	Provável	Muito improvável	Muito provável	Muito provável	Improvável	Muito Útil	Útil	Provável	Provável	Provável	Concordo totalmente	Discordo parcialmente	Discordo parcialmente	Concordo totalmente	Concordo parcialmente	Discordo totalmente	Discordo totalmente
114442054374	428177658	2023-10-20 09:48:19	2023-10-20 10:02:37	177.51.60.81					Aceito os termos acima e concordo em participar da pesquisa.	41-45	Feminino	Branca	Superior Completo	Não	De 6 a 9 salários mínimos (R$7.920 a R$11.880)	Não	Água Claras	Redes Particulares	Sim	Não			Depressão					Improvável	Muito provável	Muito provável	Provável	Muito provável	Provável	Provável	Muito provável	Muito provável	Improvável	Muito Útil	Inútil	Muito provável	Muito provável	Improvável	Concordo totalmente	Concordo totalmente	Discordo parcialmente	Concordo totalmente	Discordo totalmente	Discordo totalmente	Discordo totalmente
114442042267	428177658	2023-10-20 09:29:13	2023-10-20 09:48:03	177.51.60.121					Aceito os termos acima e concordo em participar da pesquisa.	18-25	Feminino	Parda	Fundamental incompleto	Sim, sem vínculo empregatício	De 1 a 3 salários mínimos (R$1.320 a R$3.960)	Não	Samambaia	SUS	Não	Não						Nenhuma condição		Provável	Muito provável	Muito provável	Provável	Provável	Provável	Provável	Provável	Provável	Improvável	Útil	Útil	Provável	Provável	Provável	Discordo parcialmente	Discordo totalmente	Concordo parcialmente	Concordo parcialmente	Concordo totalmente	Concordo totalmente	Discordo totalmente
114442026661	428177658	2023-10-20 09:17:13	2023-10-20 09:28:55	177.51.62.66					Aceito os termos acima e concordo em participar da pesquisa.	36-40	Masculino	Preta	Superior Completo	Sim, com vínculo empregatício	De 10 a 20 salários mínimos (R$13.200 a R$26.400)	Não	Água Claras	Redes Particulares	Não	Não						Nenhuma condição		Provável	Muito provável	Muito provável	Muito provável	Muito provável	Provável	Muito provável	Muito provável	Muito provável	Muito improvável	Muito Útil	Inútil	Provável	Provável	Improvável	Concordo totalmente	Concordo parcialmente	Discordo parcialmente	Concordo totalmente	Discordo totalmente	Discordo totalmente	Discordo totalmente
114441526211	428177658	2023-10-19 18:18:56	2023-10-19 18:35:44	189.40.76.219					Aceito os termos acima e concordo em participar da pesquisa.	18-25	Masculino	Parda	Superior Completo	Sim, com vínculo empregatício	De 1 a 3 salários mínimos (R$1.320 a R$3.960)	Não	São Sebastião	SUS e Redes Particulares	Não	Não						Nenhuma condição		Muito provável	Provável	Provável	Provável	Muito provável	Provável	Provável	Muito provável	Provável	Improvável	Muito Útil	Útil	Provável	Muito provável	Improvável	Concordo parcialmente	Concordo parcialmente	Discordo parcialmente	Discordo parcialmente	Discordo totalmente	Discordo totalmente	Discordo parcialmente
114441513651	428177658	2023-10-19 18:11:19	2023-10-19 18:18:43	189.40.76.219					Aceito os termos acima e concordo em participar da pesquisa.	41-45	Feminino	Parda	Ensino Médio Incompleto	Sim, sem vínculo empregatício	De 1 a 3 salários mínimos (R$1.320 a R$3.960)	Sim	Guará	SUS e Redes Particulares	Não	Não						Nenhuma condição		Improvável	Improvável	Improvável	Provável	Improvável	Improvável	Provável	Muito provável	Muito improvável	Muito improvável	Útil	Inútil	Improvável	Improvável	Muito improvável	Concordo parcialmente	Discordo parcialmente	Concordo parcialmente	Discordo parcialmente	Concordo parcialmente	Concordo parcialmente	Concordo parcialmente
114441507406	428177658	2023-10-19 17:41:07	2023-10-19 18:10:29	189.40.76.219					Aceito os termos acima e concordo em participar da pesquisa.	41-45	Feminino	Parda	Ensino Médio completo	Não	Até 1 salário mínimo (R$ 1.320)	Sim	Samambaia	SUS	Sim	Não			Depressão					Muito provável	Improvável	Improvável	Provável	Muito provável	Muito improvável	Muito provável	Muito provável	Muito improvável	Improvável	Muito Útil	Inútil	Improvável	Improvável	Muito improvável	Concordo totalmente	Discordo parcialmente	Concordo parcialmente	Concordo totalmente	Discordo parcialmente	Discordo totalmente	Discordo totalmente
114441492759	428177658	2023-10-19 17:41:07	2023-10-19 17:52:25	189.40.78.50					Aceito os termos acima e concordo em participar da pesquisa.	41-45	Feminino	Parda	Ensino Médio completo	Não	Até 1 salário mínimo (R$ 1.320)	Sim	Samambaia	SUS	Sim	Não			Depressão					Muito provável	Improvável	Improvável	Provável	Muito provável	Muito improvável	Muito provável	Muito provável	Muito improvável	Improvável	Muito Útil	Inútil	Improvável	Improvável	Muito improvável	Concordo totalmente	Discordo parcialmente	Concordo parcialmente	Concordo totalmente	Discordo parcialmente	Discordo totalmente	Discordo totalmente
114441483121	428177658	2023-10-19 17:30:53	2023-10-19 17:40:47	189.40.78.50					Aceito os termos acima e concordo em participar da pesquisa.	36-40	Masculino	Parda	Superior Incompleto	Sim, com vínculo empregatício	De 1 a 3 salários mínimos (R$1.320 a R$3.960)	Não	Samambaia	SUS	Não	Não						Nenhuma condição		Provável	Provável	Provável	Provável	Provável	Provável	Provável	Provável	Improvável	Provável	Muito Útil	Útil	Provável	Muito provável	Provável	Discordo totalmente	Discordo totalmente	Concordo totalmente	Concordo parcialmente	Discordo totalmente	Discordo totalmente	Discordo totalmente
114441474526	428177658	2023-10-19 17:21:17	2023-10-19 17:30:36	189.40.78.50					Aceito os termos acima e concordo em participar da pesquisa.	18-25	Masculino	Preta	Ensino Médio completo	Sim, com vínculo empregatício	De 1 a 3 salários mínimos (R$1.320 a R$3.960)	Não	Gama	SUS	Não	Não						Nenhuma condição		Provável	Improvável	Provável	Muito provável	Muito provável	Improvável	Muito provável	Provável	Muito provável	Improvável	Muito Útil	Útil	Provável	Muito provável	Improvável	Concordo totalmente	Concordo totalmente	Concordo parcialmente	Concordo totalmente	Discordo parcialmente	Discordo parcialmente	Discordo totalmente
114441465906	428177658	2023-10-19 17:08:13	2023-10-19 17:20:47	189.40.78.50					Aceito os termos acima e concordo em participar da pesquisa.	18-25	Feminino	Preta	Superior Incompleto	Não	De 3 a 6 salários mínimos (R$3.960 a R$7.920)	Não	Samambaia	SUS	Não	Não						Nenhuma condição		Provável	Provável	Improvável	Provável	Provável	Provável	Muito provável	Muito provável	Muito provável	Muito improvável	Muito Útil	Inútil	Improvável	Provável	Improvável	Discordo parcialmente	Concordo totalmente	Concordo totalmente	Concordo totalmente	Discordo totalmente	Discordo totalmente	Discordo parcialmente
114441454219	428177658	2023-10-19 16:51:19	2023-10-19 17:07:50	189.40.78.50					Aceito os termos acima e concordo em participar da pesquisa.	18-25	Feminino	Parda	Ensino Médio completo	Sim, com vínculo empregatício	De 1 a 3 salários mínimos (R$1.320 a R$3.960)	Não	Ceilândia	SUS	Não	Não						Nenhuma condição		Provável	Provável	Improvável	Muito provável	Muito provável	Improvável	Provável	Muito provável	Improvável	Improvável	Útil	Muito Útil	Muito provável	Muito provável	Improvável	Discordo parcialmente	Discordo parcialmente	Concordo totalmente	Concordo totalmente	Não concordo nem discordo	Discordo parcialmente	Discordo parcialmente
114441438635	428177658	2023-10-19 16:40:38	2023-10-19 16:51:08	189.40.78.50					Aceito os termos acima e concordo em participar da pesquisa.	18-25	Feminino	Branca	Superior Incompleto	Sim, sem vínculo empregatício	Até 1 salário mínimo (R$ 1.320)	Sim	Ceilândia	Redes Particulares	Não	Não						Nenhuma condição		Improvável	Improvável	Improvável	Provável	Provável	Muito improvável	Improvável	Provável	Muito provável	Improvável	Muito Útil	Inútil	Provável	Improvável	Muito improvável	Concordo totalmente	Discordo totalmente	Discordo totalmente	Concordo parcialmente	Discordo totalmente	Discordo parcialmente	Discordo totalmente
114441429218	428177658	2023-10-19 16:31:53	2023-10-19 16:40:13	189.40.78.50					Aceito os termos acima e concordo em participar da pesquisa.	18-25	Masculino	Parda	Superior Incompleto	Sim, com vínculo empregatício	De 1 a 3 salários mínimos (R$1.320 a R$3.960)	Não	Itapoã	Redes Particulares	Não	Não						Nenhuma condição		Provável	Muito provável	Muito provável	Muito provável	Muito provável	Provável	Provável	Muito provável	Improvável	Muito provável	Muito Útil	Útil	Muito provável	Muito provável	Provável	Concordo totalmente	Concordo totalmente	Discordo parcialmente	Concordo totalmente	Discordo totalmente	Discordo totalmente	Discordo totalmente
114441420713	428177658	2023-10-19 16:22:30	2023-10-19 16:31:06	189.40.78.50					Aceito os termos acima e concordo em participar da pesquisa.	26-30	Masculino	Parda	Ensino Médio completo	Sim, com vínculo empregatício	De 1 a 3 salários mínimos (R$1.320 a R$3.960)	Não	Planaltina	SUS e Redes Particulares	Não	Não						Nenhuma condição		Provável	Provável	Provável	Muito provável	Muito provável	Provável	Provável	Provável	Provável	Improvável	Muito Útil	Inútil	Provável	Muito provável	Improvável	Concordo totalmente	Concordo totalmente	Discordo parcialmente	Concordo totalmente	Discordo parcialmente	Discordo parcialmente	Discordo totalmente
114441391322	428177658	2023-10-19 15:41:40	2023-10-19 16:00:11	189.40.78.50					Aceito os termos acima e concordo em participar da pesquisa.	41-45	Feminino	Parda	Ensino Médio completo	Sim, sem vínculo empregatício	De 1 a 3 salários mínimos (R$1.320 a R$3.960)	Sim	Núcleo Bandeirante	SUS e Redes Particulares	Não	Não						Nenhuma condição		Provável	Provável	Provável	Provável	Provável	Muito provável	Muito provável	Provável	Muito provável	Provável	Muito Útil	Útil	Provável	Provável	Provável	Concordo totalmente	Discordo totalmente	Concordo parcialmente	Concordo totalmente	Concordo parcialmente	Discordo parcialmente	Discordo totalmente
114441372649	428177658	2023-10-19 15:28:18	2023-10-19 15:41:26	189.40.78.50					Aceito os termos acima e concordo em participar da pesquisa.	26-30	Feminino	Parda	Ensino Médio completo	Sim, com vínculo empregatício	De 1 a 3 salários mínimos (R$1.320 a R$3.960)	Sim	Ceilândia	SUS e Redes Particulares	Não	Não						Nenhuma condição		Provável	Provável	Provável	Provável	Provável	Provável	Muito provável	Muito provável	Muito provável	Provável	Útil	Útil	Provável	Provável	Improvável	Discordo parcialmente	Concordo parcialmente	Concordo totalmente	Concordo parcialmente	Concordo parcialmente	Discordo parcialmente	Concordo parcialmente
114441358872	428177658	2023-10-19 15:17:55	2023-10-19 15:28:09	189.40.78.50					Aceito os termos acima e concordo em participar da pesquisa.	50+	Feminino	Parda	Superior Completo	Sim, com vínculo empregatício	De 3 a 6 salários mínimos (R$3.960 a R$7.920)	Sim	Park Way	SUS e Redes Particulares	Sim	Não						Nenhuma condição		Provável	Muito provável	Muito provável	Provável	Provável	Improvável	Provável	Muito provável	Improvável	Improvável	Muito Útil	Inútil	Improvável	Muito provável	Provável	Concordo totalmente	Concordo parcialmente	Concordo parcialmente	Concordo totalmente	Discordo totalmente	Discordo totalmente	Discordo totalmente
114441348276	428177658	2023-10-19 15:06:45	2023-10-19 15:17:40	189.40.78.50					Aceito os termos acima e concordo em participar da pesquisa.	41-45	Feminino	Parda	Ensino Médio completo	Sim, com vínculo empregatício	De 1 a 3 salários mínimos (R$1.320 a R$3.960)	Sim	Planaltina	SUS	Não	Não						Nenhuma condição		Provável	Provável	Provável	Provável	Provável	Improvável	Muito provável	Provável	Provável	Improvável	Muito Útil	Útil	Provável	Provável	Improvável	Discordo parcialmente	Concordo totalmente	Concordo totalmente	Concordo totalmente	Discordo totalmente	Concordo totalmente	Discordo totalmente
114441336485	428177658	2023-10-19 14:55:50	2023-10-19 15:06:32	189.40.78.50					Aceito os termos acima e concordo em participar da pesquisa.	18-25	Masculino	Preta	Ensino Médio completo	Não	De 1 a 3 salários mínimos (R$1.320 a R$3.960)	Não	Planaltina	SUS	Não	Não						Nenhuma condição		Improvável	Muito provável	Improvável	Provável	Improvável	Improvável	Provável	Muito provável	Muito provável	Provável	Muito Útil	Muito Inútil	Provável	Improvável	Muito improvável	Concordo parcialmente	Concordo parcialmente	Concordo parcialmente	Concordo totalmente	Concordo parcialmente	Concordo parcialmente	Discordo totalmente
114441325025	428177658	2023-10-19 14:43:01	2023-10-19 14:55:37	189.40.78.50					Aceito os termos acima e concordo em participar da pesquisa.	26-30	Feminino	Preta	Ensino Médio completo	Não	Até 1 salário mínimo (R$ 1.320)	Não	Gama	SUS e Redes Particulares	Não	Não						Nenhuma condição		Muito provável	Muito provável	Muito provável	Provável	Provável	Muito provável	Muito provável	Muito provável	Muito provável	Improvável	Muito Útil	Útil	Provável	Muito provável	Muito provável	Discordo parcialmente	Concordo parcialmente	Concordo totalmente	Concordo totalmente	Discordo totalmente	Discordo totalmente	Discordo totalmente
114441311965	428177658	2023-10-19 14:30:57	2023-10-19 14:42:41	189.40.78.50					Aceito os termos acima e concordo em participar da pesquisa.	50+	Feminino	Branca	Fundamental incompleto	Sim, sem vínculo empregatício	De 1 a 3 salários mínimos (R$1.320 a R$3.960)	Sim	São Sebastião	SUS e Redes Particulares	Sim	Não						Nenhuma condição		Provável	Provável	Provável	Provável	Provável	Provável	Muito provável	Provável	Muito provável	Improvável	Muito Útil	Útil	Provável	Provável	Improvável	Concordo totalmente	Concordo totalmente	Concordo totalmente	Concordo totalmente	Discordo totalmente	Discordo totalmente	Discordo totalmente
114441300027	428177658	2023-10-19 13:15:59	2023-10-19 14:30:31	189.40.78.50					Aceito os termos acima e concordo em participar da pesquisa.	18-25	Feminino	Preta	Ensino Médio completo	Sim, com vínculo empregatício	De 1 a 3 salários mínimos (R$1.320 a R$3.960)	Não	Itapoã	SUS	Não	Não						Nenhuma condição		Provável	Provável	Provável	Provável	Provável	Provável	Provável	Provável	Provável	Improvável	Útil	Útil	Provável	Provável	Improvável	Discordo totalmente	Concordo parcialmente	Concordo parcialmente	Concordo parcialmente	Concordo parcialmente	Discordo parcialmente	Concordo parcialmente
114441223911	428177658	2023-10-19 12:58:00	2023-10-19 13:15:49	189.40.78.32					Aceito os termos acima e concordo em participar da pesquisa.	18-25	Feminino	Branca	Ensino Médio Incompleto	Sim, com vínculo empregatício	Até 1 salário mínimo (R$ 1.320)	Não	Paranoá	SUS e Redes Particulares	Não	Não				Doenças cardiovasculares como infarto, derrame ou insuficiência cardíaca			Eu tive Sopro no coração	Provável	Muito improvável	Muito improvável	Provável	Provável	Muito improvável	Provável	Improvável	Muito improvável	Improvável	Útil	Útil	Provável	Provável	Muito improvável	Concordo totalmente	Concordo totalmente	Concordo totalmente	Concordo totalmente	Não concordo nem discordo	Não concordo nem discordo	Discordo totalmente
114441195841	428177658	2023-10-19 12:42:47	2023-10-19 12:57:49	177.51.62.47					Aceito os termos acima e concordo em participar da pesquisa.	31-35	Feminino	Parda	Superior Completo	Sim, com vínculo empregatício	De 6 a 9 salários mínimos (R$7.920 a R$11.880)	Sim	Samambaia	Redes Particulares	Sim	Não						Nenhuma condição		Provável	Provável	Provável	Provável	Provável	Provável	Provável	Improvável	Improvável	Provável	Muito Útil	Inútil	Provável	Provável	Provável	Concordo totalmente	Concordo parcialmente	Não concordo nem discordo	Concordo totalmente	Discordo totalmente	Discordo totalmente	Discordo totalmente
114441186600	428177658	2023-10-19 12:31:59	2023-10-19 12:42:25	189.40.77.251					Aceito os termos acima e concordo em participar da pesquisa.	18-25	Feminino	Preta	Superior Incompleto	Sim, com vínculo empregatício	De 1 a 3 salários mínimos (R$1.320 a R$3.960)	Não	Santa Maria	SUS	Não	Não						Nenhuma condição		Provável	Provável	Muito provável	Provável	Provável	Provável	Provável	Muito provável	Muito provável	Improvável	Muito Útil	Útil	Provável	Provável	Provável	Concordo totalmente	Concordo totalmente	Discordo parcialmente	Concordo totalmente	Discordo totalmente	Discordo totalmente	Discordo parcialmente
114441171005	428177658	2023-10-19 12:18:30	2023-10-19 12:29:03	189.40.77.251					Aceito os termos acima e concordo em participar da pesquisa.	26-50	Feminino	Parda	Superior Completo	Sim, com vínculo empregatício	De 3 a 6 salários mínimos (R$3.960 a R$7.920)	Não	Gama	SUS e Redes Particulares	Não	Não						Nenhuma condição		Improvável	Muito provável	Improvável	Muito provável	Muito provável	Improvável	Provável	Provável	Provável	Improvável	Muito Útil	Útil	Improvável	Provável	Improvável	Discordo parcialmente	Concordo parcialmente	Discordo parcialmente	Concordo parcialmente	Concordo parcialmente	Discordo parcialmente	Concordo parcialmente
114441158700	428177658	2023-10-19 12:05:26	2023-10-19 12:18:13	189.40.77.251					Aceito os termos acima e concordo em participar da pesquisa.	18-25	Masculino	Preta	Superior Incompleto	Sim, sem vínculo empregatício	De 1 a 3 salários mínimos (R$1.320 a R$3.960)	Não	Planaltina	SUS	Não	Não						Nenhuma condição		Improvável	Muito provável	Muito provável	Provável	Provável	Provável	Muito provável	Muito provável	Provável	Provável	Muito Útil	Inútil	Provável	Provável	Improvável	Discordo parcialmente	Concordo parcialmente	Discordo totalmente	Discordo parcialmente	Discordo totalmente	Discordo totalmente	Discordo totalmente
114441143608	428177658	2023-10-19 11:50:26	2023-10-19 12:05:15	189.40.77.251					Aceito os termos acima e concordo em participar da pesquisa.	50+	Feminino	Preta	Superior Completo	Sim, com vínculo empregatício	De 3 a 6 salários mínimos (R$3.960 a R$7.920)	Não	Ceilândia	SUS e Redes Particulares	Sim	Não							Glaucoma	Provável	Muito provável	Provável	Muito provável	Muito provável	Provável	Provável	Provável	Muito provável	Improvável	Muito Útil	Útil	Provável	Muito provável	Provável	Concordo parcialmente	Concordo totalmente	Concordo totalmente	Concordo totalmente	Discordo parcialmente	Discordo totalmente	Discordo totalmente
114441126928	428177658	2023-10-19 11:38:19	2023-10-19 11:50:15	189.40.77.251					Aceito os termos acima e concordo em participar da pesquisa.	18-25	Feminino	Parda	Superior Incompleto	Não	Até 1 salário mínimo (R$ 1.320)	Não	Planaltina	SUS e Redes Particulares	Não	Não						Nenhuma condição		Improvável	Improvável	Improvável	Provável	Muito provável	Muito improvável	Muito provável	Muito provável	Muito provável	Muito provável	Muito Útil	Inútil	Muito provável	Muito provável	Improvável	Concordo totalmente	Discordo totalmente	Discordo totalmente	Concordo totalmente	Discordo totalmente	Discordo totalmente	Discordo totalmente
114441113968	428177658	2023-10-19 11:26:42	2023-10-19 11:38:06	189.40.77.251					Aceito os termos acima e concordo em participar da pesquisa.	18-25	Feminino	Branca	Superior Incompleto	Sim, com vínculo empregatício	Até 1 salário mínimo (R$ 1.320)	Não	Sudoeste/Octogonal	Redes Particulares	Não	Não						Nenhuma condição		Provável	Provável	Provável	Provável	Provável	Provável	Provável	Muito provável	Improvável	Improvável	Muito Útil	Útil	Provável	Muito provável	Muito provável	Concordo totalmente	Concordo totalmente	Discordo totalmente	Concordo totalmente	Concordo parcialmente	Discordo totalmente	Discordo totalmente
114441098677	428177658	2023-10-19 11:13:31	2023-10-19 11:23:40	189.40.77.251					Aceito os termos acima e concordo em participar da pesquisa.	26-30	Feminino	Preta	Ensino Médio completo	Sim, com vínculo empregatício	De 1 a 3 salários mínimos (R$1.320 a R$3.960)	Não	Recanto Das Emas	SUS e Redes Particulares	Não	Não						Nenhuma condição		Provável	Provável	Provável	Provável	Provável	Provável	Provável	Provável	Improvável	Improvável	Útil	Inútil	Provável	Provável	Improvável	Discordo parcialmente	Concordo parcialmente	Concordo totalmente	Concordo parcialmente	Concordo parcialmente	Discordo totalmente	Discordo totalmente
114441085373	428177658	2023-10-19 11:02:26	2023-10-19 11:10:22	189.40.77.251					Aceito os termos acima e concordo em participar da pesquisa.	36-40	Feminino	Branca	Ensino Médio completo	Sim, com vínculo empregatício	De 1 a 3 salários mínimos (R$1.320 a R$3.960)	Não	Santa Maria	Redes Particulares	Não	Não						Nenhuma condição		Improvável	Provável	Provável	Provável	Provável	Improvável	Muito provável	Provável	Muito provável	Improvável	Muito Útil	Útil	Provável	Provável	Provável	Concordo parcialmente	Concordo totalmente	Concordo totalmente	Concordo totalmente	Discordo totalmente	Discordo totalmente	Discordo totalmente
114441076561	428177658	2023-10-19 10:50:36	2023-10-19 11:01:59	189.40.77.251					Aceito os termos acima e concordo em participar da pesquisa.	31-35	Masculino	Parda	Ensino Médio completo	Sim, com vínculo empregatício	De 1 a 3 salários mínimos (R$1.320 a R$3.960)	Sim	Paranoá	SUS e Redes Particulares	Não	Não						Nenhuma condição		Provável	Provável	Provável	Muito provável	Muito provável	Improvável	Muito provável	Muito provável	Provável	Improvável	Muito Útil	Inútil	Provável	Muito provável	Provável	Concordo totalmente	Concordo parcialmente	Concordo totalmente	Concordo totalmente	Discordo parcialmente	Discordo totalmente	Discordo totalmente
114441064272	428177658	2023-10-19 10:41:24	2023-10-19 10:50:14	189.40.77.251					Aceito os termos acima e concordo em participar da pesquisa.	18-25	Masculino	Preta	Ensino Médio completo	Sim, com vínculo empregatício	De 3 a 6 salários mínimos (R$3.960 a R$7.920)	Não	Jardim Botânico	Redes Particulares	Não	Não						Nenhuma condição		Improvável	Improvável	Provável	Provável	Provável	Improvável	Provável	Provável	Provável	Improvável	Útil	Muito Inútil	Provável	Provável	Provável	Concordo parcialmente	Concordo parcialmente	Concordo totalmente	Concordo totalmente	Concordo parcialmente	Concordo parcialmente	Discordo totalmente
114441055999	428177658	2023-10-19 10:31:40	2023-10-19 10:42:21	189.40.79.159					Aceito os termos acima e concordo em participar da pesquisa.	18-25	Masculino	Parda	Superior Incompleto	Sim, sem vínculo empregatício	Até 1 salário mínimo (R$ 1.320)	Não	Guará	SUS e Redes Particulares	Não	Não						Nenhuma condição		Provável	Muito provável	Provável	Provável	Provável	Provável	Provável	Muito provável	Improvável	Improvável	Muito Útil	Muito Inútil	Muito provável	Muito provável	Muito improvável	Discordo totalmente	Não concordo nem discordo	Discordo totalmente	Concordo parcialmente	Discordo totalmente	Discordo totalmente	Discordo totalmente
114441054767	428177658	2023-10-19 10:30:43	2023-10-19 10:41:12	189.40.77.251					Aceito os termos acima e concordo em participar da pesquisa.	18-25	Feminino	Parda	Superior Incompleto	Não	De 1 a 3 salários mínimos (R$1.320 a R$3.960)	Não	Recanto Das Emas	SUS e Redes Particulares	Não	Não						Nenhuma condição		Improvável	Provável	Muito improvável	Muito provável	Provável	Provável	Provável	Provável	Provável	Provável	Útil	Útil	Provável	Muito improvável	Improvável	Concordo totalmente	Concordo totalmente	Discordo totalmente	Concordo totalmente	Discordo totalmente	Discordo totalmente	Discordo totalmente
114441043934	428177658	2023-10-19 10:20:15	2023-10-19 10:30:31	189.40.77.251					Aceito os termos acima e concordo em participar da pesquisa.	18-25	Feminino	Preta	Superior Incompleto	Sim, com vínculo empregatício	De 1 a 3 salários mínimos (R$1.320 a R$3.960)	Não	Guará	SUS e Redes Particulares	Não	Não						Nenhuma condição		Muito provável	Muito provável	Provável	Improvável	Provável	Improvável	Provável	Provável	Muito provável	Muito improvável	Muito Útil	Inútil	Provável	Provável	Improvável	Concordo totalmente	Discordo parcialmente	Concordo totalmente	Concordo parcialmente	Discordo parcialmente	Discordo totalmente	Discordo totalmente
114441032601	428177658	2023-10-19 10:09:17	2023-10-19 10:19:50	189.40.77.251					Aceito os termos acima e concordo em participar da pesquisa.	41-45	Feminino	Parda	Superior Incompleto	Sim, sem vínculo empregatício	Até 1 salário mínimo (R$ 1.320)	Não	Recanto Das Emas	SUS	Não	Não						Nenhuma condição		Muito provável	Provável	Provável	Provável	Muito provável	Provável	Muito provável	Muito provável	Provável	Improvável	Muito Útil	Muito Útil	Provável	Provável	Muito provável	Concordo parcialmente	Concordo totalmente	Concordo parcialmente	Concordo totalmente	Concordo totalmente	Discordo totalmente	Discordo totalmente
114441021974	428177658	2023-10-19 09:58:59	2023-10-19 10:09:01	189.40.77.251					Aceito os termos acima e concordo em participar da pesquisa.	18-25	Feminino	Branca	Ensino Médio completo	Não	De 1 a 3 salários mínimos (R$1.320 a R$3.960)	Não	Recanto Das Emas	SUS	Não	Não						Nenhuma condição		Provável	Provável	Provável	Provável	Provável	Provável	Provável	Muito provável	Muito provável	Improvável	Muito Útil	Útil	Provável	Improvável	Provável	Discordo parcialmente	Concordo totalmente	Concordo parcialmente	Concordo parcialmente	Discordo parcialmente	Discordo parcialmente	Discordo totalmente
114441014177	428177658	2023-10-19 09:44:27	2023-10-19 10:01:27	191.56.48.190					Aceito os termos acima e concordo em participar da pesquisa.	26-30	Masculino	Preta	Superior Completo	Sim, sem vínculo empregatício	De 1 a 3 salários mínimos (R$1.320 a R$3.960)	Não	Santa Maria	SUS	Não	Não						Nenhuma condição		Improvável	Provável	Improvável	Muito provável	Muito provável	Improvável	Provável	Provável	Muito provável	Improvável	Muito Útil	Inútil	Provável	Muito provável	Muito improvável	Não concordo nem discordo	Concordo parcialmente	Concordo parcialmente	Concordo parcialmente	Discordo totalmente	Discordo totalmente	Discordo totalmente
114441011679	428177658	2023-10-19 09:40:53	2023-10-19 09:58:45	189.40.77.251					Aceito os termos acima e concordo em participar da pesquisa.	31-35	Masculino	Parda	Superior Completo	Sim, sem vínculo empregatício	De 3 a 6 salários mínimos (R$3.960 a R$7.920)	Sim	Santa Maria	SUS	Não	Não						Nenhuma condição		Provável	Muito provável	Provável	Provável	Muito provável	Provável	Muito provável	Muito provável	Muito improvável	Improvável	Muito Útil	Útil	Provável	Muito provável	Improvável	Discordo parcialmente	Não concordo nem discordo	Discordo parcialmente	Concordo parcialmente	Discordo totalmente	Discordo totalmente	Discordo parcialmente
114441008171	428177658	2023-10-19 09:44:59	2023-10-19 09:55:12	191.56.49.103					Aceito os termos acima e concordo em participar da pesquisa.	18-25	Feminino	Parda	Ensino Médio completo	Não	De 10 a 20 salários mínimos (R$13.200 a R$26.400)	Não	Jardim Botânico	SUS e Redes Particulares	Não	Não						Nenhuma condição		Provável	Provável	Muito improvável	Provável	Muito provável	Provável	Provável	Provável	Improvável	Improvável	Muito Útil	Muito Útil	Provável	Provável	Provável	Concordo totalmente	Concordo totalmente	Concordo parcialmente	Concordo totalmente	Discordo totalmente	Discordo totalmente	Não concordo nem discordo
114440995358	428177658	2023-10-19 09:31:18	2023-10-19 09:40:38	189.40.77.251					Aceito os termos acima e concordo em participar da pesquisa.	18-25	Feminino	Parda	Superior Completo	Sim, sem vínculo empregatício	De 1 a 3 salários mínimos (R$1.320 a R$3.960)	Não	Riacho Fundo 2	SUS	Não	Não						Nenhuma condição		Provável	Provável	Improvável	Provável	Muito provável	Provável	Muito provável	Muito provável	Muito provável	Improvável	Muito Útil	Útil	Provável	Muito provável	Provável	Concordo parcialmente	Concordo parcialmente	Discordo parcialmente	Concordo parcialmente	Discordo totalmente	Discordo totalmente	Discordo totalmente
114440445502	428177658	2023-10-18 17:42:51	2023-10-18 17:57:01	177.51.62.173					Aceito os termos acima e concordo em participar da pesquisa.	31-35	Masculino	Parda	Superior Completo	Sim, com vínculo empregatício	De 6 a 9 salários mínimos (R$7.920 a R$11.880)	Sim	Plano Piloto	Redes Particulares	Sim	Não			Depressão					Provável	Muito provável	Improvável	Muito provável	Muito provável	Provável	Muito provável	Provável	Provável	Provável	Muito Útil	Inútil	Improvável	Muito provável	Provável	Concordo totalmente	Concordo totalmente	Discordo parcialmente	Concordo totalmente	Discordo totalmente	Discordo totalmente	Discordo totalmente
114440433559	428177658	2023-10-18 17:33:46	2023-10-18 17:42:40	177.51.62.103					Aceito os termos acima e concordo em participar da pesquisa.	26-50	Feminino	Indígena	Fundamental incompleto	Sim, com vínculo empregatício	De 1 a 3 salários mínimos (R$1.320 a R$3.960)	Não	Samambaia	SUS	Não	Não						Nenhuma condição		Provável	Provável	Provável	Provável	Provável	Provável	Provável	Muito provável	Provável	Improvável	Útil	Útil	Provável	Provável	Provável	Discordo totalmente	Discordo totalmente	Concordo totalmente	Discordo parcialmente	Discordo totalmente	Concordo totalmente	Discordo totalmente
114440425529	428177658	2023-10-18 17:21:40	2023-10-18 17:33:18	177.51.62.103					Aceito os termos acima e concordo em participar da pesquisa.	36-40	Masculino	Preta	Ensino Médio completo	Sim, sem vínculo empregatício	De 1 a 3 salários mínimos (R$1.320 a R$3.960)	Não	Paranoá	SUS	Não	Não						Nenhuma condição		Provável	Provável	Provável	Provável	Provável	Provável	Improvável	Improvável	Improvável	Improvável	Útil	Útil	Provável	Muito provável	Muito provável	Discordo parcialmente	Concordo parcialmente	Concordo totalmente	Concordo parcialmente	Discordo totalmente	Discordo parcialmente	Concordo parcialmente
114440414414	428177658	2023-10-18 17:10:03	2023-10-18 17:21:20	177.51.62.103					Aceito os termos acima e concordo em participar da pesquisa.	26-30	Masculino	Branca	Superior Completo	Não	De 3 a 6 salários mínimos (R$3.960 a R$7.920)	Sim	Água Claras	Redes Particulares	Não	Não						Nenhuma condição		Muito improvável	Muito provável	Muito improvável	Provável	Provável	Improvável	Muito provável	Improvável	Muito provável	Provável	Útil	Muito Inútil	Improvável	Improvável	Improvável	Concordo parcialmente	Concordo totalmente	Concordo parcialmente	Concordo totalmente	Discordo parcialmente	Discordo parcialmente	Discordo parcialmente
114440403859	428177658	2023-10-18 17:00:06	2023-10-18 17:09:44	177.51.62.103					Aceito os termos acima e concordo em participar da pesquisa.	50+	Feminino	Parda	Superior Completo	Não	De 6 a 9 salários mínimos (R$7.920 a R$11.880)	Não	Plano Piloto	Redes Particulares	Sim	Não	Hipertensão/pressão alta							Provável	Provável	Provável	Provável	Muito provável	Provável	Provável	Muito provável	Muito provável	Provável	Muito Útil	Inútil	Provável	Muito provável	Muito provável	Concordo totalmente	Discordo parcialmente	Concordo totalmente	Concordo totalmente	Discordo totalmente	Discordo totalmente	Discordo totalmente
114440382350	428177658	2023-10-18 16:29:12	2023-10-18 16:46:46	177.51.62.103					Aceito os termos acima e concordo em participar da pesquisa.	18-25	Masculino	Parda	Ensino Médio completo	Não	De 1 a 3 salários mínimos (R$1.320 a R$3.960)	Não	Santa Maria	SUS e Redes Particulares	Sim	Sim						Nenhuma condição		Provável	Provável	Provável	Muito provável	Provável	Provável	Provável	Provável	Muito provável	Improvável	Muito Útil	Útil	Provável	Provável	Provável	Concordo parcialmente	Concordo totalmente	Concordo totalmente	Concordo totalmente	Discordo totalmente	Concordo totalmente	Concordo parcialmente
114440365329	428177658	2023-10-18 16:19:35	2023-10-18 16:28:59	177.51.62.103					Aceito os termos acima e concordo em participar da pesquisa.	50+	Feminino	Branca	Superior Completo	Não	De 3 a 6 salários mínimos (R$3.960 a R$7.920)	Não	Plano Piloto	Redes Particulares	Sim	Não			Depressão					Provável	Provável	Muito provável	Improvável	Provável	Improvável	Muito provável	Muito provável	Provável	Provável	Muito Útil	Útil	Provável	Provável	Improvável	Concordo totalmente	Concordo totalmente	Discordo parcialmente	Concordo parcialmente	Discordo parcialmente	Concordo parcialmente	Concordo parcialmente
114440355706	428177658	2023-10-18 16:05:56	2023-10-18 16:19:19	177.51.62.103					Aceito os termos acima e concordo em participar da pesquisa.	41-45	Feminino	Parda	Fundamental incompleto	Não	Até 1 salário mínimo (R$ 1.320)	Sim	Candangolândia	SUS	Não	Não					Câncer, exceto de pele			Provável	Provável	Provável	Improvável	Provável	Improvável	Provável	Provável	Improvável	Improvável	Útil	Útil	Provável	Muito provável	Muito provável	Discordo parcialmente	Concordo parcialmente	Discordo parcialmente	Concordo parcialmente	Discordo totalmente	Discordo totalmente	Discordo totalmente
114440341876	428177658	2023-10-18 15:53:48	2023-10-18 16:05:20	177.51.62.103					Aceito os termos acima e concordo em participar da pesquisa.	41-45	Masculino	Branca	Fundamental incompleto	Sim, sem vínculo empregatício	De 1 a 3 salários mínimos (R$1.320 a R$3.960)	Não	Guará	SUS e Redes Particulares	Não	Não						Nenhuma condição		Provável	Provável	Provável	Improvável	Muito provável	Improvável	Provável	Improvável	Muito provável	Muito provável	Muito Útil	Útil	Provável	Provável	Provável	Concordo totalmente	Concordo totalmente	Concordo totalmente	Concordo totalmente	Concordo totalmente	Concordo parcialmente	Concordo totalmente
114440329536	428177658	2023-10-18 15:42:51	2023-10-18 15:53:18	177.51.62.103					Aceito os termos acima e concordo em participar da pesquisa.	26-50	Feminino	Preta	Superior Completo	Sim, com vínculo empregatício	De 6 a 9 salários mínimos (R$7.920 a R$11.880)	Não	Park Way	Redes Particulares	Sim	Não							Transtorno de ansiedade	Provável	Muito provável	Muito provável	Provável	Provável	Provável	Muito provável	Provável	Muito provável	Muito improvável	Muito Útil	Útil	Provável	Improvável	Improvável	Concordo totalmente	Concordo parcialmente	Discordo parcialmente	Concordo totalmente	Discordo totalmente	Discordo totalmente	Discordo totalmente
114440314664	428177658	2023-10-18 15:26:16	2023-10-18 15:38:32	177.51.62.103					Aceito os termos acima e concordo em participar da pesquisa.	36-40	Feminino	Parda	Superior Completo	Sim, com vínculo empregatício	De 6 a 9 salários mínimos (R$7.920 a R$11.880)	Não	Plano Piloto	SUS e Redes Particulares	Não	Não							Espondilite anquilosante	Provável	Provável	Muito provável	Provável	Muito provável	Provável	Provável	Muito provável	Improvável	Improvável	Muito Útil	Útil	Improvável	Provável	Provável	Concordo totalmente	Concordo totalmente	Discordo totalmente	Concordo totalmente	Concordo parcialmente	Discordo totalmente	Discordo totalmente
114440297096	428177658	2023-10-18 15:10:58	2023-10-18 15:22:08	177.51.62.103					Aceito os termos acima e concordo em participar da pesquisa.	26-30	Feminino	Preta	Superior Completo	Não	De 1 a 3 salários mínimos (R$1.320 a R$3.960)	Não	Sobradinho	SUS e Redes Particulares	Não	Não						Nenhuma condição		Provável	Muito provável	Provável	Muito provável	Muito provável	Provável	Provável	Provável	Muito provável	Improvável	Muito Útil	Útil	Provável	Provável	Improvável	Concordo parcialmente	Discordo parcialmente	Discordo parcialmente	Concordo parcialmente	Discordo totalmente	Discordo totalmente	Discordo totalmente
114440274882	428177658	2023-10-18 14:48:25	2023-10-18 15:01:33	177.51.62.103					Aceito os termos acima e concordo em participar da pesquisa.	50+	Masculino	Branca	Superior Completo	Sim, com vínculo empregatício	De 6 a 9 salários mínimos (R$7.920 a R$11.880)	Não	Paranoá	SUS	Sim	Sim	Hipertensão/pressão alta		Depressão	Doenças cardiovasculares como infarto, derrame ou insuficiência cardíaca				Provável	Provável	Provável	Muito provável	Provável	Muito provável	Provável	Improvável	Improvável	Provável	Útil	Útil	Muito provável	Muito provável	Muito improvável	Não concordo nem discordo	Discordo parcialmente	Concordo parcialmente	Concordo totalmente	Não concordo nem discordo	Discordo totalmente	Discordo totalmente
114440260648	428177658	2023-10-18 14:37:39	2023-10-18 14:48:13	177.51.62.103					Aceito os termos acima e concordo em participar da pesquisa.	18-25	Feminino	Parda	Ensino Médio completo	Não	Até 1 salário mínimo (R$ 1.320)	Não	Jardim Botânico	SUS	Não	Não						Nenhuma condição		Provável	Provável	Provável	Improvável	Muito provável	Improvável	Muito provável	Muito provável	Improvável	Improvável	Útil	Muito Inútil	Provável	Provável	Improvável	Concordo parcialmente	Concordo totalmente	Concordo parcialmente	Concordo totalmente	Discordo parcialmente	Concordo parcialmente	Discordo totalmente
114440238422	428177658	2023-10-18 14:20:13	2023-10-18 14:30:01	177.51.62.109					Aceito os termos acima e concordo em participar da pesquisa.	36-40	Feminino	Parda	Ensino Médio completo	Sim, com vínculo empregatício	De 1 a 3 salários mínimos (R$1.320 a R$3.960)	Não	Gama	SUS	Não	Não						Nenhuma condição		Improvável	Muito provável	Muito improvável	Provável	Provável	Improvável	Muito provável	Provável	Muito provável	Muito improvável	Muito Útil	Inútil	Provável	Improvável	Improvável	Concordo totalmente	Concordo parcialmente	Discordo parcialmente	Concordo totalmente	Discordo parcialmente	Discordo parcialmente	Concordo parcialmente
114440230829	428177658	2023-10-18 14:10:41	2023-10-18 14:19:52	177.51.62.109					Aceito os termos acima e concordo em participar da pesquisa.	41-45	Feminino	Preta	Superior Completo	Sim, com vínculo empregatício	De 10 a 20 salários mínimos (R$13.200 a R$26.400)	Sim	Plano Piloto	SUS e Redes Particulares	Sim	Não	Hipertensão/pressão alta		Depressão					Provável	Improvável	Provável	Improvável	Provável	Provável	Provável	Provável	Provável	Provável	Muito Útil	Útil	Provável	Muito provável	Improvável	Discordo parcialmente	Concordo parcialmente	Concordo parcialmente	Concordo parcialmente	Discordo parcialmente	Discordo totalmente	Concordo parcialmente
114440220881	428177658	2023-10-18 13:59:55	2023-10-18 14:10:30	177.51.62.109					Aceito os termos acima e concordo em participar da pesquisa.	50+	Feminino	Parda	Ensino Médio completo	Sim, com vínculo empregatício	De 1 a 3 salários mínimos (R$1.320 a R$3.960)	Sim	Planaltina	SUS	Sim	Não		Diabetes						Provável	Improvável	Provável	Provável	Provável	Provável	Provável	Provável	Muito provável	Improvável	Muito Útil	Útil	Provável	Provável	Provável	Discordo parcialmente	Discordo parcialmente	Discordo totalmente	Discordo totalmente	Discordo totalmente	Concordo parcialmente	Discordo totalmente
114440208042	428177658	2023-10-18 12:50:10	2023-10-18 13:59:39	177.51.62.109					Aceito os termos acima e concordo em participar da pesquisa.	26-50	Masculino	Parda	Superior Completo	Sim, com vínculo empregatício	De 3 a 6 salários mínimos (R$3.960 a R$7.920)	Não	Samambaia	Redes Particulares	Não	Não						Nenhuma condição		Provável	Provável	Muito provável	Provável	Provável	Muito improvável	Improvável	Provável	Provável	Provável	Útil	Inútil	Provável	Muito provável	Improvável	Concordo totalmente	Concordo totalmente	Concordo totalmente	Concordo totalmente	Discordo parcialmente	Discordo parcialmente	Discordo totalmente
114440130667	428177658	2023-10-18 12:38:30	2023-10-18 12:49:57	177.51.62.109					Aceito os termos acima e concordo em participar da pesquisa.	26-30	Masculino	Branca	Superior Completo	Sim, com vínculo empregatício	De 3 a 6 salários mínimos (R$3.960 a R$7.920)	Não	Guará	SUS e Redes Particulares	Não	Não						Nenhuma condição		Improvável	Muito provável	Muito improvável	Provável	Muito provável	Improvável	Muito provável	Provável	Muito provável	Provável	Muito Útil	Inútil	Muito improvável	Provável	Provável	Concordo parcialmente	Concordo totalmente	Concordo parcialmente	Concordo totalmente	Discordo parcialmente	Discordo totalmente	Discordo parcialmente
114440116680	428177658	2023-10-18 12:26:00	2023-10-18 12:38:18	177.51.62.109					Aceito os termos acima e concordo em participar da pesquisa.	18-25	Feminino	Parda	Ensino Médio completo	Não	Até 1 salário mínimo (R$ 1.320)	Não	Sobradinho II	SUS	Sim	Sim			Depressão					Provável	Provável	Provável	Provável	Provável	Provável	Provável	Provável	Provável	Provável	Muito Útil	Útil	Provável	Provável	Provável	Concordo totalmente	Concordo totalmente	Concordo parcialmente	Concordo parcialmente	Não concordo nem discordo	Concordo parcialmente	Discordo totalmente
114440101527	428177658	2023-10-18 12:12:59	2023-10-18 12:25:34	177.51.62.109					Aceito os termos acima e concordo em participar da pesquisa.	50+	Feminino	Branca	Fundamental completo	Não	Até 1 salário mínimo (R$ 1.320)	Não	Recanto Das Emas	SUS	Não	Sim			Depressão					Provável	Provável	Provável	Provável	Provável	Provável	Improvável	Provável	Provável	Improvável	Muito Útil	Útil	Provável	Muito provável	Provável	Discordo totalmente	Discordo parcialmente	Discordo totalmente	Discordo totalmente	Discordo totalmente	Concordo parcialmente	Concordo totalmente
114440085990	428177658	2023-10-18 11:57:43	2023-10-18 12:12:38	177.51.62.109					Aceito os termos acima e concordo em participar da pesquisa.	36-40	Masculino	Parda	Ensino Médio completo	Sim, sem vínculo empregatício	De 1 a 3 salários mínimos (R$1.320 a R$3.960)	Não	Sobradinho	SUS e Redes Particulares	Não	Não						Nenhuma condição		Provável	Provável	Provável	Provável	Provável	Provável	Provável	Provável	Provável	Provável	Muito Útil	Útil	Provável	Improvável	Provável	Concordo totalmente	Concordo totalmente	Discordo parcialmente	Concordo totalmente	Discordo totalmente	Discordo totalmente	Discordo totalmente
114440067245	428177658	2023-10-18 11:41:39	2023-10-18 11:57:23	177.51.62.109					Aceito os termos acima e concordo em participar da pesquisa.	31-35	Masculino	Branca	Superior Completo	Sim, sem vínculo empregatício	De 3 a 6 salários mínimos (R$3.960 a R$7.920)	Sim	Taguatinga	Redes Particulares	Não	Não						Nenhuma condição		Improvável	Improvável	Provável	Improvável	Provável	Provável	Provável	Provável	Improvável	Improvável	Útil	Inútil	Improvável	Provável	Provável	Concordo totalmente	Concordo totalmente	Discordo parcialmente	Concordo totalmente	Discordo totalmente	Concordo parcialmente	Discordo totalmente
114440048204	428177658	2023-10-18 11:26:33	2023-10-18 11:41:26	177.51.62.109					Aceito os termos acima e concordo em participar da pesquisa.	18-25	Masculino	Preta	Fundamental incompleto	Não	Até 1 salário mínimo (R$ 1.320)	Não	Estrutural/Scia	SUS e Redes Particulares	Sim	Não						Nenhuma condição		Improvável	Provável	Provável	Provável	Improvável	Improvável	Improvável	Improvável	Provável	Improvável	Útil	Útil	Provável	Provável	Provável	Discordo parcialmente	Concordo parcialmente	Discordo parcialmente	Discordo parcialmente	Concordo totalmente	Não concordo nem discordo	Concordo parcialmente
114440018514	428177658	2023-10-18 11:01:23	2023-10-18 11:17:19	177.51.62.109					Aceito os termos acima e concordo em participar da pesquisa.	26-50	Feminino	Branca	Ensino Médio completo	Não	De 3 a 6 salários mínimos (R$3.960 a R$7.920)	Não	Planaltina	SUS e Redes Particulares	Não	Não						Nenhuma condição		Provável	Provável	Provável	Provável	Improvável	Improvável	Provável	Muito improvável	Muito provável	Improvável	Muito Útil	Inútil	Muito improvável	Provável	Improvável	Concordo totalmente	Discordo parcialmente	Discordo totalmente	Concordo totalmente	Discordo parcialmente	Discordo totalmente	Discordo parcialmente
114440013881	428177658	2023-10-18 11:05:16	2023-10-18 11:13:29	186.212.197.85					Aceito os termos acima e concordo em participar da pesquisa.	31-35	Feminino	Branca	Superior Completo	Sim, com vínculo empregatício	De 3 a 6 salários mínimos (R$3.960 a R$7.920)	Sim	Plano Piloto	Redes Particulares	Não	Não			Depressão					Provável	Muito provável	Muito provável	Muito provável	Muito provável	Provável	Muito provável	Provável	Muito provável	Muito improvável	Muito Útil	Inútil	Provável	Muito provável	Improvável	Concordo parcialmente	Concordo parcialmente	Discordo parcialmente	Concordo totalmente	Não concordo nem discordo	Discordo totalmente	Discordo totalmente
114439998509	428177658	2023-10-18 10:45:18	2023-10-18 11:01:02	177.51.62.109					Aceito os termos acima e concordo em participar da pesquisa.	41-45	Feminino	Parda	Superior Completo	Sim, sem vínculo empregatício	De 3 a 6 salários mínimos (R$3.960 a R$7.920)	Não	Paranoá	SUS e Redes Particulares	Sim	Não							Tireóide	Muito provável	Provável	Muito provável	Muito provável	Muito provável	Provável	Muito provável	Improvável	Provável	Improvável	Útil	Útil	Provável	Provável	Provável	Concordo totalmente	Concordo totalmente	Discordo totalmente	Concordo totalmente	Discordo totalmente	Discordo totalmente	Concordo parcialmente
114439980201	428177658	2023-10-18 10:29:34	2023-10-18 10:44:29	177.51.62.109					Aceito os termos acima e concordo em participar da pesquisa.	50+	Masculino	Branca	Ensino Médio Incompleto	Sim, com vínculo empregatício	De 1 a 3 salários mínimos (R$1.320 a R$3.960)	Não	Planaltina	SUS	Não	Não						Nenhuma condição		Provável	Provável	Provável	Improvável	Provável	Improvável	Provável	Provável	Provável	Provável	Útil	Útil	Provável	Provável	Improvável	Concordo parcialmente	Discordo parcialmente	Concordo parcialmente	Concordo parcialmente	Discordo parcialmente	Concordo parcialmente	Discordo parcialmente
114439963094	428177658	2023-10-18 10:22:50	2023-10-18 10:29:13	177.51.62.109					Aceito os termos acima e concordo em participar da pesquisa.	18-25	Masculino	Preta	Superior Completo	Sim, com vínculo empregatício	De 1 a 3 salários mínimos (R$1.320 a R$3.960)	Não	Plano Piloto	SUS	Não	Não			Depressão					Muito improvável	Muito provável	Muito provável	Muito provável	Muito provável	Muito provável	Muito provável	Provável	Muito provável	Improvável	Muito Útil	Muito Útil	Provável	Muito provável	Muito improvável	Concordo totalmente	Concordo totalmente	Discordo totalmente	Concordo totalmente	Discordo totalmente	Discordo totalmente	Discordo totalmente
114439955703	428177658	2023-10-18 10:06:11	2023-10-18 10:22:34	177.51.62.109					Aceito os termos acima e concordo em participar da pesquisa.	26-50	Masculino	Parda	Ensino Médio Incompleto	Sim, com vínculo empregatício	De 1 a 3 salários mínimos (R$1.320 a R$3.960)	Não	Planaltina	SUS	Sim	Não							espondilite	Muito provável	Provável	Provável	Provável	Muito provável	Provável	Muito provável	Provável	Muito provável	Provável	Muito Útil	Muito Útil	Improvável	Muito provável	Provável	Não concordo nem discordo	Discordo parcialmente	Concordo totalmente	Concordo totalmente	Discordo parcialmente	Discordo parcialmente	Discordo totalmente
114439937435	428177658	2023-10-18 09:52:20	2023-10-18 10:05:58	177.51.62.109					Aceito os termos acima e concordo em participar da pesquisa.	50+	Feminino	Branca	Ensino Médio completo	Não	De 1 a 3 salários mínimos (R$1.320 a R$3.960)	Sim	Paranoá	SUS	Sim	Sim	Hipertensão/pressão alta						Insuficiência renal e deficiência auditiva de 1 ouvido	Improvável	Provável	Provável	Provável	Provável	Improvável	Provável	Improvável	Provável	Improvável	Muito Útil	Inútil	Provável	Muito provável	Provável	Discordo parcialmente	Concordo totalmente	Concordo totalmente	Concordo totalmente	Concordo totalmente	Concordo parcialmente	Discordo parcialmente
114439923144	428177658	2023-10-18 09:39:57	2023-10-18 09:52:03	177.51.62.109					Aceito os termos acima e concordo em participar da pesquisa.	50+	Feminino	Parda	Fundamental completo	Não	Até 1 salário mínimo (R$ 1.320)	Sim	Planaltina	SUS	Sim	Não			Depressão					Improvável	Muito provável	Muito provável	Muito provável	Muito provável	Muito provável	Provável	Muito provável	Muito provável	Provável	Muito Útil	Útil	Provável	Muito provável	Provável	Discordo totalmente	Discordo totalmente	Discordo totalmente	Discordo parcialmente	Discordo totalmente	Discordo totalmente	Discordo totalmente
114439911255	428177658	2023-10-18 09:27:43	2023-10-18 09:39:31	177.51.62.109					Aceito os termos acima e concordo em participar da pesquisa.	26-30	Masculino	Parda	Superior Completo	Sim, sem vínculo empregatício	De 1 a 3 salários mínimos (R$1.320 a R$3.960)	Não	Paranoá	SUS e Redes Particulares	Não	Não	Hipertensão/pressão alta							Muito improvável	Provável	Provável	Muito improvável	Muito improvável	Muito improvável	Muito improvável	Provável	Improvável	Improvável	Muito Útil	Útil	Provável	Muito improvável	Improvável	Não concordo nem discordo	Discordo parcialmente	Discordo totalmente	Discordo totalmente	Discordo totalmente	Discordo parcialmente	Discordo totalmente
114439900023	428177658	2023-10-18 09:18:57	2023-10-18 09:27:31	177.51.62.109					Aceito os termos acima e concordo em participar da pesquisa.	26-50	Masculino	Parda	Superior Completo	Sim, sem vínculo empregatício	De 6 a 9 salários mínimos (R$7.920 a R$11.880)	Não	Guará	Redes Particulares	Sim	Não		Diabetes						Provável	Muito provável	Improvável	Provável	Provável	Improvável	Provável	Muito provável	Provável	Muito improvável	Muito Útil	Muito Útil	Muito provável	Muito provável	Improvável	Concordo totalmente	Discordo totalmente	Discordo totalmente	Discordo totalmente	Concordo parcialmente	Concordo parcialmente	Discordo parcialmente
114439314009	428177658	2023-10-17 17:27:15	2023-10-17 17:51:41	189.40.77.205					Aceito os termos acima e concordo em participar da pesquisa.	26-30	Feminino	Branca	Superior Incompleto	Não	Até 1 salário mínimo (R$ 1.320)	Não	Taguatinga	SUS e Redes Particulares	Não	Não						Nenhuma condição		Provável	Muito provável	Provável	Provável	Provável	Provável	Muito provável	Muito provável	Provável	Improvável	Muito Útil	Inútil	Provável	Improvável	Muito improvável	Concordo totalmente	Concordo totalmente	Concordo totalmente	Concordo totalmente	Discordo totalmente	Discordo totalmente	Discordo totalmente
114439293838	428177658	2023-10-17 17:19:41	2023-10-17 17:27:03	177.51.61.163					Aceito os termos acima e concordo em participar da pesquisa.	26-50	Masculino	Preta	Superior Completo	Sim, com vínculo empregatício	De 3 a 6 salários mínimos (R$3.960 a R$7.920)	Não	Paranoá	SUS e Redes Particulares	Sim	Não	Hipertensão/pressão alta							Provável	Provável	Muito improvável	Provável	Provável	Provável	Muito provável	Improvável	Muito provável	Provável	Útil	Útil	Provável	Muito provável	Provável	Discordo parcialmente	Concordo parcialmente	Discordo parcialmente	Concordo parcialmente	Concordo parcialmente	Discordo totalmente	Concordo parcialmente
114439287213	428177658	2023-10-17 17:09:24	2023-10-17 17:19:12	177.51.62.153					Aceito os termos acima e concordo em participar da pesquisa.	31-35	Masculino	Parda	Ensino Médio completo	Sim, sem vínculo empregatício	De 1 a 3 salários mínimos (R$1.320 a R$3.960)	Sim	Ceilândia	Redes Particulares	Sim	Não						Nenhuma condição		Improvável	Improvável	Muito improvável	Provável	Provável	Muito improvável	Provável	Improvável	Improvável	Improvável	Útil	Inútil	Muito improvável	Provável	Muito improvável	Discordo parcialmente	Concordo parcialmente	Discordo parcialmente	Concordo parcialmente	Discordo parcialmente	Concordo parcialmente	Concordo parcialmente
114439278611	428177658	2023-10-17 16:53:50	2023-10-17 17:09:10	177.51.62.153					Aceito os termos acima e concordo em participar da pesquisa.	36-40	Feminino	Branca	Ensino Médio completo	Sim, sem vínculo empregatício	De 1 a 3 salários mínimos (R$1.320 a R$3.960)	Não	Santa Maria	SUS	Não	Não						Nenhuma condição		Provável	Muito provável	Muito provável	Muito provável	Muito provável	Muito provável	Muito provável	Muito provável	Provável	Muito improvável	Útil	Muito Útil	Provável	Muito provável	Provável	Concordo totalmente	Concordo parcialmente	Concordo totalmente	Concordo totalmente	Discordo totalmente	Discordo totalmente	Discordo totalmente
114439263752	428177658	2023-10-17 16:45:03	2023-10-17 16:53:36	177.51.61.163					Aceito os termos acima e concordo em participar da pesquisa.	18-25	Feminino	Parda	Superior Incompleto	Não	De 1 a 3 salários mínimos (R$1.320 a R$3.960)	Não	São Sebastião	SUS	Não	Não						Nenhuma condição		Provável	Provável	Provável	Provável	Muito provável	Muito provável	Provável	Provável	Provável	Improvável	Útil	Útil	Provável	Provável	Improvável	Concordo parcialmente	Concordo parcialmente	Concordo parcialmente	Não concordo nem discordo	Não concordo nem discordo	Discordo totalmente	Discordo totalmente
114439255174	428177658	2023-10-17 16:33:18	2023-10-17 16:44:52	177.51.61.163					Aceito os termos acima e concordo em participar da pesquisa.	18-25	Masculino	Parda	Ensino Médio Incompleto	Sim, sem vínculo empregatício	Até 1 salário mínimo (R$ 1.320)	Não	Riacho Fundo 2	SUS	Não	Não						Nenhuma condição		Provável	Provável	Muito provável	Provável	Muito provável	Muito improvável	Muito provável	Improvável	Provável	Muito provável	Útil	Muito Útil	Provável	Muito provável	Muito provável	Concordo totalmente	Concordo parcialmente	Concordo parcialmente	Não concordo nem discordo	Concordo parcialmente	Discordo parcialmente	Discordo totalmente
114439240754	428177658	2023-10-17 16:21:16	2023-10-17 16:29:33	177.51.62.153					Aceito os termos acima e concordo em participar da pesquisa.	31-35	Feminino	Branca	Superior Completo	Sim, sem vínculo empregatício	De 1 a 3 salários mínimos (R$1.320 a R$3.960)	Sim	Jardim Botânico	SUS e Redes Particulares	Não	Não						Nenhuma condição		Improvável	Provável	Provável	Provável	Provável	Provável	Provável	Provável	Improvável	Improvável	Muito Útil	Inútil	Provável	Improvável	Improvável	Não concordo nem discordo	Concordo parcialmente	Concordo totalmente	Concordo totalmente	Discordo parcialmente	Discordo totalmente	Discordo totalmente
114439226654	428177658	2023-10-17 16:14:19	2023-10-17 16:15:24	177.50.78.180					Aceito os termos acima e concordo em participar da pesquisa.	36-40	Masculino	Branca	Superior Completo	Sim, com vínculo empregatício	De 10 a 20 salários mínimos (R$13.200 a R$26.400)	Não	Sobradinho II	SUS e Redes Particulares	Não	Não						Nenhuma condição		Improvável	Provável	Provável	Provável	Provável	Provável	Improvável	Provável	Improvável	Provável	Muito Útil	Muito Útil	Provável	Muito improvável	Muito improvável	Discordo totalmente	Discordo parcialmente	Discordo totalmente	Discordo parcialmente	Não concordo nem discordo	Discordo parcialmente	Discordo parcialmente
114439222524	428177658	2023-10-17 15:56:51	2023-10-17 16:11:22	177.51.62.153					Aceito os termos acima e concordo em participar da pesquisa.	26-30	Feminino	Preta	Superior Completo	Sim, com vínculo empregatício	De 1 a 3 salários mínimos (R$1.320 a R$3.960)	Não	Planaltina	SUS	Sim	Não							Bipolaridade	Muito improvável	Muito improvável	Improvável	Provável	Provável	Improvável	Provável	Improvável	Improvável	Improvável	Muito Útil	Inútil	Improvável	Improvável	Provável	Concordo parcialmente	Concordo totalmente	Discordo parcialmente	Concordo parcialmente	Discordo parcialmente	Discordo totalmente	Concordo parcialmente
114439216907	428177658	2023-10-17 15:45:29	2023-10-17 16:06:19	177.174.211.106					Aceito os termos acima e concordo em participar da pesquisa.	26-30	Feminino	Parda	Superior Incompleto	Sim, com vínculo empregatício	Até 1 salário mínimo (R$ 1.320)	Não	Itapoã	SUS	Sim	Não			Depressão					Provável	Muito provável	Provável	Provável	Improvável	Provável	Provável	Improvável	Improvável	Improvável	Útil	Útil	Provável	Muito provável	Improvável	Não concordo nem discordo	Discordo parcialmente	Concordo parcialmente	Discordo parcialmente	Discordo totalmente	Discordo totalmente	Discordo totalmente
114439205854	428177658	2023-10-17 15:39:44	2023-10-17 15:56:33	177.51.61.163					Aceito os termos acima e concordo em participar da pesquisa.	36-40	Feminino	Parda	Ensino Médio Incompleto	Sim, com vínculo empregatício	De 1 a 3 salários mínimos (R$1.320 a R$3.960)	Sim	Planaltina	SUS	Não	Não						Nenhuma condição		Muito improvável	Provável	Muito provável	Muito provável	Provável	Provável	Provável	Provável	Provável	Provável	Muito Inútil	Útil	Muito provável	Provável	Provável	Concordo totalmente	Concordo totalmente	Concordo totalmente	Concordo totalmente	Concordo totalmente	Concordo totalmente	Não concordo nem discordo
114439205109	428177658	2023-10-17 15:41:50	2023-10-17 15:55:33	191.56.32.214					Aceito os termos acima e concordo em participar da pesquisa.	18-25	Feminino	Parda	Superior Incompleto	Sim, sem vínculo empregatício	Até 1 salário mínimo (R$ 1.320)	Sim	Plano Piloto	SUS	Não	Não						Nenhuma condição		Improvável	Muito provável	Provável	Muito provável	Provável	Provável	Provável	Muito improvável	Provável	Improvável	Muito Útil	Inútil	Provável	Muito provável	Muito improvável	Concordo parcialmente	Concordo totalmente	Concordo parcialmente	Discordo totalmente	Discordo parcialmente	Discordo totalmente	Discordo totalmente
114439189942	428177658	2023-10-17 15:25:11	2023-10-17 15:39:31	177.51.62.153					Aceito os termos acima e concordo em participar da pesquisa.	18-25	Feminino	Preta	Ensino Médio completo	Sim, com vínculo empregatício	De 1 a 3 salários mínimos (R$1.320 a R$3.960)	Sim	Santa Maria	SUS	Não	Não						Nenhuma condição		Provável	Muito provável	Provável	Provável	Provável	Muito provável	Provável	Improvável	Muito provável	Muito improvável	Útil	Útil	Provável	Provável	Provável	Discordo parcialmente	Concordo parcialmente	Não concordo nem discordo	Concordo parcialmente	Concordo parcialmente	Não concordo nem discordo	Discordo totalmente
114439186356	428177658	2023-10-17 15:15:00	2023-10-17 15:35:30	177.50.70.10					Aceito os termos acima e concordo em participar da pesquisa.	31-35	Masculino	Preta	Superior Incompleto	Sim, com vínculo empregatício	De 1 a 3 salários mínimos (R$1.320 a R$3.960)	Não	Paranoá	Redes Particulares	Sim	Não		Diabetes						Muito improvável	Provável	Improvável	Muito provável	Muito improvável	Improvável	Muito provável	Muito provável	Provável	Improvável	Útil	Útil	Muito improvável	Muito provável	Muito improvável	Discordo parcialmente	Discordo parcialmente	Concordo parcialmente	Concordo parcialmente	Não concordo nem discordo	Discordo totalmente	Discordo totalmente
114439176423	428177658	2023-10-17 15:01:40	2023-10-17 15:24:51	177.51.62.153					Aceito os termos acima e concordo em participar da pesquisa.	18-25	Feminino	Parda	Superior Incompleto	Não	Até 1 salário mínimo (R$ 1.320)	Não	Lago Norte	Redes Particulares	Não	Não						Nenhuma condição		Provável	Provável	Provável	Provável	Provável	Provável	Provável	Provável	Improvável	Provável	Útil	Útil	Provável	Improvável	Provável	Não concordo nem discordo	Não concordo nem discordo	Não concordo nem discordo	Concordo parcialmente	Não concordo nem discordo	Discordo totalmente	Discordo totalmente
114439173061	428177658	2023-10-17 15:14:56	2023-10-17 15:21:16	179.151.163.29					Aceito os termos acima e concordo em participar da pesquisa.	26-30	Masculino	Parda	Superior Completo	Sim, com vínculo empregatício	De 3 a 6 salários mínimos (R$3.960 a R$7.920)	Sim	Sobradinho	Redes Particulares	Sim	Não							Tdah	Provável	Provável	Provável	Muito provável	Muito provável	Muito provável	Provável	Muito provável	Improvável	Muito provável	Útil	Muito Útil	Provável	Muito provável	Improvável	Concordo parcialmente	Concordo parcialmente	Não concordo nem discordo	Concordo totalmente	Discordo parcialmente	Concordo parcialmente	Discordo totalmente
114439151867	428177658	2023-10-17 14:37:08	2023-10-17 15:01:28	177.51.62.153					Aceito os termos acima e concordo em participar da pesquisa.	18-25	Feminino	Preta	Ensino Médio completo	Sim, com vínculo empregatício	Até 1 salário mínimo (R$ 1.320)	Não	Gama	SUS e Redes Particulares	Não	Não			Depressão				Ansiedade	Provável	Muito provável	Provável	Muito provável	Muito provável	Provável	Provável	Muito provável	Muito provável	Provável	Útil	Inútil	Provável	Muito provável	Improvável	Concordo totalmente	Concordo parcialmente	Concordo parcialmente	Concordo parcialmente	Discordo totalmente	Discordo totalmente	Discordo totalmente
114439146455	428177658	2023-10-17 14:44:45	2023-10-17 14:56:03	191.56.51.133					Aceito os termos acima e concordo em participar da pesquisa.	18-25	Feminino	Parda	Superior Incompleto	Sim, sem vínculo empregatício	Até 1 salário mínimo (R$ 1.320)	Não	Ceilândia	SUS	Sim	Não			Depressão					Muito provável	Muito provável	Muito provável	Muito provável	Muito provável	Provável	Muito provável	Muito provável	Muito provável	Improvável	Muito Útil	Útil	Provável	Muito provável	Muito improvável	Concordo totalmente	Concordo totalmente	Concordo totalmente	Concordo totalmente	Discordo totalmente	Discordo totalmente	Discordo totalmente
114439132298	428177658	2023-10-17 14:31:23	2023-10-17 14:41:29	177.51.61.38					Aceito os termos acima e concordo em participar da pesquisa.	26-30	Masculino	Parda	Superior Incompleto	Sim, com vínculo empregatício	De 1 a 3 salários mínimos (R$1.320 a R$3.960)	Não	Ceilândia	SUS	Sim	Não	Hipertensão/pressão alta		Depressão					Improvável	Provável	Improvável	Provável	Provável	Improvável	Provável	Provável	Improvável	Improvável	Muito Útil	Útil	Muito improvável	Muito improvável	Muito improvável	Concordo parcialmente	Concordo parcialmente	Concordo totalmente	Concordo totalmente	Concordo totalmente	Concordo totalmente	Concordo totalmente
114439127755	428177658	2023-10-17 14:25:31	2023-10-17 14:36:46	177.51.62.153					Aceito os termos acima e concordo em participar da pesquisa.	18-25	Feminino	Parda	Superior Incompleto	Não	Até 1 salário mínimo (R$ 1.320)	Não	Paranoá	SUS	Não	Não						Nenhuma condição		Muito provável	Muito provável	Provável	Provável	Provável	Provável	Muito provável	Muito provável	Provável	Provável	Útil	Útil	Provável	Provável	Provável	Não concordo nem discordo	Discordo parcialmente	Não concordo nem discordo	Concordo parcialmente	Discordo parcialmente	Discordo totalmente	Discordo totalmente
114439124177	428177658	2023-10-17 14:24:47	2023-10-17 14:33:18	164.41.4.26					Aceito os termos acima e concordo em participar da pesquisa.	18-25	Masculino	Branca	Superior Incompleto	Sim, sem vínculo empregatício	Até 1 salário mínimo (R$ 1.320)	Não	Ceilândia	SUS	Não	Não						Nenhuma condição		Provável	Provável	Muito provável	Muito provável	Muito provável	Muito provável	Provável	Provável	Improvável	Improvável	Muito Útil	Inútil	Provável	Provável	Muito improvável	Discordo totalmente	Não concordo nem discordo	Discordo totalmente	Discordo totalmente	Discordo totalmente	Discordo totalmente	Discordo totalmente
114439116305	428177658	2023-10-17 14:16:23	2023-10-17 14:25:54	177.174.218.101					Aceito os termos acima e concordo em participar da pesquisa.	26-30	Feminino	Preta	Superior Incompleto	Sim, sem vínculo empregatício	Até 1 salário mínimo (R$ 1.320)	Não	Taguatinga	SUS e Redes Particulares	Sim	Não			Depressão					Provável	Muito provável	Muito provável	Muito improvável	Muito provável	Provável	Provável	Muito provável	Muito provável	Improvável	Muito Útil	Útil	Provável	Muito provável	Muito improvável	Concordo totalmente	Concordo parcialmente	Concordo parcialmente	Concordo totalmente	Discordo totalmente	Discordo totalmente	Discordo parcialmente
114439115976	428177658	2023-10-17 14:13:34	2023-10-17 14:25:18	177.51.62.153					Aceito os termos acima e concordo em participar da pesquisa.	31-35	Feminino	Parda	Ensino Médio Incompleto	Não	De 1 a 3 salários mínimos (R$1.320 a R$3.960)	Não	Paranoá	SUS	Não	Não						Nenhuma condição		Provável	Muito provável	Provável	Provável	Provável	Provável	Muito provável	Improvável	Muito provável	Improvável	Útil	Útil	Provável	Provável	Provável	Discordo totalmente	Discordo parcialmente	Concordo totalmente	Concordo parcialmente	Discordo parcialmente	Discordo totalmente	Discordo parcialmente
114439103690	428177658	2023-10-17 14:00:05	2023-10-17 14:13:16	177.51.62.153					Aceito os termos acima e concordo em participar da pesquisa.	18-25	Feminino	Parda	Superior Incompleto	Não	Até 1 salário mínimo (R$ 1.320)	Não	Sobradinho	SUS	Não	Não						Nenhuma condição		Provável	Provável	Muito provável	Muito provável	Muito provável	Muito provável	Muito provável	Muito provável	Muito provável	Muito improvável	Muito Útil	Inútil	Provável	Muito provável	Provável	Concordo totalmente	Concordo totalmente	Concordo parcialmente	Concordo totalmente	Discordo totalmente	Discordo totalmente	Discordo totalmente
114439090869	428177658	2023-10-17 12:23:02	2023-10-17 13:59:55	177.51.62.153					Aceito os termos acima e concordo em participar da pesquisa.	31-35	Feminino	Parda	Ensino Médio completo	Não	Até 1 salário mínimo (R$ 1.320)	Não	Estrutural/Scia	SUS e Redes Particulares	Não	Não		Diabetes						Improvável	Muito provável	Muito provável	Provável	Provável	Provável	Provável	Muito provável	Provável	Provável	Muito Útil	Útil	Improvável	Muito provável	Improvável	Concordo totalmente	Discordo parcialmente	Discordo parcialmente	Concordo totalmente	Concordo totalmente	Discordo parcialmente	Discordo parcialmente
114439009096	428177658	2023-10-17 10:01:05	2023-10-17 12:41:19	164.41.4.26					Aceito os termos acima e concordo em participar da pesquisa.	31-35	Masculino	Branca	Superior Completo	Sim, sem vínculo empregatício	De 3 a 6 salários mínimos (R$3.960 a R$7.920)	Não	Plano Piloto	SUS	Não	Não						Nenhuma condição		Muito improvável	Improvável	Muito improvável	Provável	Provável	Improvável	Muito improvável	Muito improvável	Muito provável	Improvável	Útil	Inútil	Provável	Muito provável	Improvável	Discordo parcialmente	Discordo parcialmente	Concordo totalmente	Não concordo nem discordo	Não concordo nem discordo	Discordo parcialmente	Não concordo nem discordo
114439000136	428177658	2023-10-17 12:03:02	2023-10-17 12:33:12	177.174.219.31					Aceito os termos acima e concordo em participar da pesquisa.	18-25	Feminino	Parda	Superior Incompleto	Não	Até 1 salário mínimo (R$ 1.320)	Não	Plano Piloto	SUS e Redes Particulares	Não	Não						Nenhuma condição		Provável	Provável	Provável	Muito provável	Muito provável	Improvável	Improvável	Provável	Muito provável	Improvável	Inútil	Útil	Provável	Provável	Improvável	Concordo totalmente	Concordo parcialmente	Concordo totalmente	Concordo totalmente	Concordo parcialmente	Discordo parcialmente	Discordo parcialmente
114438987827	428177658	2023-10-17 12:15:52	2023-10-17 12:22:27	177.50.70.201					Aceito os termos acima e concordo em participar da pesquisa.	18-25	Feminino	Amarela	Superior Incompleto	Sim, com vínculo empregatício	Até 1 salário mínimo (R$ 1.320)	Não	Taguatinga	SUS e Redes Particulares	Não	Não						Nenhuma condição		Muito provável	Muito provável	Muito provável	Improvável	Provável	Provável	Muito provável	Muito provável	Muito provável	Provável	Muito Útil	Muito Útil	Provável	Provável	Provável	Concordo totalmente	Concordo totalmente	Concordo totalmente	Concordo totalmente	Discordo parcialmente	Discordo totalmente	Discordo parcialmente
114438979596	428177658	2023-10-17 12:01:12	2023-10-17 12:15:15	177.50.70.201					Aceito os termos acima e concordo em participar da pesquisa.	18-25	Masculino	Preta	Superior Completo	Não	Até 1 salário mínimo (R$ 1.320)	Não	Plano Piloto	SUS	Não	Não						Nenhuma condição		Improvável	Muito improvável	Provável	Muito improvável	Muito provável	Provável	Provável	Muito improvável	Improvável	Provável	Muito Útil	Útil	Provável	Provável	Provável	Concordo totalmente	Discordo parcialmente	Concordo totalmente	Concordo totalmente	Discordo totalmente	Concordo parcialmente	Discordo totalmente
114438967709	428177658	2023-10-17 11:45:35	2023-10-17 12:04:43	177.174.217.161					Aceito os termos acima e concordo em participar da pesquisa.	18-25	Masculino	Preta	Superior Incompleto	Sim, sem vínculo empregatício	Até 1 salário mínimo (R$ 1.320)	Não	Gama	Redes Particulares	Não	Não						Nenhuma condição		Improvável	Muito provável	Provável	Muito provável	Muito provável	Muito provável	Muito provável	Muito provável	Muito provável	Improvável	Muito Útil	Útil	Muito provável	Muito provável	Muito improvável	Concordo totalmente	Discordo parcialmente	Discordo totalmente	Concordo totalmente	Discordo totalmente	Discordo totalmente	Discordo totalmente
114438963053	428177658	2023-10-17 11:45:42	2023-10-17 12:01:00	177.50.72.95					Aceito os termos acima e concordo em participar da pesquisa.	18-25	Feminino	Parda	Superior Incompleto	Não	Até 1 salário mínimo (R$ 1.320)	Não	Itapoã	SUS e Redes Particulares	Não	Não						Nenhuma condição		Provável	Provável	Provável	Provável	Provável	Muito provável	Muito improvável	Provável	Provável	Provável	Útil	Útil	Provável	Improvável	Improvável	Concordo totalmente	Concordo parcialmente	Concordo totalmente	Concordo totalmente	Discordo totalmente	Discordo parcialmente	Discordo parcialmente
114438960998	428177658	2023-10-17 11:44:47	2023-10-17 11:59:04	177.51.62.23					Aceito os termos acima e concordo em participar da pesquisa.	18-25	Masculino	Branca	Ensino Médio completo	Não	Até 1 salário mínimo (R$ 1.320)	Não	Vicente Pires	Redes Particulares	Não	Não						Nenhuma condição		Provável	Provável	Provável	Muito provável	Provável	Provável	Provável	Muito provável	Muito improvável	Muito provável	Útil	Muito Inútil	Provável	Provável	Improvável	Concordo totalmente	Não concordo nem discordo	Concordo totalmente	Concordo parcialmente	Concordo parcialmente	Discordo parcialmente	Não concordo nem discordo
114438957927	428177658	2023-10-17 11:50:07	2023-10-17 11:56:30	177.174.214.145					Aceito os termos acima e concordo em participar da pesquisa.	18-25	Feminino	Parda	Ensino Médio completo	Sim, com vínculo empregatício	Até 1 salário mínimo (R$ 1.320)	Não	Paranoá	SUS e Redes Particulares	Não	Não			Depressão				Hipoglicemia	Provável	Muito provável	Provável	Muito provável	Muito provável	Provável	Muito provável	Muito provável	Muito provável	Provável	Útil	Útil	Muito provável	Muito provável	Muito improvável	Concordo parcialmente	Concordo parcialmente	Concordo parcialmente	Concordo totalmente	Concordo parcialmente	Discordo totalmente	Discordo totalmente
114438954450	428177658	2023-10-17 11:44:13	2023-10-17 11:53:43	177.51.63.62					Aceito os termos acima e concordo em participar da pesquisa.	18-25	Feminino	Preta	Superior Incompleto	Sim, com vínculo empregatício	Até 1 salário mínimo (R$ 1.320)	Não	Ceilândia	SUS	Não	Não						Nenhuma condição		Muito provável	Muito provável	Muito provável	Provável	Provável	Muito provável	Muito provável	Muito provável	Muito provável	Improvável	Muito Útil	Muito Útil	Muito provável	Muito provável	Provável	Concordo totalmente	Concordo totalmente	Concordo totalmente	Concordo totalmente	Discordo totalmente	Discordo totalmente	Discordo totalmente
114438944540	428177658	2023-10-17 11:34:33	2023-10-17 11:45:10	177.50.70.201					Aceito os termos acima e concordo em participar da pesquisa.	18-25	Feminino	Branca	Ensino Médio completo	Sim, com vínculo empregatício	Até 1 salário mínimo (R$ 1.320)	Não	Santa Maria	SUS	Sim	Não			Depressão					Muito provável	Muito provável	Provável	Muito provável	Muito provável	Provável	Muito provável	Muito provável	Muito provável	Provável	Muito Útil	Útil	Muito provável	Muito provável	Provável	Concordo totalmente	Concordo totalmente	Concordo parcialmente	Concordo totalmente	Discordo totalmente	Discordo totalmente	Concordo parcialmente
114438937704	428177658	2023-10-17 10:24:42	2023-10-17 11:38:35	164.41.4.26					Aceito os termos acima e concordo em participar da pesquisa.	18-25	Feminino	Preta	Superior Incompleto	Não	De 6 a 9 salários mínimos (R$7.920 a R$11.880)	Não	Gama	SUS e Redes Particulares	Não	Não						Nenhuma condição		Muito provável	Provável	Provável	Provável	Muito provável	Provável	Provável	Muito provável	Improvável	Improvável	Muito Útil	Útil	Muito provável	Provável	Improvável	Concordo parcialmente	Discordo parcialmente	Concordo totalmente	Concordo totalmente	Discordo parcialmente	Discordo parcialmente	Discordo totalmente
114438935739	428177658	2023-10-17 11:17:44	2023-10-17 11:36:41	164.163.0.126					Aceito os termos acima e concordo em participar da pesquisa.	18-25	Masculino	Branca	Superior Completo	Sim, sem vínculo empregatício	De 1 a 3 salários mínimos (R$1.320 a R$3.960)	Sim	Samambaia	SUS	Não	Não			Depressão					Improvável	Muito improvável	Provável	Provável	Provável	Improvável	Provável	Muito improvável	Improvável	Provável	Muito Útil	Útil	Provável	Muito provável	Improvável	Concordo parcialmente	Concordo parcialmente	Discordo totalmente	Concordo parcialmente	Discordo parcialmente	Discordo totalmente	Discordo totalmente
114438935509	428177658	2023-10-17 11:17:49	2023-10-17 11:36:28	189.40.77.80					Aceito os termos acima e concordo em participar da pesquisa.	26-30	Feminino	Branca	Superior Completo	Sim, sem vínculo empregatício	De 1 a 3 salários mínimos (R$1.320 a R$3.960)	Não	Plano Piloto	SUS e Redes Particulares	Não	Não						Nenhuma condição		Provável	Muito improvável	Muito improvável	Muito improvável	Muito improvável	Improvável	Muito improvável	Improvável	Muito improvável	Provável	Inútil	Muito Inútil	Provável	Muito provável	Muito improvável	Concordo totalmente	Concordo totalmente	Discordo parcialmente	Concordo totalmente	Não concordo nem discordo	Discordo totalmente	Discordo totalmente
114438932755	428177658	2023-10-17 11:16:22	2023-10-17 11:34:17	177.50.73.5					Aceito os termos acima e concordo em participar da pesquisa.	41-45	Masculino	Preta	Ensino Médio completo	Sim, com vínculo empregatício	De 1 a 3 salários mínimos (R$1.320 a R$3.960)	Não	Gama	SUS	Não	Não						Nenhuma condição		Improvável	Muito provável	Muito provável	Muito provável	Provável	Provável	Improvável	Muito provável	Provável	Muito improvável	Muito Útil	Inútil	Provável	Muito provável	Muito provável	Concordo totalmente	Discordo parcialmente	Concordo parcialmente	Concordo totalmente	Discordo parcialmente	Discordo parcialmente	Discordo totalmente
114438915990	428177658	2023-10-17 10:58:58	2023-10-17 11:16:13	177.50.70.176					Aceito os termos acima e concordo em participar da pesquisa.	26-30	Masculino	Parda	Superior Completo	Não	Até 1 salário mínimo (R$ 1.320)	Não	Lago Sul	SUS e Redes Particulares	Sim	Não						Nenhuma condição		Provável	Muito provável	Muito provável	Muito provável	Muito provável	Provável	Improvável	Improvável	Muito provável	Provável	Muito Útil	Útil	Provável	Provável	Improvável	Concordo parcialmente	Concordo totalmente	Concordo parcialmente	Concordo totalmente	Discordo parcialmente	Discordo totalmente	Discordo totalmente
114438900748	428177658	2023-10-17 10:58:55	2023-10-17 11:02:12	177.174.216.10					Aceito os termos acima e concordo em participar da pesquisa.	18-25	Masculino	Branca	Superior Incompleto	Não	De 1 a 3 salários mínimos (R$1.320 a R$3.960)	Não	Recanto Das Emas	SUS e Redes Particulares	Não	Não						Nenhuma condição		Provável	Provável	Provável	Provável	Provável	Muito improvável	Improvável	Provável	Muito provável	Improvável	Inútil	Muito Útil	Improvável	Muito provável	Muito provável	Concordo totalmente	Concordo totalmente	Concordo totalmente	Concordo totalmente	Concordo totalmente	Concordo totalmente	Concordo totalmente
114438896666	428177658	2023-10-17 10:47:54	2023-10-17 10:58:11	177.50.68.54					Aceito os termos acima e concordo em participar da pesquisa.	31-35	Feminino	Branca	Superior Completo	Sim, com vínculo empregatício	De 1 a 3 salários mínimos (R$1.320 a R$3.960)	Não	Recanto Das Emas	SUS	Sim	Não	Hipertensão/pressão alta							Provável	Provável	Improvável	Improvável	Improvável	Provável	Muito improvável	Provável	Muito improvável	Muito improvável	Útil	Útil	Improvável	Improvável	Muito improvável	Discordo parcialmente	Concordo parcialmente	Discordo parcialmente	Discordo parcialmente	Concordo parcialmente	Discordo parcialmente	Discordo parcialmente
114438892975	428177658	2023-10-17 10:44:17	2023-10-17 10:54:15	177.51.62.144					Aceito os termos acima e concordo em participar da pesquisa.	18-25	Feminino	Branca	Superior Incompleto	Não	Até 1 salário mínimo (R$ 1.320)	Não	Planaltina	SUS e Redes Particulares	Sim	Não	Hipertensão/pressão alta							Provável	Muito provável	Improvável	Provável	Provável	Provável	Muito provável	Muito provável	Provável	Improvável	Muito Útil	Útil	Provável	Provável	Muito improvável	Não concordo nem discordo	Concordo parcialmente	Não concordo nem discordo	Não concordo nem discordo	Discordo totalmente	Discordo totalmente	Discordo parcialmente
114438892302	428177658	2023-10-17 10:45:17	2023-10-17 10:53:34	177.51.63.96					Aceito os termos acima e concordo em participar da pesquisa.	18-25	Masculino	Branca	Ensino Médio completo	Não	Até 1 salário mínimo (R$ 1.320)	Sim	Água Claras	SUS	Não	Não						Nenhuma condição		Provável	Provável	Muito provável	Muito provável	Muito provável	Provável	Muito provável	Improvável	Muito provável	Improvável	Útil	Inútil	Provável	Provável	Muito improvável	Concordo totalmente	Concordo totalmente	Concordo parcialmente	Concordo totalmente	Discordo totalmente	Discordo totalmente	Discordo totalmente
114438885426	428177658	2023-10-17 10:39:59	2023-10-17 10:47:25	177.50.73.5					Aceito os termos acima e concordo em participar da pesquisa.	18-25	Masculino	Branca	Superior Incompleto	Sim, sem vínculo empregatício	De 1 a 3 salários mínimos (R$1.320 a R$3.960)	Não	Ceilândia	SUS	Não	Não						Nenhuma condição		Muito improvável	Muito improvável	Provável	Muito improvável	Provável	Provável	Provável	Muito improvável	Provável	Improvável	Muito Útil	Muito Útil	Muito provável	Muito provável	Muito provável	Concordo parcialmente	Concordo totalmente	Concordo totalmente	Concordo totalmente	Concordo totalmente	Discordo parcialmente	Concordo parcialmente
114438882927	428177658	2023-10-17 10:34:01	2023-10-17 10:44:47	104.28.63.98					Aceito os termos acima e concordo em participar da pesquisa.	26-30	Masculino	Parda	Superior Completo	Sim, sem vínculo empregatício	De 1 a 3 salários mínimos (R$1.320 a R$3.960)	Não	Plano Piloto	SUS e Redes Particulares	Não	Não						Nenhuma condição		Provável	Provável	Provável	Provável	Provável	Provável	Muito provável	Improvável	Muito improvável	Muito improvável	Muito Útil	Muito Útil	Provável	Provável	Provável	Concordo parcialmente	Concordo parcialmente	Concordo totalmente	Concordo totalmente	Não concordo nem discordo	Discordo parcialmente	Concordo parcialmente
114438877204	428177658	2023-10-17 10:31:16	2023-10-17 10:39:09	177.50.68.54					Aceito os termos acima e concordo em participar da pesquisa.	18-25	Feminino	Preta	Superior Incompleto	Não	Até 1 salário mínimo (R$ 1.320)	Não	Paranoá	SUS	Não	Não		Diabetes						Muito provável	Improvável	Provável	Provável	Provável	Provável	Provável	Provável	Provável	Improvável	Muito Útil	Inútil	Provável	Muito improvável	Provável	Não concordo nem discordo	Não concordo nem discordo	Concordo parcialmente	Concordo parcialmente	Discordo parcialmente	Discordo totalmente	Discordo totalmente
114438867814	428177658	2023-10-17 10:22:30	2023-10-17 10:30:25	177.50.77.102					Aceito os termos acima e concordo em participar da pesquisa.	26-30	Masculino	Parda	Superior Incompleto	Sim, com vínculo empregatício	De 1 a 3 salários mínimos (R$1.320 a R$3.960)	Não	Plano Piloto	SUS	Não	Não	Hipertensão/pressão alta							Provável	Muito provável	Provável	Muito provável	Improvável	Provável	Muito provável	Muito provável	Provável	Improvável	Muito Útil	Inútil	Muito provável	Muito provável	Provável	Não concordo nem discordo	Discordo totalmente	Discordo totalmente	Discordo parcialmente	Discordo totalmente	Discordo totalmente	Não concordo nem discordo
114438868268	428177658	2023-10-17 10:21:54	2023-10-17 10:30:20	177.50.66.80					Aceito os termos acima e concordo em participar da pesquisa.	18-25	Feminino	Branca	Superior Incompleto	Sim, sem vínculo empregatício	De 1 a 3 salários mínimos (R$1.320 a R$3.960)	Não	Plano Piloto	Redes Particulares	Sim	Não						Nenhuma condição		Provável	Provável	Provável	Muito provável	Muito provável	Muito provável	Muito provável	Muito provável	Provável	Improvável	Muito Útil	Útil	Provável	Provável	Improvável	Concordo parcialmente	Concordo totalmente	Concordo parcialmente	Concordo parcialmente	Discordo totalmente	Discordo totalmente	Discordo totalmente
114438858645	428177658	2023-10-17 10:07:42	2023-10-17 10:21:23	177.50.68.54					Aceito os termos acima e concordo em participar da pesquisa.	41-45	Masculino	Indígena	Ensino Médio completo	Sim, sem vínculo empregatício	De 3 a 6 salários mínimos (R$3.960 a R$7.920)	Não	Santa Maria	SUS	Não	Não						Nenhuma condição		Muito provável	Provável	Provável	Muito improvável	Muito improvável	Provável	Provável	Muito improvável	Muito improvável	Muito provável	Útil	Inútil	Muito improvável	Muito improvável	Muito improvável	Concordo parcialmente	Concordo parcialmente	Concordo parcialmente	Concordo parcialmente	Concordo totalmente	Concordo parcialmente	Concordo parcialmente
114438854251	428177658	2023-10-17 10:03:13	2023-10-17 10:17:01	177.174.218.24					Aceito os termos acima e concordo em participar da pesquisa.	18-25	Feminino	Parda	Superior Incompleto	Sim, sem vínculo empregatício	Até 1 salário mínimo (R$ 1.320)	Não	Brazlândia	SUS	Não	Não						Nenhuma condição		Muito provável	Muito provável	Muito provável	Provável	Provável	Muito improvável	Muito provável	Muito provável	Muito provável	Muito improvável	Útil	Muito Útil	Muito improvável	Provável	Muito improvável	Discordo totalmente	Discordo totalmente	Concordo parcialmente	Discordo totalmente	Discordo totalmente	Discordo totalmente	Não concordo nem discordo
114438852370	428177658	2023-10-17 10:04:20	2023-10-17 10:15:18	191.58.132.113					Aceito os termos acima e concordo em participar da pesquisa.	18-25	Feminino	Preta	Superior Incompleto	Não	De 10 a 20 salários mínimos (R$13.200 a R$26.400)	Não	Plano Piloto	Redes Particulares	Sim	Não			Depressão					Muito provável	Muito provável	Provável	Muito provável	Muito provável	Provável	Provável	Muito provável	Provável	Improvável	Muito Útil	Inútil	Provável	Provável	Improvável	Concordo totalmente	Concordo totalmente	Discordo parcialmente	Concordo totalmente	Discordo parcialmente	Discordo parcialmente	Discordo totalmente
114438844263	428177658	2023-10-17 09:59:03	2023-10-17 10:07:29	177.50.71.19					Aceito os termos acima e concordo em participar da pesquisa.	18-25	Feminino	Parda	Ensino Médio Incompleto	Não	Até 1 salário mínimo (R$ 1.320)	Não	Ceilândia	SUS e Redes Particulares	Sim	Não			Depressão					Provável	Muito provável	Muito provável	Muito provável	Muito provável	Muito provável	Muito provável	Provável	Muito provável	Improvável	Útil	Inútil	Muito improvável	Muito improvável	Provável	Concordo totalmente	Concordo totalmente	Concordo totalmente	Concordo totalmente	Discordo totalmente	Discordo totalmente	Não concordo nem discordo
114438835194	428177658	2023-10-17 09:51:21	2023-10-17 09:58:30	177.50.66.63					Aceito os termos acima e concordo em participar da pesquisa.	31-35	Masculino	Parda	Superior Completo	Sim, com vínculo empregatício	De 3 a 6 salários mínimos (R$3.960 a R$7.920)	Não	Santa Maria	SUS	Não	Não						Nenhuma condição		Provável	Muito provável	Improvável	Provável	Provável	Muito improvável	Provável	Muito provável	Provável	Improvável	Útil	Inútil	Improvável	Muito provável	Provável	Não concordo nem discordo	Discordo parcialmente	Não concordo nem discordo	Discordo parcialmente	Discordo parcialmente	Discordo parcialmente	Não concordo nem discordo
114438830215	428177658	2023-10-17 09:42:51	2023-10-17 09:52:24	177.174.223.218					Aceito os termos acima e concordo em participar da pesquisa.	18-25	Feminino	Branca	Superior Incompleto	Não	De 1 a 3 salários mínimos (R$1.320 a R$3.960)	Não	Taguatinga	SUS	Sim	Não	Hipertensão/pressão alta	Diabetes			Câncer, exceto de pele			Provável	Provável	Muito provável	Muito provável	Muito provável	Provável	Muito provável	Muito provável	Provável	Improvável	Muito Útil	Inútil	Muito provável	Muito provável	Muito provável	Discordo parcialmente	Não concordo nem discordo	Discordo totalmente	Não concordo nem discordo	Concordo parcialmente	Discordo totalmente	Discordo totalmente
114438829340	428177658	2023-10-17 09:44:43	2023-10-17 09:51:28	189.40.77.84					Aceito os termos acima e concordo em participar da pesquisa.	18-25	Feminino	Branca	Superior Incompleto	Sim, sem vínculo empregatício	Até 1 salário mínimo (R$ 1.320)	Não	Candangolândia	Redes Particulares	Não	Não			Depressão					Provável	Muito provável	Muito provável	Muito provável	Muito provável	Provável	Provável	Muito provável	Improvável	Improvável	Útil	Inútil	Provável	Muito provável	Improvável	Discordo parcialmente	Concordo parcialmente	Discordo parcialmente	Discordo parcialmente	Discordo totalmente	Discordo totalmente	Discordo totalmente
114438828927	428177658	2023-10-17 09:40:30	2023-10-17 09:51:01	177.50.66.63					Aceito os termos acima e concordo em participar da pesquisa.	26-30	Masculino	Branca	Ensino Médio completo	Não	Até 1 salário mínimo (R$ 1.320)	Não	Gama	SUS	Não	Não						Nenhuma condição		Muito provável	Muito provável	Provável	Provável	Provável	Improvável	Muito provável	Provável	Improvável	Provável	Útil	Útil	Provável	Provável	Provável	Concordo parcialmente	Concordo parcialmente	Concordo parcialmente	Concordo totalmente	Discordo totalmente	Discordo totalmente	Discordo parcialmente
114438819181	428177658	2023-10-17 09:30:33	2023-10-17 09:39:49	200.130.18.131					Aceito os termos acima e concordo em participar da pesquisa.	18-25	Feminino	Branca	Ensino Médio completo	Não	De 10 a 20 salários mínimos (R$13.200 a R$26.400)	Não	Água Claras	Redes Particulares	Não	Não						Nenhuma condição		Provável	Provável	Provável	Provável	Provável	Provável	Provável	Muito provável	Muito provável	Muito improvável	Muito Útil	Útil	Provável	Muito provável	Provável	Não concordo nem discordo	Concordo parcialmente	Concordo parcialmente	Concordo totalmente	Discordo parcialmente	Discordo totalmente	Discordo totalmente
114438816853	428177658	2023-10-17 09:20:16	2023-10-17 09:37:09	177.50.73.87					Aceito os termos acima e concordo em participar da pesquisa.	18-25	Feminino	Branca	Ensino Médio completo	Não	Até 1 salário mínimo (R$ 1.320)	Não	São Sebastião	SUS	Não	Não						Nenhuma condição		Provável	Muito improvável	Provável	Provável	Improvável	Improvável	Provável	Provável	Provável	Provável	Muito Útil	Útil	Provável	Provável	Provável	Concordo totalmente	Concordo totalmente	Concordo totalmente	Concordo totalmente	Não concordo nem discordo	Não concordo nem discordo	Discordo totalmente
114438801078	428177658	2023-10-17 09:05:01	2023-10-17 09:20:02	177.50.73.87					Aceito os termos acima e concordo em participar da pesquisa.	36-40	Feminino	Branca	Ensino Médio completo	Sim, com vínculo empregatício	De 1 a 3 salários mínimos (R$1.320 a R$3.960)	Não	Itapoã	SUS	Não	Não						Nenhuma condição		Provável	Muito provável	Improvável	Improvável	Provável	Improvável	Muito provável	Provável	Muito provável	Improvável	Muito Útil	Inútil	Improvável	Improvável	Provável	Discordo parcialmente	Concordo totalmente	Concordo totalmente	Concordo parcialmente	Concordo totalmente	Discordo parcialmente	Discordo parcialmente
114438313913	428177658	2023-10-16 19:00:59	2023-10-16 19:06:14	200.173.236.243					Aceito os termos acima e concordo em participar da pesquisa.	26-30	Feminino	Parda	Superior Completo	Sim, com vínculo empregatício	De 3 a 6 salários mínimos (R$3.960 a R$7.920)	Sim	Água Claras	SUS e Redes Particulares	Não	Não						Nenhuma condição		Provável	Provável	Improvável	Provável	Provável	Provável	Muito provável	Provável	Muito provável	Muito improvável	Muito Útil	Muito Útil	Provável	Provável	Provável	Concordo parcialmente	Concordo totalmente	Concordo parcialmente	Concordo totalmente	Discordo totalmente	Discordo totalmente	Discordo totalmente
114438266808	428177658	2023-10-16 17:18:20	2023-10-16 18:04:58	187.28.50.3					Aceito os termos acima e concordo em participar da pesquisa.	18-25	Feminino	Parda	Superior Incompleto	Sim, sem vínculo empregatício	De 1 a 3 salários mínimos (R$1.320 a R$3.960)	Não	Samambaia	SUS	Não	Não						Nenhuma condição		Provável	Muito provável	Provável	Provável	Provável	Muito provável	Muito provável	Muito provável	Muito provável	Provável	Muito Útil	Útil	Provável	Muito provável	Improvável	Concordo parcialmente	Concordo parcialmente	Não concordo nem discordo	Não concordo nem discordo	Discordo totalmente	Discordo totalmente	Discordo totalmente
114438258986	428177658	2023-10-16 17:47:02	2023-10-16 17:55:50	189.40.77.172					Aceito os termos acima e concordo em participar da pesquisa.	18-25	Masculino	Preta	Ensino Médio completo	Sim, sem vínculo empregatício	Até 1 salário mínimo (R$ 1.320)	Não	São Sebastião	SUS	Não	Não						Nenhuma condição		Provável	Improvável	Improvável	Provável	Provável	Improvável	Provável	Muito provável	Muito improvável	Muito provável	Útil	Inútil	Muito improvável	Muito provável	Muito improvável	Discordo parcialmente	Discordo parcialmente	Discordo parcialmente	Não concordo nem discordo	Discordo totalmente	Discordo totalmente	Discordo totalmente
114438250773	428177658	2023-10-16 17:36:23	2023-10-16 17:46:48	189.40.77.172					Aceito os termos acima e concordo em participar da pesquisa.	26-30	Feminino	Parda	Ensino Médio completo	Sim, com vínculo empregatício	De 1 a 3 salários mínimos (R$1.320 a R$3.960)	Não	Planaltina	SUS e Redes Particulares	Não	Não						Nenhuma condição		Provável	Improvável	Provável	Muito provável	Provável	Improvável	Provável	Muito provável	Muito provável	Provável	Muito Útil	Útil	Provável	Provável	Muito improvável	Concordo totalmente	Concordo parcialmente	Concordo totalmente	Concordo totalmente	Concordo parcialmente	Não concordo nem discordo	Discordo totalmente
114438241622	428177658	2023-10-16 17:28:23	2023-10-16 17:36:09	189.40.77.172					Aceito os termos acima e concordo em participar da pesquisa.	26-30	Masculino	Preta	Superior Incompleto	Sim, com vínculo empregatício	De 1 a 3 salários mínimos (R$1.320 a R$3.960)	Sim	Recanto Das Emas	SUS	Não	Não						Nenhuma condição		Muito improvável	Provável	Provável	Provável	Provável	Provável	Provável	Muito provável	Provável	Provável	Muito Útil	Muito Útil	Muito provável	Muito provável	Muito provável	Concordo totalmente	Concordo totalmente	Não concordo nem discordo	Concordo totalmente	Discordo totalmente	Discordo totalmente	Discordo totalmente
114438233927	428177658	2023-10-16 17:16:57	2023-10-16 17:28:08	189.40.77.172					Aceito os termos acima e concordo em participar da pesquisa.	26-50	Masculino	Branca	Fundamental incompleto	Sim, com vínculo empregatício	De 3 a 6 salários mínimos (R$3.960 a R$7.920)	Sim	Planaltina	SUS	Não	Não						Nenhuma condição		Provável	Provável	Provável	Provável	Provável	Provável	Provável	Muito provável	Provável	Provável	Muito Útil	Muito Útil	Provável	Provável	Improvável	Discordo totalmente	Discordo totalmente	Discordo parcialmente	Discordo parcialmente	Discordo parcialmente	Discordo totalmente	Discordo totalmente
114438222504	428177658	2023-10-16 17:05:44	2023-10-16 17:16:47	189.40.77.172					Aceito os termos acima e concordo em participar da pesquisa.	26-30	Feminino	Preta	Superior Completo	Sim, com vínculo empregatício	De 1 a 3 salários mínimos (R$1.320 a R$3.960)	Não	Planaltina	SUS	Sim	Não			Depressão					Provável	Muito provável	Provável	Improvável	Muito provável	Improvável	Muito provável	Provável	Muito provável	Muito improvável	Inútil	Útil	Muito provável	Improvável	Provável	Concordo parcialmente	Concordo totalmente	Concordo totalmente	Concordo totalmente	Discordo totalmente	Discordo totalmente	Discordo totalmente
114438211611	428177658	2023-10-16 16:59:21	2023-10-16 17:05:16	189.40.77.172					Aceito os termos acima e concordo em participar da pesquisa.	26-30	Feminino	Preta	Superior Incompleto	Sim, sem vínculo empregatício	Até 1 salário mínimo (R$ 1.320)	Não	Ceilândia	SUS	Não	Não						Nenhuma condição		Provável	Provável	Provável	Provável	Provável	Provável	Muito provável	Muito provável	Muito provável	Improvável	Muito Útil	Útil	Provável	Muito provável	Muito provável	Concordo parcialmente	Concordo totalmente	Discordo parcialmente	Concordo parcialmente	Discordo totalmente	Discordo totalmente	Discordo totalmente
114438205587	428177658	2023-10-16 16:41:30	2023-10-16 16:59:08	189.40.77.172					Aceito os termos acima e concordo em participar da pesquisa.	31-35	Masculino	Branca	Ensino Médio completo	Sim, com vínculo empregatício	De 1 a 3 salários mínimos (R$1.320 a R$3.960)	Não	Ceilândia	SUS e Redes Particulares	Não	Não						Nenhuma condição		Provável	Provável	Muito provável	Muito provável	Improvável	Provável	Muito provável	Muito improvável	Muito improvável	Muito improvável	Útil	Muito Inútil	Provável	Muito provável	Provável	Concordo totalmente	Discordo totalmente	Concordo totalmente	Discordo totalmente	Concordo parcialmente	Discordo parcialmente	Discordo totalmente
114438188580	428177658	2023-10-16 16:35:04	2023-10-16 16:41:19	189.40.77.172					Aceito os termos acima e concordo em participar da pesquisa.	18-25	Feminino	Parda	Fundamental incompleto	Não	Até 1 salário mínimo (R$ 1.320)	Não	Taguatinga	SUS	Não	Não			Depressão					Provável	Improvável	Muito improvável	Muito provável	Muito improvável	Improvável	Provável	Improvável	Provável	Improvável	Muito Útil	Muito Útil	Muito provável	Improvável	Muito provável	Discordo parcialmente	Não concordo nem discordo	Não concordo nem discordo	Não concordo nem discordo	Não concordo nem discordo	Não concordo nem discordo	Não concordo nem discordo
114438182261	428177658	2023-10-16 16:25:03	2023-10-16 16:34:43	189.40.77.172					Aceito os termos acima e concordo em participar da pesquisa.	18-25	Feminino	Parda	Superior Incompleto	Sim, com vínculo empregatício	Até 1 salário mínimo (R$ 1.320)	Sim	Santa Maria	SUS	Não	Não			Depressão				Endometriose	Provável	Provável	Muito provável	Muito provável	Provável	Provável	Provável	Improvável	Muito provável	Muito improvável	Útil	Útil	Improvável	Improvável	Provável	Concordo totalmente	Concordo totalmente	Concordo totalmente	Concordo totalmente	Discordo totalmente	Discordo totalmente	Concordo totalmente
114438172024	428177658	2023-10-16 16:16:18	2023-10-16 16:24:34	189.40.77.172					Aceito os termos acima e concordo em participar da pesquisa.	26-50	Masculino	Parda	Superior Completo	Sim, com vínculo empregatício	De 3 a 6 salários mínimos (R$3.960 a R$7.920)	Não	Planaltina	SUS e Redes Particulares	Não	Não						Nenhuma condição		Provável	Improvável	Improvável	Muito provável	Provável	Improvável	Muito provável	Muito provável	Improvável	Provável	Útil	Inútil	Improvável	Provável	Improvável	Concordo parcialmente	Concordo parcialmente	Concordo parcialmente	Concordo parcialmente	Discordo parcialmente	Discordo totalmente	Concordo totalmente
114438166168	428177658	2023-10-16 12:50:03	2023-10-16 16:18:41	187.32.139.50					Aceito os termos acima e concordo em participar da pesquisa.	18-25	Feminino	Parda	Superior Incompleto	Sim, com vínculo empregatício	De 1 a 3 salários mínimos (R$1.320 a R$3.960)	Não	Guará	SUS	Não	Não						Nenhuma condição		Provável	Muito provável	Provável	Provável	Provável	Provável	Provável	Improvável	Improvável	Provável	Útil	Inútil	Provável	Muito provável	Improvável	Concordo parcialmente	Concordo parcialmente	Concordo parcialmente	Concordo totalmente	Discordo parcialmente	Discordo totalmente	Discordo totalmente
114438163338	428177658	2023-10-16 16:04:27	2023-10-16 16:15:53	189.40.77.172					Aceito os termos acima e concordo em participar da pesquisa.	18-25	Masculino	Preta	Ensino Médio Incompleto	Sim, sem vínculo empregatício	De 1 a 3 salários mínimos (R$1.320 a R$3.960)	Não	Itapoã	SUS	Não	Não						Nenhuma condição		Provável	Provável	Provável	Muito provável	Muito provável	Provável	Provável	Provável	Provável	Improvável	Útil	Útil	Provável	Improvável	Provável	Não concordo nem discordo	Não concordo nem discordo	Concordo totalmente	Concordo parcialmente	Discordo parcialmente	Discordo parcialmente	Discordo parcialmente
114438151509	428177658	2023-10-16 15:51:10	2023-10-16 16:04:08	189.40.77.172					Aceito os termos acima e concordo em participar da pesquisa.	26-50	Feminino	Branca	Ensino Médio completo	Sim, sem vínculo empregatício	Até 1 salário mínimo (R$ 1.320)	Não	Lago Norte	SUS	Não	Não			Depressão			Nenhuma condição		Muito provável	Provável	Muito provável	Provável	Provável	Provável	Muito provável	Muito provável	Muito provável	Improvável	Muito Útil	Útil	Provável	Provável	Improvável	Concordo totalmente	Concordo parcialmente	Discordo parcialmente	Discordo parcialmente	Discordo parcialmente	Discordo totalmente	Discordo totalmente
114438130717	428177658	2023-10-16 15:35:30	2023-10-16 15:44:53	189.40.76.29					Aceito os termos acima e concordo em participar da pesquisa.	26-30	Feminino	Parda	Ensino Médio completo	Sim, sem vínculo empregatício	De 3 a 6 salários mínimos (R$3.960 a R$7.920)	Sim	Planaltina	SUS e Redes Particulares	Não	Não						Nenhuma condição		Provável	Provável	Provável	Provável	Provável	Provável	Provável	Muito improvável	Provável	Improvável	Muito Útil	Muito Útil	Provável	Muito provável	Muito provável	Discordo parcialmente	Discordo parcialmente	Concordo totalmente	Discordo totalmente	Discordo totalmente	Discordo totalmente	Discordo totalmente
114438119953	428177658	2023-10-16 15:20:27	2023-10-16 15:35:19	189.40.76.29					Aceito os termos acima e concordo em participar da pesquisa.	31-35	Masculino	Parda	Superior Incompleto	Sim, com vínculo empregatício	Até 1 salário mínimo (R$ 1.320)	Não	Vicente Pires	SUS e Redes Particulares	Não	Não						Nenhuma condição		Provável	Provável	Provável	Provável	Provável	Improvável	Muito provável	Muito provável	Provável	Improvável	Útil	Inútil	Provável	Muito provável	Improvável	Discordo totalmente	Concordo totalmente	Concordo parcialmente	Não concordo nem discordo	Concordo parcialmente	Concordo parcialmente	Discordo totalmente
114438103941	428177658	2023-10-16 15:14:44	2023-10-16 15:20:12	189.40.76.29					Aceito os termos acima e concordo em participar da pesquisa.	31-35	Feminino	Branca	Superior Completo	Sim, com vínculo empregatício	De 1 a 3 salários mínimos (R$1.320 a R$3.960)	Não	Candangolândia	SUS	Não	Não						Nenhuma condição		Improvável	Provável	Provável	Muito provável	Muito provável	Provável	Provável	Provável	Provável	Provável	Útil	Útil	Provável	Improvável	Provável	Concordo parcialmente	Concordo parcialmente	Concordo parcialmente	Concordo parcialmente	Discordo parcialmente	Discordo totalmente	Discordo totalmente
114438097680	428177658	2023-10-16 15:05:50	2023-10-16 15:14:32	189.40.76.29					Aceito os termos acima e concordo em participar da pesquisa.	18-25	Masculino	Preta	Ensino Médio completo	Não	Até 1 salário mínimo (R$ 1.320)	Não	Paranoá	SUS	Não	Não						Nenhuma condição		Improvável	Improvável	Improvável	Improvável	Improvável	Improvável	Improvável	Improvável	Muito improvável	Muito provável	Útil	Útil	Muito improvável	Muito improvável	Improvável	Concordo totalmente	Concordo parcialmente	Concordo parcialmente	Concordo parcialmente	Concordo parcialmente	Concordo parcialmente	Não concordo nem discordo
114438087918	428177658	2023-10-16 14:52:54	2023-10-16 15:05:40	189.40.76.29					Aceito os termos acima e concordo em participar da pesquisa.	26-30	Masculino	Preta	Superior Completo	Sim, com vínculo empregatício	De 3 a 6 salários mínimos (R$3.960 a R$7.920)	Sim	Taguatinga	SUS	Não	Não			Depressão					Provável	Muito provável	Muito provável	Muito provável	Provável	Muito provável	Muito provável	Muito provável	Muito provável	Muito provável	Muito Útil	Útil	Muito provável	Muito provável	Muito provável	Discordo totalmente	Discordo totalmente	Concordo totalmente	Concordo totalmente	Discordo totalmente	Concordo totalmente	Discordo totalmente
114438074550	428177658	2023-10-16 14:43:59	2023-10-16 14:52:43	189.40.76.29					Aceito os termos acima e concordo em participar da pesquisa.	36-40	Masculino	Branca	Ensino Médio completo	Sim, sem vínculo empregatício	De 6 a 9 salários mínimos (R$7.920 a R$11.880)	Não	Plano Piloto	SUS	Sim	Não		Diabetes						Provável	Provável	Provável	Provável	Improvável	Provável	Improvável	Provável	Improvável	Improvável	Útil	Útil	Provável	Provável	Improvável	Não concordo nem discordo	Concordo parcialmente	Concordo parcialmente	Concordo parcialmente	Concordo totalmente	Discordo parcialmente	Discordo totalmente
114438065403	428177658	2023-10-16 14:36:47	2023-10-16 14:43:46	189.40.76.29					Aceito os termos acima e concordo em participar da pesquisa.	18-25	Feminino	Preta	Ensino Médio Incompleto	Sim, com vínculo empregatício	Até 1 salário mínimo (R$ 1.320)	Não	São Sebastião	SUS	Não	Não						Nenhuma condição		Provável	Provável	Provável	Provável	Improvável	Muito provável	Muito provável	Muito provável	Improvável	Provável	Útil	Útil	Provável	Provável	Provável	Concordo totalmente	Concordo totalmente	Concordo totalmente	Concordo totalmente	Concordo totalmente	Concordo totalmente	Concordo totalmente
114438057232	428177658	2023-10-16 14:27:30	2023-10-16 14:35:42	189.40.76.29					Aceito os termos acima e concordo em participar da pesquisa.	31-35	Masculino	Branca	Superior Incompleto	Sim, com vínculo empregatício	De 3 a 6 salários mínimos (R$3.960 a R$7.920)	Sim	Samambaia	SUS e Redes Particulares	Sim	Não						Nenhuma condição		Improvável	Provável	Provável	Provável	Provável	Provável	Provável	Provável	Provável	Provável	Útil	Útil	Provável	Provável	Provável	Concordo totalmente	Concordo totalmente	Concordo totalmente	Concordo totalmente	Discordo parcialmente	Discordo parcialmente	Discordo parcialmente
114438049187	428177658	2023-10-16 14:10:57	2023-10-16 14:27:19	189.40.76.29					Aceito os termos acima e concordo em participar da pesquisa.	50+	Masculino	Preta	Fundamental incompleto	Não	De 1 a 3 salários mínimos (R$1.320 a R$3.960)	Sim	Plano Piloto	SUS	Sim	Sim					Câncer, exceto de pele			Improvável	Muito provável	Provável	Improvável	Improvável	Provável	Muito provável	Muito provável	Muito improvável	Muito provável	Muito Útil	Inútil	Provável	Muito provável	Provável	Concordo totalmente	Discordo parcialmente	Concordo parcialmente	Concordo parcialmente	Discordo totalmente	Concordo totalmente	Concordo totalmente
114438033271	428177658	2023-10-16 14:03:31	2023-10-16 14:10:35	189.40.76.29					Aceito os termos acima e concordo em participar da pesquisa.	18-25	Masculino	Preta	Ensino Médio Incompleto	Sim, com vínculo empregatício	De 1 a 3 salários mínimos (R$1.320 a R$3.960)	Não	Guará	SUS	Não	Não						Nenhuma condição		Provável	Provável	Provável	Provável	Muito provável	Provável	Provável	Muito provável	Muito provável	Muito provável	Muito Inútil	Muito Inútil	Provável	Provável	Provável	Concordo totalmente	Concordo totalmente	Concordo totalmente	Concordo totalmente	Discordo parcialmente	Concordo totalmente	Discordo parcialmente
114438026235	428177658	2023-10-16 13:21:16	2023-10-16 14:03:12	189.40.76.29					Aceito os termos acima e concordo em participar da pesquisa.	18-25	Feminino	Parda	Superior Incompleto	Sim, sem vínculo empregatício	De 1 a 3 salários mínimos (R$1.320 a R$3.960)	Não	Gama	SUS	Não	Não						Nenhuma condição		Provável	Provável	Provável	Improvável	Muito provável	Provável	Muito provável	Muito provável	Provável	Muito improvável	Muito Útil	Muito Útil	Provável	Provável	Improvável	Discordo parcialmente	Discordo totalmente	Concordo totalmente	Concordo parcialmente	Concordo parcialmente	Discordo totalmente	Discordo totalmente
114438025416	428177658	2023-10-16 12:37:11	2023-10-16 14:02:23	24.152.14.241					Aceito os termos acima e concordo em participar da pesquisa.	18-25	Feminino	Parda	Ensino Médio completo	Sim, com vínculo empregatício	De 1 a 3 salários mínimos (R$1.320 a R$3.960)	Não	Santa Maria	Redes Particulares	Não	Não						Nenhuma condição		Provável	Muito provável	Provável	Provável	Muito provável	Muito provável	Muito provável	Provável	Muito provável	Muito improvável	Útil	Inútil	Muito provável	Muito provável	Muito provável	Concordo totalmente	Concordo totalmente	Concordo parcialmente	Concordo totalmente	Discordo parcialmente	Discordo parcialmente	Discordo totalmente
114437984561	428177658	2023-10-16 12:33:16	2023-10-16 13:20:57	189.40.76.29					Aceito os termos acima e concordo em participar da pesquisa.	50+	Masculino	Parda	Superior Completo	Não	De 3 a 6 salários mínimos (R$3.960 a R$7.920)	Não	Taguatinga	SUS e Redes Particulares	Sim	Não	Hipertensão/pressão alta							Improvável	Provável	Improvável	Provável	Provável	Improvável	Muito provável	Provável	Muito provável	Provável	Muito Útil	Inútil	Provável	Muito provável	Provável	Concordo totalmente	Concordo totalmente	Concordo parcialmente	Concordo totalmente	Discordo parcialmente	Discordo parcialmente	Discordo parcialmente
114437931894	428177658	2023-10-16 12:13:54	2023-10-16 12:32:49	189.40.76.8					Aceito os termos acima e concordo em participar da pesquisa.	36-40	Feminino	Branca	Superior Completo	Sim, com vínculo empregatício	De 3 a 6 salários mínimos (R$3.960 a R$7.920)	Não	Plano Piloto	SUS e Redes Particulares	Não	Não						Nenhuma condição		Provável	Muito provável	Provável	Muito provável	Muito provável	Muito provável	Muito provável	Muito provável	Provável	Muito provável	Muito Útil	Útil	Provável	Muito provável	Muito improvável	Concordo parcialmente	Concordo parcialmente	Discordo parcialmente	Concordo parcialmente	Discordo totalmente	Discordo totalmente	Discordo totalmente
114437912137	428177658	2023-10-16 11:48:54	2023-10-16 12:13:38	189.40.76.8					Aceito os termos acima e concordo em participar da pesquisa.	41-45	Feminino	Parda	Ensino Médio completo	Sim, sem vínculo empregatício	De 1 a 3 salários mínimos (R$1.320 a R$3.960)	Não	Planaltina	SUS e Redes Particulares	Não	Não						Nenhuma condição		Provável	Provável	Provável	Provável	Provável	Provável	Provável	Improvável	Provável	Provável	Muito Útil	Útil	Provável	Provável	Improvável	Discordo parcialmente	Discordo parcialmente	Concordo parcialmente	Discordo totalmente	Discordo totalmente	Discordo totalmente	Discordo totalmente
114437912099	428177658	2023-10-16 12:02:08	2023-10-16 12:13:36	186.195.36.12					Aceito os termos acima e concordo em participar da pesquisa.	18-25	Feminino	Branca	Ensino Médio completo	Sim, com vínculo empregatício	Até 1 salário mínimo (R$ 1.320)	Não	Samambaia	SUS e Redes Particulares	Não	Não						Nenhuma condição		Provável	Muito provável	Provável	Muito provável	Muito provável	Provável	Provável	Muito provável	Provável	Improvável	Muito Útil	Útil	Provável	Muito provável	Improvável	Concordo parcialmente	Concordo parcialmente	Concordo totalmente	Concordo totalmente	Concordo parcialmente	Concordo parcialmente	Discordo totalmente
114437903561	428177658	2023-10-16 12:01:17	2023-10-16 12:05:20	172.226.98.5					Aceito os termos acima e concordo em participar da pesquisa.	26-30	Masculino	Branca	Superior Completo	Sim, com vínculo empregatício	De 3 a 6 salários mínimos (R$3.960 a R$7.920)	Não	Samambaia	Redes Particulares	Sim	Não			Depressão					Improvável	Muito improvável	Provável	Muito provável	Provável	Provável	Provável	Provável	Provável	Provável	Muito Útil	Muito Útil	Provável	Provável	Provável	Não concordo nem discordo	Não concordo nem discordo	Discordo parcialmente	Não concordo nem discordo	Não concordo nem discordo	Discordo totalmente	Discordo totalmente
114437885516	428177658	2023-10-16 11:23:24	2023-10-16 11:48:14	189.40.76.8					Aceito os termos acima e concordo em participar da pesquisa.	26-30	Feminino	Parda	Superior Completo	Sim, com vínculo empregatício	De 3 a 6 salários mínimos (R$3.960 a R$7.920)	Não	Plano Piloto	SUS e Redes Particulares	Não	Não						Nenhuma condição		Provável	Muito provável	Muito provável	Provável	Muito provável	Provável	Muito provável	Provável	Muito provável	Improvável	Muito Útil	Inútil	Provável	Provável	Provável	Concordo totalmente	Concordo totalmente	Concordo parcialmente	Concordo totalmente	Discordo parcialmente	Discordo totalmente	Discordo parcialmente
114437858184	428177658	2023-10-16 10:55:32	2023-10-16 11:23:07	189.40.76.8					Aceito os termos acima e concordo em participar da pesquisa.	41-45	Feminino	Branca	Superior Completo	Não	De 3 a 6 salários mínimos (R$3.960 a R$7.920)	Não	Planaltina	SUS e Redes Particulares	Não	Não						Nenhuma condição		Provável	Provável	Muito improvável	Muito provável	Muito provável	Provável	Muito provável	Muito improvável	Muito provável	Muito improvável	Muito Útil	Muito Inútil	Muito provável	Improvável	Improvável	Discordo totalmente	Concordo parcialmente	Concordo parcialmente	Concordo totalmente	Discordo totalmente	Discordo totalmente	Discordo totalmente
114437847256	428177658	2023-10-16 10:58:06	2023-10-16 11:13:06	200.173.228.132					Aceito os termos acima e concordo em participar da pesquisa.	26-50	Masculino	Branca	Superior Completo	Sim, com vínculo empregatício	De 10 a 20 salários mínimos (R$13.200 a R$26.400)	Não	Vicente Pires	SUS e Redes Particulares	Não	Não						Nenhuma condição		Provável	Provável	Provável	Improvável	Provável	Provável	Provável	Improvável	Muito improvável	Muito improvável	Muito Útil	Inútil	Provável	Muito provável	Provável	Concordo totalmente	Discordo totalmente	Concordo totalmente	Concordo parcialmente	Discordo totalmente	Discordo totalmente	Discordo totalmente
114437842682	428177658	2023-10-16 10:55:08	2023-10-16 11:08:56	191.56.47.84					Aceito os termos acima e concordo em participar da pesquisa.	31-35	Feminino	Preta	Ensino Médio completo	Sim, sem vínculo empregatício	De 1 a 3 salários mínimos (R$1.320 a R$3.960)	Não	Água Claras	SUS	Não	Sim							Cisto e nódulo mamário	Provável	Provável	Provável	Muito provável	Provável	Provável	Muito provável	Muito provável	Provável	Improvável	Muito Útil	Útil	Provável	Muito provável	Provável	Discordo parcialmente	Discordo totalmente	Discordo parcialmente	Não concordo nem discordo	Discordo parcialmente	Discordo totalmente	Discordo totalmente
114437827199	428177658	2023-10-16 10:43:36	2023-10-16 10:53:14	189.40.76.8					Aceito os termos acima e concordo em participar da pesquisa.	31-35	Feminino	Indígena	Ensino Médio completo	Não	Até 1 salário mínimo (R$ 1.320)	Não	Guará	SUS	Sim	Não						Nenhuma condição		Provável	Provável	Improvável	Provável	Provável	Provável	Muito provável	Muito provável	Provável	Improvável	Muito Útil	Inútil	Improvável	Muito provável	Provável	Concordo parcialmente	Concordo parcialmente	Concordo parcialmente	Concordo totalmente	Discordo totalmente	Discordo totalmente	Discordo totalmente
114437817305	428177658	2023-10-16 10:31:39	2023-10-16 10:43:18	189.40.76.8					Aceito os termos acima e concordo em participar da pesquisa.	26-50	Feminino	Parda	Fundamental incompleto	Não	Até 1 salário mínimo (R$ 1.320)	Não	São Sebastião	SUS	Não	Não						Nenhuma condição		Provável	Provável	Provável	Provável	Provável	Provável	Provável	Muito provável	Provável	Provável	Muito Útil	Útil	Provável	Provável	Provável	Concordo totalmente	Concordo parcialmente	Discordo parcialmente	Concordo totalmente	Discordo totalmente	Discordo totalmente	Discordo totalmente
114437805439	428177658	2023-10-16 10:16:15	2023-10-16 10:31:24	189.40.76.8					Aceito os termos acima e concordo em participar da pesquisa.	36-40	Masculino	Branca	Superior Completo	Sim, sem vínculo empregatício	De 3 a 6 salários mínimos (R$3.960 a R$7.920)	Não	Plano Piloto	SUS e Redes Particulares	Não	Não						Nenhuma condição		Improvável	Provável	Provável	Muito provável	Provável	Provável	Muito provável	Provável	Muito provável	Improvável	Útil	Útil	Provável	Provável	Improvável	Concordo parcialmente	Discordo parcialmente	Concordo parcialmente	Concordo totalmente	Discordo totalmente	Discordo totalmente	Discordo totalmente
114437789812	428177658	2023-10-16 09:59:52	2023-10-16 10:15:44	189.40.76.8					Aceito os termos acima e concordo em participar da pesquisa.	26-50	Feminino	Parda	Superior Incompleto	Não	De 1 a 3 salários mínimos (R$1.320 a R$3.960)	Não	Sol Nascente/Pôr do Sol	SUS	Sim	Não	Hipertensão/pressão alta						Fibromialgia	Provável	Muito provável	Muito provável	Provável	Muito provável	Provável	Muito provável	Muito provável	Muito provável	Provável	Muito Útil	Útil	Provável	Muito provável	Provável	Concordo parcialmente	Discordo parcialmente	Discordo parcialmente	Discordo parcialmente	Concordo parcialmente	Discordo totalmente	Concordo parcialmente
114437778778	428177658	2023-10-16 09:48:34	2023-10-16 10:05:08	177.174.211.135					Aceito os termos acima e concordo em participar da pesquisa.	36-40	Masculino	Parda	Superior Completo	Sim, com vínculo empregatício	De 6 a 9 salários mínimos (R$7.920 a R$11.880)	Não	Samambaia	SUS e Redes Particulares	Sim	Não						Nenhuma condição		Improvável	Provável	Improvável	Provável	Improvável	Provável	Provável	Muito improvável	Improvável	Improvável	Útil	Útil	Provável	Muito improvável	Muito improvável	Concordo parcialmente	Não concordo nem discordo	Concordo parcialmente	Concordo parcialmente	Discordo parcialmente	Discordo totalmente	Discordo totalmente
114437773837	428177658	2023-10-16 09:47:38	2023-10-16 09:59:42	189.40.76.8					Aceito os termos acima e concordo em participar da pesquisa.	41-45	Feminino	Parda	Fundamental incompleto	Sim, sem vínculo empregatício	Até 1 salário mínimo (R$ 1.320)	Não	Planaltina	SUS e Redes Particulares	Não	Não						Nenhuma condição		Provável	Provável	Provável	Provável	Provável	Provável	Provável	Muito provável	Provável	Improvável	Muito Útil	Muito Útil	Provável	Provável	Provável	Concordo totalmente	Discordo totalmente	Concordo totalmente	Concordo totalmente	Discordo parcialmente	Discordo totalmente	Discordo totalmente
114436733799	428177658	2023-10-14 06:57:17	2023-10-14 07:22:07	177.174.213.143					Aceito os termos acima e concordo em participar da pesquisa.	18-25	Masculino	Branca	Superior Incompleto	Sim, com vínculo empregatício	Até 1 salário mínimo (R$ 1.320)	Não	Planaltina	SUS e Redes Particulares	Não	Não		Diabetes						Provável	Provável	Improvável	Muito provável	Muito provável	Provável	Improvável	Muito provável	Provável	Provável	Muito Útil	Útil	Provável	Provável	Improvável	Discordo parcialmente	Não concordo nem discordo	Concordo parcialmente	Concordo totalmente	Discordo parcialmente	Concordo parcialmente	Discordo totalmente
114436443796	428177658	2023-10-13 17:22:01	2023-10-13 17:43:20	177.51.63.107					Aceito os termos acima e concordo em participar da pesquisa.	18-25	Feminino	Branca	Superior Incompleto	Não	Até 1 salário mínimo (R$ 1.320)	Não	Planaltina	SUS e Redes Particulares	Não	Não						Nenhuma condição		Provável	Muito provável	Provável	Muito provável	Muito provável	Provável	Muito provável	Provável	Provável	Improvável	Muito Útil	Útil	Provável	Provável	Improvável	Concordo parcialmente	Concordo totalmente	Discordo parcialmente	Concordo totalmente	Discordo parcialmente	Discordo totalmente	Discordo totalmente
114436428992	428177658	2023-10-13 17:10:36	2023-10-13 17:21:07	177.51.62.4					Aceito os termos acima e concordo em participar da pesquisa.	26-50	Feminino	Branca	Superior Completo	Sim, com vínculo empregatício	De 3 a 6 salários mínimos (R$3.960 a R$7.920)	Não	Planaltina	SUS e Redes Particulares	Não	Não						Nenhuma condição		Provável	Muito provável	Muito improvável	Muito provável	Muito provável	Provável	Muito provável	Muito provável	Muito provável	Improvável	Muito Útil	Inútil	Provável	Muito provável	Provável	Concordo totalmente	Concordo totalmente	Concordo parcialmente	Concordo totalmente	Discordo totalmente	Discordo totalmente	Discordo totalmente
114436421652	428177658	2023-10-13 17:00:01	2023-10-13 17:10:22	177.51.62.4					Aceito os termos acima e concordo em participar da pesquisa.	26-30	Feminino	Branca	Ensino Médio completo	Não	Até 1 salário mínimo (R$ 1.320)	Não	Itapoã	SUS e Redes Particulares	Não	Não						Nenhuma condição		Provável	Provável	Provável	Provável	Provável	Provável	Provável	Provável	Muito provável	Provável	Útil	Útil	Provável	Provável	Provável	Concordo parcialmente	Não concordo nem discordo	Concordo totalmente	Concordo parcialmente	Discordo totalmente	Discordo totalmente	Discordo totalmente
114436413430	428177658	2023-10-13 16:48:41	2023-10-13 16:59:33	177.51.62.4					Aceito os termos acima e concordo em participar da pesquisa.	26-50	Feminino	Parda	Ensino Médio Incompleto	Sim, com vínculo empregatício	De 1 a 3 salários mínimos (R$1.320 a R$3.960)	Não	Planaltina	SUS e Redes Particulares	Não	Não						Nenhuma condição		Provável	Provável	Muito provável	Provável	Provável	Provável	Provável	Provável	Muito provável	Provável	Muito Útil	Útil	Provável	Provável	Provável	Discordo parcialmente	Concordo parcialmente	Discordo totalmente	Discordo parcialmente	Discordo totalmente	Discordo parcialmente	Discordo totalmente
114436413129	428177658	2023-10-13 16:49:41	2023-10-13 16:59:03	177.174.220.195					Aceito os termos acima e concordo em participar da pesquisa.	18-25	Feminino	Branca	Superior Incompleto	Não	Até 1 salário mínimo (R$ 1.320)	Sim	Planaltina	SUS	Não	Não							ansiedade	Improvável	Provável	Provável	Provável	Muito provável	Provável	Provável	Provável	Muito provável	Improvável	Muito Útil	Inútil	Provável	Muito provável	Improvável	Concordo totalmente	Concordo totalmente	Concordo parcialmente	Concordo totalmente	Discordo parcialmente	Discordo totalmente	Discordo totalmente
114436399406	428177658	2023-10-13 16:33:40	2023-10-13 16:40:07	177.51.62.4					Aceito os termos acima e concordo em participar da pesquisa.	26-30	Feminino	Preta	Ensino Médio Incompleto	Sim, com vínculo empregatício	Até 1 salário mínimo (R$ 1.320)	Não	Planaltina	SUS	Não	Não						Nenhuma condição		Provável	Muito provável	Provável	Muito provável	Muito provável	Provável	Muito provável	Muito provável	Muito provável	Provável	Muito Útil	Inútil	Improvável	Provável	Provável	Concordo parcialmente	Concordo totalmente	Discordo parcialmente	Concordo totalmente	Discordo totalmente	Discordo totalmente	Discordo totalmente
114436394453	428177658	2023-10-13 16:25:46	2023-10-13 16:33:29	177.51.62.4					Aceito os termos acima e concordo em participar da pesquisa.	26-30	Feminino	Branca	Superior Completo	Sim, sem vínculo empregatício	De 3 a 6 salários mínimos (R$3.960 a R$7.920)	Não	Planaltina	SUS e Redes Particulares	Não	Não						Nenhuma condição		Muito improvável	Muito improvável	Provável	Muito provável	Muito provável	Provável	Muito provável	Muito provável	Muito provável	Provável	Muito Útil	Muito Útil	Provável	Provável	Provável	Concordo totalmente	Concordo totalmente	Discordo totalmente	Concordo totalmente	Discordo totalmente	Discordo totalmente	Discordo totalmente
114436388354	428177658	2023-10-13 16:20:38	2023-10-13 16:25:34	177.51.62.4					Aceito os termos acima e concordo em participar da pesquisa.	18-25	Feminino	Parda	Ensino Médio completo	Sim, com vínculo empregatício	De 1 a 3 salários mínimos (R$1.320 a R$3.960)	Não	Planaltina	SUS e Redes Particulares	Sim	Não			Depressão					Provável	Provável	Provável	Provável	Provável	Improvável	Provável	Provável	Provável	Muito improvável	Útil	Útil	Provável	Provável	Provável	Concordo parcialmente	Concordo parcialmente	Concordo parcialmente	Concordo parcialmente	Discordo parcialmente	Discordo parcialmente	Discordo totalmente
114436384288	428177658	2023-10-13 15:55:13	2023-10-13 16:20:10	177.51.62.4					Aceito os termos acima e concordo em participar da pesquisa.	36-40	Feminino	Parda	Ensino Médio completo	Sim, sem vínculo empregatício	Até 1 salário mínimo (R$ 1.320)	Não	Planaltina	SUS	Não	Não						Nenhuma condição		Provável	Provável	Provável	Provável	Provável	Provável	Muito provável	Muito provável	Muito improvável	Muito provável	Muito Útil	Muito Útil	Provável	Provável	Provável	Discordo totalmente	Concordo totalmente	Discordo totalmente	Concordo totalmente	Discordo parcialmente	Concordo totalmente	Discordo totalmente
114436364877	428177658	2023-10-13 15:40:43	2023-10-13 15:55:01	177.51.62.4					Aceito os termos acima e concordo em participar da pesquisa.	41-45	Masculino	Parda	Ensino Médio completo	Sim, com vínculo empregatício	De 1 a 3 salários mínimos (R$1.320 a R$3.960)	Não	Planaltina	SUS	Não	Não						Nenhuma condição		Provável	Provável	Provável	Provável	Provável	Provável	Provável	Improvável	Improvável	Improvável	Muito Útil	Muito Útil	Provável	Improvável	Provável	Concordo parcialmente	Discordo parcialmente	Concordo totalmente	Não concordo nem discordo	Discordo parcialmente	Discordo totalmente	Discordo totalmente
114436353657	428177658	2023-10-13 15:32:08	2023-10-13 15:40:28	177.51.62.4					Aceito os termos acima e concordo em participar da pesquisa.	36-40	Masculino	Branca	Ensino Médio completo	Sim, com vínculo empregatício	De 1 a 3 salários mínimos (R$1.320 a R$3.960)	Não	Planaltina	SUS	Não	Não						Nenhuma condição		Provável	Provável	Provável	Provável	Provável	Provável	Provável	Provável	Muito provável	Provável	Muito Útil	Inútil	Provável	Provável	Provável	Não concordo nem discordo	Não concordo nem discordo	Não concordo nem discordo	Não concordo nem discordo	Discordo totalmente	Discordo totalmente	Discordo totalmente
114436347466	428177658	2023-10-13 15:25:11	2023-10-13 15:31:57	177.51.62.4					Aceito os termos acima e concordo em participar da pesquisa.	31-35	Feminino	Preta	Fundamental incompleto	Sim, com vínculo empregatício	Até 1 salário mínimo (R$ 1.320)	Não	Planaltina	SUS	Não	Não						Nenhuma condição		Provável	Provável	Provável	Muito provável	Muito provável	Improvável	Muito improvável	Provável	Muito provável	Improvável	Muito Útil	Muito Útil	Muito provável	Muito provável	Muito provável	Não concordo nem discordo	Não concordo nem discordo	Não concordo nem discordo	Não concordo nem discordo	Discordo totalmente	Discordo totalmente	Concordo parcialmente
114436342614	428177658	2023-10-13 15:17:48	2023-10-13 15:24:56	177.51.62.4					Aceito os termos acima e concordo em participar da pesquisa.	26-30	Masculino	Parda	Superior Incompleto	Sim, com vínculo empregatício	De 1 a 3 salários mínimos (R$1.320 a R$3.960)	Não	Planaltina	SUS	Não	Sim						Nenhuma condição		Provável	Provável	Provável	Provável	Muito provável	Provável	Muito provável	Muito provável	Improvável	Improvável	Muito Útil	Muito Útil	Muito provável	Muito provável	Muito provável	Concordo totalmente	Concordo parcialmente	Concordo parcialmente	Concordo parcialmente	Concordo totalmente	Discordo totalmente	Discordo totalmente
114436329170	428177658	2023-10-13 14:57:26	2023-10-13 15:06:41	177.51.62.4					Aceito os termos acima e concordo em participar da pesquisa.	18-25	Feminino	Parda	Superior Completo	Sim, com vínculo empregatício	Até 1 salário mínimo (R$ 1.320)	Não	Planaltina	Redes Particulares	Sim	Não						Nenhuma condição		Provável	Provável	Provável	Muito provável	Provável	Provável	Provável	Provável	Provável	Improvável	Inútil	Inútil	Provável	Improvável	Improvável	Não concordo nem discordo	Não concordo nem discordo	Não concordo nem discordo	Não concordo nem discordo	Discordo totalmente	Discordo totalmente	Discordo totalmente
114436328434	428177658	2023-10-13 14:58:23	2023-10-13 15:05:38	191.56.50.67					Aceito os termos acima e concordo em participar da pesquisa.	31-35	Feminino	Parda	Superior Completo	Sim, com vínculo empregatício	Até 1 salário mínimo (R$ 1.320)	Não	Planaltina	SUS	Não	Não						Nenhuma condição		Provável	Provável	Provável	Provável	Muito provável	Provável	Muito provável	Improvável	Muito provável	Improvável	Útil	Inútil	Improvável	Improvável	Provável	Concordo totalmente	Concordo totalmente	Discordo parcialmente	Concordo totalmente	Discordo totalmente	Discordo totalmente	Discordo totalmente
114436321853	428177658	2023-10-13 14:46:06	2023-10-13 14:57:14	177.51.62.4					Aceito os termos acima e concordo em participar da pesquisa.	26-30	Feminino	Branca	Ensino Médio completo	Sim, sem vínculo empregatício	De 1 a 3 salários mínimos (R$1.320 a R$3.960)	Não	Planaltina	SUS e Redes Particulares	Sim	Não	Hipertensão/pressão alta							Provável	Provável	Provável	Muito provável	Muito provável	Improvável	Provável	Muito provável	Muito provável	Improvável	Muito Útil	Útil	Provável	Muito provável	Provável	Concordo parcialmente	Discordo parcialmente	Concordo totalmente	Concordo parcialmente	Discordo parcialmente	Discordo parcialmente	Discordo totalmente
114436321789	428177658	2023-10-13 14:39:07	2023-10-13 14:57:10	149.78.185.143					Aceito os termos acima e concordo em participar da pesquisa.	18-25	Feminino	Parda	Ensino Médio completo	Não	Até 1 salário mínimo (R$ 1.320)	Não	Planaltina	SUS	Não	Não						Nenhuma condição		Provável	Provável	Provável	Muito provável	Provável	Provável	Provável	Provável	Provável	Improvável	Útil	Útil	Provável	Provável	Improvável	Concordo totalmente	Concordo parcialmente	Concordo totalmente	Concordo parcialmente	Não concordo nem discordo	Discordo totalmente	Discordo totalmente
114436313750	428177658	2023-10-13 14:36:20	2023-10-13 14:45:55	177.51.61.25					Aceito os termos acima e concordo em participar da pesquisa.	18-25	Feminino	Parda	Ensino Médio completo	Não	Até 1 salário mínimo (R$ 1.320)	Não	Planaltina	SUS	Não	Não						Nenhuma condição		Improvável	Provável	Muito provável	Provável	Provável	Provável	Provável	Muito improvável	Muito provável	Muito improvável	Muito Útil	Inútil	Provável	Provável	Muito improvável	Concordo totalmente	Concordo totalmente	Não concordo nem discordo	Concordo totalmente	Discordo parcialmente	Discordo totalmente	Discordo totalmente
114436306133	428177658	2023-10-13 14:30:00	2023-10-13 14:35:58	177.51.62.4					Aceito os termos acima e concordo em participar da pesquisa.	18-25	Feminino	Branca	Ensino Médio completo	Sim, com vínculo empregatício	De 1 a 3 salários mínimos (R$1.320 a R$3.960)	Sim	Planaltina	SUS	Não	Não						Nenhuma condição		Provável	Muito provável	Provável	Provável	Provável	Provável	Muito provável	Provável	Provável	Provável	Muito Útil	Útil	Provável	Muito provável	Provável	Concordo totalmente	Concordo totalmente	Concordo parcialmente	Concordo totalmente	Discordo totalmente	Discordo totalmente	Discordo totalmente
114436301617	428177658	2023-10-13 14:18:40	2023-10-13 14:29:50	177.51.61.25					Aceito os termos acima e concordo em participar da pesquisa.	36-40	Feminino	Preta	Ensino Médio completo	Sim, com vínculo empregatício	De 1 a 3 salários mínimos (R$1.320 a R$3.960)	Não	Planaltina	SUS	Não	Não						Nenhuma condição		Muito improvável	Improvável	Muito provável	Muito improvável	Muito improvável	Muito provável	Muito provável	Provável	Muito provável	Provável	Útil	Inútil	Improvável	Improvável	Provável	Concordo parcialmente	Discordo totalmente	Discordo totalmente	Discordo parcialmente	Não concordo nem discordo	Discordo parcialmente	Discordo totalmente
114436300219	428177658	2023-10-13 14:19:48	2023-10-13 14:29:11	200.173.240.222					Aceito os termos acima e concordo em participar da pesquisa.	26-30	Feminino	Parda	Ensino Médio completo	Sim, com vínculo empregatício	De 1 a 3 salários mínimos (R$1.320 a R$3.960)	Não	Planaltina	SUS	Não	Não	Hipertensão/pressão alta					Nenhuma condição	Até agora não	Provável	Improvável	Provável	Provável	Improvável	Muito provável	Provável	Provável	Muito improvável	Provável	Útil	Útil	Improvável	Provável	Provável	Não concordo nem discordo	Concordo totalmente	Não concordo nem discordo	Discordo totalmente	Discordo totalmente	Discordo parcialmente	Concordo parcialmente
114436292383	428177658	2023-10-13 14:05:00	2023-10-13 14:17:54	177.51.62.4					Aceito os termos acima e concordo em participar da pesquisa.	26-30	Feminino	Parda	Ensino Médio completo	Sim, com vínculo empregatício	Até 1 salário mínimo (R$ 1.320)	Não	Planaltina	SUS	Não	Não						Nenhuma condição		Provável	Muito provável	Provável	Muito provável	Provável	Provável	Provável	Improvável	Provável	Improvável	Inútil	Útil	Provável	Muito provável	Improvável	Concordo parcialmente	Concordo parcialmente	Discordo parcialmente	Concordo parcialmente	Discordo parcialmente	Discordo parcialmente	Discordo totalmente
114436281643	428177658	2023-10-13 13:57:36	2023-10-13 14:04:47	177.51.62.4					Aceito os termos acima e concordo em participar da pesquisa.	18-25	Feminino	Parda	Superior Incompleto	Sim, sem vínculo empregatício	Até 1 salário mínimo (R$ 1.320)	Não	Planaltina	SUS	Não	Não						Nenhuma condição		Provável	Muito provável	Provável	Provável	Muito provável	Improvável	Provável	Provável	Improvável	Provável	Útil	Útil	Provável	Provável	Improvável	Concordo parcialmente	Concordo totalmente	Concordo totalmente	Concordo totalmente	Discordo parcialmente	Discordo parcialmente	Discordo totalmente
114436275368	428177658	2023-10-13 12:42:20	2023-10-13 13:57:12	177.51.62.4					Aceito os termos acima e concordo em participar da pesquisa.	41-45	Masculino	Branca	Ensino Médio completo	Sim, sem vínculo empregatício	De 3 a 6 salários mínimos (R$3.960 a R$7.920)	Sim	Planaltina	SUS	Não	Não						Nenhuma condição		Provável	Provável	Provável	Muito provável	Muito provável	Provável	Muito provável	Muito provável	Provável	Improvável	Muito Útil	Inútil	Provável	Muito provável	Improvável	Concordo parcialmente	Concordo totalmente	Concordo parcialmente	Concordo totalmente	Discordo parcialmente	Discordo totalmente	Discordo totalmente
114436210161	428177658	2023-10-13 12:28:56	2023-10-13 12:42:05	177.51.61.0					Aceito os termos acima e concordo em participar da pesquisa.	50+	Feminino	Parda	Fundamental incompleto	Não	De 1 a 3 salários mínimos (R$1.320 a R$3.960)	Não	Planaltina	SUS	Sim	Não	Hipertensão/pressão alta			Doenças cardiovasculares como infarto, derrame ou insuficiência cardíaca				Provável	Provável	Muito provável	Muito provável	Muito provável	Provável	Muito provável	Provável	Provável	Improvável	Muito Útil	Útil	Improvável	Muito provável	Provável	Concordo totalmente	Discordo parcialmente	Discordo totalmente	Concordo totalmente	Discordo parcialmente	Discordo totalmente	Discordo totalmente
114436198053	428177658	2023-10-13 12:11:26	2023-10-13 12:28:41	177.51.61.0					Aceito os termos acima e concordo em participar da pesquisa.	50+	Masculino	Parda	Fundamental completo	Não	De 1 a 3 salários mínimos (R$1.320 a R$3.960)	Sim	Riacho Fundo	SUS e Redes Particulares	Sim	Não	Hipertensão/pressão alta		Depressão				Pré diabético	Improvável	Muito provável	Provável	Provável	Provável	Provável	Provável	Provável	Improvável	Muito provável	Muito Útil	Inútil	Provável	Muito improvável	Muito improvável	Discordo parcialmente	Discordo parcialmente	Discordo totalmente	Discordo totalmente	Discordo parcialmente	Discordo totalmente	Discordo totalmente
114436182361	428177658	2023-10-13 12:03:19	2023-10-13 12:11:13	177.51.62.62					Aceito os termos acima e concordo em participar da pesquisa.	50+	Feminino	Parda	Ensino Médio Incompleto	Sim, com vínculo empregatício	De 1 a 3 salários mínimos (R$1.320 a R$3.960)	Não	Núcleo Bandeirante	SUS	Sim	Não	Hipertensão/pressão alta							Provável	Muito provável	Muito provável	Provável	Muito provável	Provável	Muito provável	Provável	Provável	Provável	Muito Útil	Útil	Provável	Provável	Provável	Concordo parcialmente	Discordo parcialmente	Concordo totalmente	Concordo totalmente	Discordo parcialmente	Discordo parcialmente	Discordo totalmente
114436174380	428177658	2023-10-13 11:49:26	2023-10-13 12:03:07	177.51.61.0					Aceito os termos acima e concordo em participar da pesquisa.	36-40	Masculino	Parda	Superior Completo	Sim, sem vínculo empregatício	De 1 a 3 salários mínimos (R$1.320 a R$3.960)	Sim	Planaltina	SUS e Redes Particulares	Não	Não						Nenhuma condição		Provável	Provável	Muito provável	Provável	Provável	Improvável	Provável	Provável	Improvável	Improvável	Muito Útil	Inútil	Provável	Provável	Improvável	Concordo totalmente	Concordo totalmente	Concordo parcialmente	Concordo parcialmente	Concordo parcialmente	Concordo parcialmente	Concordo parcialmente
114436161158	428177658	2023-10-13 11:34:54	2023-10-13 11:49:13	177.51.61.0					Aceito os termos acima e concordo em participar da pesquisa.	31-35	Feminino	Parda	Superior Completo	Não	Até 1 salário mínimo (R$ 1.320)	Sim	Planaltina	SUS	Não	Sim						Nenhuma condição		Provável	Provável	Muito provável	Provável	Muito provável	Provável	Provável	Muito provável	Muito provável	Muito provável	Muito Útil	Útil	Muito provável	Provável	Improvável	Concordo totalmente	Concordo totalmente	Concordo parcialmente	Concordo totalmente	Discordo totalmente	Discordo totalmente	Discordo totalmente
114436147123	428177658	2023-10-13 11:18:58	2023-10-13 11:34:43	177.51.61.0					Aceito os termos acima e concordo em participar da pesquisa.	26-50	Masculino	Branca	Superior Completo	Sim, com vínculo empregatício	Mais de 20 salários mínimos ( mais de R$26.400)	Não	Núcleo Bandeirante	Redes Particulares	Não	Não						Nenhuma condição		Muito improvável	Improvável	Improvável	Improvável	Improvável	Improvável	Improvável	Improvável	Muito improvável	Muito improvável	Inútil	Inútil	Muito improvável	Muito improvável	Muito improvável	Discordo totalmente	Não concordo nem discordo	Discordo totalmente	Discordo totalmente	Concordo totalmente	Concordo totalmente	Concordo totalmente
114436132682	428177658	2023-10-13 11:05:45	2023-10-13 11:18:47	177.51.61.0					Aceito os termos acima e concordo em participar da pesquisa.	18-25	Feminino	Parda	Ensino Médio Incompleto	Sim, com vínculo empregatício	De 1 a 3 salários mínimos (R$1.320 a R$3.960)	Não	São Sebastião	SUS	Não	Não						Nenhuma condição		Provável	Provável	Provável	Muito provável	Provável	Provável	Provável	Muito provável	Provável	Improvável	Útil	Muito Útil	Provável	Muito provável	Provável	Concordo parcialmente	Não concordo nem discordo	Concordo totalmente	Não concordo nem discordo	Discordo parcialmente	Concordo parcialmente	Concordo totalmente
114436119428	428177658	2023-10-13 10:54:19	2023-10-13 11:05:02	177.51.62.10					Aceito os termos acima e concordo em participar da pesquisa.	26-30	Feminino	Preta	Superior Completo	Sim, com vínculo empregatício	De 3 a 6 salários mínimos (R$3.960 a R$7.920)	Não	Riacho Fundo	SUS	Sim	Não			Depressão					Provável	Muito provável	Muito provável	Muito provável	Muito provável	Muito provável	Muito provável	Provável	Muito provável	Improvável	Muito Útil	Muito Útil	Muito provável	Provável	Provável	Concordo totalmente	Discordo parcialmente	Concordo parcialmente	Concordo totalmente	Discordo totalmente	Discordo totalmente	Discordo totalmente
114436109025	428177658	2023-10-13 10:43:49	2023-10-13 10:54:10	177.51.62.10					Aceito os termos acima e concordo em participar da pesquisa.	18-25	Masculino	Parda	Superior Completo	Sim, com vínculo empregatício	De 1 a 3 salários mínimos (R$1.320 a R$3.960)	Não	Samambaia	SUS e Redes Particulares	Não	Não						Nenhuma condição		Provável	Provável	Muito provável	Provável	Muito improvável	Provável	Muito provável	Muito provável	Provável	Improvável	Útil	Muito Útil	Provável	Improvável	Provável	Não concordo nem discordo	Concordo parcialmente	Concordo totalmente	Concordo parcialmente	Discordo parcialmente	Discordo parcialmente	Discordo totalmente
114436098958	428177658	2023-10-13 10:32:52	2023-10-13 10:43:33	177.51.62.20					Aceito os termos acima e concordo em participar da pesquisa.	36-40	Masculino	Branca	Fundamental completo	Sim, com vínculo empregatício	De 1 a 3 salários mínimos (R$1.320 a R$3.960)	Sim	Núcleo Bandeirante	SUS	Não	Não						Nenhuma condição		Improvável	Provável	Provável	Provável	Muito provável	Provável	Provável	Provável	Muito provável	Improvável	Muito Útil	Útil	Provável	Muito improvável	Muito improvável	Concordo parcialmente	Concordo parcialmente	Discordo parcialmente	Concordo parcialmente	Discordo totalmente	Discordo totalmente	Discordo totalmente
114436089222	428177658	2023-10-13 10:15:31	2023-10-13 10:32:31	177.51.62.20					Aceito os termos acima e concordo em participar da pesquisa.	50+	Feminino	Parda	Superior Completo	Não	Até 1 salário mínimo (R$ 1.320)	Sim	Estrutural/Scia	SUS e Redes Particulares	Sim	Não	Hipertensão/pressão alta		Depressão					Provável	Provável	Provável	Provável	Muito provável	Provável	Provável	Provável	Muito provável	Improvável	Muito Útil	Útil	Improvável	Muito provável	Provável	Discordo totalmente	Discordo parcialmente	Concordo parcialmente	Discordo parcialmente	Discordo parcialmente	Discordo totalmente	Discordo totalmente
114436072882	428177658	2023-10-13 10:02:31	2023-10-13 10:15:09	177.51.62.20					Aceito os termos acima e concordo em participar da pesquisa.	41-45	Feminino	Branca	Ensino Médio Incompleto	Não	Até 1 salário mínimo (R$ 1.320)	Não	Planaltina	SUS	Não	Não						Nenhuma condição		Improvável	Provável	Muito provável	Provável	Improvável	Provável	Provável	Muito improvável	Muito provável	Improvável	Muito Útil	Muito Útil	Improvável	Muito improvável	Provável	Concordo parcialmente	Discordo parcialmente	Concordo totalmente	Concordo totalmente	Concordo totalmente	Concordo parcialmente	Concordo totalmente
114436061534	428177658	2023-10-13 09:45:27	2023-10-13 10:02:11	177.51.62.20					Aceito os termos acima e concordo em participar da pesquisa.	26-30	Feminino	Preta	Ensino Médio completo	Sim, sem vínculo empregatício	De 1 a 3 salários mínimos (R$1.320 a R$3.960)	Sim	Riacho Fundo	SUS	Não	Não			Depressão					Provável	Provável	Provável	Muito provável	Provável	Provável	Provável	Provável	Muito provável	Improvável	Muito Útil	Inútil	Provável	Muito provável	Provável	Discordo parcialmente	Discordo parcialmente	Concordo totalmente	Concordo parcialmente	Discordo totalmente	Concordo parcialmente	Discordo totalmente
114436047645	428177658	2023-10-13 09:34:10	2023-10-13 09:45:16	177.51.62.20					Aceito os termos acima e concordo em participar da pesquisa.	50+	Masculino	Preta	Fundamental incompleto	Não	Até 1 salário mínimo (R$ 1.320)	Sim	Plano Piloto	SUS e Redes Particulares	Sim	Não	Hipertensão/pressão alta							Provável	Muito provável	Muito provável	Provável	Provável	Provável	Provável	Muito provável	Provável	Improvável	Muito Útil	Útil	Provável	Provável	Provável	Discordo parcialmente	Discordo parcialmente	Concordo parcialmente	Discordo parcialmente	Discordo totalmente	Discordo totalmente	Discordo totalmente
114436041598	428177658	2023-10-13 09:23:41	2023-10-13 09:37:24	24.152.12.2					Aceito os termos acima e concordo em participar da pesquisa.	50+	Masculino	Parda	Ensino Médio completo	Sim, com vínculo empregatício	De 1 a 3 salários mínimos (R$1.320 a R$3.960)	Não	Planaltina	Redes Particulares	Não	Não	Hipertensão/pressão alta							Provável	Muito provável	Provável	Muito provável	Provável	Improvável	Muito provável	Muito provável	Improvável	Improvável	Útil	Inútil	Provável	Provável	Provável	Concordo totalmente	Concordo totalmente	Concordo parcialmente	Concordo totalmente	Discordo parcialmente	Discordo totalmente	Não concordo nem discordo
114436038928	428177658	2023-10-13 09:23:10	2023-10-13 09:33:58	177.51.62.20					Aceito os termos acima e concordo em participar da pesquisa.	18-25	Masculino	Parda	Fundamental completo	Não	De 6 a 9 salários mínimos (R$7.920 a R$11.880)	Não	Santa Maria	SUS	Sim	Não	Hipertensão/pressão alta		Depressão					Improvável	Provável	Provável	Improvável	Provável	Muito improvável	Provável	Muito provável	Muito improvável	Muito provável	Inútil	Muito Útil	Improvável	Improvável	Provável	Concordo parcialmente	Concordo parcialmente	Não concordo nem discordo	Concordo totalmente	Discordo totalmente	Discordo totalmente	Discordo totalmente
114436034640	428177658	2023-10-13 09:24:39	2023-10-13 09:28:29	189.50.82.243					Aceito os termos acima e concordo em participar da pesquisa.	31-35	Masculino	Preta	Ensino Médio completo	Sim, com vínculo empregatício	De 1 a 3 salários mínimos (R$1.320 a R$3.960)	Não	Gama	SUS	Não	Não							Nem uma delas	Improvável	Provável	Muito improvável	Provável	Muito provável	Muito improvável	Improvável	Muito improvável	Muito provável	Muito improvável	Inútil	Muito Útil	Muito improvável	Muito improvável	Improvável	Concordo parcialmente	Não concordo nem discordo	Discordo parcialmente	Discordo totalmente	Não concordo nem discordo	Concordo parcialmente	Não concordo nem discordo
114436030323	428177658	2023-10-13 09:10:44	2023-10-13 09:22:38	177.51.61.0					Aceito os termos acima e concordo em participar da pesquisa.	26-50	Feminino	Branca	Ensino Médio completo	Sim, com vínculo empregatício	De 3 a 6 salários mínimos (R$3.960 a R$7.920)	Não	Riacho Fundo 2	SUS	Não	Não						Nenhuma condição		Provável	Provável	Provável	Provável	Muito provável	Improvável	Provável	Provável	Provável	Provável	Útil	Inútil	Improvável	Provável	Improvável	Concordo totalmente	Concordo parcialmente	Concordo totalmente	Concordo parcialmente	Concordo parcialmente	Discordo totalmente	Discordo totalmente
114434608282	428177658	2023-10-11 17:51:58	2023-10-11 17:59:02	177.50.71.79					Aceito os termos acima e concordo em participar da pesquisa.	18-25	Feminino	Parda	Superior Completo	Sim, sem vínculo empregatício	De 1 a 3 salários mínimos (R$1.320 a R$3.960)	Não	Planaltina	SUS e Redes Particulares	Sim	Não			Depressão					Provável	Muito provável	Muito provável	Muito provável	Provável	Provável	Muito provável	Muito provável	Provável	Improvável	Muito Útil	Inútil	Provável	Provável	Improvável	Concordo totalmente	Concordo parcialmente	Discordo parcialmente	Concordo totalmente	Discordo totalmente	Discordo totalmente	Discordo totalmente
114434602167	428177658	2023-10-11 17:39:23	2023-10-11 17:51:28	191.56.59.128					Aceito os termos acima e concordo em participar da pesquisa.	18-25	Masculino	Parda	Ensino Médio completo	Sim, com vínculo empregatício	De 1 a 3 salários mínimos (R$1.320 a R$3.960)	Não	Planaltina	SUS e Redes Particulares	Não	Não						Nenhuma condição		Provável	Provável	Muito provável	Provável	Muito provável	Provável	Provável	Muito provável	Provável	Provável	Útil	Inútil	Provável	Provável	Provável	Concordo totalmente	Concordo parcialmente	Concordo totalmente	Concordo parcialmente	Discordo totalmente	Discordo totalmente	Discordo totalmente
114434601430	428177658	2023-10-11 17:40:18	2023-10-11 17:50:55	177.50.72.65					Aceito os termos acima e concordo em participar da pesquisa.	26-30	Feminino	Preta	Não escolarizado	Sim, com vínculo empregatício	Até 1 salário mínimo (R$ 1.320)	Sim	Planaltina	SUS	Não	Não			Depressão					Muito provável	Muito provável	Muito provável	Improvável	Improvável	Provável	Provável	Muito provável	Muito provável	Muito provável	Muito Útil	Útil	Muito provável	Improvável	Improvável	Concordo totalmente	Concordo totalmente	Concordo totalmente	Concordo totalmente	Concordo totalmente	Concordo totalmente	Concordo totalmente
114434590491	428177658	2023-10-11 17:31:08	2023-10-11 17:38:24	177.50.71.79					Aceito os termos acima e concordo em participar da pesquisa.	26-30	Feminino	Parda	Superior Incompleto	Sim, com vínculo empregatício	Até 1 salário mínimo (R$ 1.320)	Não	Planaltina	SUS e Redes Particulares	Sim	Não			Depressão				Tdah	Provável	Provável	Provável	Muito provável	Muito provável	Provável	Muito provável	Improvável	Improvável	Provável	Útil	Inútil	Improvável	Improvável	Provável	Concordo totalmente	Concordo parcialmente	Concordo totalmente	Concordo totalmente	Discordo totalmente	Discordo totalmente	Discordo totalmente
114434583585	428177658	2023-10-11 17:18:19	2023-10-11 17:30:08	177.50.69.115					Aceito os termos acima e concordo em participar da pesquisa.	36-40	Feminino	Parda	Ensino Médio Incompleto	Sim, com vínculo empregatício	De 1 a 3 salários mínimos (R$1.320 a R$3.960)	Não	Planaltina	SUS e Redes Particulares	Não	Não	Hipertensão/pressão alta							Muito provável	Provável	Provável	Provável	Provável	Improvável	Provável	Provável	Provável	Muito improvável	Útil	Útil	Provável	Improvável	Improvável	Discordo parcialmente	Discordo totalmente	Concordo totalmente	Discordo parcialmente	Discordo parcialmente	Concordo totalmente	Concordo parcialmente
114434572609	428177658	2023-10-11 17:11:28	2023-10-11 17:17:47	177.50.73.60					Aceito os termos acima e concordo em participar da pesquisa.	26-30	Masculino	Preta	Superior Incompleto	Sim, com vínculo empregatício	Até 1 salário mínimo (R$ 1.320)	Sim	Planaltina	SUS	Não	Não						Nenhuma condição		Improvável	Muito improvável	Provável	Muito improvável	Muito improvável	Provável	Improvável	Muito improvável	Muito improvável	Muito improvável	Inútil	Inútil	Muito improvável	Muito improvável	Provável	Não concordo nem discordo	Concordo totalmente	Concordo parcialmente	Concordo parcialmente	Concordo parcialmente	Concordo parcialmente	Concordo parcialmente
114434566841	428177658	2023-10-11 17:01:14	2023-10-11 17:09:49	177.50.69.204					Aceito os termos acima e concordo em participar da pesquisa.	18-25	Feminino	Parda	Superior Incompleto	Não	Até 1 salário mínimo (R$ 1.320)	Não	Planaltina	SUS	Não	Não						Nenhuma condição		Provável	Provável	Provável	Muito provável	Provável	Provável	Provável	Provável	Improvável	Provável	Útil	Útil	Muito provável	Provável	Muito provável	Concordo totalmente	Concordo totalmente	Concordo totalmente	Concordo totalmente	Discordo parcialmente	Discordo totalmente	Discordo totalmente
114434558913	428177658	2023-10-11 16:53:49	2023-10-11 17:00:41	177.50.68.73					Aceito os termos acima e concordo em participar da pesquisa.	26-30	Feminino	Parda	Superior Completo	Sim, com vínculo empregatício	De 3 a 6 salários mínimos (R$3.960 a R$7.920)	Não	Planaltina	SUS e Redes Particulares	Sim	Não							Endometriose	Provável	Provável	Provável	Provável	Muito provável	Provável	Provável	Provável	Muito provável	Improvável	Muito Útil	Inútil	Provável	Muito provável	Provável	Concordo parcialmente	Concordo parcialmente	Discordo parcialmente	Concordo parcialmente	Discordo totalmente	Discordo totalmente	Discordo totalmente
114434552042	428177658	2023-10-11 16:31:43	2023-10-11 16:52:48	177.50.71.130					Aceito os termos acima e concordo em participar da pesquisa.	26-50	Feminino	Parda	Ensino Médio completo	Sim, com vínculo empregatício	De 1 a 3 salários mínimos (R$1.320 a R$3.960)	Não	Planaltina	SUS	Não	Não						Nenhuma condição		Provável	Provável	Provável	Provável	Muito provável	Provável	Muito provável	Muito provável	Muito provável	Provável	Muito Útil	Útil	Provável	Provável	Provável	Concordo parcialmente	Concordo totalmente	Concordo parcialmente	Concordo parcialmente	Discordo totalmente	Discordo totalmente	Discordo totalmente
114434532946	428177658	2023-10-11 16:22:56	2023-10-11 16:31:11	177.50.73.9					Aceito os termos acima e concordo em participar da pesquisa.	31-35	Feminino	Preta	Superior Completo	Sim, sem vínculo empregatício	De 3 a 6 salários mínimos (R$3.960 a R$7.920)	Não	Planaltina	SUS e Redes Particulares	Não	Não						Nenhuma condição		Provável	Muito provável	Improvável	Provável	Muito provável	Muito provável	Muito provável	Muito provável	Muito provável	Improvável	Muito Útil	Inútil	Provável	Provável	Provável	Concordo totalmente	Concordo totalmente	Discordo parcialmente	Concordo totalmente	Discordo totalmente	Discordo totalmente	Discordo totalmente
114434520583	428177658	2023-10-11 16:09:08	2023-10-11 16:16:36	177.50.68.109					Aceito os termos acima e concordo em participar da pesquisa.	26-30	Feminino	Parda	Superior Incompleto	Sim, sem vínculo empregatício	Até 1 salário mínimo (R$ 1.320)	Não	Planaltina	SUS	Não	Não						Nenhuma condição		Provável	Provável	Provável	Muito provável	Provável	Provável	Muito provável	Muito provável	Provável	Provável	Muito Inútil	Útil	Provável	Provável	Provável	Concordo totalmente	Concordo totalmente	Concordo parcialmente	Concordo parcialmente	Discordo parcialmente	Discordo parcialmente	Discordo totalmente
114434512967	428177658	2023-10-11 15:53:07	2023-10-11 16:07:41	177.50.71.130					Aceito os termos acima e concordo em participar da pesquisa.	36-40	Feminino	Preta	Fundamental completo	Sim, com vínculo empregatício	Até 1 salário mínimo (R$ 1.320)	Não	Planaltina	SUS	Sim	Não						Nenhuma condição		Muito provável	Muito provável	Muito provável	Provável	Muito provável	Muito provável	Muito provável	Muito provável	Muito provável	Provável	Muito Inútil	Útil	Provável	Improvável	Improvável	Concordo totalmente	Concordo totalmente	Concordo totalmente	Concordo parcialmente	Discordo totalmente	Discordo totalmente	Discordo totalmente
114434498765	428177658	2023-10-11 15:42:49	2023-10-11 15:52:34	177.50.71.130					Aceito os termos acima e concordo em participar da pesquisa.	18-25	Masculino	Branca	Ensino Médio completo	Sim, com vínculo empregatício	De 1 a 3 salários mínimos (R$1.320 a R$3.960)	Não	Riacho Fundo 2	SUS	Não	Não						Nenhuma condição		Muito improvável	Muito improvável	Muito improvável	Provável	Provável	Muito improvável	Improvável	Provável	Improvável	Improvável	Útil	Útil	Provável	Provável	Provável	Concordo totalmente	Concordo totalmente	Concordo totalmente	Concordo totalmente	Não concordo nem discordo	Discordo parcialmente	Discordo parcialmente
114434488959	428177658	2023-10-11 15:36:28	2023-10-11 15:42:07	177.50.73.9					Aceito os termos acima e concordo em participar da pesquisa.	18-25	Feminino	Parda	Ensino Médio completo	Sim, com vínculo empregatício	Até 1 salário mínimo (R$ 1.320)	Não	Planaltina	SUS	Não	Não						Nenhuma condição		Provável	Provável	Provável	Provável	Provável	Provável	Provável	Provável	Provável	Provável	Útil	Útil	Provável	Provável	Provável	Concordo totalmente	Concordo parcialmente	Concordo parcialmente	Concordo parcialmente	Concordo parcialmente	Concordo parcialmente	Não concordo nem discordo
114434481346	428177658	2023-10-11 15:22:31	2023-10-11 15:33:46	177.50.68.63					Aceito os termos acima e concordo em participar da pesquisa.	41-45	Feminino	Preta	Ensino Médio completo	Sim, com vínculo empregatício	De 1 a 3 salários mínimos (R$1.320 a R$3.960)	Não	Planaltina	SUS e Redes Particulares	Não	Não						Nenhuma condição		Provável	Provável	Provável	Muito provável	Muito provável	Provável	Provável	Muito provável	Provável	Provável	Útil	Muito Útil	Provável	Provável	Provável	Discordo parcialmente	Concordo totalmente	Discordo parcialmente	Concordo parcialmente	Discordo parcialmente	Discordo parcialmente	Discordo totalmente
114434470182	428177658	2023-10-11 15:12:45	2023-10-11 15:21:16	177.50.73.9					Aceito os termos acima e concordo em participar da pesquisa.	18-25	Feminino	Preta	Superior Incompleto	Sim, sem vínculo empregatício	De 1 a 3 salários mínimos (R$1.320 a R$3.960)	Não	Ceilândia	SUS e Redes Particulares	Não	Não						Nenhuma condição		Muito provável	Muito provável	Provável	Provável	Muito provável	Provável	Muito provável	Muito provável	Provável	Improvável	Muito Inútil	Útil	Provável	Provável	Muito improvável	Concordo parcialmente	Concordo parcialmente	Discordo totalmente	Concordo parcialmente	Discordo totalmente	Discordo totalmente	Discordo totalmente
114434460942	428177658	2023-10-11 15:00:25	2023-10-11 15:11:58	177.50.68.22					Aceito os termos acima e concordo em participar da pesquisa.	41-45	Feminino	Preta	Ensino Médio completo	Sim, sem vínculo empregatício	De 1 a 3 salários mínimos (R$1.320 a R$3.960)	Não	Planaltina	SUS	Não	Não						Nenhuma condição		Improvável	Improvável	Provável	Provável	Improvável	Improvável	Provável	Improvável	Provável	Improvável	Inútil	Inútil	Improvável	Provável	Provável	Discordo parcialmente	Discordo parcialmente	Discordo parcialmente	Discordo parcialmente	Concordo parcialmente	Concordo parcialmente	Concordo parcialmente
114434445684	428177658	2023-10-11 14:47:57	2023-10-11 14:56:47	177.50.67.125					Aceito os termos acima e concordo em participar da pesquisa.	18-25	Feminino	Preta	Superior Incompleto	Sim, sem vínculo empregatício	Até 1 salário mínimo (R$ 1.320)	Não	Sobradinho	SUS e Redes Particulares	Sim	Não						Nenhuma condição		Provável	Muito provável	Provável	Provável	Muito provável	Improvável	Muito provável	Provável	Muito provável	Muito improvável	Útil	Inútil	Provável	Provável	Provável	Concordo totalmente	Concordo parcialmente	Discordo parcialmente	Discordo parcialmente	Discordo totalmente	Discordo totalmente	Discordo totalmente
114434436733	428177658	2023-10-11 14:38:49	2023-10-11 14:47:27	177.50.66.33					Aceito os termos acima e concordo em participar da pesquisa.	26-30	Masculino	Preta	Superior Incompleto	Não	Até 1 salário mínimo (R$ 1.320)	Não	Planaltina	SUS	Não	Não						Nenhuma condição		Provável	Muito provável	Improvável	Muito improvável	Muito provável	Provável	Provável	Muito provável	Provável	Improvável	Muito Útil	Inútil	Muito improvável	Muito provável	Improvável	Não concordo nem discordo	Concordo parcialmente	Concordo totalmente	Concordo totalmente	Discordo totalmente	Discordo totalmente	Discordo totalmente
114434429462	428177658	2023-10-11 14:29:37	2023-10-11 14:39:29	177.50.69.80					Aceito os termos acima e concordo em participar da pesquisa.	18-25	Masculino	Branca	Fundamental completo	Não	Até 1 salário mínimo (R$ 1.320)	Não	Planaltina	SUS	Não	Sim						Nenhuma condição		Provável	Provável	Provável	Muito improvável	Provável	Provável	Provável	Provável	Improvável	Improvável	Muito Útil	Útil	Muito provável	Provável	Improvável	Discordo parcialmente	Concordo parcialmente	Concordo totalmente	Concordo parcialmente	Discordo totalmente	Discordo totalmente	Discordo totalmente
114434428531	428177658	2023-10-11 14:28:54	2023-10-11 14:38:24	177.50.73.9					Aceito os termos acima e concordo em participar da pesquisa.	26-30	Masculino	Parda	Ensino Médio completo	Sim, com vínculo empregatício	De 3 a 6 salários mínimos (R$3.960 a R$7.920)	Não	Planaltina	SUS	Não	Não						Nenhuma condição		Provável	Provável	Improvável	Provável	Improvável	Improvável	Provável	Provável	Improvável	Improvável	Útil	Útil	Provável	Provável	Provável	Discordo totalmente	Discordo totalmente	Discordo totalmente	Discordo totalmente	Concordo parcialmente	Concordo parcialmente	Concordo parcialmente
114434418262	428177658	2023-10-11 14:18:44	2023-10-11 14:28:17	177.50.68.53					Aceito os termos acima e concordo em participar da pesquisa.	18-25	Feminino	Branca	Superior Completo	Sim, com vínculo empregatício	Até 1 salário mínimo (R$ 1.320)	Não	Planaltina	SUS	Não	Não						Nenhuma condição		Provável	Provável	Provável	Provável	Provável	Provável	Muito provável	Provável	Provável	Provável	Muito Útil	Inútil	Provável	Provável	Improvável	Concordo totalmente	Concordo parcialmente	Concordo totalmente	Concordo parcialmente	Discordo totalmente	Discordo totalmente	Discordo totalmente
114434407493	428177658	2023-10-11 14:06:29	2023-10-11 14:17:51	177.50.73.9					Aceito os termos acima e concordo em participar da pesquisa.	26-50	Feminino	Parda	Superior Completo	Sim, sem vínculo empregatício	De 1 a 3 salários mínimos (R$1.320 a R$3.960)	Não	Planaltina	SUS e Redes Particulares	Não	Não	Hipertensão/pressão alta							Provável	Muito provável	Provável	Muito provável	Muito provável	Provável	Muito provável	Provável	Provável	Improvável	Muito Útil	Inútil	Muito provável	Provável	Improvável	Discordo totalmente	Concordo parcialmente	Discordo totalmente	Discordo parcialmente	Discordo parcialmente	Discordo totalmente	Discordo totalmente
114434395519	428177658	2023-10-11 13:51:20	2023-10-11 14:05:47	177.50.69.242					Aceito os termos acima e concordo em participar da pesquisa.	36-40	Masculino	Preta	Ensino Médio completo	Sim, com vínculo empregatício	De 1 a 3 salários mínimos (R$1.320 a R$3.960)	Sim	Planaltina	Redes Particulares	Não	Não						Nenhuma condição		Provável	Provável	Provável	Muito provável	Provável	Improvável	Muito provável	Muito provável	Provável	Improvável	Muito Útil	Útil	Provável	Provável	Improvável	Concordo parcialmente	Concordo totalmente	Concordo totalmente	Concordo totalmente	Discordo totalmente	Discordo totalmente	Discordo totalmente
114434391472	428177658	2023-10-11 13:51:34	2023-10-11 14:01:49	177.174.208.6					Aceito os termos acima e concordo em participar da pesquisa.	18-25	Feminino	Branca	Superior Completo	Não	Até 1 salário mínimo (R$ 1.320)	Não	Planaltina	SUS	Sim	Não						Nenhuma condição		Provável	Provável	Muito provável	Muito provável	Muito provável	Muito provável	Muito provável	Muito provável	Provável	Muito improvável	Muito Útil	Útil	Muito provável	Muito provável	Provável	Concordo totalmente	Concordo totalmente	Discordo totalmente	Concordo totalmente	Discordo totalmente	Discordo totalmente	Discordo totalmente
114434381948	428177658	2023-10-11 13:47:57	2023-10-11 13:52:23	187.43.186.135					Aceito os termos acima e concordo em participar da pesquisa.	18-25	Feminino	Branca	Superior Incompleto	Sim, com vínculo empregatício	De 1 a 3 salários mínimos (R$1.320 a R$3.960)	Não	Planaltina	SUS e Redes Particulares	Não	Não							Enxaqueca	Provável	Muito provável	Muito provável	Muito improvável	Muito improvável	Muito improvável	Muito improvável	Muito improvável	Muito improvável	Muito improvável	Muito Inútil	Muito Inútil	Muito improvável	Muito improvável	Muito improvável	Concordo totalmente	Concordo totalmente	Não concordo nem discordo	Discordo parcialmente	Discordo totalmente	Discordo totalmente	Discordo totalmente
114434379279	428177658	2023-10-11 13:41:08	2023-10-11 13:49:49	177.50.73.9					Aceito os termos acima e concordo em participar da pesquisa.	18-25	Feminino	Branca	Superior Incompleto	Não	Até 1 salário mínimo (R$ 1.320)	Não	Planaltina	SUS	Não	Não						Nenhuma condição		Provável	Muito provável	Improvável	Provável	Muito provável	Provável	Muito provável	Provável	Provável	Provável	Muito Útil	Inútil	Provável	Provável	Provável	Concordo parcialmente	Concordo totalmente	Concordo parcialmente	Concordo parcialmente	Não concordo nem discordo	Discordo totalmente	Discordo totalmente
114434299748	428177658	2023-10-11 12:20:12	2023-10-11 12:31:52	177.50.66.120					Aceito os termos acima e concordo em participar da pesquisa.	50+	Feminino	Branca	Ensino Médio Incompleto	Não	Até 1 salário mínimo (R$ 1.320)	Não	Núcleo Bandeirante	SUS e Redes Particulares	Sim	Não			Depressão					Provável	Muito provável	Provável	Muito provável	Muito provável	Provável	Muito provável	Muito provável	Provável	Improvável	Muito Útil	Útil	Provável	Muito provável	Provável	Concordo totalmente	Concordo totalmente	Discordo totalmente	Concordo totalmente	Discordo totalmente	Discordo totalmente	Discordo totalmente
114434286497	428177658	2023-10-11 12:07:54	2023-10-11 12:19:34	177.50.66.120					Aceito os termos acima e concordo em participar da pesquisa.	26-30	Feminino	Parda	Ensino Médio completo	Sim, com vínculo empregatício	De 1 a 3 salários mínimos (R$1.320 a R$3.960)	Não	Samambaia	SUS	Sim	Não			Depressão				Ansiedade	Provável	Muito provável	Provável	Provável	Muito provável	Provável	Muito provável	Provável	Provável	Improvável	Muito Útil	Útil	Provável	Improvável	Provável	Não concordo nem discordo	Discordo totalmente	Concordo totalmente	Concordo parcialmente	Discordo totalmente	Discordo totalmente	Discordo totalmente
114434271654	428177658	2023-10-11 11:55:17	2023-10-11 12:05:09	177.50.66.120					Aceito os termos acima e concordo em participar da pesquisa.	18-25	Feminino	Branca	Superior Incompleto	Não	Até 1 salário mínimo (R$ 1.320)	Não	Sobradinho	SUS	Não	Não						Nenhuma condição		Provável	Provável	Provável	Provável	Muito provável	Provável	Muito provável	Provável	Provável	Improvável	Muito Útil	Útil	Provável	Provável	Provável	Concordo totalmente	Concordo parcialmente	Discordo parcialmente	Concordo totalmente	Discordo totalmente	Discordo totalmente	Discordo totalmente
114434260816	428177658	2023-10-11 11:46:22	2023-10-11 11:54:42	177.50.66.120					Aceito os termos acima e concordo em participar da pesquisa.	18-25	Feminino	Parda	Superior Incompleto	Sim, sem vínculo empregatício	Até 1 salário mínimo (R$ 1.320)	Não	Núcleo Bandeirante	SUS e Redes Particulares	Não	Não						Nenhuma condição		Provável	Provável	Provável	Provável	Provável	Provável	Muito provável	Provável	Provável	Improvável	Muito Útil	Útil	Provável	Provável	Provável	Concordo parcialmente	Discordo parcialmente	Concordo parcialmente	Concordo parcialmente	Discordo parcialmente	Discordo totalmente	Discordo totalmente
114434252413	428177658	2023-10-11 11:33:52	2023-10-11 11:46:01	177.50.72.89					Aceito os termos acima e concordo em participar da pesquisa.	18-25	Feminino	Parda	Superior Incompleto	Sim, sem vínculo empregatício	Até 1 salário mínimo (R$ 1.320)	Não	Riacho Fundo 2	Redes Particulares	Não	Não							Ansiedade	Provável	Muito provável	Improvável	Provável	Provável	Provável	Muito provável	Provável	Provável	Provável	Muito Útil	Útil	Provável	Provável	Provável	Concordo parcialmente	Concordo parcialmente	Concordo parcialmente	Concordo parcialmente	Discordo parcialmente	Discordo totalmente	Discordo totalmente
114434240062	428177658	2023-10-11 11:16:01	2023-10-11 11:33:27	177.50.68.47					Aceito os termos acima e concordo em participar da pesquisa.	26-50	Feminino	Amarela	Ensino Médio completo	Sim, sem vínculo empregatício	De 1 a 3 salários mínimos (R$1.320 a R$3.960)	Sim	Planaltina	SUS	Não	Não						Nenhuma condição		Provável	Muito provável	Muito provável	Provável	Provável	Provável	Muito provável	Provável	Muito provável	Improvável	Muito Útil	Útil	Provável	Provável	Improvável	Concordo totalmente	Concordo totalmente	Discordo totalmente	Discordo totalmente	Discordo parcialmente	Concordo parcialmente	Discordo parcialmente
114434222309	428177658	2023-10-11 10:59:02	2023-10-11 11:15:28	177.50.68.47					Aceito os termos acima e concordo em participar da pesquisa.	18-25	Feminino	Parda	Superior Incompleto	Sim, sem vínculo empregatício	Até 1 salário mínimo (R$ 1.320)	Não	Planaltina	SUS e Redes Particulares	Não	Não						Nenhuma condição		Provável	Muito provável	Provável	Provável	Provável	Provável	Provável	Provável	Provável	Improvável	Útil	Inútil	Provável	Provável	Improvável	Concordo parcialmente	Concordo totalmente	Concordo totalmente	Concordo totalmente	Discordo parcialmente	Discordo totalmente	Concordo parcialmente
114434205084	428177658	2023-10-11 10:47:00	2023-10-11 10:58:33	177.50.70.43					Aceito os termos acima e concordo em participar da pesquisa.	18-25	Masculino	Branca	Superior Completo	Sim, com vínculo empregatício	De 1 a 3 salários mínimos (R$1.320 a R$3.960)	Não	Planaltina	SUS e Redes Particulares	Não	Não						Nenhuma condição		Provável	Muito provável	Provável	Provável	Provável	Provável	Provável	Provável	Provável	Provável	Muito Útil	Inútil	Provável	Provável	Improvável	Concordo totalmente	Concordo totalmente	Concordo parcialmente	Concordo totalmente	Discordo parcialmente	Discordo totalmente	Discordo totalmente
114434192894	428177658	2023-10-11 10:28:36	2023-10-11 10:46:25	177.50.68.47					Aceito os termos acima e concordo em participar da pesquisa.	50+	Masculino	Parda	Ensino Médio completo	Sim, com vínculo empregatício	De 1 a 3 salários mínimos (R$1.320 a R$3.960)	Não	Sobradinho	SUS e Redes Particulares	Sim	Sim	Hipertensão/pressão alta							Provável	Provável	Provável	Provável	Provável	Provável	Muito provável	Provável	Provável	Improvável	Útil	Útil	Provável	Provável	Improvável	Concordo parcialmente	Concordo totalmente	Concordo parcialmente	Concordo parcialmente	Discordo parcialmente	Discordo parcialmente	Concordo parcialmente
114434174153	428177658	2023-10-11 10:12:59	2023-10-11 10:27:00	177.50.70.43					Aceito os termos acima e concordo em participar da pesquisa.	50+	Masculino	Branca	Ensino Médio completo	Sim, sem vínculo empregatício	De 1 a 3 salários mínimos (R$1.320 a R$3.960)	Sim	Gama	SUS	Sim	Não							Laringite crônica	Provável	Muito provável	Muito provável	Muito provável	Muito provável	Provável	Muito provável	Muito provável	Muito provável	Muito provável	Muito Útil	Muito Útil	Provável	Provável	Provável	Discordo parcialmente	Discordo totalmente	Concordo parcialmente	Concordo totalmente	Concordo totalmente	Concordo totalmente	Discordo totalmente
114434160090	428177658	2023-10-11 09:56:34	2023-10-11 10:12:19	177.50.68.47					Aceito os termos acima e concordo em participar da pesquisa.	18-25	Masculino	Branca	Ensino Médio completo	Sim, sem vínculo empregatício	De 1 a 3 salários mínimos (R$1.320 a R$3.960)	Não	Ceilândia	SUS	Não	Não			Depressão					Muito provável	Muito provável	Provável	Provável	Muito provável	Improvável	Provável	Provável	Muito provável	Provável	Muito Útil	Útil	Provável	Provável	Provável	Concordo totalmente	Concordo parcialmente	Concordo totalmente	Concordo totalmente	Discordo parcialmente	Discordo totalmente	Discordo totalmente
114434143808	428177658	2023-10-11 09:29:44	2023-10-11 09:55:55	177.50.72.96					Aceito os termos acima e concordo em participar da pesquisa.	41-45	Feminino	Preta	Superior Incompleto	Sim, com vínculo empregatício	De 1 a 3 salários mínimos (R$1.320 a R$3.960)	Não	Planaltina	SUS e Redes Particulares	Não	Não						Nenhuma condição		Provável	Muito provável	Provável	Provável	Provável	Provável	Muito provável	Provável	Provável	Improvável	Muito Útil	Útil	Provável	Provável	Provável	Concordo parcialmente	Concordo parcialmente	Concordo parcialmente	Discordo parcialmente	Discordo totalmente	Discordo parcialmente	Discordo parcialmente
114432600758	428177658	2023-10-09 17:25:49	2023-10-09 17:50:40	189.40.77.21					Aceito os termos acima e concordo em participar da pesquisa.	50+	Masculino	Branca	Superior Completo	Não	Até 1 salário mínimo (R$ 1.320)	Não	Plano Piloto	SUS	Não	Não						Nenhuma condição		Provável	Provável	Improvável	Provável	Provável	Improvável	Provável	Improvável	Improvável	Improvável	Muito Útil	Útil	Provável	Provável	Provável	Concordo parcialmente	Concordo parcialmente	Concordo totalmente	Concordo totalmente	Discordo parcialmente	Discordo totalmente	Discordo parcialmente
114432579368	428177658	2023-10-09 16:51:34	2023-10-09 17:20:39	189.40.77.21					Aceito os termos acima e concordo em participar da pesquisa.	26-30	Masculino	Branca	Superior Completo	Não	De 1 a 3 salários mínimos (R$1.320 a R$3.960)	Não	Gama	SUS	Não	Não						Nenhuma condição		Improvável	Provável	Improvável	Provável	Provável	Provável	Provável	Improvável	Improvável	Improvável	Útil	Útil	Provável	Provável	Improvável	Concordo parcialmente	Concordo parcialmente	Discordo parcialmente	Concordo parcialmente	Discordo parcialmente	Discordo parcialmente	Discordo totalmente
114432579187	428177658	2023-10-09 17:02:01	2023-10-09 17:20:21	138.0.244.184					Aceito os termos acima e concordo em participar da pesquisa.	18-25	Feminino	Branca	Superior Incompleto	Não	De 3 a 6 salários mínimos (R$3.960 a R$7.920)	Não	Plano Piloto	SUS e Redes Particulares	Não	Não						Nenhuma condição		Improvável	Improvável	Provável	Improvável	Muito provável	Provável	Muito provável	Muito provável	Provável	Provável	Útil	Muito Inútil	Provável	Muito provável	Muito improvável	Não concordo nem discordo	Concordo parcialmente	Discordo parcialmente	Concordo parcialmente	Discordo parcialmente	Discordo totalmente	Não concordo nem discordo
114432558303	428177658	2023-10-09 16:47:09	2023-10-09 16:52:51	200.173.232.242					Aceito os termos acima e concordo em participar da pesquisa.	31-35	Feminino	Parda	Superior Completo	Sim, com vínculo empregatício	De 3 a 6 salários mínimos (R$3.960 a R$7.920)	Não	Plano Piloto	SUS e Redes Particulares	Não	Não						Nenhuma condição		Provável	Provável	Provável	Muito provável	Muito provável	Provável	Muito provável	Provável	Muito provável	Muito provável	Muito Útil	Útil	Provável	Muito provável	Improvável	Concordo totalmente	Concordo totalmente	Discordo parcialmente	Concordo totalmente	Discordo parcialmente	Discordo totalmente	Discordo totalmente
114432556881	428177658	2023-10-09 16:28:43	2023-10-09 16:50:59	189.40.77.21					Aceito os termos acima e concordo em participar da pesquisa.	50+	Feminino	Parda	Superior Completo	Não	De 3 a 6 salários mínimos (R$3.960 a R$7.920)	Não	Plano Piloto	SUS e Redes Particulares	Não	Não					Câncer, exceto de pele			Provável	Provável	Provável	Provável	Provável	Provável	Provável	Provável	Improvável	Provável	Muito Útil	Muito Útil	Provável	Provável	Provável	Concordo totalmente	Discordo parcialmente	Discordo parcialmente	Discordo parcialmente	Discordo totalmente	Discordo totalmente	Discordo totalmente
114432538059	428177658	2023-10-09 16:04:25	2023-10-09 16:27:52	189.40.77.21					Aceito os termos acima e concordo em participar da pesquisa.	50+	Masculino	Branca	Ensino Médio Incompleto	Sim, com vínculo empregatício	De 1 a 3 salários mínimos (R$1.320 a R$3.960)	Sim	Plano Piloto	SUS	Sim	Não	Hipertensão/pressão alta			Doenças cardiovasculares como infarto, derrame ou insuficiência cardíaca				Provável	Provável	Provável	Improvável	Muito provável	Muito provável	Provável	Provável	Muito improvável	Provável	Muito Útil	Muito Útil	Provável	Provável	Provável	Concordo parcialmente	Discordo parcialmente	Discordo parcialmente	Discordo parcialmente	Discordo parcialmente	Concordo parcialmente	Concordo totalmente
114432517084	428177658	2023-10-09 15:46:37	2023-10-09 16:01:15	189.40.77.21					Aceito os termos acima e concordo em participar da pesquisa.	31-35	Feminino	Branca	Superior Completo	Não	De 1 a 3 salários mínimos (R$1.320 a R$3.960)	Não	Plano Piloto	SUS e Redes Particulares	Não	Não			Depressão					Provável	Muito provável	Muito provável	Provável	Muito provável	Provável	Provável	Muito provável	Muito provável	Provável	Muito Útil	Inútil	Provável	Provável	Improvável	Concordo parcialmente	Discordo parcialmente	Concordo parcialmente	Discordo totalmente	Discordo totalmente	Discordo totalmente	Discordo totalmente
114432501442	428177658	2023-10-09 15:35:50	2023-10-09 15:43:47	189.40.77.21					Aceito os termos acima e concordo em participar da pesquisa.	18-25	Masculino	Branca	Superior Completo	Sim, sem vínculo empregatício	De 1 a 3 salários mínimos (R$1.320 a R$3.960)	Não	Riacho Fundo 2	SUS	Sim	Não						Nenhuma condição		Provável	Muito improvável	Muito improvável	Muito provável	Muito provável	Muito provável	Muito provável	Muito provável	Muito provável	Muito improvável	Muito Inútil	Muito Útil	Muito provável	Muito provável	Muito provável	Concordo totalmente	Concordo totalmente	Concordo totalmente	Concordo totalmente	Concordo totalmente	Discordo totalmente	Discordo totalmente
114432493228	428177658	2023-10-09 15:25:40	2023-10-09 15:35:19	189.40.77.21					Aceito os termos acima e concordo em participar da pesquisa.	26-30	Masculino	Preta	Superior Completo	Sim, sem vínculo empregatício	De 1 a 3 salários mínimos (R$1.320 a R$3.960)	Não	Sobradinho II	SUS	Sim	Não						Nenhuma condição		Provável	Provável	Provável	Muito provável	Muito provável	Provável	Provável	Muito provável	Provável	Muito provável	Muito Útil	Muito Útil	Provável	Provável	Improvável	Discordo parcialmente	Concordo parcialmente	Concordo parcialmente	Discordo totalmente	Discordo parcialmente	Discordo totalmente	Discordo totalmente
114432483220	428177658	2023-10-09 14:58:43	2023-10-09 15:25:06	189.40.77.21					Aceito os termos acima e concordo em participar da pesquisa.	18-25	Feminino	Parda	Superior Completo	Sim, sem vínculo empregatício	De 1 a 3 salários mínimos (R$1.320 a R$3.960)	Não	Riacho Fundo 2	SUS	Não	Não						Nenhuma condição		Muito provável	Muito provável	Provável	Provável	Provável	Improvável	Provável	Muito provável	Provável	Improvável	Muito Útil	Inútil	Provável	Muito provável	Improvável	Concordo parcialmente	Discordo parcialmente	Discordo parcialmente	Discordo totalmente	Discordo totalmente	Discordo totalmente	Discordo totalmente
114432448811	428177658	2023-10-09 14:46:38	2023-10-09 14:57:02	189.40.77.21					Aceito os termos acima e concordo em participar da pesquisa.	36-40	Feminino	Parda	Superior Completo	Sim, com vínculo empregatício	De 3 a 6 salários mínimos (R$3.960 a R$7.920)	Sim	Plano Piloto	SUS e Redes Particulares	Não	Não						Nenhuma condição		Muito provável	Muito provável	Provável	Muito provável	Provável	Provável	Muito provável	Provável	Provável	Improvável	Muito Útil	Útil	Provável	Provável	Improvável	Concordo totalmente	Concordo parcialmente	Concordo parcialmente	Concordo totalmente	Discordo totalmente	Discordo totalmente	Discordo totalmente
114432438435	428177658	2023-10-09 14:23:24	2023-10-09 14:46:23	189.40.77.21					Aceito os termos acima e concordo em participar da pesquisa.	26-50	Masculino	Preta	Ensino Médio completo	Sim, sem vínculo empregatício	De 1 a 3 salários mínimos (R$1.320 a R$3.960)	Não	Plano Piloto	SUS	Não	Não	Hipertensão/pressão alta							Muito improvável	Provável	Provável	Improvável	Provável	Provável	Provável	Muito improvável	Muito improvável	Muito improvável	Útil	Útil	Improvável	Improvável	Improvável	Discordo totalmente	Não concordo nem discordo	Não concordo nem discordo	Concordo parcialmente	Concordo parcialmente	Concordo parcialmente	Concordo parcialmente
114432423395	428177658	2023-10-09 14:20:02	2023-10-09 14:28:32	45.172.105.135					Aceito os termos acima e concordo em participar da pesquisa.	26-30	Feminino	Preta	Superior Completo	Sim, sem vínculo empregatício	De 10 a 20 salários mínimos (R$13.200 a R$26.400)	Sim	Plano Piloto	SUS e Redes Particulares	Sim	Não						Nenhuma condição		Provável	Provável	Provável	Improvável	Provável	Provável	Provável	Provável	Improvável	Provável	Útil	Útil	Provável	Provável	Provável	Concordo parcialmente	Concordo parcialmente	Concordo parcialmente	Concordo parcialmente	Discordo parcialmente	Discordo parcialmente	Discordo parcialmente
114432406218	428177658	2023-10-09 13:43:32	2023-10-09 14:08:35	189.40.77.21					Aceito os termos acima e concordo em participar da pesquisa.	26-50	Feminino	Parda	Fundamental completo	Sim, com vínculo empregatício	Até 1 salário mínimo (R$ 1.320)	Não	Gama	SUS e Redes Particulares	Não	Não		Diabetes						Improvável	Provável	Improvável	Provável	Provável	Improvável	Provável	Provável	Improvável	Muito improvável	Muito Útil	Útil	Provável	Provável	Provável	Concordo parcialmente	Discordo parcialmente	Concordo parcialmente	Concordo totalmente	Concordo parcialmente	Discordo parcialmente	Discordo parcialmente
114432384139	428177658	2023-10-09 13:25:37	2023-10-09 13:43:06	189.40.77.21					Aceito os termos acima e concordo em participar da pesquisa.	50+	Feminino	Parda	Fundamental completo	Não	Até 1 salário mínimo (R$ 1.320)	Não	Plano Piloto	SUS	Sim	Não	Hipertensão/pressão alta							Improvável	Provável	Improvável	Improvável	Provável	Muito provável	Provável	Provável	Provável	Improvável	Muito Útil	Muito Inútil	Improvável	Muito provável	Muito provável	Discordo totalmente	Concordo totalmente	Concordo totalmente	Discordo totalmente	Discordo totalmente	Discordo totalmente	Discordo totalmente
114432367403	428177658	2023-10-09 13:03:34	2023-10-09 13:24:30	189.40.77.21					Aceito os termos acima e concordo em participar da pesquisa.	50+	Feminino	Parda	Não escolarizado	Não	De 1 a 3 salários mínimos (R$1.320 a R$3.960)	Não	Plano Piloto	SUS	Sim	Não	Hipertensão/pressão alta					Nenhuma condição		Muito provável	Provável	Provável	Improvável	Muito provável	Provável	Provável	Muito provável	Provável	Improvável	Muito Útil	Muito Útil	Muito improvável	Muito provável	Provável	Concordo parcialmente	Discordo totalmente	Concordo parcialmente	Concordo totalmente	Concordo totalmente	Concordo totalmente	Discordo totalmente
114432326147	428177658	2023-10-09 12:08:50	2023-10-09 12:40:36	189.40.77.21					Aceito os termos acima e concordo em participar da pesquisa.	18-25	Feminino	Amarela	Ensino Médio Incompleto	Sim, com vínculo empregatício	Até 1 salário mínimo (R$ 1.320)	Não	Plano Piloto	SUS e Redes Particulares	Não	Não						Nenhuma condição		Provável	Muito provável	Provável	Provável	Muito improvável	Muito improvável	Muito provável	Muito provável	Improvável	Muito provável	Muito Útil	Muito Útil	Muito provável	Muito provável	Muito provável	Discordo parcialmente	Não concordo nem discordo	Concordo totalmente	Concordo totalmente	Discordo parcialmente	Discordo totalmente	Discordo totalmente
114432293998	428177658	2023-10-09 11:53:08	2023-10-09 12:08:26	189.40.77.21					Aceito os termos acima e concordo em participar da pesquisa.	31-35	Feminino	Parda	Superior Completo	Sim, com vínculo empregatício	De 10 a 20 salários mínimos (R$13.200 a R$26.400)	Não	Plano Piloto	SUS e Redes Particulares	Não	Não						Nenhuma condição		Improvável	Muito provável	Provável	Provável	Muito provável	Provável	Provável	Provável	Improvável	Provável	Muito Útil	Útil	Muito provável	Provável	Improvável	Discordo totalmente	Não concordo nem discordo	Concordo parcialmente	Concordo parcialmente	Discordo totalmente	Discordo totalmente	Discordo totalmente
114432278868	428177658	2023-10-09 11:36:37	2023-10-09 11:52:49	189.40.77.21					Aceito os termos acima e concordo em participar da pesquisa.	36-40	Masculino	Preta	Superior Completo	Sim, com vínculo empregatício	De 3 a 6 salários mínimos (R$3.960 a R$7.920)	Não	Plano Piloto	SUS	Não	Não						Nenhuma condição		Muito provável	Muito provável	Provável	Muito provável	Muito provável	Improvável	Muito provável	Provável	Improvável	Improvável	Muito Útil	Útil	Provável	Muito improvável	Muito improvável	Concordo parcialmente	Concordo parcialmente	Concordo totalmente	Concordo parcialmente	Discordo totalmente	Discordo totalmente	Discordo totalmente
114432263256	428177658	2023-10-09 11:21:39	2023-10-09 11:36:02	189.40.77.21					Aceito os termos acima e concordo em participar da pesquisa.	26-50	Feminino	Parda	Ensino Médio Incompleto	Não	Até 1 salário mínimo (R$ 1.320)	Não	Gama	SUS	Não	Não						Nenhuma condição		Muito provável	Provável	Provável	Provável	Provável	Provável	Provável	Muito provável	Provável	Provável	Útil	Muito Útil	Muito provável	Provável	Improvável	Discordo totalmente	Concordo totalmente	Concordo parcialmente	Concordo totalmente	Concordo totalmente	Concordo parcialmente	Discordo totalmente
114432248318	428177658	2023-10-09 10:53:00	2023-10-09 11:21:17	189.40.77.21					Aceito os termos acima e concordo em participar da pesquisa.	50+	Feminino	Branca	Superior Incompleto	Não	De 1 a 3 salários mínimos (R$1.320 a R$3.960)	Não	Plano Piloto	SUS e Redes Particulares	Sim	Não		Diabetes						Provável	Provável	Improvável	Provável	Provável	Muito improvável	Provável	Improvável	Provável	Improvável	Muito Útil	Inútil	Muito improvável	Provável	Provável	Concordo parcialmente	Discordo totalmente	Discordo parcialmente	Concordo totalmente	Não concordo nem discordo	Não concordo nem discordo	Concordo parcialmente
114432214307	428177658	2023-10-09 10:33:04	2023-10-09 10:46:36	189.40.77.21					Aceito os termos acima e concordo em participar da pesquisa.	18-25	Feminino	Parda	Ensino Médio completo	Sim, sem vínculo empregatício	De 6 a 9 salários mínimos (R$7.920 a R$11.880)	Não	Riacho Fundo 2	SUS e Redes Particulares	Sim	Não						Nenhuma condição		Improvável	Provável	Provável	Muito improvável	Muito improvável	Provável	Provável	Muito provável	Provável	Provável	Útil	Inútil	Provável	Provável	Provável	Concordo totalmente	Concordo totalmente	Concordo totalmente	Concordo totalmente	Concordo totalmente	Concordo totalmente	Discordo totalmente
114432201539	428177658	2023-10-09 10:14:31	2023-10-09 10:32:39	189.40.77.21					Aceito os termos acima e concordo em participar da pesquisa.	50+	Feminino	Parda	Fundamental incompleto	Não	Até 1 salário mínimo (R$ 1.320)	Sim	Plano Piloto	SUS e Redes Particulares	Sim	Sim	Hipertensão/pressão alta	Diabetes	Depressão					Muito provável	Muito provável	Muito provável	Muito provável	Muito provável	Muito provável	Provável	Muito improvável	Muito provável	Improvável	Muito Útil	Muito Útil	Improvável	Provável	Muito improvável	Discordo parcialmente	Discordo totalmente	Concordo parcialmente	Concordo parcialmente	Discordo totalmente	Discordo totalmente	Discordo totalmente
114432184375	428177658	2023-10-09 09:17:33	2023-10-09 10:12:46	189.40.77.21					Aceito os termos acima e concordo em participar da pesquisa.	26-30	Masculino	Preta	Superior Completo	Sim, com vínculo empregatício	De 3 a 6 salários mínimos (R$3.960 a R$7.920)	Sim	Taguatinga	SUS	Não	Não						Nenhuma condição		Improvável	Provável	Provável	Provável	Provável	Improvável	Provável	Improvável	Provável	Improvável	Útil	Inútil	Provável	Improvável	Improvável	Discordo parcialmente	Concordo parcialmente	Concordo parcialmente	Concordo parcialmente	Discordo totalmente	Discordo parcialmente	Discordo totalmente
114431782795	428177658	2023-10-08 16:32:08	2023-10-08 16:51:23	138.0.244.184					Aceito os termos acima e concordo em participar da pesquisa.	31-35	Feminino	Branca	Superior Completo	Sim, sem vínculo empregatício	Até 1 salário mínimo (R$ 1.320)	Não	Samambaia	SUS e Redes Particulares	Não	Não						Nenhuma condição		Improvável	Provável	Improvável	Provável	Provável	Provável	Muito provável	Provável	Improvável	Improvável	Muito Útil	Inútil	Improvável	Provável	Improvável	Concordo parcialmente	Concordo parcialmente	Não concordo nem discordo	Concordo totalmente	Discordo parcialmente	Discordo totalmente	Discordo totalmente
[truncated: 19 more columns]

## Sheet: data
idade	genero	raca	escolaridade	trabalha	renda	vive_so	residencia	SUS	medicamento	PCD	Hipertensão/pressão alta	x1	x2	x3	x4	x5	x6	x7	x8	x9	x10	x11	x12	x13	x14	x15	x16	x17	x18	x19	x20	x21	x22	x23	x24	x25	x26	x27	x28	x29	x30	x31	x32	x33	x34	x35	x36	x37	x38
18-25	Masculino	Branca	Superior Incompleto	Sim, com vínculo empregatício	De 1 a 3 salários mínimos (R$1.320 a R$3.960)	Não	Sudoeste/Octogonal	Redes Particulares	Não	Não	Não	2	3	1	3	3	3	3	4	2	2	4	2	3	3	4	2	4	4	5	2	2	4	2	4	2	5	5	2	5	2	4	4	5	1	4	3	2	3
41-45	Masculino	Branca	Superior Completo	Sim, com vínculo empregatício	De 6 a 9 salários mínimos (R$7.920 a R$11.880)	Não	Sudoeste/Octogonal	Redes Particulares	Não	Não	Não	3	4	3	3	3	3	4	4	3	2	4	3	3	4	3	4	5	1	5	5	5	3	2	5	2	5	5	5	3	4	4	3	3	4	3	0	3	3
26-50	Masculino	Branca	Superior Completo	Sim, com vínculo empregatício	De 3 a 6 salários mínimos (R$3.960 a R$7.920)	Não	Cruzeiro	SUS e Redes Particulares	Não	Não	Não	3	4	2	4	3	3	3	4	2	3	3	4	4	3	3	5	4	4	5	4	5	2	5	4	5	5	5	4	4	4	4	3	3	3	4	3	3	3
31-35	Masculino	Branca	Superior Completo	Sim, com vínculo empregatício	De 6 a 9 salários mínimos (R$7.920 a R$11.880)	Não	Cruzeiro	Redes Particulares	Não	Não	Não	3	3	3	4	4	3	3	3	3	2	4	3	2	3	3	4	4	2	4	5	5	5	4	5	4	5	5	5	4	4	5	5	3	5	5	3	2	2
31-35	Masculino	Preta	Superior Completo	Sim, com vínculo empregatício	De 6 a 9 salários mínimos (R$7.920 a R$11.880)	Não	Plano Piloto	Redes Particulares	Não	Não	Não	2	3	3	3	4	3	4	4	3	3	4	3	3	3	3	4	4	1	5	2	5	4	4	5	4	5	5	5	5	4	5	4	5	4	4	3	3	2
26-50	Masculino	Branca	Superior Completo	Sim, sem vínculo empregatício	De 6 a 9 salários mínimos (R$7.920 a R$11.880)	Não	Sudoeste/Octogonal	Redes Particulares	Não	Não	Não	3	4	2	3	4	3	4	3	3	3	3	3	3	2	2	5	4	4	5	5	5	5	4	4	4	5	5	5	2	4	5	2	5	2	2	3	3	3
41-45	Masculino	Preta	Superior Completo	Sim, com vínculo empregatício	De 3 a 6 salários mínimos (R$3.960 a R$7.920)	Não	Candangolândia	SUS e Redes Particulares	Não	Não	Não	3	3	2	3	3	3	4	3	3	3	3	3	4	3	3	5	4	4	4	5	5	5	4	5	5	5	5	5	4	4	5	2	5	4	4	3	3	3
31-35	Masculino	Parda	Superior Completo	Sim, sem vínculo empregatício	De 3 a 6 salários mínimos (R$3.960 a R$7.920)	Não	Sudoeste/Octogonal	SUS e Redes Particulares	Sim	Não	Diabetes	2	3	3	3	2	2	3	3	3	1	3	2	3	3	3	4	4	5	4	2	5	5	2	5	1	5	5	2	1	1	4	2	3	1	2	3	3	3
41-45	Masculino	Branca	Superior Completo	Sim, com vínculo empregatício	De 6 a 9 salários mínimos (R$7.920 a R$11.880)	Não	Sudoeste/Octogonal	SUS e Redes Particulares	Não	Não	Não	4	3	3	4	3	3	3	4	3	3	3	3	4	3	3	4	5	2	4	4	5	4	2	5	1	5	5	5	4	4	4	2	4	4	2	2	3	3
26-30	Masculino	Branca	Superior Completo	Sim, com vínculo empregatício	De 3 a 6 salários mínimos (R$3.960 a R$7.920)	Não	Sudoeste/Octogonal	Redes Particulares	Não	Não	Não	4	3	3	3	4	3	4	3	4	2	4	3	3	4	2	4	5	2	5	4	5	5	4	5	2	5	5	5	5	2	4	4	5	4	4	3	2	0
18-25	Masculino	Branca	Superior Incompleto	Não	Até 1 salário mínimo (R$ 1.320)	Não	Cruzeiro	Redes Particulares	Não	Não	Não	3	3	3	3	4	3	4	3	3	3	3	3	3	3	2	4	4	4	4	5	5	5	2	5	5	5	4	5	5	4	5	5	5	5	4	2	2	3
50+	Masculino	Parda	Ensino Médio completo	Não	De 3 a 6 salários mínimos (R$3.960 a R$7.920)	Não	Cruzeiro	SUS e Redes Particulares	Não	Não	Não	3	3	3	2	4	3	3	3	3	2	4	1	4	3	2	4	2	4	4	4	5	5	2	4	4	5	5	5	2	4	4	4	2	2	4	2	3	2
26-50	Masculino	Amarela	Superior Completo	Sim, com vínculo empregatício	De 6 a 9 salários mínimos (R$7.920 a R$11.880)	Não	Sudoeste/Octogonal	Redes Particulares	Não	Não	Não	3	3	2	3	3	3	4	4	4	3	4	2	4	4	3	4	4	2	4	5	5	4	2	4	2	5	5	5	5	2	4	3	4	4	4	3	2	3
26-30	Masculino	Branca	Superior Completo	Sim, com vínculo empregatício	De 3 a 6 salários mínimos (R$3.960 a R$7.920)	Não	Cruzeiro	Redes Particulares	Não	Não	Não	3	3	3	3	3	3	3	3	3	2	4	3	4	3	3	4	4	4	4	2	5	5	5	4	4	5	5	5	4	2	4	4	4	4	4	3	3	3
31-35	Masculino	Parda	Ensino Médio completo	Sim, sem vínculo empregatício	De 1 a 3 salários mínimos (R$1.320 a R$3.960)	Não	Sobradinho	SUS	Não	Não	Não	3	3	2	2	3	3	3	3	2	1	4	3	3	3	2	3	4	5	2	5	5	4	5	5	4	5	5	2	4	2	4	2	2	1	2	2	3	2
31-35	Masculino	Branca	Superior Completo	Sim, sem vínculo empregatício	De 1 a 3 salários mínimos (R$1.320 a R$3.960)	Não	Sudoeste/Octogonal	Redes Particulares	Não	Não	Não	3	3	2	4	4	3	4	4	4	1	4	2	4	4	4	5	5	4	5	5	5	5	5	5	5	5	5	5	3	4	4	4	5	5	4	4	3	3
50+	Masculino	Parda	Superior Completo	Não	De 3 a 6 salários mínimos (R$3.960 a R$7.920)	Não	Cruzeiro	Redes Particulares	Sim	Não	Doenças cardiovasculares	3	3	3	4	3	3	3	4	3	2	3	3	3	3	2	4	2	2	2	4	4	5	2	4	5	5	5	4	2	4	4	4	4	4	4	2	2	2
26-30	Masculino	Branca	Superior Completo	Sim, com vínculo empregatício	De 6 a 9 salários mínimos (R$7.920 a R$11.880)	Não	Sudoeste/Octogonal	Redes Particulares	Sim	Não	Hipertensão/pressão alta	2	3	2	4	3	3	3	3	4	2	4	3	3	4	3	4	5	1	4	5	5	5	4	5	4	5	5	5	4	1	4	4	5	5	4	4	3	4
50+	Masculino	Branca	Superior Completo	Sim, sem vínculo empregatício	Mais de 20 salários mínimos ( mais de R$26.400)	Não	Água Claras	Redes Particulares	Sim	Não	Não	2	3	2	3	3	3	3	3	3	3	4	3	4	3	3	5	4	4	5	4	4	5	4	5	2	5	5	5	4	4	4	4	4	4	4	3	3	2
41-45	Masculino	Parda	Superior Completo	Não	De 1 a 3 salários mínimos (R$1.320 a R$3.960)	Não	Taguatinga	SUS	Não	Não	Não	2	3	4	3	2	3	3	3	4	2	3	1	4	4	3	4	4	5	4	2	5	5	1	5	5	4	2	2	1	1	2	4	5	5	4	2	2	2
31-35	Masculino	Branca	Superior Completo	Sim, com vínculo empregatício	De 3 a 6 salários mínimos (R$3.960 a R$7.920)	Não	Água Claras	SUS e Redes Particulares	Não	Não	Não	2	3	3	3	4	3	4	3	4	2	4	2	4	4	3	5	4	4	5	4	5	5	3	5	4	5	5	4	4	5	5	4	5	5	5	4	3	3
41-45	Masculino	Branca	Superior Completo	Sim, com vínculo empregatício	De 3 a 6 salários mínimos (R$3.960 a R$7.920)	Não	Água Claras	Redes Particulares	Não	Não	Não	4	3	3	4	4	3	3	3	4	1	3	3	4	3	3	5	5	2	5	2	5	5	2	5	5	5	5	5	4	4	4	2	4	4	2	2	3	3
26-50	Masculino	Preta	Fundamental completo	Sim, com vínculo empregatício	De 1 a 3 salários mínimos (R$1.320 a R$3.960)	Não	Recanto Das Emas	SUS	Não	Não	Não	2	3	3	2	4	3	4	4	3	4	4	3	3	3	2	4	4	1	5	2	4	5	4	5	2	5	4	5	2	1	2	4	1	1	2	3	3	2
50+	Masculino	Branca	Superior Completo	Sim, com vínculo empregatício	De 6 a 9 salários mínimos (R$7.920 a R$11.880)	Não	Água Claras	Redes Particulares	Não	Não	Não	3	4	3	3	3	2	3	3	4	2	3	3	4	3	2	4	5	4	4	5	5	4	4	5	4	4	5	5	2	4	4	5	2	2	4	3	3	2
50+	Masculino	Branca	Superior Completo	Sim, sem vínculo empregatício	De 10 a 20 salários mínimos (R$13.200 a R$26.400)	Não	Arniqueira	Redes Particulares	Não	Não	Não	3	3	4	2	3	3	3	4	4	3	3	3	4	3	2	4	2	2	4	5	4	5	2	4	4	5	4	2	2	1	4	4	1	2	2	2	2	3
31-35	Masculino	Parda	Ensino Médio completo	Sim, sem vínculo empregatício	De 1 a 3 salários mínimos (R$1.320 a R$3.960)	Não	Taguatinga	SUS	Não	Não	Não	3	4	3	3	3	1	2	3	3	3	3	3	3	3	3	2	4	1	5	5	5	5	2	5	4	5	5	5	2	2	4	4	1	4	2	2	3	3
18-25	Masculino	Parda	Superior Incompleto	Sim, com vínculo empregatício	De 1 a 3 salários mínimos (R$1.320 a R$3.960)	Não	Guará	SUS e Redes Particulares	Não	Não	Não	3	3	3	2	4	3	3	3	3	2	4	1	4	3	2	4	1	4	4	4	5	2	2	2	4	5	5	5	2	4	4	2	4	2	4	2	3	3
31-35	Masculino	Parda	Superior Completo	Sim, com vínculo empregatício	De 6 a 9 salários mínimos (R$7.920 a R$11.880)	Sim	Água Claras	Redes Particulares	Não	Não	Não	3	3	2	3	3	3	4	3	3	2	3	3	4	4	4	1	4	4	4	4	2	5	2	5	4	5	5	5	4	4	4	4	5	4	4	3	4	3
41-45	Masculino	Branca	Superior Completo	Sim, sem vínculo empregatício	De 6 a 9 salários mínimos (R$7.920 a R$11.880)	Não	Jardim Botânico	Redes Particulares	Não	Não	Não	3	3	3	3	3	3	4	2	4	3	4	3	4	4	2	2	4	4	1	2	5	4	2	5	5	5	5	5	4	2	4	4	4	4	4	3	2	3
36-40	Masculino	Branca	Superior Completo	Sim, com vínculo empregatício	De 3 a 6 salários mínimos (R$3.960 a R$7.920)	Não	Taguatinga	Redes Particulares	Sim	Não	Hipertensão/pressão alta	3	3	4	3	4	3	4	4	3	3	3	4	3	4	2	4	4	2	4	5	5	2	2	5	5	5	5	5	4	4	5	4	4	2	4	2	2	2
36-40	Masculino	Branca	Superior Completo	Sim, com vínculo empregatício	De 3 a 6 salários mínimos (R$3.960 a R$7.920)	Sim	Água Claras	Redes Particulares	Não	Não	Não	2	3	2	3	3	3	4	3	4	3	4	3	3	4	3	5	5	1	2	2	4	5	4	4	5	5	5	5	4	4	4	2	2	4	2	3	3	2
31-35	Masculino	Parda	Ensino Médio completo	Sim, com vínculo empregatício	De 1 a 3 salários mínimos (R$1.320 a R$3.960)	Não	Planaltina	SUS	Não	Não	Não	3	4	3	3	4	2	4	4	3	3	3	2	4	3	2	2	4	4	4	2	5	5	3	4	2	5	5	4	4	2	4	3	2	2	4	3	0	3
50+	Masculino	Branca	Ensino Médio completo	Não	De 6 a 9 salários mínimos (R$7.920 a R$11.880)	Não	Água Claras	Redes Particulares	Não	Não	Não	3	4	2	4	3	1	3	3	2	3	4	3	4	3	3	5	4	4	5	4	5	2	4	5	5	5	5	5	2	2	4	4	2	1	4	3	3	3
41-45	Masculino	Branca	Superior Completo	Sim, com vínculo empregatício	De 6 a 9 salários mínimos (R$7.920 a R$11.880)	Não	Arniqueira	Redes Particulares	Não	Não	Não	3	4	2	2	3	3	3	4	3	2	2	2	3	2	3	5	2	5	5	4	5	5	4	5	4	5	5	2	2	2	5	2	2	1	4	2	2	3
18-25	Masculino	Branca	Ensino Médio completo	Não	Até 1 salário mínimo (R$ 1.320)	Não	Água Claras	Redes Particulares	Não	Não	Depressão	3	3	3	3	4	3	4	4	3	1	3	3	3	4	2	4	4	4	5	5	5	4	5	5	4	5	5	4	3	5	5	5	4	5	5	2	2	3
31-35	Masculino	Preta	Superior Incompleto	Sim, sem vínculo empregatício	De 1 a 3 salários mínimos (R$1.320 a R$3.960)	Não	Ceilândia	SUS	Não	Não	Não	4	4	4	3	3	4	3	3	3	2	4	3	3	4	3	5	2	5	4	2	5	4	4	5	5	5	5	5	2	4	4	2	4	2	4	3	2	2
26-30	Masculino	Preta	Superior Completo	Sim, com vínculo empregatício	De 6 a 9 salários mínimos (R$7.920 a R$11.880)	Sim	Água Claras	SUS e Redes Particulares	Não	Não	Não	2	3	3	3	3	2	3	3	4	3	3	3	3	4	3	4	4	2	4	2	4	5	4	5	4	5	5	5	3	4	4	5	5	4	4	3	3	2
18-25	Masculino	Branca	Superior Incompleto	Sim, sem vínculo empregatício	De 1 a 3 salários mínimos (R$1.320 a R$3.960)	Não	Água Claras	SUS e Redes Particulares	Não	Não	Não	3	4	2	3	4	3	4	4	3	3	4	2	3	2	1	4	2	4	1	4	2	5	2	5	2	5	5	5	2	2	4	4	4	4	4	3	3	3
26-30	Masculino	Preta	Ensino Médio completo	Sim, sem vínculo empregatício	De 1 a 3 salários mínimos (R$1.320 a R$3.960)	Sim	Samambaia	SUS	Não	Não	Ansiedade	3	3	3	3	4	3	3	3	4	2	4	3	3	4	3	2	5	2	2	4	5	5	4	5	2	5	5	5	5	2	4	4	5	4	4	3	2	3
18-25	Masculino	Branca	Ensino Médio completo	Sim, com vínculo empregatício	De 1 a 3 salários mínimos (R$1.320 a R$3.960)	Não	Ceilândia	SUS e Redes Particulares	Sim	Não	Não	3	3	3	3	4	2	4	4	2	2	3	4	3	4	3	2	4	4	1	5	4	4	4	5	2	5	5	5	4	4	5	2	5	2	4	2	3	4
18-25	Masculino	Parda	Ensino Médio completo	Não	Até 1 salário mínimo (R$ 1.320)	Não	Taguatinga	SUS e Redes Particulares	Não	Não	Não	3	3	2	3	4	3	4	3	3	3	3	3	3	4	4	4	4	2	5	5	5	5	2	5	5	5	5	5	4	4	1	3	4	5	5	2	2	4
36-40	Masculino	Branca	Superior Completo	Sim, com vínculo empregatício	De 3 a 6 salários mínimos (R$3.960 a R$7.920)	Sim	Água Claras	Redes Particulares	Não	Não	Não	3	3	3	4	3	2	4	4	4	2	4	4	3	4	4	4	5	2	5	4	5	5	2	5	5	5	5	4	4	1	4	2	2	2	2	3	2	2
50+	Masculino	Branca	Superior Completo	Não	De 3 a 6 salários mínimos (R$3.960 a R$7.920)	Não	Água Claras	Redes Particulares	Sim	Não	Hipertensão/pressão alta	3	3	3	4	3	3	3	4	3	2	3	3	4	4	3	5	4	4	5	5	5	5	4	5	4	5	5	4	2	2	4	3	3	2	4	2	3	2
31-35	Masculino	Parda	Superior Completo	Sim, com vínculo empregatício	De 6 a 9 salários mínimos (R$7.920 a R$11.880)	Sim	Água Claras	SUS e Redes Particulares	Não	Não	Não	2	3	3	3	3	4	3	3	4	2	4	2	3	3	3	5	5	2	5	2	5	5	4	5	2	5	5	5	2	4	5	4	5	5	4	2	3	3
50+	Masculino	Parda	Ensino Médio completo	Não	De 6 a 9 salários mínimos (R$7.920 a R$11.880)	Não	Água Claras	Redes Particulares	Não	Não	Não	3	3	4	3	3	3	2	3	4	2	4	2	3	3	2	2	4	2	4	4	4	4	2	4	5	5	5	4	2	1	4	2	2	1	2	1	3	3
18-25	Masculino	Branca	Superior Incompleto	Não	Até 1 salário mínimo (R$ 1.320)	Não	Arniqueira	Redes Particulares	Não	Não	Não	3	3	3	3	3	4	3	3	4	3	3	2	3	3	2	2	4	4	4	4	5	4	2	2	5	2	5	5	4	4	4	4	4	4	4	1	2	4
31-35	Feminino	Branca	Superior Completo	Sim, com vínculo empregatício	De 6 a 9 salários mínimos (R$7.920 a R$11.880)	Sim	Água Claras	Redes Particulares	Sim	Não	Não	3	4	3	2	3	3	3	2	2	3	3	3	3	3	3	4	2	4	4	2	5	5	2	4	2	5	5	4	4	4	4	4	3	3	4	3	2	3
26-30	Feminino	Branca	Superior Completo	Sim, com vínculo empregatício	De 1 a 3 salários mínimos (R$1.320 a R$3.960)	Não	Recanto Das Emas	SUS	Não	Não	Não	3	3	3	2	3	3	3	4	2	2	3	3	3	3	3	4	4	1	5	2	2	4	2	4	4	5	5	4	2	1	2	3	2	1	2	3	2	3
50+	Masculino	Branca	Superior Completo	Não	De 6 a 9 salários mínimos (R$7.920 a R$11.880)	Não	Samambaia	SUS e Redes Particulares	Sim	Não	Hipertensão/pressão alta	2	3	3	3	3	2	4	4	3	1	3	2	3	4	2	5	4	4	4	4	2	5	4	4	4	5	5	5	4	4	4	4	2	1	5	3	3	3
36-40	Masculino	Branca	Ensino Médio completo	Sim, com vínculo empregatício	De 3 a 6 salários mínimos (R$3.960 a R$7.920)	Não	Taguatinga	SUS e Redes Particulares	Não	Não	Não	3	3	3	4	4	2	3	4	4	4	3	3	3	3	3	4	4	2	4	4	4	4	1	2	5	4	5	5	2	2	4	5	4	5	4	4	3	3
36-40	Masculino	Branca	Superior Completo	Sim, com vínculo empregatício	De 10 a 20 salários mínimos (R$13.200 a R$26.400)	Não	Água Claras	Redes Particulares	Não	Não	Não	3	4	3	2	2	3	4	2	4	2	3	3	4	3	4	4	5	4	5	2	5	4	5	5	5	5	5	4	3	2	2	2	1	2	2	3	3	2
26-50	Masculino	Parda	Ensino Médio completo	Sim, sem vínculo empregatício	De 6 a 9 salários mínimos (R$7.920 a R$11.880)	Não	Arniqueira	Redes Particulares	Sim	Não	Não	4	3	4	3	3	3	4	3	4	2	4	3	3	3	3	5	4	5	4	5	5	5	5	5	4	5	5	5	4	4	5	4	4	5	5	2	1	2
31-35	Masculino	Parda	Superior Incompleto	Sim, com vínculo empregatício	De 1 a 3 salários mínimos (R$1.320 a R$3.960)	Não	Ceilândia	SUS	Não	Não	Não	3	3	2	3	3	3	4	3	3	3	4	3	3	3	3	4	4	2	4	4	2	5	2	2	2	5	5	4	2	1	4	3	3	3	4	2	2	3
31-35	Feminino	Parda	Superior Completo	Sim, sem vínculo empregatício	De 3 a 6 salários mínimos (R$3.960 a R$7.920)	Sim	Água Claras	Redes Particulares	Não	Não	Não	2	3	2	3	3	2	4	3	3	2	4	2	4	4	4	5	4	2	5	4	5	4	4	5	4	5	5	5	3	2	4	4	5	4	4	3	2	4
26-50	Masculino	Branca	Superior Completo	Sim, com vínculo empregatício	De 10 a 20 salários mínimos (R$13.200 a R$26.400)	Não	Água Claras	Redes Particulares	Não	Não	Não	2	3	2	3	4	2	3	3	2	3	4	2	4	3	3	5	2	2	5	2	5	4	4	5	4	5	5	5	2	1	4	2	1	2	2	2	3	2
26-30	Masculino	Branca	Superior Completo	Não	De 1 a 3 salários mínimos (R$1.320 a R$3.960)	Não	Água Claras	Redes Particulares	Não	Não	Depressão	4	4	4	3	3	4	4	3	4	2	4	3	3	3	4	4	5	2	4	5	5	4	4	4	5	5	4	4	5	4	5	5	4	4	4	2	2	3
31-35	Masculino	Branca	Superior Completo	Sim, com vínculo empregatício	De 6 a 9 salários mínimos (R$7.920 a R$11.880)	Não	Park Way	Redes Particulares	Não	Não	Não	3	4	3	3	4	3	4	3	4	3	3	4	3	4	3	2	4	1	4	5	5	3	4	5	4	5	5	5	4	4	5	5	5	4	4	0	2	2
26-30	Masculino	Preta	Superior Completo	Sim, sem vínculo empregatício	De 3 a 6 salários mínimos (R$3.960 a R$7.920)	Não	Samambaia	Redes Particulares	Não	Não	Não	3	3	3	4	4	3	4	3	4	2	4	3	4	3	2	4	5	2	4	4	5	5	2	5	5	5	5	4	2	1	2	2	1	1	2	3	2	3
26-50	Feminino	Branca	Ensino Médio completo	Sim, com vínculo empregatício	De 3 a 6 salários mínimos (R$3.960 a R$7.920)	Não	Taguatinga	Redes Particulares	Sim	Não	Hipertensão/pressão alta	3	3	3	2	3	3	3	4	4	2	3	3	3	3	2	2	4	5	4	4	5	5	4	5	5	5	5	5	4	2	5	4	5	4	4	2	2	3
18-25	Masculino	Parda	Superior Incompleto	Sim, sem vínculo empregatício	De 1 a 3 salários mínimos (R$1.320 a R$3.960)	Não	Água Claras	Redes Particulares	Não	Não	Não	3	3	2	4	3	3	4	3	3	3	3	4	3	4	3	4	5	4	4	4	5	5	4	5	4	5	4	5	5	5	5	2	4	2	4	2	2	3
26-50	Masculino	Branca	Superior Completo	Sim, com vínculo empregatício	De 6 a 9 salários mínimos (R$7.920 a R$11.880)	Não	Arniqueira	Redes Particulares	Não	Não	Não	3	3	1	2	3	3	3	4	2	2	3	3	3	4	3	4	4	4	5	2	5	4	2	4	5	5	5	5	5	1	2	2	5	1	2	3	2	2
50+	Masculino	Branca	Superior Completo	Sim, sem vínculo empregatício	Mais de 20 salários mínimos ( mais de R$26.400)	Não	Park Way	Redes Particulares	Não	Não	Não	1	3	3	2	3	2	4	2	2	1	3	3	2	2	3	5	4	5	5	5	4	2	5	5	5	5	5	5	2	3	4	4	4	4	4	3	2	3
31-35	Masculino	Branca	Superior Completo	Sim, com vínculo empregatício	De 6 a 9 salários mínimos (R$7.920 a R$11.880)	Sim	Taguatinga	SUS e Redes Particulares	Não	Não	Não	2	3	3	3	3	3	4	2	3	2	3	3	2	3	3	4	4	2	2	5	5	5	3	5	4	5	5	4	4	2	2	1	1	1	2	3	3	3
50+	Masculino	Branca	Superior Completo	Não	De 6 a 9 salários mínimos (R$7.920 a R$11.880)	Não	Água Claras	Redes Particulares	Sim	Não	Hipertensão/pressão alta	3	4	3	2	3	3	4	4	4	3	4	3	3	4	3	5	4	2	5	4	5	4	2	5	4	5	5	5	2	2	3	3	2	3	2	4	3	3
26-30	Feminino	Branca	Superior Completo	Sim, sem vínculo empregatício	De 3 a 6 salários mínimos (R$3.960 a R$7.920)	Não	Taguatinga	SUS e Redes Particulares	Não	Não	Ansiedade	3	3	3	4	4	3	3	3	3	3	4	2	4	4	4	5	5	4	5	5	5	5	5	5	5	5	5	5	5	5	5	5	5	5	5	4	4	4
26-30	Prefiro não declarar	Branca	Superior Completo	Sim, sem vínculo empregatício	De 1 a 3 salários mínimos (R$1.320 a R$3.960)	Não	Taguatinga	SUS e Redes Particulares	Não	Não	Não	2	2	1	3	3	3	4	3	2	2	4	1	1	3	4	4	2	2	5	3	5	5	4	5	3	5	5	5	4	4	4	4	4	2	4	4	3	3
18-25	Feminino	Branca	Superior Incompleto	Não	Até 1 salário mínimo (R$ 1.320)	Não	Arniqueira	Redes Particulares	Não	Não	Não	3	3	2	2	4	4	2	2	2	1	3	4	3	4	3	4	5	4	5	1	4	4	1	2	3	4	2	3	2	1	4	3	2	2	4	3	4	0
36-40	Masculino	Preta	Ensino Médio completo	Sim, com vínculo empregatício	De 1 a 3 salários mínimos (R$1.320 a R$3.960)	Não	Vicente Pires	SUS	Não	Não	Não	3	3	3	3	3	3	3	4	2	3	3	4	3	3	2	2	2	4	2	2	2	3	2	2	4	4	5	2	1	2	4	1	1	1	1	2	1	2
26-50	Masculino	Parda	Ensino Médio completo	Sim, sem vínculo empregatício	De 3 a 6 salários mínimos (R$3.960 a R$7.920)	Não	Água Claras	Redes Particulares	Sim	Não	Hipertensão/pressão alta	3	3	2	2	3	2	3	2	3	3	4	3	3	4	3	4	4	2	3	4	5	4	2	5	5	4	5	4	2	2	4	4	2	2	2	3	2	2
36-40	Feminino	Branca	Superior Completo	Sim, com vínculo empregatício	De 3 a 6 salários mínimos (R$3.960 a R$7.920)	Não	Park Way	Redes Particulares	Não	Não	Não	3	3	3	3	3	3	3	3	3	3	3	2	3	3	3	4	4	5	4	5	5	5	4	4	4	5	5	5	3	2	4	3	4	3	4	3	3	3
41-45	Feminino	Branca	Superior Completo	Sim, com vínculo empregatício	De 3 a 6 salários mínimos (R$3.960 a R$7.920)	Não	Taguatinga	Redes Particulares	Não	Não	Não	3	3	3	4	4	3	4	4	4	3	4	2	4	4	4	5	5	2	5	5	5	5	4	5	4	4	5	5	3	5	5	4	4	5	4	4	3	3
36-40	Feminino	Parda	Ensino Médio completo	Sim, com vínculo empregatício	De 1 a 3 salários mínimos (R$1.320 a R$3.960)	Não	Ceilândia	SUS e Redes Particulares	Não	Não	Não	3	4	4	3	3	3	4	4	3	3	4	4	4	3	2	2	5	4	4	4	2	5	1	2	4	4	5	5	1	2	4	2	2	2	2	2	2	3
41-45	Masculino	Branca	Superior Completo	Sim, sem vínculo empregatício	De 6 a 9 salários mínimos (R$7.920 a R$11.880)	Não	Água Claras	Redes Particulares	Não	Não	Não	2	3	2	3	3	3	3	4	2	3	3	3	3	3	3	5	4	4	5	4	5	4	4	5	4	5	5	2	2	2	4	4	4	4	4	4	4	3
18-25	Feminino	Parda	Superior Incompleto	Não	Até 1 salário mínimo (R$ 1.320)	Não	Arniqueira	Redes Particulares	Não	Não	Não	3	4	4	4	3	3	4	3	4	3	3	4	3	3	2	4	4	4	4	5	5	5	5	5	5	5	5	4	4	4	5	4	4	5	4	3	3	3
36-40	Feminino	Branca	Superior Completo	Sim, com vínculo empregatício	De 1 a 3 salários mínimos (R$1.320 a R$3.960)	Não	Park Way	Redes Particulares	Não	Não	Não	3	3	3	4	3	3	3	4	2	3	4	3	3	3	3	3	4	2	3	5	5	5	4	5	3	5	5	5	3	4	4	4	4	3	2	3	3	3
31-35	Feminino	Branca	Superior Completo	Sim, com vínculo empregatício	De 6 a 9 salários mínimos (R$7.920 a R$11.880)	Não	Taguatinga	SUS e Redes Particulares	Não	Não	Diabetes	3	3	3	3	3	3	3	4	4	3	4	4	3	4	2	4	3	4	4	4	5	5	2	4	5	1	5	5	2	3	3	2	1	1	1	0	3	2
36-40	Feminino	Branca	Superior Completo	Sim, com vínculo empregatício	De 6 a 9 salários mínimos (R$7.920 a R$11.880)	Não	Água Claras	Redes Particulares	Não	Não	Não	3	3	2	3	3	3	4	3	3	2	4	2	4	4	3	4	4	4	5	4	5	5	2	5	5	4	5	5	4	4	4	4	4	4	4	4	3	3
31-35	Masculino	Parda	Ensino Médio completo	Sim, sem vínculo empregatício	De 1 a 3 salários mínimos (R$1.320 a R$3.960)	Não	São Sebastião	SUS e Redes Particulares	Não	Não	Não	3	3	4	3	1	2	3	4	4	3	4	4	2	4	2	4	5	5	5	5	1	5	1	4	4	1	5	4	4	5	5	4	5	1	4	0	1	0
26-50	Feminino	Branca	Ensino Médio completo	Sim, com vínculo empregatício	De 1 a 3 salários mínimos (R$1.320 a R$3.960)	Sim	Sol Nascente/Pôr do Sol	SUS	Sim	Não	Hipertensão/pressão alta	3	3	4	4	3	3	4	2	3	1	3	2	3	3	3	5	5	5	5	1	5	5	2	4	4	5	5	5	3	1	4	4	2	1	4	3	3	3
18-25	Feminino	Parda	Superior Completo	Sim, sem vínculo empregatício	De 1 a 3 salários mínimos (R$1.320 a R$3.960)	Não	Riacho Fundo	Redes Particulares	Não	Não	Não	2	4	3	3	4	3	4	4	3	3	3	4	4	4	3	5	5	3	5	2	5	5	4	5	5	5	5	5	5	4	5	5	5	5	4	3	3	3
50+	Feminino	Parda	Superior Completo	Não	De 6 a 9 salários mínimos (R$7.920 a R$11.880)	Não	Água Claras	Redes Particulares	Não	Não	Não	3	4	3	3	4	3	3	4	3	1	4	3	3	3	3	4	2	2	5	4	5	5	4	5	2	5	5	4	2	1	4	2	2	2	3	3	3	2
26-30	Feminino	Branca	Superior Incompleto	Sim, com vínculo empregatício	De 1 a 3 salários mínimos (R$1.320 a R$3.960)	Não	Guará	SUS e Redes Particulares	Não	Não	Não	3	4	2	3	3	3	3	3	4	3	4	4	3	3	4	4	5	4	4	5	5	5	5	5	4	5	5	5	3	4	4	4	4	1	4	0	4	4
18-25	Feminino	Branca	Superior Completo	Sim, com vínculo empregatício	De 1 a 3 salários mínimos (R$1.320 a R$3.960)	Não	Riacho Fundo 2	Redes Particulares	Não	Não	Ansiedade	4	4	3	4	4	4	3	3	4	3	3	1	4	3	3	5	5	1	5	4	4	5	5	5	4	5	5	5	4	4	4	4	4	4	4	3	3	3
26-30	Feminino	Parda	Superior Completo	Sim, com vínculo empregatício	De 1 a 3 salários mínimos (R$1.320 a R$3.960)	Não	Ceilândia	SUS e Redes Particulares	Não	Não	Não	3	3	3	3	3	3	3	4	2	1	3	4	3	3	2	5	4	1	4	4	5	5	2	3	5	5	5	5	1	1	4	4	1	1	4	3	3	3
26-30	Feminino	Branca	Superior Completo	Sim, sem vínculo empregatício	De 3 a 6 salários mínimos (R$3.960 a R$7.920)	Não	Park Way	Redes Particulares	Não	Não	Não	3	4	3	4	4	3	4	3	2	3	4	3	3	4	3	4	4	2	4	4	5	5	4	5	3	5	5	5	3	5	5	5	3	4	4	4	3	3
26-50	Feminino	Branca	Superior Incompleto	Sim, com vínculo empregatício	De 3 a 6 salários mínimos (R$3.960 a R$7.920)	Não	Água Claras	Redes Particulares	Sim	Não	Não	4	3	4	4	4	3	4	3	2	3	4	4	1	1	4	5	4	1	4	1	5	5	5	2	5	5	5	5	1	1	1	1	1	1	1	4	3	3
18-25	Feminino	Branca	Superior Incompleto	Sim, com vínculo empregatício	De 1 a 3 salários mínimos (R$1.320 a R$3.960)	Não	Arniqueira	Redes Particulares	Não	Não	Não	3	4	3	4	4	4	4	4	4	3	3	3	3	4	3	4	5	2	4	5	5	5	2	4	4	5	5	2	4	5	5	5	4	2	4	3	3	3
31-35	Feminino	Branca	Superior Completo	Sim, sem vínculo empregatício	De 3 a 6 salários mínimos (R$3.960 a R$7.920)	Não	Água Claras	Redes Particulares	Não	Não	Não	3	3	3	3	4	3	4	4	4	3	4	3	2	3	3	2	2	1	4	5	5	5	4	4	5	5	4	2	3	4	4	4	3	4	4	2	2	3
18-25	Masculino	Parda	Ensino Médio completo	Sim, sem vínculo empregatício	De 1 a 3 salários mínimos (R$1.320 a R$3.960)	Sim	Samambaia	SUS e Redes Particulares	Não	Não	Não	3	2	3	3	4	1	3	3	3	2	3	2	3	3	3	2	2	4	3	5	4	5	2	5	5	5	5	4	2	2	4	2	4	3	4	2	3	4
36-40	Feminino	Branca	Superior Completo	Sim, sem vínculo empregatício	De 1 a 3 salários mínimos (R$1.320 a R$3.960)	Não	Água Claras	Redes Particulares	Sim	Não	Depressão	3	4	3	3	3	3	3	3	1	2	3	3	2	3	3	5	4	2	4	4	4	5	2	5	5	5	5	5	5	4	4	3	5	4	4	4	3	2
18-25	Masculino	Branca	Ensino Médio completo	Não	Até 1 salário mínimo (R$ 1.320)	Não	Água Claras	SUS e Redes Particulares	Não	Não	Não	3	3	3	3	4	3	4	3	4	3	4	4	4	2	3	2	5	5	5	5	5	5	5	5	4	4	3	5	5	5	5	4	5	5	5	3	2	3
50+	Masculino	Branca	Ensino Médio completo	Não	De 6 a 9 salários mínimos (R$7.920 a R$11.880)	Não	Água Claras	Redes Particulares	Sim	Não	Doenças cardiovasculares	2	3	3	2	3	2	3	3	3	1	1	3	3	3	2	2	5	5	5	5	5	5	4	5	5	5	5	5	1	1	4	5	1	1	1	3	4	3
26-50	Feminino	Branca	Superior Completo	Sim, com vínculo empregatício	De 1 a 3 salários mínimos (R$1.320 a R$3.960)	Não	Riacho Fundo	SUS e Redes Particulares	Sim	Não	Depressão	3	4	3	3	3	3	3	3	4	2	4	2	3	3	2	5	4	2	4	5	5	5	4	4	5	5	5	5	2	3	4	4	3	4	4	3	2	2
26-50	Feminino	Parda	Fundamental incompleto	Sim, com vínculo empregatício	De 1 a 3 salários mínimos (R$1.320 a R$3.960)	Não	Ceilândia	SUS	Não	Não	Não	2	4	3	3	3	3	3	3	3	2	3	3	3	4	2	4	2	4	5	1	2	5	2	2	2	4	5	4	2	1	4	4	5	1	4	1	0	2
26-30	Feminino	Parda	Superior Incompleto	Não	Até 1 salário mínimo (R$ 1.320)	Não	Plano Piloto	SUS e Redes Particulares	Não	Não	Não	3	2	3	4	4	3	4	4	2	3	4	3	4	3	2	4	4	4	4	5	5	5	2	5	5	5	5	5	4	4	5	4	3	2	4	2	2	3
18-25	Feminino	Branca	Superior Incompleto	Não	De 1 a 3 salários mínimos (R$1.320 a R$3.960)	Não	Plano Piloto	SUS e Redes Particulares	Não	Não	Não	3	3	4	4	3	4	3	2	3	3	3	1	4	2	3	3	3	4	2	2	2	2	2	4	5	5	5	5	3	4	3	3	2	4	4	3	3	4
18-25	Feminino	Parda	Superior Incompleto	Não	Até 1 salário mínimo (R$ 1.320)	Não	Núcleo Bandeirante	Redes Particulares	Não	Não	Não	3	3	4	3	4	3	4	4	4	3	4	3	3	2	2	4	5	5	4	2	4	5	4	5	2	4	5	5	2	2	4	2	2	3	4	2	2	3
26-30	Masculino	Parda	Superior Completo	Sim, com vínculo empregatício	De 3 a 6 salários mínimos (R$3.960 a R$7.920)	Não	Plano Piloto	Redes Particulares	Não	Não	Não	3	4	3	3	4	3	4	3	3	3	3	3	3	3	2	4	4	4	5	4	5	4	2	4	4	5	5	4	4	4	4	4	4	4	4	3	3	4
50+	Masculino	Branca	Superior Completo	Não	De 3 a 6 salários mínimos (R$3.960 a R$7.920)	Não	Plano Piloto	SUS e Redes Particulares	Sim	Não	Hipertensão/pressão alta	2	4	2	3	4	3	4	4	3	4	3	3	3	3	3	2	1	4	4	4	5	4	4	5	5	5	5	5	2	1	2	2	4	2	2	3	2	2
18-25	Feminino	Preta	Superior Incompleto	Não	Até 1 salário mínimo (R$ 1.320)	Não	Plano Piloto	Redes Particulares	Não	Não	Não	2	3	2	3	3	2	4	4	3	2	4	3	3	3	3	4	4	2	5	5	5	5	5	5	5	5	5	5	4	4	5	4	5	4	4	3	2	4
41-45	Masculino	Parda	Superior Completo	Sim, sem vínculo empregatício	De 10 a 20 salários mínimos (R$13.200 a R$26.400)	Não	Lago Sul	SUS e Redes Particulares	Sim	Não	Não	3	3	3	4	4	2	3	4	2	4	4	1	4	4	4	5	5	2	5	5	5	5	4	5	4	5	5	4	3	3	4	3	3	4	4	3	3	3
50+	Masculino	Branca	Superior Completo	Sim, sem vínculo empregatício	De 6 a 9 salários mínimos (R$7.920 a R$11.880)	Não	Plano Piloto	Redes Particulares	Não	Não	Não	3	3	2	3	3	3	3	3	3	2	3	2	3	4	3	5	4	2	5	4	5	2	2	5	4	5	5	4	2	1	4	4	1	4	2	3	2	3
50+	Feminino	Branca	Superior Completo	Não	De 3 a 6 salários mínimos (R$3.960 a R$7.920)	Não	Plano Piloto	SUS e Redes Particulares	Sim	Não	Não	3	3	3	3	3	3	4	3	4	1	4	4	3	3	3	4	2	2	5	5	5	4	2	5	2	5	5	5	2	2	4	4	2	4	2	2	2	3
50+	Feminino	Branca	Superior Completo	Não	De 3 a 6 salários mínimos (R$3.960 a R$7.920)	Não	Lago Sul	Redes Particulares	Não	Não	Não	3	3	2	4	4	2	4	4	2	3	4	2	4	4	3	4	4	2	5	4	4	4	4	5	5	5	5	5	4	4	5	4	4	4	4	4	3	3
50+	Feminino	Branca	Superior Completo	Não	De 3 a 6 salários mínimos (R$3.960 a R$7.920)	Não	Lago Sul	SUS e Redes Particulares	Sim	Não	Hipertensão/pressão alta	4	4	3	3	4	3	4	4	4	4	4	3	4	4	2	2	1	4	4	5	5	5	4	5	5	5	5	5	5	4	5	3	2	5	2	3	2	2
26-30	Masculino	Parda	Superior Incompleto	Sim, com vínculo empregatício	De 1 a 3 salários mínimos (R$1.320 a R$3.960)	Não	Riacho Fundo	SUS e Redes Particulares	Não	Não	Não	3	3	3	4	4	3	3	3	3	3	4	2	3	3	3	2	4	4	4	4	5	2	4	4	4	5	5	5	2	2	4	5	5	4	4	2	2	2
26-30	Feminino	Parda	Ensino Médio Incompleto	Sim, com vínculo empregatício	De 1 a 3 salários mínimos (R$1.320 a R$3.960)	Não	Candangolândia	SUS	Não	Não	Depressão	3	3	4	4	4	4	4	3	4	3	4	4	4	4	3	5	2	4	5	5	5	5	5	5	5	5	5	4	3	5	5	5	5	5	5	2	3	3
31-35	Feminino	Branca	Superior Completo	Sim, sem vínculo empregatício	De 3 a 6 salários mínimos (R$3.960 a R$7.920)	Sim	Lago Sul	Redes Particulares	Não	Não	Não	4	4	3	3	4	3	4	4	4	2	4	4	4	4	2	5	4	4	4	2	5	4	4	4	5	5	5	5	4	4	4	4	4	4	4	3	3	3
50+	Feminino	Branca	Ensino Médio completo	Sim, com vínculo empregatício	De 3 a 6 salários mínimos (R$3.960 a R$7.920)	Não	Plano Piloto	SUS e Redes Particulares	Sim	Não	Hipertensão/pressão alta	3	3	3	3	4	3	4	4	4	3	4	3	3	4	3	5	2	2	2	5	5	5	4	5	5	5	5	5	3	3	4	4	1	4	4	3	3	3
26-30	Feminino	Branca	Superior Completo	Sim, com vínculo empregatício	De 1 a 3 salários mínimos (R$1.320 a R$3.960)	Não	Plano Piloto	Redes Particulares	Não	Não	Depressão	3	4	4	4	4	4	4	4	4	3	4	3	4	3	3	5	5	2	4	5	5	5	2	4	2	5	5	5	4	4	4	4	5	5	4	3	2	3
26-30	Feminino	Branca	Superior Completo	Sim, com vínculo empregatício	De 1 a 3 salários mínimos (R$1.320 a R$3.960)	Não	Plano Piloto	Redes Particulares	Não	Não	Não	3	4	4	3	4	3	4	4	4	4	3	3	3	3	3	5	2	2	2	5	5	5	1	5	5	5	5	5	1	4	5	5	3	5	2	3	3	2
31-35	Feminino	Branca	Superior Completo	Sim, sem vínculo empregatício	De 6 a 9 salários mínimos (R$7.920 a R$11.880)	Não	Plano Piloto	SUS e Redes Particulares	Não	Não	Não	2	3	2	4	4	3	4	3	3	2	4	2	4	4	4	5	5	2	5	5	5	5	4	5	5	5	5	5	3	5	5	3	3	4	4	4	3	4
36-40	Feminino	Branca	Superior Completo	Sim, com vínculo empregatício	De 3 a 6 salários mínimos (R$3.960 a R$7.920)	Não	Núcleo Bandeirante	Redes Particulares	Não	Não	Não	3	3	4	3	4	3	3	3	2	3	3	3	3	3	2	5	4	1	5	4	5	4	2	5	2	5	5	4	3	2	4	4	4	4	3	3	2	3
26-30	Feminino	Branca	Superior Completo	Sim, com vínculo empregatício	De 3 a 6 salários mínimos (R$3.960 a R$7.920)	Não	Sobradinho	Redes Particulares	Não	Não	Não	3	4	2	4	4	3	4	4	4	2	4	1	3	3	3	4	4	2	4	4	5	4	4	5	4	5	5	5	4	4	5	5	5	5	5	2	2	4
18-25	Feminino	Branca	Superior Incompleto	Não	Até 1 salário mínimo (R$ 1.320)	Não	Plano Piloto	Redes Particulares	Não	Não	Não	3	3	3	3	4	2	4	3	4	3	4	2	3	3	3	4	5	2	5	5	5	5	4	5	4	5	5	5	4	5	5	4	5	5	5	2	3	4
50+	Masculino	Preta	Superior Completo	Sim, sem vínculo empregatício	De 3 a 6 salários mínimos (R$3.960 a R$7.920)	Não	Guará	SUS e Redes Particulares	Sim	Não	Hipertensão/pressão alta	3	3	3	3	3	3	3	4	4	3	4	3	3	3	2	4	5	2	5	4	4	5	4	5	4	5	5	4	4	4	4	2	2	3	4	3	3	4
50+	Masculino	Preta	Ensino Médio completo	Sim, sem vínculo empregatício	De 1 a 3 salários mínimos (R$1.320 a R$3.960)	Sim	Paranoá	SUS	Não	Não	Não	2	3	3	2	2	2	3	2	2	2	3	3	3	2	4	2	1	1	2	2	2	2	2	2	2	2	4	2	1	1	2	2	1	1	2	3	2	3
18-25	Feminino	Parda	Superior Incompleto	Sim, com vínculo empregatício	De 1 a 3 salários mínimos (R$1.320 a R$3.960)	Não	Taguatinga	SUS e Redes Particulares	Não	Não	Não	2	3	2	3	3	3	4	4	4	2	4	2	4	4	4	4	4	2	5	4	5	4	4	5	5	5	5	5	3	4	5	5	5	4	4	3	2	3
18-25	Feminino	Parda	Superior Incompleto	Sim, com vínculo empregatício	De 1 a 3 salários mínimos (R$1.320 a R$3.960)	Sim	Riacho Fundo	SUS e Redes Particulares	Não	Não	Não	2	3	3	4	3	3	3	3	1	2	4	2	3	3	4	5	3	1	1	3	3	5	5	5	3	5	5	5	3	5	5	5	4	4	4	4	0	2
26-50	Feminino	Parda	Ensino Médio completo	Sim, sem vínculo empregatício	Até 1 salário mínimo (R$ 1.320)	Não	Santa Maria	SUS e Redes Particulares	Não	Não	Não	3	3	3	3	4	3	3	4	4	3	4	3	3	3	3	2	2	2	2	4	3	2	1	2	4	1	4	4	2	1	4	4	2	4	4	3	2	2
18-25	Masculino	Parda	Superior Incompleto	Sim, com vínculo empregatício	De 1 a 3 salários mínimos (R$1.320 a R$3.960)	Não	Vicente Pires	Redes Particulares	Não	Não	Não	3	4	4	3	3	3	3	4	3	3	4	2	3	3	2	4	4	4	4	4	4	4	4	4	4	4	4	5	4	4	4	4	4	4	4	3	3	3
18-25	Feminino	Branca	Superior Incompleto	Não	Até 1 salário mínimo (R$ 1.320)	Não	Cruzeiro	SUS e Redes Particulares	Sim	Não	Não	3	3	3	3	4	3	3	3	3	2	4	1	4	4	3	4	5	4	5	5	5	5	4	5	4	5	5	5	4	4	5	5	5	4	5	2	3	1
31-35	Feminino	Parda	Superior Incompleto	Sim, sem vínculo empregatício	De 1 a 3 salários mínimos (R$1.320 a R$3.960)	Não	Planaltina	SUS e Redes Particulares	Não	Não	Não	3	4	3	4	1	3	4	4	3	3	4	4	2	1	2	4	1	1	5	1	4	5	1	4	5	5	5	5	1	1	5	5	5	2	4	3	2	3
50+	Feminino	Preta	Ensino Médio completo	Sim, com vínculo empregatício	De 1 a 3 salários mínimos (R$1.320 a R$3.960)	Não	Ceilândia	SUS e Redes Particulares	Não	Não	Não	2	3	3	2	4	2	3	4	4	3	4	4	2	4	1	5	2	5	5	2	2	5	2	4	1	1	1	4	2	1	1	1	1	1	1	2	0	2
31-35	Masculino	Preta	Ensino Médio completo	Sim, com vínculo empregatício	De 1 a 3 salários mínimos (R$1.320 a R$3.960)	Sim	Recanto Das Emas	SUS	Não	Não	Não	3	4	4	4	4	4	4	4	4	2	3	4	3	1	2	4	4	5	4	5	5	5	1	5	5	5	5	5	2	5	5	4	4	5	5	2	2	3
18-25	Feminino	Branca	Ensino Médio completo	Sim, com vínculo empregatício	Até 1 salário mínimo (R$ 1.320)	Sim	Núcleo Bandeirante	SUS	Não	Não	Não	2	3	3	3	4	4	4	1	3	1	4	4	4	4	4	5	4	1	5	2	5	5	5	5	5	5	5	5	1	3	4	4	3	3	4	3	3	3
26-30	Feminino	Branca	Ensino Médio completo	Sim, com vínculo empregatício	De 1 a 3 salários mínimos (R$1.320 a R$3.960)	Não	Ceilândia	SUS	Não	Não	Não	3	4	4	2	3	3	3	3	1	4	1	4	4	3	2	4	4	5	5	2	2	2	1	5	5	5	5	5	1	1	4	4	4	1	4	4	4	1
26-30	Feminino	Preta	Superior Incompleto	Não	Até 1 salário mínimo (R$ 1.320)	Não	Ceilândia	SUS	Não	Não	Não	4	4	3	3	4	3	4	4	4	3	4	3	4	2	2	5	5	5	5	5	5	5	2	5	5	5	5	5	2	4	5	4	5	4	4	0	3	4
18-25	Masculino	Parda	Fundamental completo	Sim, sem vínculo empregatício	De 1 a 3 salários mínimos (R$1.320 a R$3.960)	Não	Planaltina	SUS	Não	Não	Não	3	3	4	3	3	3	3	3	2	3	4	3	3	4	2	1	4	5	2	2	2	2	1	4	2	4	5	4	2	1	4	2	2	1	2	2	2	2
18-25	Feminino	Branca	Superior Incompleto	Não	De 1 a 3 salários mínimos (R$1.320 a R$3.960)	Não	Samambaia	SUS e Redes Particulares	Não	Não	Não	3	3	2	3	3	2	3	2	2	2	3	2	4	4	3	4	5	4	5	5	5	4	2	4	4	5	5	5	4	2	4	5	5	4	5	3	2	3
26-30	Feminino	Parda	Superior Incompleto	Sim, com vínculo empregatício	De 1 a 3 salários mínimos (R$1.320 a R$3.960)	Não	Sobradinho	Redes Particulares	Não	Não	Não	2	3	2	3	3	2	4	3	4	2	4	3	3	3	3	4	5	4	5	4	4	4	4	4	4	5	5	4	4	4	4	5	5	4	4	3	3	3
18-25	Feminino	Parda	Ensino Médio completo	Não	De 3 a 6 salários mínimos (R$3.960 a R$7.920)	Sim	Ceilândia	SUS e Redes Particulares	Não	Não	Não	4	4	3	3	4	3	3	3	3	3	3	2	3	3	3	4	5	1	5	5	5	5	4	5	5	5	5	5	4	4	5	5	5	4	4	3	3	3
26-30	Masculino	Parda	Ensino Médio completo	Sim, com vínculo empregatício	De 1 a 3 salários mínimos (R$1.320 a R$3.960)	Não	Planaltina	SUS e Redes Particulares	Não	Não	Não	3	3	2	4	2	2	3	4	2	3	3	2	3	2	3	5	5	4	5	4	2	4	2	2	5	5	5	5	2	1	4	1	1	1	1	4	3	4
18-25	Feminino	Preta	Superior Incompleto	Não	Até 1 salário mínimo (R$ 1.320)	Não	Itapoã	SUS	Não	Não	Não	3	4	3	4	3	3	4	4	4	2	3	2	2	3	2	5	5	4	5	5	5	5	4	5	5	5	5	4	4	4	5	5	4	2	4	0	4	4
18-25	Feminino	Parda	Superior Completo	Sim, com vínculo empregatício	De 1 a 3 salários mínimos (R$1.320 a R$3.960)	Não	Ceilândia	SUS	Não	Não	Não	3	3	4	3	4	3	3	4	4	2	4	3	3	3	2	4	5	2	5	5	5	5	2	5	5	5	5	5	4	5	5	5	5	5	5	3	2	3
18-25	Feminino	Parda	Ensino Médio completo	Sim, com vínculo empregatício	De 1 a 3 salários mínimos (R$1.320 a R$3.960)	Não	Taguatinga	SUS	Não	Não	Não	4	4	4	4	4	4	4	4	4	3	3	3	3	3	3	2	4	4	4	5	5	5	5	5	5	5	4	5	5	5	5	5	5	5	5	3	3	2
18-25	Masculino	Parda	Ensino Médio completo	Sim, com vínculo empregatício	De 1 a 3 salários mínimos (R$1.320 a R$3.960)	Não	Núcleo Bandeirante	SUS	Não	Não	Não	3	3	2	3	4	4	3	3	2	2	2	2	3	4	3	5	4	2	4	2	2	5	2	4	2	2	4	2	1	4	4	2	5	1	1	2	2	2
18-25	Masculino	Branca	Superior Incompleto	Sim, sem vínculo empregatício	De 1 a 3 salários mínimos (R$1.320 a R$3.960)	Não	Recanto Das Emas	SUS e Redes Particulares	Sim	Não	Não	3	4	4	3	4	3	4	4	2	3	4	2	3	4	3	4	5	5	5	5	5	5	1	5	5	5	5	5	4	2	5	5	1	1	4	3	4	3
18-25	Feminino	Branca	Superior Incompleto	Não	De 1 a 3 salários mínimos (R$1.320 a R$3.960)	Não	Candangolândia	SUS e Redes Particulares	Não	Não	Não	3	4	3	1	3	3	3	3	4	2	3	2	2	3	2	2	5	1	3	5	5	5	4	5	5	5	5	5	3	3	4	5	5	5	3	2	2	0
26-30	Masculino	Preta	Ensino Médio completo	Não	Até 1 salário mínimo (R$ 1.320)	Não	Recanto Das Emas	SUS	Sim	Não	Outra	2	2	3	3	3	3	3	3	3	3	4	3	3	3	3	2	5	2	2	4	2	5	2	2	4	5	5	4	2	2	4	2	2	1	4	3	3	3
31-35	Feminino	Parda	Superior Completo	Sim, com vínculo empregatício	De 1 a 3 salários mínimos (R$1.320 a R$3.960)	Sim	Cruzeiro	Redes Particulares	Não	Não	Não	3	3	2	3	3	2	3	4	3	2	4	3	3	3	1	4	4	5	4	2	4	5	4	5	5	4	5	5	4	4	4	4	4	4	4	3	0	3
18-25	Feminino	Parda	Superior Incompleto	Sim, sem vínculo empregatício	De 1 a 3 salários mínimos (R$1.320 a R$3.960)	Não	Cruzeiro	SUS	Não	Não	Não	3	3	2	4	3	3	3	3	4	3	4	2	3	3	3	2	4	5	5	5	5	5	4	5	5	5	5	5	4	4	5	4	5	5	4	3	2	3
18-25	Feminino	Branca	Superior Incompleto	Não	Até 1 salário mínimo (R$ 1.320)	Não	Núcleo Bandeirante	Redes Particulares	Sim	Não	Depressão	2	2	3	4	4	4	4	4	1	4	4	2	4	4	4	5	5	3	4	5	5	5	3	5	4	5	5	5	5	5	5	5	5	5	5	3	3	4
26-30	Feminino	Parda	Superior Incompleto	Sim, com vínculo empregatício	De 1 a 3 salários mínimos (R$1.320 a R$3.960)	Não	Estrutural/Scia	SUS	Não	Não	Não	4	4	4	4	4	4	4	4	4	3	4	2	4	4	2	5	5	5	5	5	5	5	5	5	5	5	5	5	5	5	5	5	5	5	5	0	2	3
18-25	Masculino	Parda	Ensino Médio completo	Não	De 1 a 3 salários mínimos (R$1.320 a R$3.960)	Não	Guará	Redes Particulares	Não	Não	Não	4	3	4	2	4	1	4	4	4	3	3	2	2	3	4	2	1	5	2	5	1	5	2	1	1	2	2	4	2	2	4	2	1	1	2	1	1	1
18-25	Masculino	Parda	Ensino Médio completo	Não	Até 1 salário mínimo (R$ 1.320)	Não	Vicente Pires	SUS e Redes Particulares	Não	Não	Não	3	3	3	2	3	3	4	3	3	1	4	1	2	3	3	5	3	5	4	4	4	4	2	4	4	5	4	5	4	4	5	5	5	4	4	2	3	2
18-25	Feminino	Branca	Ensino Médio completo	Não	De 1 a 3 salários mínimos (R$1.320 a R$3.960)	Não	Paranoá	SUS	Não	Não	Não	3	3	2	3	3	2	3	4	2	3	4	3	3	3	2	2	5	5	5	1	2	2	1	2	3	2	2	2	4	2	1	1	4	4	1	3	3	1
18-25	Masculino	Preta	Ensino Médio completo	Sim, com vínculo empregatício	De 1 a 3 salários mínimos (R$1.320 a R$3.960)	Não	Paranoá	Redes Particulares	Não	Não	Não	2	3	3	3	3	3	3	4	2	2	4	3	3	4	3	5	5	5	5	4	2	5	2	5	5	5	5	5	2	4	5	5	5	4	4	3	3	3
26-30	Feminino	Parda	Ensino Médio completo	Sim, sem vínculo empregatício	Até 1 salário mínimo (R$ 1.320)	Não	Sobradinho	SUS e Redes Particulares	Não	Não	Não	2	3	3	2	4	3	3	3	1	2	4	3	4	4	2	5	5	5	5	4	1	2	1	2	2	2	4	2	2	2	2	2	2	2	4	3	3	3
50+	Masculino	Parda	Ensino Médio completo	Não	De 1 a 3 salários mínimos (R$1.320 a R$3.960)	Não	Itapoã	SUS	Sim	Não	Hipertensão/pressão alta	2	3	1	1	3	2	3	1	2	1	4	2	2	3	4	1	2	1	1	5	5	5	5	5	5	4	1	4	3	5	5	5	3	1	1	3	3	0
18-25	Masculino	Parda	Ensino Médio completo	Não	Até 1 salário mínimo (R$ 1.320)	Não	Samambaia	SUS	Não	Não	Não	3	3	3	2	3	3	3	3	4	3	3	2	3	3	4	2	4	4	4	1	2	2	2	4	2	4	2	4	2	1	4	1	1	2	2	2	3	2
18-25	Masculino	Branca	Superior Incompleto	Sim, com vínculo empregatício	De 3 a 6 salários mínimos (R$3.960 a R$7.920)	Não	Planaltina	SUS e Redes Particulares	Não	Não	Não	3	4	4	3	3	3	3	3	3	2	4	3	3	3	2	2	4	5	5	4	4	4	4	4	2	5	5	5	3	1	4	5	5	4	4	2	1	2
18-25	Masculino	Branca	Superior Incompleto	Sim, sem vínculo empregatício	Até 1 salário mínimo (R$ 1.320)	Não	Ceilândia	SUS e Redes Particulares	Sim	Não	Outra	3	3	4	4	4	3	4	4	2	1	4	3	4	4	3	5	5	5	5	5	5	5	4	5	4	5	4	5	5	4	4	4	4	4	4	3	3	4
26-30	Masculino	Branca	Superior Incompleto	Sim, com vínculo empregatício	De 1 a 3 salários mínimos (R$1.320 a R$3.960)	Não	Plano Piloto	Redes Particulares	Sim	Não	Não	4	3	3	4	3	3	3	4	4	4	4	3	3	3	3	5	5	5	5	4	5	4	4	5	5	5	5	5	5	5	5	5	5	5	4	3	3	3
41-45	Feminino	Parda	Superior Completo	Não	De 1 a 3 salários mínimos (R$1.320 a R$3.960)	Não	Riacho Fundo	SUS	Não	Não	Não	3	3	3	3	3	3	3	4	4	3	4	4	4	4	2	2	5	5	4	5	5	5	1	2	5	5	5	5	2	4	4	4	1	1	4	2	2	2
31-35	Masculino	Parda	Ensino Médio completo	Não	De 1 a 3 salários mínimos (R$1.320 a R$3.960)	Sim	Estrutural/Scia	SUS	Não	Não	Não	2	3	3	4	3	2	4	4	3	3	3	3	3	3	2	2	2	1	1	3	3	3	2	3	2	4	5	5	5	4	5	5	3	4	4	1	1	2
31-35	Feminino	Parda	Superior Incompleto	Não	Até 1 salário mínimo (R$ 1.320)	Não	Itapoã	SUS	Não	Não	Não	3	4	3	3	3	3	3	3	4	2	3	2	4	3	3	2	5	2	5	5	5	2	4	4	2	5	5	5	5	5	5	5	5	5	5	2	2	2
26-50	Feminino	Parda	Superior Completo	Sim, sem vínculo empregatício	De 1 a 3 salários mínimos (R$1.320 a R$3.960)	Não	Sobradinho	SUS	Não	Não	Não	3	4	3	3	1	3	4	4	3	1	4	3	4	4	1	2	2	2	5	5	2	4	2	5	1	5	5	5	3	4	5	5	2	3	4	3	3	3
18-25	Feminino	Parda	Superior Incompleto	Sim, sem vínculo empregatício	De 1 a 3 salários mínimos (R$1.320 a R$3.960)	Não	Jardim Botânico	SUS	Não	Não	Não	3	4	3	2	3	2	2	4	3	3	4	3	3	4	3	5	4	3	5	5	5	4	4	5	3	5	4	4	3	4	4	2	4	4	4	2	3	2
50+	Feminino	Parda	Ensino Médio completo	Não	De 1 a 3 salários mínimos (R$1.320 a R$3.960)	Sim	Samambaia	SUS	Sim	Não	Depressão	3	3	4	4	4	4	4	2	4	1	4	3	4	3	3	5	5	4	5	4	5	5	5	5	5	5	5	5	5	3	5	5	5	5	5	2	3	3
50+	Masculino	Branca	Fundamental incompleto	Sim, sem vínculo empregatício	De 3 a 6 salários mínimos (R$3.960 a R$7.920)	Sim	Planaltina	SUS e Redes Particulares	Sim	Não	Outra	3	3	3	3	3	3	3	3	3	2	3	3	3	3	2	2	5	4	5	1	1	2	1	1	2	5	5	4	1	1	1	1	1	1	1	3	3	4
18-25	Masculino	Branca	Superior Incompleto	Sim, sem vínculo empregatício	De 1 a 3 salários mínimos (R$1.320 a R$3.960)	Não	Ceilândia	SUS	Não	Não	Não	4	3	2	3	3	3	3	4	3	3	4	3	3	4	2	3	4	4	5	4	5	5	4	5	5	5	5	5	3	5	5	5	4	3	5	1	3	3
31-35	Feminino	Parda	Superior Completo	Sim, sem vínculo empregatício	De 10 a 20 salários mínimos (R$13.200 a R$26.400)	Sim	Arniqueira	Redes Particulares	Não	Não	Não	3	3	3	4	4	3	4	4	4	3	4	3	3	3	3	4	4	4	5	4	5	5	5	5	5	5	5	5	4	4	4	4	4	4	4	2	2	3
26-30	Feminino	Preta	Superior Completo	Sim, com vínculo empregatício	De 3 a 6 salários mínimos (R$3.960 a R$7.920)	Sim	Água Claras	SUS e Redes Particulares	Não	Não	Não	2	1	2	4	4	3	3	1	4	3	4	4	4	4	1	1	2	2	1	1	5	3	4	4	4	4	5	5	3	5	5	4	3	5	5	4	4	1
26-50	Masculino	Parda	Superior Completo	Sim, com vínculo empregatício	De 6 a 9 salários mínimos (R$7.920 a R$11.880)	Não	Água Claras	Redes Particulares	Não	Não	Não	1	2	1	3	2	2	3	3	3	1	4	2	3	3	3	5	5	2	5	4	4	4	4	5	4	5	5	4	2	1	4	4	4	4	4	2	2	4
26-30	Masculino	Branca	Superior Completo	Sim, com vínculo empregatício	De 3 a 6 salários mínimos (R$3.960 a R$7.920)	Não	Água Claras	Redes Particulares	Não	Não	Não	3	3	2	3	3	3	4	4	4	2	4	2	4	4	4	5	5	2	5	5	5	5	2	2	2	5	5	5	2	2	4	2	3	3	3	3	3	4
26-50	Feminino	Parda	Superior Completo	Sim, com vínculo empregatício	De 3 a 6 salários mínimos (R$3.960 a R$7.920)	Não	Samambaia	SUS e Redes Particulares	Sim	Não	Não	1	3	2	2	2	2	3	3	3	3	1	1	3	3	2	4	4	4	4	5	5	5	2	4	2	5	5	5	2	4	4	4	2	2	2	2	2	2
26-50	Feminino	Branca	Superior Incompleto	Sim, com vínculo empregatício	De 3 a 6 salários mínimos (R$3.960 a R$7.920)	Não	Arniqueira	SUS e Redes Particulares	Não	Não	Depressão	1	3	1	3	3	2	4	4	4	1	4	2	4	4	4	5	5	1	5	2	5	5	5	5	2	5	5	5	2	4	5	5	5	5	4	4	2	4
31-35	Feminino	Parda	Ensino Médio completo	Sim, com vínculo empregatício	De 1 a 3 salários mínimos (R$1.320 a R$3.960)	Não	Ceilândia	SUS	Não	Não	Não	3	4	3	3	3	2	3	4	4	3	4	3	4	4	3	2	4	2	4	4	5	5	5	2	4	5	5	5	2	1	4	4	4	4	4	3	2	4
41-45	Feminino	Parda	Ensino Médio completo	Sim, com vínculo empregatício	De 1 a 3 salários mínimos (R$1.320 a R$3.960)	Não	Riacho Fundo 2	SUS	Não	Não	Não	3	3	4	4	3	3	3	4	3	3	4	3	3	4	1	2	2	5	4	4	4	4	4	2	5	5	5	4	4	3	5	5	5	4	4	2	2	2
18-25	Masculino	Branca	Ensino Médio Incompleto	Não	Até 1 salário mínimo (R$ 1.320)	Não	Arniqueira	SUS	Não	Não	Não	4	4	4	4	4	4	4	4	2	3	4	3	4	4	2	2	2	4	5	2	5	5	2	5	4	4	4	5	4	5	5	5	5	5	4	2	3	3
18-25	Masculino	Parda	Superior Incompleto	Sim, sem vínculo empregatício	De 1 a 3 salários mínimos (R$1.320 a R$3.960)	Não	Água Claras	Redes Particulares	Não	Não	Não	3	3	2	3	3	2	4	4	4	1	4	2	4	4	3	4	5	4	5	4	5	5	2	4	5	5	5	5	4	4	5	5	5	4	4	3	3	4
26-50	Feminino	Parda	Ensino Médio completo	Sim, sem vínculo empregatício	De 1 a 3 salários mínimos (R$1.320 a R$3.960)	Não	Planaltina	SUS	Sim	Não	Outra	3	2	3	3	3	3	3	3	3	3	3	3	3	3	2	5	1	1	5	5	5	5	4	2	4	5	5	5	4	2	5	4	5	4	5	1	2	2
18-25	Feminino	Branca	Superior Incompleto	Não	De 6 a 9 salários mínimos (R$7.920 a R$11.880)	Não	Recanto Das Emas	Redes Particulares	Não	Não	Não	4	4	4	3	3	3	3	3	4	3	4	2	3	4	3	5	4	2	5	5	5	5	5	5	2	5	5	5	5	5	5	5	5	5	5	3	4	4
18-25	Feminino	Preta	Superior Incompleto	Não	De 6 a 9 salários mínimos (R$7.920 a R$11.880)	Não	Taguatinga	Redes Particulares	Não	Não	Não	4	3	3	3	4	3	4	3	3	3	4	3	4	3	2	5	5	1	5	5	5	5	5	5	2	5	5	5	3	4	5	5	5	3	3	4	4	3
26-30	Feminino	Preta	Superior Completo	Não	Até 1 salário mínimo (R$ 1.320)	Não	Samambaia	SUS e Redes Particulares	Não	Não	Não	2	2	1	3	3	2	4	3	3	2	4	2	4	3	3	4	4	4	5	4	5	4	2	4	4	5	5	5	2	4	4	5	3	4	4	2	2	3
26-50	Masculino	Parda	Superior Completo	Sim, sem vínculo empregatício	De 6 a 9 salários mínimos (R$7.920 a R$11.880)	Não	Água Claras	Redes Particulares	Não	Não	Não	3	2	1	4	3	3	4	3	3	3	4	2	3	3	3	5	4	2	4	2	4	4	2	4	4	5	5	4	4	4	5	4	2	4	4	3	3	3
18-25	Feminino	Parda	Ensino Médio completo	Não	Até 1 salário mínimo (R$ 1.320)	Não	Água Claras	Redes Particulares	Não	Não	Não	3	3	3	4	3	3	4	3	4	3	4	3	3	4	2	2	4	1	4	5	5	5	4	5	4	5	5	4	4	4	4	4	4	4	4	2	2	3
18-25	Masculino	Parda	Superior Incompleto	Sim, com vínculo empregatício	De 1 a 3 salários mínimos (R$1.320 a R$3.960)	Não	Samambaia	SUS e Redes Particulares	Não	Não	Não	2	4	3	3	3	3	4	4	2	1	4	3	3	4	2	5	4	4	5	2	5	5	4	4	4	4	2	5	5	5	5	5	4	2	4	0	0	2
36-40	Masculino	Branca	Superior Completo	Sim, sem vínculo empregatício	De 6 a 9 salários mínimos (R$7.920 a R$11.880)	Sim	Água Claras	SUS e Redes Particulares	Não	Não	Não	2	3	1	3	3	1	3	4	4	3	4	2	3	4	4	5	5	4	5	4	4	5	2	5	4	5	5	4	4	4	4	5	5	4	4	3	2	4
50+	Feminino	Branca	Superior Completo	Não	De 1 a 3 salários mínimos (R$1.320 a R$3.960)	Não	Água Claras	SUS e Redes Particulares	Sim	Não	Hipertensão/pressão alta	3	4	3	3	3	3	4	4	4	4	4	3	4	3	3	4	2	2	4	5	5	4	2	4	5	5	5	5	2	1	2	2	3	1	2	2	2	3
18-25	Feminino	Branca	Ensino Médio Incompleto	Não	Até 1 salário mínimo (R$ 1.320)	Não	Água Claras	SUS e Redes Particulares	Não	Não	Não	3	3	3	3	3	3	3	3	4	2	4	3	3	4	3	2	5	2	4	5	5	5	5	5	5	5	5	5	5	5	5	5	5	5	5	2	3	2
41-45	Masculino	Parda	Superior Completo	Sim, com vínculo empregatício	De 6 a 9 salários mínimos (R$7.920 a R$11.880)	Sim	Água Claras	SUS e Redes Particulares	Não	Não	Não	3	3	4	3	4	2	3	3	2	3	3	3	3	3	3	5	5	5	5	5	5	5	2	5	5	5	5	5	2	4	4	4	5	4	4	3	3	3
31-35	Feminino	Branca	Superior Completo	Sim, sem vínculo empregatício	De 6 a 9 salários mínimos (R$7.920 a R$11.880)	Sim	Água Claras	SUS e Redes Particulares	Sim	Não	Depressão	3	4	3	4	4	3	4	3	4	3	4	2	3	4	4	5	3	4	5	5	5	5	4	5	4	5	5	5	2	2	4	4	4	4	4	3	3	2
31-35	Feminino	Parda	Ensino Médio completo	Sim, sem vínculo empregatício	De 1 a 3 salários mínimos (R$1.320 a R$3.960)	Não	Taguatinga	SUS	Não	Não	Não	3	3	2	3	3	2	3	4	3	3	4	2	3	4	2	4	4	2	4	2	4	5	4	5	4	5	4	4	4	4	4	4	5	2	4	3	3	2
31-35	Feminino	Branca	Superior Completo	Não	De 1 a 3 salários mínimos (R$1.320 a R$3.960)	Não	Água Claras	Redes Particulares	Sim	Não	Depressão	3	4	4	3	3	3	1	4	4	3	4	3	3	3	2	5	2	2	5	2	5	5	4	4	4	5	5	5	2	2	4	4	4	5	4	3	3	3
41-45	Feminino	Branca	Superior Completo	Não	De 6 a 9 salários mínimos (R$7.920 a R$11.880)	Não	Água Claras	Redes Particulares	Sim	Não	Depressão	2	4	4	3	4	3	3	4	4	3	4	2	4	4	3	5	5	2	5	5	5	5	2	5	4	5	5	5	4	5	5	5	5	5	5	4	3	3
18-25	Feminino	Parda	Fundamental incompleto	Sim, sem vínculo empregatício	De 1 a 3 salários mínimos (R$1.320 a R$3.960)	Não	Samambaia	SUS	Não	Não	Não	3	4	4	3	3	3	3	3	3	3	3	3	3	3	2	2	1	4	4	1	1	5	5	4	2	4	5	4	1	5	5	5	5	5	5	0	2	3
36-40	Masculino	Preta	Superior Completo	Sim, com vínculo empregatício	De 10 a 20 salários mínimos (R$13.200 a R$26.400)	Não	Água Claras	Redes Particulares	Não	Não	Não	3	4	4	4	4	3	4	4	4	4	4	2	3	3	3	5	4	2	5	5	5	5	5	5	2	5	5	5	3	3	4	4	3	5	4	4	4	4
18-25	Masculino	Parda	Superior Completo	Sim, com vínculo empregatício	De 1 a 3 salários mínimos (R$1.320 a R$3.960)	Não	São Sebastião	SUS e Redes Particulares	Não	Não	Não	4	3	3	3	4	3	3	4	3	3	4	3	3	4	3	4	4	2	2	5	5	4	4	5	2	5	5	5	5	2	4	5	5	4	4	2	2	2
41-45	Feminino	Parda	Ensino Médio Incompleto	Sim, sem vínculo empregatício	De 1 a 3 salários mínimos (R$1.320 a R$3.960)	Sim	Guará	SUS e Redes Particulares	Não	Não	Não	2	2	2	3	2	2	3	4	1	4	3	2	2	2	4	4	2	4	2	2	2	2	2	4	4	4	5	4	2	1	4	3	2	1	4	3	1	2
41-45	Feminino	Parda	Ensino Médio completo	Não	Até 1 salário mínimo (R$ 1.320)	Sim	Samambaia	SUS	Sim	Não	Depressão	4	2	2	3	4	1	4	4	1	3	4	2	2	2	4	5	2	4	5	4	5	5	4	5	4	5	5	5	1	1	1	1	1	1	1	4	3	3
41-45	Feminino	Parda	Ensino Médio completo	Não	Até 1 salário mínimo (R$ 1.320)	Sim	Samambaia	SUS	Sim	Não	Depressão	4	2	2	3	4	1	4	4	1	3	4	2	2	2	4	5	2	4	5	4	5	5	4	5	4	5	5	5	1	1	1	1	1	1	1	4	3	3
36-40	Masculino	Parda	Superior Incompleto	Sim, com vínculo empregatício	De 1 a 3 salários mínimos (R$1.320 a R$3.960)	Não	Samambaia	SUS	Não	Não	Não	3	3	3	3	3	3	3	3	2	2	4	3	3	4	2	1	1	5	4	5	5	5	1	2	5	5	5	5	1	5	5	5	4	4	5	3	3	2
18-25	Masculino	Preta	Ensino Médio completo	Sim, com vínculo empregatício	De 1 a 3 salários mínimos (R$1.320 a R$3.960)	Não	Gama	SUS	Não	Não	Não	3	2	3	4	4	2	4	3	4	3	4	3	3	4	3	5	5	4	5	4	4	5	4	4	4	5	5	5	5	4	5	5	5	4	5	1	1	3
18-25	Feminino	Preta	Superior Incompleto	Não	De 3 a 6 salários mínimos (R$3.960 a R$7.920)	Não	Samambaia	SUS	Não	Não	Não	3	3	2	3	3	3	4	4	4	4	4	2	2	3	3	2	5	5	5	5	5	4	5	5	4	5	5	4	3	4	5	4	4	4	4	3	2	3
18-25	Feminino	Parda	Ensino Médio completo	Sim, com vínculo empregatício	De 1 a 3 salários mínimos (R$1.320 a R$3.960)	Não	Ceilândia	SUS	Não	Não	Não	3	3	2	4	4	2	3	4	2	3	3	4	4	4	3	2	2	5	5	3	4	4	4	4	5	5	5	5	3	3	4	4	2	2	4	0	3	0
18-25	Feminino	Branca	Superior Incompleto	Sim, sem vínculo empregatício	Até 1 salário mínimo (R$ 1.320)	Sim	Ceilândia	Redes Particulares	Não	Não	Não	2	2	2	3	3	1	2	3	4	3	4	2	3	2	4	5	1	1	4	5	4	5	2	5	5	5	5	5	5	3	5	5	5	4	4	3	3	3
18-25	Masculino	Parda	Superior Incompleto	Sim, com vínculo empregatício	De 1 a 3 salários mínimos (R$1.320 a R$3.960)	Não	Itapoã	Redes Particulares	Não	Não	Não	3	4	4	4	4	3	3	4	2	1	4	3	4	4	2	5	5	2	5	5	5	5	4	4	4	4	5	5	5	2	4	4	4	2	4	0	2	3
26-30	Masculino	Parda	Ensino Médio completo	Sim, com vínculo empregatício	De 1 a 3 salários mínimos (R$1.320 a R$3.960)	Não	Planaltina	SUS e Redes Particulares	Não	Não	Não	3	3	3	4	4	3	3	3	3	3	4	2	3	4	3	5	5	2	5	4	4	5	4	5	4	4	4	4	4	4	4	4	4	1	4	3	0	3
41-45	Feminino	Parda	Ensino Médio completo	Sim, sem vínculo empregatício	De 1 a 3 salários mínimos (R$1.320 a R$3.960)	Sim	Núcleo Bandeirante	SUS e Redes Particulares	Não	Não	Não	3	3	3	3	3	4	4	3	4	2	4	3	3	3	2	5	1	4	5	2	4	5	2	2	4	5	5	4	5	4	4	5	4	4	4	2	4	2
26-30	Feminino	Parda	Ensino Médio completo	Sim, com vínculo empregatício	De 1 a 3 salários mínimos (R$1.320 a R$3.960)	Sim	Ceilândia	SUS e Redes Particulares	Não	Não	Não	3	3	3	3	3	3	4	4	4	2	3	3	3	3	3	2	4	5	4	2	4	2	2	5	2	5	5	5	4	2	5	5	5	4	4	2	2	2
50+	Feminino	Parda	Superior Completo	Sim, com vínculo empregatício	De 3 a 6 salários mínimos (R$3.960 a R$7.920)	Sim	Park Way	SUS e Redes Particulares	Sim	Não	Não	3	4	4	3	3	2	3	4	2	3	4	2	2	4	2	5	4	4	5	5	5	5	5	5	4	5	5	5	5	2	4	5	2	5	5	2	1	1
41-45	Feminino	Parda	Ensino Médio completo	Sim, com vínculo empregatício	De 1 a 3 salários mínimos (R$1.320 a R$3.960)	Sim	Planaltina	SUS	Não	Não	Não	3	3	3	3	3	2	4	3	3	3	4	3	3	3	3	2	5	5	5	5	1	5	1	1	1	2	4	4	5	5	5	5	2	2	4	3	3	3
18-25	Masculino	Preta	Ensino Médio completo	Não	De 1 a 3 salários mínimos (R$1.320 a R$3.960)	Não	Planaltina	SUS	Não	Não	Não	2	4	2	3	2	2	3	4	4	2	4	1	3	2	4	4	4	4	5	2	2	5	2	5	5	5	5	5	4	2	4	3	3	4	4	3	2	4
26-30	Feminino	Preta	Ensino Médio completo	Não	Até 1 salário mínimo (R$ 1.320)	Não	Gama	SUS e Redes Particulares	Não	Não	Não	4	4	4	3	3	4	4	4	4	3	4	3	3	4	1	2	4	5	5	5	5	5	2	5	4	5	5	5	5	5	5	5	4	4	5	2	2	2
50+	Feminino	Branca	Fundamental incompleto	Sim, sem vínculo empregatício	De 1 a 3 salários mínimos (R$1.320 a R$3.960)	Sim	São Sebastião	SUS e Redes Particulares	Sim	Não	Não	3	3	3	3	3	3	4	3	4	3	4	3	3	3	3	5	5	5	5	5	5	5	2	5	5	5	5	5	5	5	5	5	5	5	5	3	3	3
18-25	Feminino	Preta	Ensino Médio completo	Sim, com vínculo empregatício	De 1 a 3 salários mínimos (R$1.320 a R$3.960)	Não	Itapoã	SUS	Não	Não	Não	3	3	3	3	3	3	3	3	3	3	3	3	3	3	3	1	4	4	4	2	4	2	2	2	4	5	5	5	2	2	4	4	2	2	3	2	3	2
18-25	Feminino	Branca	Ensino Médio Incompleto	Sim, com vínculo empregatício	Até 1 salário mínimo (R$ 1.320)	Não	Paranoá	SUS e Redes Particulares	Não	Não	Doenças cardiovasculares	3	1	1	3	3	1	3	2	1	3	3	3	3	3	4	5	5	5	5	3	3	5	2	3	5	1	1	3	4	2	4	4	3	1	2	2	4	4
31-35	Feminino	Parda	Superior Completo	Sim, com vínculo empregatício	De 6 a 9 salários mínimos (R$7.920 a R$11.880)	Sim	Samambaia	Redes Particulares	Sim	Não	Não	3	3	3	3	3	3	3	2	2	2	4	2	3	3	2	5	4	3	5	5	5	5	5	5	5	5	1	5	2	1	2	3	3	1	3	3	4	4
18-25	Feminino	Preta	Superior Incompleto	Sim, com vínculo empregatício	De 1 a 3 salários mínimos (R$1.320 a R$3.960)	Não	Santa Maria	SUS	Não	Não	Não	3	3	4	3	3	3	3	4	4	3	4	3	3	3	2	5	5	2	5	5	5	4	2	5	4	5	5	5	5	4	5	4	3	4	4	2	2	3
26-50	Feminino	Parda	Superior Completo	Sim, com vínculo empregatício	De 3 a 6 salários mínimos (R$3.960 a R$7.920)	Não	Gama	SUS e Redes Particulares	Não	Não	Não	2	4	2	4	4	2	3	3	3	3	4	3	2	3	3	2	4	2	4	2	4	2	2	4	2	5	5	5	4	2	4	4	5	4	4	3	2	3
18-25	Masculino	Preta	Superior Incompleto	Sim, sem vínculo empregatício	De 1 a 3 salários mínimos (R$1.320 a R$3.960)	Não	Planaltina	SUS	Não	Não	Não	2	4	4	3	3	3	4	4	3	2	4	2	3	3	3	2	4	1	2	5	5	5	4	5	5	4	5	5	3	4	5	5	5	4	5	2	3	2
50+	Feminino	Preta	Superior Completo	Sim, com vínculo empregatício	De 3 a 6 salários mínimos (R$3.960 a R$7.920)	Não	Ceilândia	SUS e Redes Particulares	Sim	Não	Outra	3	4	3	4	4	3	3	3	4	3	4	3	3	4	2	4	5	5	5	4	5	5	4	5	4	5	5	5	4	4	5	4	5	4	5	3	3	3
18-25	Feminino	Parda	Superior Incompleto	Não	Até 1 salário mínimo (R$ 1.320)	Não	Planaltina	SUS e Redes Particulares	Não	Não	Não	2	2	2	3	4	1	4	4	4	1	4	2	4	4	3	5	1	1	5	5	5	5	5	5	5	5	5	5	5	5	5	5	5	5	5	3	3	4
18-25	Feminino	Branca	Superior Incompleto	Sim, com vínculo empregatício	Até 1 salário mínimo (R$ 1.320)	Não	Sudoeste/Octogonal	Redes Particulares	Não	Não	Não	3	3	3	3	3	3	3	4	2	3	4	3	3	4	1	5	5	1	5	2	5	5	2	2	5	5	5	5	4	5	5	5	5	4	5	4	3	4
26-30	Feminino	Preta	Ensino Médio completo	Sim, com vínculo empregatício	De 1 a 3 salários mínimos (R$1.320 a R$3.960)	Não	Recanto Das Emas	SUS e Redes Particulares	Não	Não	Não	3	3	3	3	3	3	3	3	2	3	3	2	3	3	3	2	4	5	4	2	5	5	2	4	5	4	5	5	1	2	5	5	5	4	4	3	3	2
36-40	Feminino	Branca	Ensino Médio completo	Sim, com vínculo empregatício	De 1 a 3 salários mínimos (R$1.320 a R$3.960)	Não	Santa Maria	Redes Particulares	Não	Não	Não	2	3	3	3	3	2	4	3	4	3	4	3	3	3	2	4	5	5	5	5	5	5	4	5	5	4	5	5	4	4	4	4	4	4	4	2	3	3
31-35	Masculino	Parda	Ensino Médio completo	Sim, com vínculo empregatício	De 1 a 3 salários mínimos (R$1.320 a R$3.960)	Sim	Paranoá	SUS e Redes Particulares	Não	Não	Não	3	3	3	4	4	2	4	4	3	3	4	2	3	4	2	5	4	5	5	4	5	5	5	5	5	4	4	4	4	2	4	4	4	1	4	0	3	3
18-25	Masculino	Preta	Ensino Médio completo	Sim, com vínculo empregatício	De 3 a 6 salários mínimos (R$3.960 a R$7.920)	Não	Jardim Botânico	Redes Particulares	Não	Não	Não	2	2	3	3	3	2	3	3	3	3	3	1	3	3	2	4	4	5	5	2	2	5	5	5	2	5	5	5	4	5	5	5	5	5	5	3	3	3
18-25	Masculino	Parda	Superior Incompleto	Sim, sem vínculo empregatício	Até 1 salário mínimo (R$ 1.320)	Não	Guará	SUS e Redes Particulares	Não	Não	Não	3	4	3	3	3	3	3	4	2	3	4	1	4	4	4	1	3	1	4	5	5	5	3	5	4	5	4	5	3	4	4	4	3	3	3	0	2	2
18-25	Feminino	Parda	Superior Incompleto	Não	De 1 a 3 salários mínimos (R$1.320 a R$3.960)	Não	Recanto Das Emas	SUS e Redes Particulares	Não	Não	Não	2	3	1	4	3	3	3	3	3	2	3	3	3	1	3	5	5	1	5	5	5	5	5	5	5	5	5	5	5	5	5	5	5	5	5	3	3	2
18-25	Feminino	Preta	Superior Incompleto	Sim, com vínculo empregatício	De 1 a 3 salários mínimos (R$1.320 a R$3.960)	Não	Guará	SUS e Redes Particulares	Não	Não	Não	4	4	3	2	3	2	3	3	4	4	4	2	3	3	3	5	2	5	4	4	5	5	4	5	4	5	5	5	4	5	5	4	4	4	4	3	2	3
41-45	Feminino	Parda	Superior Incompleto	Sim, sem vínculo empregatício	Até 1 salário mínimo (R$ 1.320)	Não	Recanto Das Emas	SUS	Não	Não	Não	4	3	3	3	4	3	4	4	3	3	4	4	3	3	1	4	5	4	5	1	5	5	1	1	5	4	5	2	1	1	1	2	2	1	1	2	2	3
18-25	Feminino	Branca	Ensino Médio completo	Não	De 1 a 3 salários mínimos (R$1.320 a R$3.960)	Não	Recanto Das Emas	SUS	Não	Não	Não	3	3	3	3	3	3	3	4	4	3	4	3	3	2	2	2	5	4	4	4	4	5	4	4	4	5	5	4	2	2	4	4	4	2	4	2	2	3
26-30	Masculino	Preta	Superior Completo	Sim, sem vínculo empregatício	De 1 a 3 salários mínimos (R$1.320 a R$3.960)	Não	Santa Maria	SUS	Não	Não	Não	2	3	2	4	4	2	3	3	4	3	4	2	3	4	4	3	4	4	4	5	5	5	2	4	3	5	4	5	4	4	5	4	3	1	4	0	3	2
31-35	Masculino	Parda	Superior Completo	Sim, sem vínculo empregatício	De 3 a 6 salários mínimos (R$3.960 a R$7.920)	Sim	Santa Maria	SUS	Não	Não	Não	3	4	3	3	4	3	4	4	1	3	4	3	3	4	3	2	3	2	4	5	5	4	4	5	4	5	5	5	4	2	4	4	5	4	4	3	2	4
18-25	Feminino	Parda	Ensino Médio completo	Não	De 10 a 20 salários mínimos (R$13.200 a R$26.400)	Não	Jardim Botânico	SUS e Redes Particulares	Não	Não	Não	3	3	1	3	4	3	3	3	2	3	4	4	3	3	2	5	5	4	5	5	5	3	5	5	4	5	4	5	3	3	4	3	4	3	3	2	4	2
18-25	Feminino	Parda	Superior Completo	Sim, sem vínculo empregatício	De 1 a 3 salários mínimos (R$1.320 a R$3.960)	Não	Riacho Fundo 2	SUS	Não	Não	Não	3	3	2	3	4	3	4	4	4	3	4	3	3	4	2	4	4	2	4	5	5	5	5	5	5	5	5	5	4	5	5	5	5	5	5	2	2	3
31-35	Masculino	Parda	Superior Completo	Sim, com vínculo empregatício	De 6 a 9 salários mínimos (R$7.920 a R$11.880)	Sim	Plano Piloto	Redes Particulares	Sim	Não	Depressão	3	4	2	4	4	3	4	3	3	2	4	2	2	4	2	5	5	2	5	5	5	5	4	5	5	5	5	4	4	4	5	4	5	5	4	2	2	4
26-50	Feminino	Indígena	Fundamental incompleto	Sim, com vínculo empregatício	De 1 a 3 salários mínimos (R$1.320 a R$3.960)	Não	Samambaia	SUS	Não	Não	Não	3	3	3	3	3	3	3	4	3	3	3	3	3	3	2	1	1	5	2	5	1	5	5	5	5	5	5	5	4	1	5	4	5	4	4	2	2	1
36-40	Masculino	Preta	Ensino Médio completo	Sim, sem vínculo empregatício	De 1 a 3 salários mínimos (R$1.320 a R$3.960)	Não	Paranoá	SUS	Não	Não	Não	3	3	3	3	3	3	2	2	2	3	3	3	3	4	1	2	4	5	4	5	4	2	4	5	5	2	5	4	4	1	4	2	5	4	2	2	2	3
26-30	Masculino	Branca	Superior Completo	Não	De 3 a 6 salários mínimos (R$3.960 a R$7.920)	Sim	Água Claras	Redes Particulares	Não	Não	Não	1	4	1	3	3	2	4	2	4	2	3	1	2	2	3	4	5	4	5	4	4	4	2	4	2	5	5	4	3	2	3	3	5	4	4	3	3	4
50+	Feminino	Parda	Superior Completo	Não	De 6 a 9 salários mínimos (R$7.920 a R$11.880)	Não	Plano Piloto	Redes Particulares	Sim	Não	Hipertensão/pressão alta	3	3	3	3	4	3	3	4	4	2	4	2	3	4	1	5	2	5	5	5	5	5	5	5	4	5	5	5	3	4	5	5	5	5	5	3	3	3
18-25	Masculino	Parda	Ensino Médio completo	Não	De 1 a 3 salários mínimos (R$1.320 a R$3.960)	Não	Santa Maria	SUS e Redes Particulares	Sim	Sim	Não	3	3	3	4	3	3	3	3	4	3	4	3	3	3	2	4	5	5	5	5	1	2	2	4	4	5	4	4	2	4	5	5	5	4	4	3	0	3
50+	Feminino	Branca	Superior Completo	Não	De 3 a 6 salários mínimos (R$3.960 a R$7.920)	Não	Plano Piloto	Redes Particulares	Sim	Não	Depressão	3	3	4	2	3	2	4	4	3	2	4	3	3	3	3	5	5	2	4	4	2	2	2	4	4	4	5	4	2	2	4	4	2	4	2	2	3	4
41-45	Feminino	Parda	Fundamental incompleto	Não	Até 1 salário mínimo (R$ 1.320)	Sim	Candangolândia	SUS	Não	Não	Câncer	3	3	3	2	3	2	3	3	2	3	3	3	3	4	1	2	4	2	4	5	5	5	1	5	2	4	5	5	5	5	5	5	5	4	5	2	3	2
41-45	Masculino	Branca	Fundamental incompleto	Sim, sem vínculo empregatício	De 1 a 3 salários mínimos (R$1.320 a R$3.960)	Não	Guará	SUS e Redes Particulares	Não	Não	Não	3	3	3	2	4	2	3	2	4	1	4	3	3	3	2	5	5	5	5	1	2	1	2	5	5	4	5	5	1	5	4	5	3	1	5	3	3	3
26-50	Feminino	Preta	Superior Completo	Sim, com vínculo empregatício	De 6 a 9 salários mínimos (R$7.920 a R$11.880)	Não	Park Way	Redes Particulares	Sim	Não	Ansiedade	3	4	4	3	3	3	4	3	4	4	4	3	3	2	3	5	4	2	5	5	5	5	4	4	2	4	4	4	2	2	2	2	3	2	2	3	3	3
36-40	Feminino	Parda	Superior Completo	Sim, com vínculo empregatício	De 6 a 9 salários mínimos (R$7.920 a R$11.880)	Não	Plano Piloto	SUS e Redes Particulares	Não	Não	Outra	3	3	4	3	4	3	3	4	2	3	4	3	2	3	2	5	5	1	5	2	5	5	5	5	4	5	5	5	2	2	5	5	4	5	5	4	4	3
26-30	Feminino	Preta	Superior Completo	Não	De 1 a 3 salários mínimos (R$1.320 a R$3.960)	Não	Sobradinho	SUS e Redes Particulares	Não	Não	Não	3	4	3	4	4	3	3	3	4	3	4	3	3	3	3	4	2	2	4	5	5	5	4	4	4	5	5	5	4	2	4	4	4	4	4	3	0	3
50+	Masculino	Branca	Superior Completo	Sim, com vínculo empregatício	De 6 a 9 salários mínimos (R$7.920 a R$11.880)	Não	Paranoá	SUS	Sim	Sim	Depressão	3	3	3	4	3	4	3	2	2	2	3	3	4	4	4	3	2	4	5	3	5	5	3	4	5	5	5	5	3	4	4	4	4	1	3	4	4	4
18-25	Feminino	Parda	Ensino Médio completo	Não	Até 1 salário mínimo (R$ 1.320)	Não	Jardim Botânico	SUS	Não	Não	Não	3	3	3	2	4	2	4	4	2	3	3	1	3	3	3	4	5	4	5	4	2	5	4	5	2	4	5	5	3	2	4	3	2	4	3	3	2	3
36-40	Feminino	Parda	Ensino Médio completo	Sim, com vínculo empregatício	De 1 a 3 salários mínimos (R$1.320 a R$3.960)	Não	Gama	SUS	Não	Não	Não	2	4	1	3	3	2	4	3	4	4	4	2	3	2	3	5	4	2	5	4	4	2	2	5	5	5	5	5	4	4	5	5	4	4	4	3	4	3
41-45	Feminino	Preta	Superior Completo	Sim, com vínculo empregatício	De 10 a 20 salários mínimos (R$13.200 a R$26.400)	Sim	Plano Piloto	SUS e Redes Particulares	Sim	Não	Depressão	3	2	3	2	3	3	3	3	3	2	4	3	3	4	3	2	4	4	4	4	5	2	4	4	2	5	5	5	4	2	4	4	4	4	4	4	3	3
50+	Feminino	Parda	Ensino Médio completo	Sim, com vínculo empregatício	De 1 a 3 salários mínimos (R$1.320 a R$3.960)	Sim	Planaltina	SUS	Sim	Não	Diabetes	3	2	3	3	3	3	3	3	4	3	4	3	3	3	2	2	2	1	1	5	2	5	1	5	5	5	5	5	4	5	5	5	5	5	5	2	1	1
26-50	Masculino	Parda	Superior Completo	Sim, com vínculo empregatício	De 3 a 6 salários mínimos (R$3.960 a R$7.920)	Não	Samambaia	Redes Particulares	Não	Não	Não	3	3	4	3	3	1	2	3	3	2	3	2	3	4	3	5	5	5	5	4	4	5	3	5	5	5	5	1	2	4	4	4	4	2	5	2	1	1
26-30	Masculino	Branca	Superior Completo	Sim, com vínculo empregatício	De 3 a 6 salários mínimos (R$3.960 a R$7.920)	Não	Guará	SUS e Redes Particulares	Não	Não	Não	2	4	1	3	4	2	4	3	4	2	4	2	1	3	2	4	5	4	5	4	5	4	2	5	4	5	5	4	4	4	5	4	3	4	4	3	3	4
18-25	Feminino	Parda	Ensino Médio completo	Não	Até 1 salário mínimo (R$ 1.320)	Não	Sobradinho II	SUS	Sim	Sim	Depressão	3	3	3	3	3	3	3	3	3	2	4	3	3	3	2	5	5	4	4	3	2	5	4	4	4	5	4	5	4	4	3	3	4	3	4	3	3	3
50+	Feminino	Branca	Fundamental completo	Não	Até 1 salário mínimo (R$ 1.320)	Não	Recanto Das Emas	SUS	Não	Sim	Depressão	3	3	3	3	3	3	2	3	3	3	4	3	3	4	2	1	2	1	1	5	2	1	4	4	4	5	5	5	4	1	4	4	2	2	4	1	3	2
36-40	Masculino	Parda	Ensino Médio completo	Sim, sem vínculo empregatício	De 1 a 3 salários mínimos (R$1.320 a R$3.960)	Não	Sobradinho	SUS e Redes Particulares	Não	Não	Não	3	3	3	3	3	3	3	3	3	2	4	3	3	2	2	5	5	2	5	5	5	5	2	5	5	5	5	5	1	3	4	4	2	1	4	3	3	4
31-35	Masculino	Branca	Superior Completo	Sim, sem vínculo empregatício	De 3 a 6 salários mínimos (R$3.960 a R$7.920)	Sim	Taguatinga	Redes Particulares	Não	Não	Não	2	2	3	2	3	3	3	3	2	3	3	2	2	3	2	5	5	2	5	5	2	5	2	4	5	5	5	5	1	2	5	4	1	1	1	4	2	3
18-25	Masculino	Preta	Fundamental incompleto	Não	Até 1 salário mínimo (R$ 1.320)	Não	Estrutural/Scia	SUS e Redes Particulares	Sim	Não	Não	2	3	3	3	2	2	2	2	3	3	3	3	3	3	2	2	4	2	2	1	3	2	2	2	2	4	2	2	2	1	5	1	2	4	4	2	3	1
26-50	Feminino	Branca	Ensino Médio completo	Não	De 3 a 6 salários mínimos (R$3.960 a R$7.920)	Não	Planaltina	SUS e Redes Particulares	Não	Não	Não	3	3	3	3	2	2	3	1	4	3	4	2	1	3	3	5	2	1	5	4	5	4	4	5	5	5	5	5	2	3	4	3	1	2	3	3	4	2
31-35	Feminino	Branca	Superior Completo	Sim, com vínculo empregatício	De 3 a 6 salários mínimos (R$3.960 a R$7.920)	Sim	Plano Piloto	Redes Particulares	Não	Não	Depressão	3	4	4	4	4	3	4	3	4	4	4	2	3	4	3	4	4	2	5	3	5	5	4	5	4	5	5	4	3	4	5	5	4	3	4	3	4	3
41-45	Feminino	Parda	Superior Completo	Sim, sem vínculo empregatício	De 3 a 6 salários mínimos (R$3.960 a R$7.920)	Não	Paranoá	SUS e Redes Particulares	Sim	Não	Outra	4	3	4	4	4	3	4	2	3	3	3	3	3	3	2	5	5	1	5	5	5	2	4	5	4	5	5	5	2	2	4	4	1	4	4	3	3	4
50+	Masculino	Branca	Ensino Médio Incompleto	Sim, com vínculo empregatício	De 1 a 3 salários mínimos (R$1.320 a R$3.960)	Não	Planaltina	SUS	Não	Não	Não	3	3	3	2	3	2	3	3	3	2	3	3	3	3	3	4	2	4	4	4	2	4	1	4	4	2	4	4	3	4	4	4	4	2	4	2	2	2
18-25	Masculino	Preta	Superior Completo	Sim, com vínculo empregatício	De 1 a 3 salários mínimos (R$1.320 a R$3.960)	Não	Plano Piloto	SUS	Não	Não	Depressão	1	4	4	4	4	4	4	3	4	3	4	4	3	4	4	5	5	1	5	5	5	5	5	5	3	1	5	5	2	5	5	5	5	2	5	3	3	3
26-50	Masculino	Parda	Ensino Médio Incompleto	Sim, com vínculo empregatício	De 1 a 3 salários mínimos (R$1.320 a R$3.960)	Não	Planaltina	SUS	Sim	Não	Outra	4	3	3	3	4	3	4	3	4	2	4	4	2	4	2	3	2	5	5	4	4	5	4	4	5	5	5	5	1	3	4	3	3	1	3	3	3	3
50+	Feminino	Branca	Ensino Médio completo	Não	De 1 a 3 salários mínimos (R$1.320 a R$3.960)	Sim	Paranoá	SUS	Sim	Sim	Hipertensão/pressão alta	2	3	3	3	3	2	3	2	3	3	4	2	3	4	2	2	5	5	5	1	2	4	2	5	4	1	5	5	5	1	5	2	5	5	4	3	2	2
50+	Feminino	Parda	Fundamental completo	Não	Até 1 salário mínimo (R$ 1.320)	Sim	Planaltina	SUS	Sim	Não	Depressão	2	4	4	4	4	4	3	4	4	2	4	3	3	4	2	1	1	1	2	5	5	5	1	5	1	5	5	5	1	1	5	5	1	1	1	3	3	2
26-30	Masculino	Parda	Superior Completo	Sim, sem vínculo empregatício	De 1 a 3 salários mínimos (R$1.320 a R$3.960)	Não	Paranoá	SUS e Redes Particulares	Não	Não	Hipertensão/pressão alta	1	3	3	1	1	1	1	3	2	3	4	3	3	1	3	3	2	1	1	5	4	5	2	5	3	1	5	5	4	4	5	5	4	1	3	3	3	3
26-50	Masculino	Parda	Superior Completo	Sim, sem vínculo empregatício	De 6 a 9 salários mínimos (R$7.920 a R$11.880)	Não	Guará	Redes Particulares	Sim	Não	Diabetes	3	4	2	3	3	2	3	4	3	4	4	4	4	4	3	5	1	1	1	2	2	4	2	2	5	5	1	5	1	1	1	1	1	1	3	4	4	0
26-30	Feminino	Branca	Superior Incompleto	Não	Até 1 salário mínimo (R$ 1.320)	Não	Taguatinga	SUS e Redes Particulares	Não	Não	Não	3	4	3	3	3	3	4	4	3	3	4	2	3	2	4	5	5	5	5	5	5	5	4	5	2	5	5	5	5	3	4	3	3	3	4	4	3	4
26-50	Masculino	Preta	Superior Completo	Sim, com vínculo empregatício	De 3 a 6 salários mínimos (R$3.960 a R$7.920)	Não	Paranoá	SUS e Redes Particulares	Sim	Não	Hipertensão/pressão alta	3	3	1	3	3	3	4	2	4	2	3	3	3	4	2	2	4	2	4	2	5	2	2	5	5	5	5	4	2	1	4	4	2	1	2	3	2	2
31-35	Masculino	Parda	Ensino Médio completo	Sim, sem vínculo empregatício	De 1 a 3 salários mínimos (R$1.320 a R$3.960)	Sim	Ceilândia	Redes Particulares	Sim	Não	Não	2	2	1	3	3	1	3	2	2	3	3	2	1	3	4	2	4	2	4	4	2	2	2	5	4	5	5	4	3	2	4	5	4	1	3	2	1	3
36-40	Feminino	Branca	Ensino Médio completo	Sim, sem vínculo empregatício	De 1 a 3 salários mínimos (R$1.320 a R$3.960)	Não	Santa Maria	SUS	Não	Não	Não	3	4	4	4	4	4	4	4	3	4	3	4	3	4	2	5	4	5	5	5	5	5	2	5	5	5	5	5	2	1	3	2	1	1	1	3	3	3
18-25	Feminino	Parda	Superior Incompleto	Não	De 1 a 3 salários mínimos (R$1.320 a R$3.960)	Não	São Sebastião	SUS	Não	Não	Não	3	3	3	3	4	4	3	3	3	3	3	3	3	3	3	4	4	4	3	3	5	5	5	5	3	5	5	5	3	5	5	5	5	5	5	2	2	3
18-25	Masculino	Parda	Ensino Médio Incompleto	Sim, sem vínculo empregatício	Até 1 salário mínimo (R$ 1.320)	Não	Riacho Fundo 2	SUS	Não	Não	Não	3	3	4	3	4	1	4	2	3	1	3	4	3	4	1	5	4	4	3	2	4	5	5	5	3	5	2	2	3	3	3	4	2	3	3	2	2	2
31-35	Feminino	Branca	Superior Completo	Sim, sem vínculo empregatício	De 1 a 3 salários mínimos (R$1.320 a R$3.960)	Sim	Jardim Botânico	SUS e Redes Particulares	Não	Não	Não	2	3	3	3	3	3	3	3	2	3	4	2	3	2	3	3	4	5	5	4	5	5	4	5	2	5	5	5	4	4	5	4	5	4	4	3	4	4
36-40	Masculino	Branca	Superior Completo	Sim, com vínculo empregatício	De 10 a 20 salários mínimos (R$13.200 a R$26.400)	Não	Sobradinho II	SUS e Redes Particulares	Não	Não	Não	2	3	3	3	3	3	2	3	2	2	4	4	3	1	4	1	2	1	2	3	4	4	4	5	2	4	4	4	3	2	4	2	2	1	2	4	2	1
26-30	Feminino	Preta	Superior Completo	Sim, com vínculo empregatício	De 1 a 3 salários mínimos (R$1.320 a R$3.960)	Não	Planaltina	SUS	Sim	Não	Outra	1	1	2	3	3	2	3	2	2	3	4	2	2	2	2	4	5	2	4	4	5	2	2	4	4	5	5	2	4	2	4	3	5	2	4	3	2	4
26-30	Feminino	Parda	Superior Incompleto	Sim, com vínculo empregatício	Até 1 salário mínimo (R$ 1.320)	Não	Itapoã	SUS	Sim	Não	Depressão	3	4	3	3	2	3	3	2	2	3	3	3	3	4	3	3	2	4	2	5	5	5	3	5	4	5	5	5	4	5	5	5	5	5	5	0	2	3
36-40	Feminino	Parda	Ensino Médio Incompleto	Sim, com vínculo empregatício	De 1 a 3 salários mínimos (R$1.320 a R$3.960)	Sim	Planaltina	SUS	Não	Não	Não	1	3	4	4	3	3	3	3	3	2	1	3	4	3	2	5	5	5	5	1	1	3	4	3	4	3	4	4	1	3	1	1	3	5	2	4	4	2
18-25	Feminino	Parda	Superior Incompleto	Sim, sem vínculo empregatício	Até 1 salário mínimo (R$ 1.320)	Sim	Plano Piloto	SUS	Não	Não	Não	2	4	3	4	3	3	3	1	3	3	4	2	3	4	4	4	5	4	1	4	5	5	2	5	4	5	4	3	4	4	4	4	3	5	4	1	3	3
18-25	Feminino	Preta	Ensino Médio completo	Sim, com vínculo empregatício	De 1 a 3 salários mínimos (R$1.320 a R$3.960)	Sim	Santa Maria	SUS	Não	Não	Não	3	4	3	3	3	4	3	2	4	4	3	3	3	3	2	2	4	3	4	2	3	5	3	5	2	4	2	5	3	4	5	4	3	2	4	2	1	3
31-35	Masculino	Preta	Superior Incompleto	Sim, com vínculo empregatício	De 1 a 3 salários mínimos (R$1.320 a R$3.960)	Não	Paranoá	Redes Particulares	Sim	Não	Diabetes	1	3	2	4	1	2	4	4	3	3	3	3	1	4	4	2	2	4	4	3	5	5	1	5	2	2	3	5	5	5	5	5	5	5	5	1	1	1
18-25	Feminino	Parda	Superior Incompleto	Não	Até 1 salário mínimo (R$ 1.320)	Não	Lago Norte	Redes Particulares	Não	Não	Não	3	3	3	3	3	3	3	3	2	2	3	3	3	2	2	3	3	3	4	3	5	5	4	5	4	5	5	4	3	3	4	4	5	4	4	2	2	4
26-30	Masculino	Parda	Superior Completo	Sim, com vínculo empregatício	De 3 a 6 salários mínimos (R$3.960 a R$7.920)	Sim	Sobradinho	Redes Particulares	Sim	Não	Outra	3	3	3	4	4	4	3	4	2	1	3	4	3	4	3	4	4	3	5	4	2	5	1	2	2	5	5	4	2	2	2	2	2	1	2	2	3	3
18-25	Feminino	Preta	Ensino Médio completo	Sim, com vínculo empregatício	Até 1 salário mínimo (R$ 1.320)	Não	Gama	SUS e Redes Particulares	Não	Não	Depressão	3	4	3	4	4	3	3	4	4	2	3	2	3	4	3	5	4	4	4	5	5	5	4	5	2	5	5	5	4	4	5	4	4	5	4	1	3	0
18-25	Feminino	Parda	Superior Incompleto	Sim, sem vínculo empregatício	Até 1 salário mínimo (R$ 1.320)	Não	Ceilândia	SUS	Sim	Não	Depressão	4	4	4	4	4	3	4	4	4	3	4	3	3	4	4	5	5	5	5	5	5	5	4	5	5	5	5	5	5	5	5	5	5	5	3	1	2	3
26-30	Masculino	Parda	Superior Incompleto	Sim, com vínculo empregatício	De 1 a 3 salários mínimos (R$1.320 a R$3.960)	Não	Ceilândia	SUS	Sim	Não	Hipertensão/pressão alta	2	3	2	3	3	2	3	3	2	3	4	3	1	1	4	4	4	5	5	1	1	1	1	1	1	1	1	5	5	5	5	5	4	5	5	0	0	0
18-25	Feminino	Parda	Superior Incompleto	Não	Até 1 salário mínimo (R$ 1.320)	Não	Paranoá	SUS	Não	Não	Não	4	4	3	3	3	3	4	4	3	2	3	3	3	3	2	3	2	3	4	4	5	5	4	3	5	5	5	5	2	2	3	3	4	3	3	2	0	0
18-25	Masculino	Branca	Superior Incompleto	Sim, sem vínculo empregatício	Até 1 salário mínimo (R$ 1.320)	Não	Ceilândia	SUS	Não	Não	Não	3	3	4	4	4	4	3	3	2	3	4	2	3	3	4	1	3	1	1	5	5	5	5	5	3	5	5	5	4	4	4	5	4	4	4	1	1	1
26-30	Feminino	Preta	Superior Incompleto	Sim, sem vínculo empregatício	Até 1 salário mínimo (R$ 1.320)	Não	Taguatinga	SUS e Redes Particulares	Sim	Não	Depressão	3	4	4	1	4	3	3	4	4	3	4	3	3	4	4	5	4	4	5	5	5	4	4	5	5	5	5	5	5	5	5	5	5	4	5	3	2	3
31-35	Feminino	Parda	Ensino Médio Incompleto	Não	De 1 a 3 salários mínimos (R$1.320 a R$3.960)	Não	Paranoá	SUS	Não	Não	Não	3	4	3	3	3	3	4	2	4	3	3	3	3	3	2	1	2	5	4	4	5	4	2	2	2	4	4	4	4	2	4	5	5	2	4	2	2	2
18-25	Feminino	Parda	Superior Incompleto	Não	Até 1 salário mínimo (R$ 1.320)	Não	Sobradinho	SUS	Não	Não	Não	3	3	4	4	4	4	4	4	4	4	4	2	3	4	2	5	5	4	5	5	5	5	4	5	5	5	5	5	5	4	5	4	5	5	5	3	3	4
31-35	Feminino	Parda	Ensino Médio completo	Não	Até 1 salário mínimo (R$ 1.320)	Não	Estrutural/Scia	SUS e Redes Particulares	Não	Não	Diabetes	2	4	4	3	3	3	3	4	3	2	4	3	2	4	3	5	2	2	5	1	4	4	4	4	5	5	5	5	3	1	4	4	3	1	4	3	0	3
31-35	Masculino	Branca	Superior Completo	Sim, sem vínculo empregatício	De 3 a 6 salários mínimos (R$3.960 a R$7.920)	Não	Plano Piloto	SUS	Não	Não	Não	1	2	1	3	3	2	1	1	4	3	3	2	3	4	3	2	2	5	3	3	4	3	2	2	3	3	4	3	2	3	3	2	3	1	2	3	4	3
18-25	Feminino	Parda	Superior Incompleto	Não	Até 1 salário mínimo (R$ 1.320)	Não	Plano Piloto	SUS e Redes Particulares	Não	Não	Não	3	3	3	4	4	2	2	3	4	3	2	3	3	3	3	5	4	5	5	2	4	4	2	5	5	5	5	5	2	4	5	4	3	2	3	4	3	3
18-25	Feminino	Amarela	Superior Incompleto	Sim, com vínculo empregatício	Até 1 salário mínimo (R$ 1.320)	Não	Taguatinga	SUS e Redes Particulares	Não	Não	Não	4	4	4	2	3	3	4	4	4	2	4	4	3	3	2	5	5	5	5	4	5	4	5	5	4	3	5	5	5	5	5	5	5	2	5	3	3	2
18-25	Masculino	Preta	Superior Completo	Não	Até 1 salário mínimo (R$ 1.320)	Não	Plano Piloto	SUS	Não	Não	Não	2	1	3	1	4	3	3	1	2	2	4	3	3	3	2	5	2	5	5	5	2	5	2	4	4	5	4	4	4	2	4	4	5	4	4	2	2	4
18-25	Masculino	Preta	Superior Incompleto	Sim, sem vínculo empregatício	Até 1 salário mínimo (R$ 1.320)	Não	Gama	Redes Particulares	Não	Não	Não	2	4	3	4	4	4	4	4	4	3	4	3	4	4	4	5	2	1	5	5	5	5	4	5	5	5	5	5	5	5	5	5	5	5	5	3	3	3
18-25	Feminino	Parda	Superior Incompleto	Não	Até 1 salário mínimo (R$ 1.320)	Não	Itapoã	SUS e Redes Particulares	Não	Não	Não	3	3	3	3	3	4	1	3	3	2	3	3	3	2	3	5	4	5	5	5	4	4	3	4	4	5	5	4	5	2	4	3	3	4	5	3	3	4
18-25	Masculino	Branca	Ensino Médio completo	Não	Até 1 salário mínimo (R$ 1.320)	Não	Vicente Pires	Redes Particulares	Não	Não	Não	3	3	3	4	3	3	3	4	1	1	3	1	3	3	3	5	3	5	4	2	4	3	3	5	2	5	4	4	3	2	3	2	2	1	2	3	3	3
18-25	Feminino	Parda	Ensino Médio completo	Sim, com vínculo empregatício	Até 1 salário mínimo (R$ 1.320)	Não	Paranoá	SUS e Redes Particulares	Não	Não	Depressão	3	4	3	4	4	3	4	4	4	2	3	3	4	4	4	4	4	4	5	2	5	5	3	5	1	5	5	1	4	5	5	5	5	4	5	4	2	3
18-25	Feminino	Preta	Superior Incompleto	Sim, com vínculo empregatício	Até 1 salário mínimo (R$ 1.320)	Não	Ceilândia	SUS	Não	Não	Não	4	4	4	3	3	4	4	4	4	3	4	4	4	4	2	5	5	5	5	5	5	5	2	5	5	5	5	5	5	5	5	5	4	4	5	3	2	4
18-25	Feminino	Branca	Ensino Médio completo	Sim, com vínculo empregatício	Até 1 salário mínimo (R$ 1.320)	Não	Santa Maria	SUS	Sim	Não	Depressão	4	4	3	4	4	3	4	4	4	2	4	3	4	4	2	5	5	4	5	5	5	2	2	5	5	5	5	4	5	5	5	5	5	4	5	3	3	4
18-25	Feminino	Preta	Superior Incompleto	Não	De 6 a 9 salários mínimos (R$7.920 a R$11.880)	Não	Gama	SUS e Redes Particulares	Não	Não	Não	4	3	3	3	4	3	3	4	2	3	4	3	4	3	3	4	2	5	5	4	4	5	4	4	3	5	4	4	4	3	4	4	4	4	4	4	3	4
18-25	Masculino	Branca	Superior Completo	Sim, sem vínculo empregatício	De 1 a 3 salários mínimos (R$1.320 a R$3.960)	Sim	Samambaia	SUS	Não	Não	Depressão	2	1	3	3	3	2	3	1	2	2	4	3	3	4	3	4	4	1	4	4	5	5	3	5	5	5	5	5	3	4	5	5	5	5	5	3	3	3
26-30	Feminino	Branca	Superior Completo	Sim, sem vínculo empregatício	De 1 a 3 salários mínimos (R$1.320 a R$3.960)	Não	Plano Piloto	SUS e Redes Particulares	Não	Não	Não	3	1	1	1	1	2	1	2	1	2	2	1	3	4	4	5	5	2	5	3	5	5	4	5	5	5	5	5	2	5	5	5	5	5	5	4	4	4
41-45	Masculino	Preta	Ensino Médio completo	Sim, com vínculo empregatício	De 1 a 3 salários mínimos (R$1.320 a R$3.960)	Não	Gama	SUS	Não	Não	Não	2	4	4	4	3	3	2	4	3	4	4	2	3	4	1	5	2	4	5	4	4	5	2	5	4	5	5	5	5	5	5	5	5	5	5	3	3	2
26-30	Masculino	Parda	Superior Completo	Não	Até 1 salário mínimo (R$ 1.320)	Não	Lago Sul	SUS e Redes Particulares	Sim	Não	Não	3	4	4	4	4	3	2	2	4	2	4	3	3	3	3	4	5	4	5	4	5	5	4	5	4	5	5	5	2	1	4	4	4	2	2	2	3	4
18-25	Masculino	Branca	Superior Incompleto	Não	De 1 a 3 salários mínimos (R$1.320 a R$3.960)	Não	Recanto Das Emas	SUS e Redes Particulares	Não	Não	Não	3	3	3	3	3	1	2	3	4	3	2	4	2	4	1	5	5	5	5	1	1	1	1	1	1	1	1	1	1	1	2	1	5	1	3	3	1	3
31-35	Feminino	Branca	Superior Completo	Sim, com vínculo empregatício	De 1 a 3 salários mínimos (R$1.320 a R$3.960)	Não	Recanto Das Emas	SUS	Sim	Não	Hipertensão/pressão alta	3	3	2	2	2	3	1	3	1	4	3	3	2	2	4	2	4	2	2	2	4	4	2	4	4	5	5	4	4	2	2	4	2	1	3	3	3	3
18-25	Feminino	Branca	Superior Incompleto	Não	Até 1 salário mínimo (R$ 1.320)	Não	Planaltina	SUS e Redes Particulares	Sim	Não	Hipertensão/pressão alta	3	4	2	3	3	3	4	4	3	3	4	3	3	3	4	3	4	3	3	5	5	4	4	4	3	5	4	5	4	4	4	4	3	3	4	3	2	2
18-25	Masculino	Branca	Ensino Médio completo	Não	Até 1 salário mínimo (R$ 1.320)	Sim	Água Claras	SUS	Não	Não	Não	3	3	4	4	4	3	4	2	4	3	3	2	3	3	4	5	5	4	5	5	5	5	2	5	5	5	5	5	4	5	5	5	4	4	4	3	3	3
18-25	Masculino	Branca	Superior Incompleto	Sim, sem vínculo empregatício	De 1 a 3 salários mínimos (R$1.320 a R$3.960)	Não	Ceilândia	SUS	Não	Não	Não	1	1	3	1	3	3	3	1	3	3	4	4	4	4	1	4	5	5	5	1	4	2	1	2	5	2	5	5	3	4	4	4	3	1	1	2	3	2
26-30	Masculino	Parda	Superior Completo	Sim, sem vínculo empregatício	De 1 a 3 salários mínimos (R$1.320 a R$3.960)	Não	Plano Piloto	SUS e Redes Particulares	Não	Não	Não	3	3	3	3	3	3	4	2	1	4	4	4	3	3	2	4	4	5	5	3	4	2	4	4	3	5	5	5	2	4	4	3	3	1	3	3	3	4
18-25	Feminino	Preta	Superior Incompleto	Não	Até 1 salário mínimo (R$ 1.320)	Não	Paranoá	SUS	Não	Não	Diabetes	4	2	3	3	3	3	3	3	3	3	4	2	3	1	2	3	3	4	4	4	5	5	4	5	2	5	5	5	2	3	5	5	5	5	5	4	4	4
26-30	Masculino	Parda	Superior Incompleto	Sim, com vínculo empregatício	De 1 a 3 salários mínimos (R$1.320 a R$3.960)	Não	Plano Piloto	SUS	Não	Não	Hipertensão/pressão alta	3	4	3	4	2	3	4	4	3	3	4	2	4	4	2	3	1	1	2	5	5	3	5	5	2	5	4	4	1	4	4	4	4	4	4	2	3	2
18-25	Feminino	Branca	Superior Incompleto	Sim, sem vínculo empregatício	De 1 a 3 salários mínimos (R$1.320 a R$3.960)	Não	Plano Piloto	Redes Particulares	Sim	Não	Não	3	3	3	4	4	4	4	4	3	3	4	3	3	3	3	4	5	4	4	5	5	5	5	5	5	5	5	5	5	4	5	4	5	4	4	3	3	3
41-45	Masculino	Indígena	Ensino Médio completo	Sim, sem vínculo empregatício	De 3 a 6 salários mínimos (R$3.960 a R$7.920)	Não	Santa Maria	SUS	Não	Não	Não	4	3	3	1	1	3	3	1	1	1	3	2	1	1	4	4	4	4	4	1	2	2	2	4	5	4	5	4	4	1	4	2	3	1	2	3	3	2
18-25	Feminino	Parda	Superior Incompleto	Sim, sem vínculo empregatício	Até 1 salário mínimo (R$ 1.320)	Não	Brazlândia	SUS	Não	Não	Não	4	4	4	3	3	1	4	4	4	4	3	4	1	3	4	1	1	4	1	5	5	3	4	5	2	5	2	5	3	4	5	3	4	4	5	1	3	1
18-25	Feminino	Preta	Superior Incompleto	Não	De 10 a 20 salários mínimos (R$13.200 a R$26.400)	Não	Plano Piloto	Redes Particulares	Sim	Não	Depressão	4	4	3	4	4	3	3	4	3	3	4	2	3	3	3	5	5	2	5	4	4	5	5	5	2	5	1	5	3	4	2	4	3	3	3	3	2	3
18-25	Feminino	Parda	Ensino Médio Incompleto	Não	Até 1 salário mínimo (R$ 1.320)	Não	Ceilândia	SUS e Redes Particulares	Sim	Não	Depressão	3	4	4	4	4	4	4	3	4	3	3	2	1	1	2	5	5	5	5	5	5	3	4	5	5	5	5	5	3	5	5	5	5	5	5	0	3	3
31-35	Masculino	Parda	Superior Completo	Sim, com vínculo empregatício	De 3 a 6 salários mínimos (R$3.960 a R$7.920)	Não	Santa Maria	SUS	Não	Não	Não	3	4	2	3	3	1	3	4	3	3	3	2	2	4	2	3	2	3	2	4	4	3	5	5	5	1	1	2	3	3	2	3	2	3	3	3	3	3
18-25	Feminino	Branca	Superior Incompleto	Não	De 1 a 3 salários mínimos (R$1.320 a R$3.960)	Não	Taguatinga	SUS	Sim	Não	Câncer	3	3	4	4	4	3	4	4	3	3	4	2	4	4	1	2	3	1	3	2	5	5	5	5	1	2	3	4	5	5	5	5	5	5	5	0	1	1
18-25	Feminino	Branca	Superior Incompleto	Sim, sem vínculo empregatício	Até 1 salário mínimo (R$ 1.320)	Não	Candangolândia	Redes Particulares	Não	Não	Depressão	3	4	4	4	4	3	3	4	2	3	3	2	3	4	3	2	4	2	2	5	5	5	4	5	4	5	5	5	3	4	4	4	4	4	4	3	3	2
26-30	Masculino	Branca	Ensino Médio completo	Não	Até 1 salário mínimo (R$ 1.320)	Não	Gama	SUS	Não	Não	Não	4	4	3	3	3	2	4	3	2	2	3	3	3	3	2	4	4	4	5	5	5	4	4	5	5	5	5	5	4	4	4	4	5	5	4	3	3	4
18-25	Feminino	Branca	Ensino Médio completo	Não	De 10 a 20 salários mínimos (R$13.200 a R$26.400)	Não	Água Claras	Redes Particulares	Não	Não	Não	3	3	3	3	3	3	3	4	4	4	4	3	3	4	2	3	4	4	5	4	5	5	3	5	4	5	4	5	4	4	5	5	4	4	4	3	3	3
18-25	Feminino	Branca	Ensino Médio completo	Não	Até 1 salário mínimo (R$ 1.320)	Não	São Sebastião	SUS	Não	Não	Não	3	1	3	3	2	2	3	3	3	2	4	3	3	3	2	5	5	5	5	3	3	5	5	5	4	5	3	3	3	4	4	3	3	4	4	2	3	4
36-40	Feminino	Branca	Ensino Médio completo	Sim, com vínculo empregatício	De 1 a 3 salários mínimos (R$1.320 a R$3.960)	Não	Itapoã	SUS	Não	Não	Não	3	4	2	2	3	2	4	3	4	3	4	2	2	2	2	2	5	5	4	1	4	4	2	4	5	5	5	5	4	1	4	5	5	4	3	3	2	2
26-30	Feminino	Parda	Superior Completo	Sim, com vínculo empregatício	De 3 a 6 salários mínimos (R$3.960 a R$7.920)	Sim	Água Claras	SUS e Redes Particulares	Não	Não	Não	3	3	2	3	3	3	4	3	4	4	4	4	3	3	2	4	5	4	5	5	5	5	4	5	5	5	5	5	3	4	4	4	4	4	4	4	3	3
18-25	Feminino	Parda	Superior Incompleto	Sim, sem vínculo empregatício	De 1 a 3 salários mínimos (R$1.320 a R$3.960)	Não	Samambaia	SUS	Não	Não	Não	3	4	3	3	3	4	4	4	4	2	4	3	3	4	3	4	4	3	3	5	5	5	5	5	2	5	3	5	3	5	5	5	5	5	5	0	4	4
18-25	Masculino	Preta	Ensino Médio completo	Sim, sem vínculo empregatício	Até 1 salário mínimo (R$ 1.320)	Não	São Sebastião	SUS	Não	Não	Não	3	2	2	3	3	2	3	4	1	1	3	2	1	4	4	2	2	2	3	5	5	5	5	5	4	5	5	5	5	5	5	5	5	5	5	3	3	2
26-30	Feminino	Parda	Ensino Médio completo	Sim, com vínculo empregatício	De 1 a 3 salários mínimos (R$1.320 a R$3.960)	Não	Planaltina	SUS e Redes Particulares	Não	Não	Não	3	2	3	4	3	2	3	4	4	2	4	3	3	3	4	5	4	5	5	2	3	5	3	5	4	5	5	4	4	4	4	4	4	1	3	4	3	3
26-30	Masculino	Preta	Superior Incompleto	Sim, com vínculo empregatício	De 1 a 3 salários mínimos (R$1.320 a R$3.960)	Sim	Recanto Das Emas	SUS	Não	Não	Não	1	3	3	3	3	3	3	4	3	2	4	4	4	4	1	5	5	3	5	5	5	5	3	5	5	5	5	5	2	3	4	3	3	3	3	3	3	3
26-50	Masculino	Branca	Fundamental incompleto	Sim, com vínculo empregatício	De 3 a 6 salários mínimos (R$3.960 a R$7.920)	Sim	Planaltina	SUS	Não	Não	Não	3	3	3	3	3	3	3	4	3	2	4	4	3	3	3	1	1	2	2	4	5	5	2	5	5	5	5	5	4	2	5	4	3	4	4	1	2	2
26-30	Feminino	Preta	Superior Completo	Sim, com vínculo empregatício	De 1 a 3 salários mínimos (R$1.320 a R$3.960)	Não	Planaltina	SUS	Sim	Não	Depressão	3	4	3	2	4	2	4	3	4	4	2	3	4	2	2	4	5	5	5	5	5	5	5	5	5	5	5	5	5	5	5	5	5	5	5	3	3	2
26-30	Feminino	Preta	Superior Incompleto	Sim, sem vínculo empregatício	Até 1 salário mínimo (R$ 1.320)	Não	Ceilândia	SUS	Não	Não	Não	3	3	3	3	3	3	4	4	4	3	4	3	3	4	1	4	5	2	4	5	5	5	4	5	4	5	5	5	5	4	5	5	5	4	4	3	3	4
31-35	Masculino	Branca	Ensino Médio completo	Sim, com vínculo empregatício	De 1 a 3 salários mínimos (R$1.320 a R$3.960)	Não	Ceilândia	SUS e Redes Particulares	Não	Não	Não	3	3	4	4	2	3	4	1	1	4	3	1	3	4	2	5	1	5	1	2	4	5	2	4	4	1	1	5	4	4	4	4	1	1	3	2	3	4
18-25	Feminino	Parda	Fundamental incompleto	Não	Até 1 salário mínimo (R$ 1.320)	Não	Taguatinga	SUS	Não	Não	Depressão	3	2	1	4	1	2	3	2	3	3	4	4	4	2	1	2	3	3	3	3	3	3	2	2	1	3	2	5	2	3	3	2	2	2	2	4	4	4
18-25	Feminino	Parda	Superior Incompleto	Sim, com vínculo empregatício	Até 1 salário mínimo (R$ 1.320)	Sim	Santa Maria	SUS	Não	Não	Depressão	3	3	4	4	3	3	3	2	4	4	3	3	2	2	2	5	5	5	5	5	5	1	5	5	2	5	5	5	5	5	5	5	5	4	5	1	1	2
26-50	Masculino	Parda	Superior Completo	Sim, com vínculo empregatício	De 3 a 6 salários mínimos (R$3.960 a R$7.920)	Não	Planaltina	SUS e Redes Particulares	Não	Não	Não	3	2	2	4	3	2	4	4	2	2	3	2	2	3	3	4	4	4	4	4	5	1	2	4	3	4	4	2	4	2	4	4	4	2	4	3	3	3
18-25	Feminino	Parda	Superior Incompleto	Sim, com vínculo empregatício	De 1 a 3 salários mínimos (R$1.320 a R$3.960)	Não	Guará	SUS	Não	Não	Não	3	4	3	3	3	3	3	2	2	2	3	2	3	4	3	4	4	4	5	4	5	5	4	5	5	5	4	5	4	4	4	5	3	4	4	2	3	3
18-25	Masculino	Preta	Ensino Médio Incompleto	Sim, sem vínculo empregatício	De 1 a 3 salários mínimos (R$1.320 a R$3.960)	Não	Itapoã	SUS	Não	Não	Não	3	3	3	4	4	3	3	3	3	3	3	3	3	2	2	3	3	5	4	4	4	4	4	4	2	4	2	4	4	5	5	5	3	3	4	4	3	3
26-50	Feminino	Branca	Ensino Médio completo	Sim, sem vínculo empregatício	Até 1 salário mínimo (R$ 1.320)	Não	Lago Norte	SUS	Não	Não	Depressão	4	3	4	3	3	3	4	4	4	3	4	3	3	3	3	5	4	2	2	4	5	5	4	4	4	5	5	5	4	4	4	4	4	4	4	1	1	2
26-30	Feminino	Parda	Ensino Médio completo	Sim, sem vínculo empregatício	De 3 a 6 salários mínimos (R$3.960 a R$7.920)	Sim	Planaltina	SUS e Redes Particulares	Não	Não	Não	3	3	3	3	3	3	3	1	3	3	4	4	3	4	1	2	2	5	1	5	5	5	3	5	3	5	3	5	3	3	3	3	4	1	3	3	3	3
31-35	Masculino	Parda	Superior Incompleto	Sim, com vínculo empregatício	Até 1 salário mínimo (R$ 1.320)	Não	Vicente Pires	SUS e Redes Particulares	Não	Não	Não	3	3	3	3	3	2	4	4	3	3	3	2	3	4	3	1	5	4	3	2	2	5	3	5	3	3	5	5	1	1	3	4	3	3	3	3	3	2
31-35	Feminino	Branca	Superior Completo	Sim, com vínculo empregatício	De 1 a 3 salários mínimos (R$1.320 a R$3.960)	Não	Candangolândia	SUS	Não	Não	Não	2	3	3	4	4	3	3	3	3	2	3	3	3	2	2	4	4	4	4	4	5	5	3	5	4	5	5	5	3	4	4	4	4	4	4	3	3	3
18-25	Masculino	Preta	Ensino Médio completo	Não	Até 1 salário mínimo (R$ 1.320)	Não	Paranoá	SUS	Não	Não	Não	2	2	2	2	2	2	2	2	1	1	3	3	1	1	3	5	4	4	4	2	2	3	3	3	3	3	3	3	3	3	3	3	3	3	3	1	1	1
26-30	Masculino	Preta	Superior Completo	Sim, com vínculo empregatício	De 3 a 6 salários mínimos (R$3.960 a R$7.920)	Sim	Taguatinga	SUS	Não	Não	Depressão	3	4	4	4	3	4	4	4	4	1	4	3	4	4	1	1	1	5	5	5	1	5	1	1	5	5	5	5	3	2	5	5	5	1	1	1	1	1
36-40	Masculino	Branca	Ensino Médio completo	Sim, sem vínculo empregatício	De 6 a 9 salários mínimos (R$7.920 a R$11.880)	Não	Plano Piloto	SUS	Sim	Não	Diabetes	3	3	3	3	2	3	2	3	2	3	3	3	3	3	3	3	4	4	4	1	4	5	2	4	2	3	2	2	2	2	2	2	2	2	2	2	2	2
18-25	Feminino	Preta	Ensino Médio Incompleto	Sim, com vínculo empregatício	Até 1 salário mínimo (R$ 1.320)	Não	São Sebastião	SUS	Não	Não	Não	3	3	3	3	2	4	4	4	2	2	3	3	3	3	2	5	5	5	5	1	1	1	3	3	1	2	3	3	2	1	4	3	1	5	5	0	0	0
31-35	Masculino	Branca	Superior Incompleto	Sim, com vínculo empregatício	De 3 a 6 salários mínimos (R$3.960 a R$7.920)	Sim	Samambaia	SUS e Redes Particulares	Sim	Não	Não	2	3	3	3	3	3	3	3	3	2	3	3	3	3	2	5	5	5	5	4	4	4	2	4	4	5	5	5	5	5	5	5	5	3	5	0	4	4
50+	Masculino	Preta	Fundamental incompleto	Não	De 1 a 3 salários mínimos (R$1.320 a R$3.960)	Sim	Plano Piloto	SUS	Sim	Sim	Câncer	2	4	3	2	2	3	4	4	1	1	4	2	3	4	2	5	2	4	4	5	1	1	2	4	4	5	5	5	2	1	4	4	5	4	4	3	3	1
18-25	Masculino	Preta	Ensino Médio Incompleto	Sim, com vínculo empregatício	De 1 a 3 salários mínimos (R$1.320 a R$3.960)	Não	Guará	SUS	Não	Não	Não	3	3	3	3	4	3	3	4	4	1	1	1	3	3	2	5	5	5	5	4	1	4	1	1	5	5	4	1	2	4	5	5	2	2	3	2	0	0
18-25	Feminino	Parda	Superior Incompleto	Sim, sem vínculo empregatício	De 1 a 3 salários mínimos (R$1.320 a R$3.960)	Não	Gama	SUS	Não	Não	Não	3	3	3	2	4	3	4	4	3	4	4	4	3	3	3	2	1	5	4	2	5	5	3	5	5	5	2	5	3	4	4	3	3	3	3	2	2	2
18-25	Feminino	Parda	Ensino Médio completo	Sim, com vínculo empregatício	De 1 a 3 salários mínimos (R$1.320 a R$3.960)	Não	Santa Maria	Redes Particulares	Não	Não	Não	3	4	3	3	4	4	4	3	4	4	3	2	4	4	1	5	5	4	5	4	4	5	4	5	5	5	5	5	2	2	4	4	4	4	4	0	2	2
50+	Masculino	Parda	Superior Completo	Não	De 3 a 6 salários mínimos (R$3.960 a R$7.920)	Não	Taguatinga	SUS e Redes Particulares	Sim	Não	Hipertensão/pressão alta	2	3	2	3	3	2	4	3	4	2	4	2	3	4	2	5	5	4	5	4	4	4	2	5	5	5	5	5	3	2	4	4	3	1	4	3	2	4
36-40	Feminino	Branca	Superior Completo	Sim, com vínculo empregatício	De 3 a 6 salários mínimos (R$3.960 a R$7.920)	Não	Plano Piloto	SUS e Redes Particulares	Não	Não	Não	3	4	3	4	4	4	4	4	3	1	4	3	3	4	4	4	4	2	4	5	5	5	3	4	4	5	2	5	2	2	3	2	2	2	2	3	3	3
41-45	Feminino	Parda	Ensino Médio completo	Sim, sem vínculo empregatício	De 1 a 3 salários mínimos (R$1.320 a R$3.960)	Não	Planaltina	SUS e Redes Particulares	Não	Não	Não	3	3	3	3	3	3	3	2	3	2	4	3	3	3	3	2	2	4	1	5	5	5	1	5	4	5	5	5	2	1	5	5	3	1	2	2	0	2
18-25	Feminino	Branca	Ensino Médio completo	Sim, com vínculo empregatício	Até 1 salário mínimo (R$ 1.320)	Não	Samambaia	SUS e Redes Particulares	Não	Não	Não	3	4	3	4	4	3	3	4	3	3	4	3	3	4	3	4	4	5	5	2	2	5	2	4	5	5	5	5	5	4	4	4	4	4	4	3	3	3
26-30	Masculino	Branca	Superior Completo	Sim, com vínculo empregatício	De 3 a 6 salários mínimos (R$3.960 a R$7.920)	Não	Samambaia	Redes Particulares	Sim	Não	Depressão	2	1	3	4	3	3	3	3	3	2	4	4	3	3	2	3	3	2	3	3	5	5	4	5	4	4	4	4	4	4	4	4	4	4	4	3	3	3
26-30	Feminino	Parda	Superior Completo	Sim, com vínculo empregatício	De 3 a 6 salários mínimos (R$3.960 a R$7.920)	Não	Plano Piloto	SUS e Redes Particulares	Não	Não	Não	3	4	4	3	4	3	4	3	4	3	4	2	3	3	2	5	5	4	5	4	5	4	4	5	5	5	5	5	4	2	4	4	5	4	4	4	3	4
41-45	Feminino	Branca	Superior Completo	Não	De 3 a 6 salários mínimos (R$3.960 a R$7.920)	Não	Planaltina	SUS e Redes Particulares	Não	Não	Não	3	3	1	4	4	3	4	1	4	4	4	1	4	2	3	1	4	4	5	5	5	5	2	5	5	5	5	5	3	5	5	2	3	4	4	4	2	3
26-50	Masculino	Branca	Superior Completo	Sim, com vínculo empregatício	De 10 a 20 salários mínimos (R$13.200 a R$26.400)	Não	Vicente Pires	SUS e Redes Particulares	Não	Não	Não	3	3	3	2	3	3	3	2	1	4	4	2	3	4	2	5	1	5	4	5	5	5	5	5	5	5	5	5	4	4	4	4	4	4	4	3	3	3
31-35	Feminino	Preta	Ensino Médio completo	Sim, sem vínculo empregatício	De 1 a 3 salários mínimos (R$1.320 a R$3.960)	Não	Água Claras	SUS	Não	Sim	Outra	3	3	3	4	3	3	4	4	3	3	4	3	3	4	2	2	1	2	3	4	5	5	5	5	5	5	5	5	4	5	4	4	3	4	4	3	3	2
31-35	Feminino	Indígena	Ensino Médio completo	Não	Até 1 salário mínimo (R$ 1.320)	Não	Guará	SUS	Sim	Não	Não	3	3	2	3	3	3	4	4	3	3	4	2	2	4	2	4	4	4	5	5	5	5	4	5	4	5	5	5	5	1	4	4	5	2	4	3	2	4
26-50	Feminino	Parda	Fundamental incompleto	Não	Até 1 salário mínimo (R$ 1.320)	Não	São Sebastião	SUS	Não	Não	Não	3	3	3	3	3	3	3	4	3	2	4	3	3	3	2	5	4	2	5	5	5	5	4	5	5	5	5	5	4	1	2	3	4	1	2	0	0	2
36-40	Masculino	Branca	Superior Completo	Sim, sem vínculo empregatício	De 3 a 6 salários mínimos (R$3.960 a R$7.920)	Não	Plano Piloto	SUS e Redes Particulares	Não	Não	Não	2	3	3	4	3	3	4	3	4	3	3	3	3	3	3	4	2	4	5	5	5	5	4	5	5	5	5	5	3	4	5	5	4	4	4	2	2	3
26-50	Feminino	Parda	Superior Incompleto	Não	De 1 a 3 salários mínimos (R$1.320 a R$3.960)	Não	Sol Nascente/Pôr do Sol	SUS	Sim	Não	Hipertensão/pressão alta	3	4	4	3	4	3	4	4	4	2	4	3	3	4	2	4	2	2	2	2	5	2	4	2	4	5	5	5	3	1	4	4	1	1	2	1	3	4
36-40	Masculino	Parda	Superior Completo	Sim, com vínculo empregatício	De 6 a 9 salários mínimos (R$7.920 a R$11.880)	Não	Samambaia	SUS e Redes Particulares	Sim	Não	Não	2	3	2	3	2	3	3	1	2	3	3	3	3	1	4	4	3	4	4	4	5	5	3	5	4	2	5	4	3	2	3	3	3	2	3	4	3	2
41-45	Feminino	Parda	Fundamental incompleto	Sim, sem vínculo empregatício	Até 1 salário mínimo (R$ 1.320)	Não	Planaltina	SUS e Redes Particulares	Não	Não	Não	3	3	3	3	3	3	3	4	3	3	4	4	3	3	2	5	1	5	5	4	5	5	1	2	1	5	5	5	1	1	4	4	4	1	3	2	2	1
18-25	Masculino	Branca	Superior Incompleto	Sim, com vínculo empregatício	Até 1 salário mínimo (R$ 1.320)	Não	Planaltina	SUS e Redes Particulares	Não	Não	Diabetes	3	3	2	4	4	3	2	4	3	2	4	3	3	3	3	2	3	4	5	4	2	5	4	5	5	5	5	4	4	4	4	5	4	4	4	1	3	3
18-25	Feminino	Branca	Superior Incompleto	Não	Até 1 salário mínimo (R$ 1.320)	Não	Planaltina	SUS e Redes Particulares	Não	Não	Não	3	4	3	4	4	3	4	3	3	3	4	3	3	3	3	4	5	2	5	4	5	5	4	5	4	5	5	2	3	4	4	3	3	4	2	2	2	4
26-50	Feminino	Branca	Superior Completo	Sim, com vínculo empregatício	De 3 a 6 salários mínimos (R$3.960 a R$7.920)	Não	Planaltina	SUS e Redes Particulares	Não	Não	Não	3	4	1	4	4	3	4	4	4	3	4	2	3	4	2	5	5	4	5	5	5	5	4	5	5	5	5	5	5	2	4	4	5	4	4	4	3	4
26-30	Feminino	Branca	Ensino Médio completo	Não	Até 1 salário mínimo (R$ 1.320)	Não	Itapoã	SUS e Redes Particulares	Não	Não	Não	3	3	3	3	3	3	3	3	4	2	3	3	3	3	2	4	3	5	4	5	5	5	5	5	5	5	5	5	4	4	4	4	4	4	4	4	4	3
26-50	Feminino	Parda	Ensino Médio Incompleto	Sim, com vínculo empregatício	De 1 a 3 salários mínimos (R$1.320 a R$3.960)	Não	Planaltina	SUS e Redes Particulares	Não	Não	Não	3	3	4	3	3	3	3	3	4	2	4	3	3	3	2	2	4	1	2	5	4	5	2	5	5	5	4	4	4	2	4	4	5	2	4	4	2	2
18-25	Feminino	Branca	Superior Incompleto	Não	Até 1 salário mínimo (R$ 1.320)	Sim	Planaltina	SUS	Não	Não	Ansiedade	2	3	3	3	4	3	3	3	4	3	4	2	3	4	3	5	5	4	5	4	5	5	4	5	4	5	5	5	3	4	4	4	5	4	5	2	3	3
26-30	Feminino	Preta	Ensino Médio Incompleto	Sim, com vínculo empregatício	Até 1 salário mínimo (R$ 1.320)	Não	Planaltina	SUS	Não	Não	Não	3	4	3	4	4	3	4	4	4	2	4	2	2	3	2	4	5	2	5	5	5	5	2	5	5	5	5	4	5	4	5	2	5	4	1	3	3	2
26-30	Feminino	Branca	Superior Completo	Sim, sem vínculo empregatício	De 3 a 6 salários mínimos (R$3.960 a R$7.920)	Não	Planaltina	SUS e Redes Particulares	Não	Não	Não	1	1	3	4	4	3	4	4	4	2	4	4	3	3	2	5	5	1	5	5	5	5	2	5	4	5	5	5	2	4	4	4	4	4	4	0	0	0
18-25	Feminino	Parda	Ensino Médio completo	Sim, com vínculo empregatício	De 1 a 3 salários mínimos (R$1.320 a R$3.960)	Não	Planaltina	SUS e Redes Particulares	Sim	Não	Depressão	3	3	3	3	3	2	3	3	3	4	3	3	3	3	2	4	4	4	4	4	4	5	4	2	4	2	2	2	2	3	4	2	2	1	4	4	3	1
36-40	Feminino	Parda	Ensino Médio completo	Sim, sem vínculo empregatício	Até 1 salário mínimo (R$ 1.320)	Não	Planaltina	SUS	Não	Não	Não	3	3	3	3	3	3	4	4	1	1	4	4	3	3	2	1	5	1	5	4	1	5	1	1	5	4	5	2	2	1	3	4	5	1	2	2	2	1
41-45	Masculino	Parda	Ensino Médio completo	Sim, com vínculo empregatício	De 1 a 3 salários mínimos (R$1.320 a R$3.960)	Não	Planaltina	SUS	Não	Não	Não	3	3	3	3	3	3	3	2	2	3	4	4	3	2	2	4	2	5	3	4	5	5	5	5	5	5	5	5	4	5	5	5	5	4	5	0	3	0
36-40	Masculino	Branca	Ensino Médio completo	Sim, com vínculo empregatício	De 1 a 3 salários mínimos (R$1.320 a R$3.960)	Não	Planaltina	SUS	Não	Não	Não	3	3	3	3	3	3	3	3	4	2	4	2	3	3	2	3	3	3	3	5	5	5	5	5	5	5	5	5	3	3	4	4	4	4	4	0	3	0
31-35	Feminino	Preta	Fundamental incompleto	Sim, com vínculo empregatício	Até 1 salário mínimo (R$ 1.320)	Não	Planaltina	SUS	Não	Não	Não	3	3	3	4	4	2	1	3	4	3	4	4	4	4	1	3	3	3	3	5	5	2	3	3	3	3	1	1	3	3	3	3	3	3	3	0	0	0
26-30	Masculino	Parda	Superior Incompleto	Sim, com vínculo empregatício	De 1 a 3 salários mínimos (R$1.320 a R$3.960)	Não	Planaltina	SUS	Não	Sim	Não	3	3	3	3	4	3	4	4	2	3	4	4	4	4	1	5	4	4	4	1	5	5	5	5	5	5	5	5	3	3	2	2	4	4	1	2	2	3
18-25	Feminino	Parda	Superior Completo	Sim, com vínculo empregatício	Até 1 salário mínimo (R$ 1.320)	Não	Planaltina	Redes Particulares	Sim	Não	Não	3	3	3	4	3	3	3	3	3	3	2	2	3	2	3	3	3	3	3	5	5	5	5	5	3	5	2	5	4	4	4	4	5	4	4	4	4	3
31-35	Feminino	Parda	Superior Completo	Sim, com vínculo empregatício	Até 1 salário mínimo (R$ 1.320)	Não	Planaltina	SUS	Não	Não	Não	3	3	3	3	4	3	4	2	4	3	3	2	2	2	2	5	5	2	5	5	5	5	4	4	5	5	5	5	4	3	1	2	4	3	4	4	4	4
26-30	Feminino	Branca	Ensino Médio completo	Sim, sem vínculo empregatício	De 1 a 3 salários mínimos (R$1.320 a R$3.960)	Não	Planaltina	SUS e Redes Particulares	Sim	Não	Hipertensão/pressão alta	3	3	3	4	4	2	3	4	4	3	4	3	3	4	2	4	2	5	4	4	4	5	2	4	5	5	5	5	4	1	4	4	5	2	2	3	3	2
18-25	Feminino	Parda	Ensino Médio completo	Não	Até 1 salário mínimo (R$ 1.320)	Não	Planaltina	SUS	Não	Não	Não	3	3	3	4	3	3	3	3	3	3	3	3	3	3	3	5	4	5	4	3	5	5	3	5	5	5	5	5	2	4	4	4	3	3	4	3	3	3
18-25	Feminino	Parda	Ensino Médio completo	Não	Até 1 salário mínimo (R$ 1.320)	Não	Planaltina	SUS	Não	Não	Não	2	3	4	3	3	3	3	1	4	4	4	2	3	3	4	5	5	3	5	4	5	5	2	5	5	5	5	5	3	2	3	3	3	1	3	3	2	2
18-25	Feminino	Branca	Ensino Médio completo	Sim, com vínculo empregatício	De 1 a 3 salários mínimos (R$1.320 a R$3.960)	Sim	Planaltina	SUS	Não	Não	Não	3	4	3	3	3	3	4	3	3	2	4	3	3	4	2	5	5	4	5	5	5	5	5	5	4	5	5	5	4	4	4	4	3	4	4	4	3	3
36-40	Feminino	Preta	Ensino Médio completo	Sim, com vínculo empregatício	De 1 a 3 salários mínimos (R$1.320 a R$3.960)	Não	Planaltina	SUS	Não	Não	Não	1	2	4	1	1	4	4	3	4	2	3	2	2	2	2	4	1	1	2	3	4	5	2	4	4	5	5	5	2	1	5	1	4	5	3	2	2	2
26-30	Feminino	Parda	Ensino Médio completo	Sim, com vínculo empregatício	De 1 a 3 salários mínimos (R$1.320 a R$3.960)	Não	Planaltina	SUS	Não	Não	Hipertensão/pressão alta	3	2	3	3	2	4	3	3	1	2	3	3	2	3	2	3	5	3	1	5	4	2	1	4	4	3	5	5	2	3	3	3	3	3	3	3	3	3
26-30	Feminino	Parda	Ensino Médio completo	Sim, com vínculo empregatício	Até 1 salário mínimo (R$ 1.320)	Não	Planaltina	SUS	Não	Não	Não	3	4	3	4	3	3	3	2	3	3	2	3	3	4	3	4	4	2	4	4	4	5	3	4	4	5	5	5	3	4	4	4	4	3	4	3	3	2
18-25	Feminino	Parda	Superior Incompleto	Sim, sem vínculo empregatício	Até 1 salário mínimo (R$ 1.320)	Não	Planaltina	SUS	Não	Não	Não	3	4	3	3	4	2	3	3	2	2	3	3	3	3	3	4	5	5	5	4	4	5	3	5	2	5	4	5	4	3	5	5	4	3	4	2	4	4
41-45	Masculino	Branca	Ensino Médio completo	Sim, sem vínculo empregatício	De 3 a 6 salários mínimos (R$3.960 a R$7.920)	Sim	Planaltina	SUS	Não	Não	Não	3	3	3	4	4	3	4	4	3	3	4	2	3	4	3	4	5	4	5	4	5	5	4	5	5	5	5	5	4	2	4	4	5	2	4	4	3	3
50+	Feminino	Parda	Fundamental incompleto	Não	De 1 a 3 salários mínimos (R$1.320 a R$3.960)	Não	Planaltina	SUS	Sim	Não	Doenças cardiovasculares	3	3	4	4	4	3	4	3	3	3	4	3	2	4	2	5	2	1	5	4	5	5	1	2	5	5	5	4	1	5	1	1	1	1	1	4	3	4
50+	Masculino	Parda	Fundamental completo	Não	De 1 a 3 salários mínimos (R$1.320 a R$3.960)	Sim	Riacho Fundo	SUS e Redes Particulares	Sim	Não	Depressão	2	4	3	3	3	3	3	3	2	1	4	2	3	1	4	2	2	1	1	4	5	5	1	5	4	4	4	4	1	1	2	2	2	1	1	2	2	2
50+	Feminino	Parda	Ensino Médio Incompleto	Sim, com vínculo empregatício	De 1 a 3 salários mínimos (R$1.320 a R$3.960)	Não	Núcleo Bandeirante	SUS	Sim	Não	Hipertensão/pressão alta	3	4	4	3	4	3	4	3	3	2	4	3	3	3	2	4	2	5	5	4	4	5	2	5	4	5	5	2	4	4	4	4	3	4	4	3	3	3
36-40	Masculino	Parda	Superior Completo	Sim, sem vínculo empregatício	De 1 a 3 salários mínimos (R$1.320 a R$3.960)	Sim	Planaltina	SUS e Redes Particulares	Não	Não	Não	3	3	4	3	3	2	3	3	2	3	4	2	3	3	3	5	5	4	4	2	2	2	2	5	5	5	5	5	5	4	5	5	5	4	4	3	3	3
31-35	Feminino	Parda	Superior Completo	Não	Até 1 salário mínimo (R$ 1.320)	Sim	Planaltina	SUS	Não	Sim	Não	3	3	4	3	4	3	3	4	4	1	4	3	4	3	3	5	5	4	5	5	5	5	5	5	5	5	5	5	5	5	5	5	5	5	5	2	2	3
26-50	Masculino	Branca	Superior Completo	Sim, com vínculo empregatício	Mais de 20 salários mínimos ( mais de R$26.400)	Não	Núcleo Bandeirante	Redes Particulares	Não	Não	Não	1	2	2	2	2	2	2	2	1	4	2	2	1	1	4	1	3	1	1	1	1	1	1	1	3	1	1	1	3	3	3	3	3	1	1	0	4	1
18-25	Feminino	Parda	Ensino Médio Incompleto	Sim, com vínculo empregatício	De 1 a 3 salários mínimos (R$1.320 a R$3.960)	Não	São Sebastião	SUS	Não	Não	Não	3	3	3	4	3	3	3	4	3	3	3	4	3	4	2	4	3	5	3	4	2	1	2	3	2	1	5	5	4	4	4	3	4	3	2	3	3	3
26-30	Feminino	Preta	Superior Completo	Sim, com vínculo empregatício	De 3 a 6 salários mínimos (R$3.960 a R$7.920)	Não	Riacho Fundo	SUS	Sim	Não	Depressão	3	4	4	4	4	4	4	3	4	3	4	4	4	3	2	5	2	4	5	5	5	5	4	5	5	5	5	5	5	5	5	5	5	5	5	3	3	4
18-25	Masculino	Parda	Superior Completo	Sim, com vínculo empregatício	De 1 a 3 salários mínimos (R$1.320 a R$3.960)	Não	Samambaia	SUS e Redes Particulares	Não	Não	Não	3	3	4	3	1	3	4	4	3	3	3	4	3	2	2	3	4	5	4	4	4	5	3	4	5	4	5	5	3	2	4	3	4	3	4	2	2	3
36-40	Masculino	Branca	Fundamental completo	Sim, com vínculo empregatício	De 1 a 3 salários mínimos (R$1.320 a R$3.960)	Sim	Núcleo Bandeirante	SUS	Não	Não	Não	2	3	3	3	4	3	3	3	4	3	4	3	3	1	4	4	4	2	4	5	5	5	2	4	4	4	5	2	4	2	4	4	4	2	4	3	3	4
50+	Feminino	Parda	Superior Completo	Não	Até 1 salário mínimo (R$ 1.320)	Sim	Estrutural/Scia	SUS e Redes Particulares	Sim	Não	Depressão	3	3	3	3	4	3	3	3	4	3	4	3	2	4	2	1	2	4	2	4	5	5	1	5	5	4	5	4	2	2	5	4	4	1	4	3	3	3
41-45	Feminino	Branca	Ensino Médio Incompleto	Não	Até 1 salário mínimo (R$ 1.320)	Não	Planaltina	SUS	Não	Não	Não	2	3	4	3	2	3	3	1	4	3	4	4	2	1	2	4	2	5	5	1	2	1	2	4	5	4	1	5	4	1	4	4	5	5	3	0	3	2
26-30	Feminino	Preta	Ensino Médio completo	Sim, sem vínculo empregatício	De 1 a 3 salários mínimos (R$1.320 a R$3.960)	Sim	Riacho Fundo	SUS	Não	Não	Depressão	3	3	3	4	3	3	3	3	4	3	4	2	3	4	2	2	2	5	4	5	2	5	4	5	5	5	5	5	5	4	5	4	5	5	5	2	3	3
50+	Masculino	Preta	Fundamental incompleto	Não	Até 1 salário mínimo (R$ 1.320)	Sim	Plano Piloto	SUS e Redes Particulares	Sim	Não	Hipertensão/pressão alta	3	4	4	3	3	3	3	4	3	3	4	3	3	3	2	2	2	4	2	5	5	5	2	5	5	5	5	5	5	4	4	5	4	1	4	2	2	2
50+	Masculino	Parda	Ensino Médio completo	Sim, com vínculo empregatício	De 1 a 3 salários mínimos (R$1.320 a R$3.960)	Não	Planaltina	Redes Particulares	Não	Não	Hipertensão/pressão alta	3	4	3	4	3	2	4	4	2	3	3	2	3	3	2	5	5	4	5	4	5	3	3	5	3	2	5	5	3	3	4	4	4	4	4	2	3	4
18-25	Masculino	Parda	Fundamental completo	Não	De 6 a 9 salários mínimos (R$7.920 a R$11.880)	Não	Santa Maria	SUS	Sim	Não	Depressão	2	3	3	2	3	1	3	4	1	1	2	4	2	2	2	4	4	3	5	5	5	5	3	5	5	4	5	3	4	5	5	5	5	4	3	0	2	3
31-35	Masculino	Preta	Ensino Médio completo	Sim, com vínculo empregatício	De 1 a 3 salários mínimos (R$1.320 a R$3.960)	Não	Gama	SUS	Não	Não	Não	2	3	1	3	4	1	2	1	4	4	2	4	1	1	3	4	3	2	1	3	2	3	5	3	3	2	1	1	1	2	3	3	4	4	5	2	2	2
26-50	Feminino	Branca	Ensino Médio completo	Sim, com vínculo empregatício	De 3 a 6 salários mínimos (R$3.960 a R$7.920)	Não	Riacho Fundo 2	SUS	Não	Não	Não	3	3	3	3	4	2	3	3	3	2	3	2	2	3	3	5	4	5	4	2	5	5	2	5	5	5	5	5	3	5	5	5	5	3	4	3	3	3
18-25	Feminino	Parda	Superior Completo	Sim, sem vínculo empregatício	De 1 a 3 salários mínimos (R$1.320 a R$3.960)	Não	Planaltina	SUS e Redes Particulares	Sim	Não	Depressão	3	4	4	4	3	3	4	4	3	3	4	2	3	3	3	5	4	2	5	5	5	5	4	5	5	5	5	5	4	4	5	5	5	5	5	3	3	3
18-25	Masculino	Parda	Ensino Médio completo	Sim, com vínculo empregatício	De 1 a 3 salários mínimos (R$1.320 a R$3.960)	Não	Planaltina	SUS e Redes Particulares	Não	Não	Não	3	3	4	3	4	3	3	4	3	2	3	2	3	3	2	5	4	5	4	5	5	5	5	4	5	5	5	5	3	4	5	5	5	3	5	0	3	3
26-30	Feminino	Preta	Não escolarizado	Sim, com vínculo empregatício	Até 1 salário mínimo (R$ 1.320)	Sim	Planaltina	SUS	Não	Não	Depressão	4	4	4	2	2	3	3	4	4	1	4	3	4	2	3	5	5	5	5	1	1	1	1	1	1	2	5	5	1	1	1	1	5	4	4	3	3	3
26-30	Feminino	Parda	Superior Incompleto	Sim, com vínculo empregatício	Até 1 salário mínimo (R$ 1.320)	Não	Planaltina	SUS e Redes Particulares	Sim	Não	Depressão	3	3	3	4	4	3	4	2	2	2	3	2	2	2	2	5	4	5	5	5	5	5	4	5	3	4	5	5	3	4	4	3	3	3	4	3	4	3
36-40	Feminino	Parda	Ensino Médio Incompleto	Sim, com vínculo empregatício	De 1 a 3 salários mínimos (R$1.320 a R$3.960)	Não	Planaltina	SUS e Redes Particulares	Não	Não	Hipertensão/pressão alta	4	3	3	3	3	2	3	3	3	4	3	3	3	2	3	2	1	5	2	4	1	2	4	2	5	4	4	2	5	1	4	2	1	1	1	2	2	2
26-30	Masculino	Preta	Superior Incompleto	Sim, com vínculo empregatício	Até 1 salário mínimo (R$ 1.320)	Sim	Planaltina	SUS	Não	Não	Não	2	1	3	1	1	3	2	1	1	4	2	2	1	1	2	3	5	4	4	2	2	2	2	2	1	5	5	5	5	1	1	1	1	1	1	1	1	0
18-25	Feminino	Parda	Superior Incompleto	Não	Até 1 salário mínimo (R$ 1.320)	Não	Planaltina	SUS	Não	Não	Não	3	3	3	4	3	3	3	3	2	2	3	3	4	3	1	5	5	5	5	4	5	5	4	5	5	5	5	5	3	2	3	3	2	2	3	3	0	3
26-30	Feminino	Parda	Superior Completo	Sim, com vínculo empregatício	De 3 a 6 salários mínimos (R$3.960 a R$7.920)	Não	Planaltina	SUS e Redes Particulares	Sim	Não	Outra	3	3	3	3	4	3	3	3	4	3	4	2	3	4	2	4	4	2	4	5	5	5	2	5	5	5	5	5	4	4	5	5	4	4	5	3	3	3
26-50	Feminino	Parda	Ensino Médio completo	Sim, com vínculo empregatício	De 1 a 3 salários mínimos (R$1.320 a R$3.960)	Não	Planaltina	SUS	Não	Não	Não	3	3	3	3	4	3	4	4	4	2	4	3	3	3	2	4	5	4	4	5	5	5	2	5	5	1	5	5	2	4	4	5	5	4	4	2	3	3
31-35	Feminino	Preta	Superior Completo	Sim, sem vínculo empregatício	De 3 a 6 salários mínimos (R$3.960 a R$7.920)	Não	Planaltina	SUS e Redes Particulares	Não	Não	Não	3	4	2	3	4	4	4	4	4	3	4	2	3	3	2	5	5	2	5	5	5	5	2	5	5	5	5	5	4	2	5	4	5	4	4	4	3	3
26-30	Feminino	Parda	Superior Incompleto	Sim, sem vínculo empregatício	Até 1 salário mínimo (R$ 1.320)	Não	Planaltina	SUS	Não	Não	Não	3	3	3	4	3	3	4	4	3	2	1	3	3	3	2	5	5	4	4	4	4	5	2	5	2	5	5	5	4	3	4	4	4	4	3	0	4	4
36-40	Feminino	Preta	Fundamental completo	Sim, com vínculo empregatício	Até 1 salário mínimo (R$ 1.320)	Não	Planaltina	SUS	Sim	Não	Não	4	4	4	3	4	4	4	4	4	2	1	3	3	2	3	5	5	5	4	5	5	5	1	5	5	5	5	5	2	2	4	1	2	2	4	2	3	3
18-25	Masculino	Branca	Ensino Médio completo	Sim, com vínculo empregatício	De 1 a 3 salários mínimos (R$1.320 a R$3.960)	Não	Riacho Fundo 2	SUS	Não	Não	Não	1	1	1	3	3	1	2	3	2	3	3	3	3	3	2	5	5	5	5	3	4	4	2	4	5	5	5	5	3	4	4	4	4	3	4	0	0	3
18-25	Feminino	Parda	Ensino Médio completo	Sim, com vínculo empregatício	Até 1 salário mínimo (R$ 1.320)	Não	Planaltina	SUS	Não	Não	Não	3	3	3	3	3	3	3	3	3	2	3	3	3	3	2	5	4	4	4	2	2	3	3	3	3	3	3	3	4	3	3	4	3	3	3	3	3	3
41-45	Feminino	Preta	Ensino Médio completo	Sim, com vínculo empregatício	De 1 a 3 salários mínimos (R$1.320 a R$3.960)	Não	Planaltina	SUS e Redes Particulares	Não	Não	Não	3	3	3	4	4	3	3	4	3	2	3	4	3	3	2	2	5	2	4	4	4	5	4	4	5	5	5	4	4	5	5	5	5	1	4	2	3	3
18-25	Feminino	Preta	Superior Incompleto	Sim, sem vínculo empregatício	De 1 a 3 salários mínimos (R$1.320 a R$3.960)	Não	Ceilândia	SUS e Redes Particulares	Não	Não	Não	4	4	3	3	4	3	4	4	3	3	1	3	3	3	4	4	4	1	4	5	5	5	2	5	3	5	5	5	5	4	4	4	4	2	4	2	2	3
41-45	Feminino	Preta	Ensino Médio completo	Sim, sem vínculo empregatício	De 1 a 3 salários mínimos (R$1.320 a R$3.960)	Não	Planaltina	SUS	Não	Não	Não	2	2	3	3	2	2	3	2	3	3	2	2	2	3	2	2	2	2	2	2	2	2	2	5	5	4	5	5	4	1	4	4	2	1	3	2	2	3
18-25	Feminino	Preta	Superior Incompleto	Sim, sem vínculo empregatício	Até 1 salário mínimo (R$ 1.320)	Não	Sobradinho	SUS e Redes Particulares	Sim	Não	Não	3	4	3	3	4	2	4	3	4	4	3	2	3	3	2	5	4	2	2	5	5	5	4	5	5	5	5	5	4	4	5	4	5	2	5	4	4	3
[truncated: 46 more rows]
[truncated: 3 more columns]

## Sheet: Cod
[truncated: 5,166 more chars]
